# Supplementary material for: Exploring the pangenome of Mycoplasma hyorhinis in search of potential virulence markers
Source: Research Square preprint supplement (doi:10.21203/rs.3.rs-7195312/v1), 2025-08-22
Supplement: Supplementary file 1 [file 37b61a2bdf191988b5405667.xlsx]

## Sheet: supp-table5
Supplementary table 4. Biomass equation used to generate genome-scale metabolic models of M. hyorhinis in Carveme (highlighted in yellow). Carveme available equations for other taxa are also shown.
bigg_id	comp	seed_id	@bacteria	@mhyorhinis	@grampos	@gramneg	@archaea	@iAF1260	@iJO1366	@iYO844	@iAF692	name	observations
10fthf	c	cpd00201	-0.000223	-0.0002	-0.000223	-0.000223	-0.000223	-0.000223	-0.000223	-0.000367		10-Formyltetrahydrofolate	cofactor
2fe2s	c	cpd24604							-2.6e-05			[2Fe-2S] iron-sulfur cluster	cofactor
2ohph	c	cpd03445						-0.000223	-0.000223			2-Octaprenyl-6-hydroxyphenol	cofactor
3hdpgpe	c	cpd15817					-0.025				-0.002698	2-O-(3'-hydroxy)phytanyl-3-O-phytanyl-sn-glycero-l-phosphoethanolamine	lipid
3hdpgpg	c	cpd15818					-0.025				-0.01012	2-O-(3'-hydroxy)phytanyl-3-O-phytanyl-sn-glycerol-1-phospho-3'-sn-glycerol	lipid
3hdpgpi	c	cpd15819					-0.025				-0.01349	2-O-(3'-hydroxyl)phytanyl-3-O-phytanyl-sn-glycero-1-phospho-myo-inositol	lipid
3hdpgps	c	cpd15820					-0.025				-0.01147	2-O-(3'-hydroxy)phytanyl-3-O-phytanyl-sn-glycero-l-phosphoserine	lipid
4fe4s	c	cpd24682							-0.00026			[4Fe-4S] iron-sulfur cluster	cofactor
accoa	c	cpd00022									-5e-05	Acetyl-CoA	cofactor
adocblhbi	c	cpd15834									-0.00474	Adenosylcobalamin-HBI	cofactor
adp	c	cpd00008	53.95	11.4668	53.95	53.95	53.95	59.81	53.95	104.997	29.998	ADP	cofactor
ala__L	c	cpd00035	-0.513689	-0.244	-0.513689	-0.513689	-0.513689	-0.5137	-0.513689	-0.266902	-0.5621	L-Alanine	protein
amet	c	cpd00017	-0.000223	-0.0002	-0.000223	-0.000223	-0.000223	-0.000223	-0.000223			S-Adenosyl-L-methionine	cofactor
amp	c	cpd00018								-0.00467	-0.001	AMP	cofactor
arg__L	c	cpd00051	-0.295792	-0.1405	-0.295792	-0.295792	-0.295792	-0.2958	-0.295792	-0.193021	-0.3237	L-Arginine	protein
asn__L	c	cpd00132	-0.241055	-0.3651	-0.241055	-0.241055	-0.241055	-0.2411	-0.241055	-0.147987	-0.2638	L-Asparagine	protein
asp__L	c	cpd00041	-0.241055	-0.2292	-0.241055	-0.241055	-0.241055	-0.2411	-0.241055	-0.148014	-0.2638	L-Aspartate	protein
atp	c	cpd00002	-54.1248	-11.537	-54.1248	-54.1248	-54.1248	-59.984	-54.1248	-105.053	-30.1846	ATP	energy
bmocogdp	c								-0.000122			Bis-molybdopterin guanine dinucleotide	cofactor
btn	c	cpd00104							-2e-06			Biotin	vitamin B7
ca2	c	cpd00063	-0.005205	-0.0032	-0.005205	-0.005205	-0.005205	-0.004737	-0.005205	-0.003205		Calcium	cofactor
cdlp_BS	c	cpd11426		-0.0197						-5e-06		Cardiolipin B subtilis C7172H13744O1700P200
cdp	c	cpd00096								-0.000251		CDP	cofactor
cl	c	cpd00099	-0.005205	-0.0047	-0.005205	-0.005205	-0.005205	-0.004737	-0.005205			Chloride	cofactor
cmp	c	cpd00046								-0.001042		CMP	cofactor
coa	c	cpd00010	-0.000576	-0.0006	-0.000576	-0.000576	-0.000576	-0.000576	-0.000576		-6e-06	Coenzyme A	cofactor
cob	c	cpd02817									-0.0005	Coenzyme b	cofactor
cobalt2	c	cpd00149	-0.0001	-0.0032	-0.0001	-0.0001	-0.0001	-0.003158	-2.5e-05			Co2+	cofactor
com	c	cpd02246									-0.02056	Coenzyme m	cofactor
ctp	c	cpd00052	-0.133508	-0.0511	-0.133508	-0.133508	-0.133508	-0.1335	-0.133508	-0.038902	-0.1379	CTP	rna
cu2	c	cpd00058	-0.000709	-0.0032	-0.000709	-0.000709	-0.000709	-0.003158	-0.000709			Cu2+	cofactor
cys__L	c	cpd00084	-0.09158	-0.02	-0.09158	-0.09158	-0.09158	-0.09158	-0.09158	-0.05699	-0.1002	L-Cysteine	protein
d12dg_BS	c	cpd11428								-0.00011		Diglucosyl 1 2 diacylglycerol C4636H8672O1500	lipid
datp	c	cpd00115	-0.026166	-0.0702	-0.026166	-0.026166	-0.026166	-0.02617	-0.026166	-0.022982	-0.03312	DATP	dna
dctp	c	cpd00356	-0.027017	-0.0275	-0.027017	-0.027017	-0.027017	-0.02702	-0.027017	-0.01738	-0.02153	DCTP	dna
dgtp	c	cpd00241	-0.027017	-0.0275	-0.027017	-0.027017	-0.027017	-0.02702	-0.027017	-0.017398	-0.02153	DGTP	dna
dpgpe	c	cpd15858					-0.025				-0.000674	2,3-O-phytanyl-sn-glycero-1-phosphoethanolamine	lipid
dpgpg	c	cpd15859					-0.025				-0.000674	2,3-di-O-phytanyl-sn-glycerol-1-phospho-3'-sn-glycerol	lipid
dpgpi	c	cpd15860					-0.025				-0.002698	2,3-O-phytanyl-sn-glycero-1-phospho-myo-inositol	lipid
dpgps	c	cpd15861					-0.025				-0.001349	2,3-O-phytanyl-sn-glycero-1-phosphoserine	lipid
dttp	c	cpd00357	-0.026166	-0.0702	-0.026166	-0.026166	-0.026166	-0.02617	-0.026166	-0.022899	-0.03312	DTTP	dna
f390a	c	cpd15862									-5e-06	Coenzyme F390 (adenosine)	cofactor
f390g	c	cpd15863									-5e-06	Coenzyme F390 (guanosine)	cofactor
f420_2	c	cpd00649									-4.3e-05	Coenzyme ferredoxin 420-2 (oxidized)	cofactor
f420_3	c	cpd15868									-2.6e-05	Coenzyme ferredoxin 420-3	cofactor
f420_4	c	cpd15869									-0.000374	Coenzyme ferredoxin 420-4	cofactor
f420_5	c	cpd15870									-0.000299	Coenzyme ferredoxin 420-5	cofactor
f420_6	c	cpd15871									-1.1e-05	Coenzyme ferredoxin 420-6	cofactor
f420_7	c	cpd15872									-1e-06	Coenzyme ferredoxin 420-7	cofactor
f430	c										-0.002	Coenzyme F430	cofactor
fad	c	cpd00015	-0.000223	-0.0002	-0.000223	-0.000223	-0.000223	-0.000223	-0.000223			FAD	cofactor
fe2	c	cpd10515	-0.006715	-0.0071	-0.006715	-0.006715	-0.006715	-0.007106	-0.006715			Fe2+	cofactor
fe3	c	cpd10516	-0.007808	-0.0034	-0.007808	-0.007808	-0.007808	-0.007106	-0.007808	-0.00345		Fe3+	cofactor
gdp	c	cpd00031								-0.00018		GDP	cofactor
gdpgpi	c	cpd15880					-0.025				-0.01619	Glucosaminyl archaetidyl-myo-inositol	lipid
gln__L	c	cpd00053	-0.26316	-0.1935	-0.26316	-0.26316	-0.26316	-0.2632	-0.26316	-0.260335	-0.288	L-Glutamine	protein
glu__L	c	cpd00023	-0.26316	-0.3094	-0.26316	-0.26316	-0.26316	-0.2632	-0.26316	-0.260378	-0.288	L-Glutamate	protein
gly	c	cpd00033	-0.612638	-0.2176	-0.612638	-0.612638	-0.612638	-0.6126	-0.612638	-0.408288	-0.6704	Glycine	protein
glycogen	c	cpd00155									-0.01543	Glycogen	carbohydrate
gmp	c	cpd00126								-0.000503		GMP	cofactor
gtca1_45_BS	c	cpd15667			-0.001					-0.003624		Glycerol teichoic acid n45 unlinked unsubstituted C151H297N2O238P46	cellwall
gtca2_45_BS	c	cpd15668			-0.001					-0.002347		Glycerol teichoic acid n45 unlinked D ala substituted C286H612N47O328P46	cellwall
gtca3_45_BS	c	cpd15669			-0.001					-0.001819		Glycerol teichoic acid n45 unlinked glucose substituted C421H749N2O464P46	cellwall
gtp	c	cpd00038	-0.215096	-0.0549	-0.215096	-0.215096	-0.215096	-0.2151	-0.215096	-0.062667	-0.2222	GTP	rna
h	c	cpd00067	53.95	11.4524	53.95	53.95	53.95	59.81	53.95	105	29.9976	H+	proton
h2o	c	cpd00001	-48.6015	-6.11183	-48.6015	-48.6015	-48.6015	-54.462	-48.6015	-105	-30	H2O	water
h4spt	c	cpd15884									-0.02362	Tetrahydrosarcinapterin	cofactor
his__L	c	cpd00119	-0.094738	-0.0598	-0.094738	-0.094738	-0.094738	-0.09474	-0.094738	-0.081739	-0.1037	L-Histidine	protein
hspmd	c	cpd03802									-0.0047	Sym-Homospermidine
ile__L	c	cpd00322	-0.290529	-0.47	-0.290529	-0.290529	-0.290529	-0.2905	-0.290529	-0.269905	-0.3179	L-Isoleucine	protein
k	c	cpd00205	-0.195193	-0.7063	-0.195193	-0.195193	-0.195193	-0.1776	-0.195193	-0.706312		Potassium	cofactor
kdo2lipid4	p	cpd03586				-0.019456						KDO(2)-lipid IV(A)	lipid
kdo2lipid4	e	cpd03586						-0.01945	-0.019456			KDO(2)-lipid IV(A)	lipid
leu__L	c	cpd00107	-0.450531	-0.4744	-0.450531	-0.450531	-0.450531	-0.4505	-0.450531	-0.346445	-0.493	L-Leucine	protein
lipo1_24_BS	c	cpd11445			-5e-05					-7e-06		Lipoteichoic acid n24 linked glucose substituted C26236H47072O25500P2400
lipo2_24_BS	c	cpd11446			-5e-05					-6e-06		Lipoteichoic acid n24 linked N acetyl D glucosamine C31036H54272N2400O25500P2400
lipo3_24_BS	c	cpd11447			-5e-05					-1.8e-05		Lipoteichoic acid n24 linked D alanine substituted C19036H39872N2400O18300P2400
lipo4_24_BS	c	cpd11448			-5e-05					-1.5e-05		Lipoteichoic acid n24 linked unsubstituted C11836H23072O13500P2400
lys__L	c	cpd00039	-0.343161	-0.5137	-0.343161	-0.343161	-0.343161	-0.3432	-0.343161	-0.323093	-0.3755	L-Lysine	protein
met__L	c	cpd00060	-0.153686	-0.0604	-0.153686	-0.153686	-0.153686	-0.1537	-0.153686	-0.113326	-0.1682	L-Methionine	protein
mg2	c	cpd00254	-0.008675	-0.1017	-0.008675	-0.008675	-0.008675	-0.007895	-0.008675	-0.101714		Magnesium	cofactor
mlthf	c	cpd00125	-0.000223	-0.0002	-0.000223	-0.000223	-0.000223	-0.000223	-0.000223			5,10-Methylenetetrahydrofolate	cofactor
mn2	c	cpd00030	-0.000691	-0.0032	-0.000691	-0.000691	-0.000691	-0.003158	-0.000691			Mn2+	cofactor
mobd	c	cpd11574		-0.0032				-0.003158	-7e-06			Molybdate
mql7	c	cpd11451								-0.000266		Menaquinol 7 C46H66O2
mql8	c	cpd15499	-0.0001		-0.0001	-0.0001	-0.0001					Menaquinol 8	vitamin K2
murein5px4p	p	cpd15514				-0.013894		-0.01389	-0.013894			Two disacharide linked murein units, pentapeptide crosslinked tetrapeptide (A2pm->D-ala) (middle of chain)
nad	c	cpd00003	-0.001831	-0.0162	-0.001831	-0.001831	-0.001831	-0.001831	-0.001831	-0.016164	-0.00215	NAD	cofactor
nadh	c	cpd00004									-5e-05	Nicotinamide adenine dinucleotide - reduced
nadp	c	cpd00006	-0.000447	-0.0009	-0.000447	-0.000447	-0.000447	-0.000447	-0.000447	-0.000934	-0.00013	NADP	cofactor
nadph	c	cpd00005								-0.000216	-0.0004	NAPDH	cofactor
nh4	c	cpd00013		-0.0118				-0.011843	-0.013013			Ammonium	nitrogen source
ni2	c	cpd20862							-0.000323			Nickel
pe160	c	cpd15531				-0.017868		-0.02233	-0.017868			Phosphatidylethanolamine (dihexadecanoyl, n-C16:0)
pe160	p	cpd15531				-0.045946		-0.04148	-0.045946			Phosphatidylethanolamine (dihexadecanoyl, n-C16:0)
pe161	c	cpd29055				-0.054154		-0.02632	-0.054154			Phosphatidylethanolamine (dihexadec-9enoyl, n-C16:1)
pe161	p	cpd29055				-0.02106		-0.04889	-0.02106			Phosphatidylethanolamine (dihexadec-9enoyl, n-C16:1)
peptido_BS	c	cpd15665			-0.01					-0.101817		Peptidoglycan_polymer_n_subunits	cellwall
pgly_BS	c	cpd11453		-0.0059						-0.000176		Phosphatidylglycerol B subtils C3736H7272O1000P100
phe__L	c	cpd00066	-0.185265	-0.3281	-0.185265	-0.185265	-0.185265	-0.1759	-0.185265	-0.175939	-0.2027	L-Phenylalanine	protein
pheme	c	cpd00028				-0.000223		-0.000223	-0.000223			Protoheme	cofactor
pi	c	cpd00009	53.9457	11.4668	53.9457	53.9457	53.9457	59.806	53.9457	104.986	30	Phosphate	cofactor
ppi	c	cpd00012	0.773903	0.571202	0.773903	0.773903	0.773903	0.7739	0.773903	-0.000918	0.799	Diphosphate
pro__L	c	cpd00129	-0.221055	-0.1428	-0.221055	-0.221055	-0.221055	-0.2211	-0.221055	-0.160642	-0.2419	L-Proline	protein
psetha_BS	c	cpd29688								-0.00056		Phosphatidylethanolamine B subtilis C3636H7172N100O800P100
ptrc	c	cpd00118		-0.035							-0.0262	Putrescine
pydx5p	c	cpd00016	-0.000223	-0.0002	-0.000223	-0.000223	-0.000223	-0.000223	-0.000223			Pyridoxal 5'-phosphate	cofactor
ribflv	c	cpd00220	-0.000223	-0.0002	-0.000223	-0.000223	-0.000223	-0.000223	-0.000223			Riboflavin	cofactor
ser__L	c	cpd00054	-0.215792	-0.3397	-0.215792	-0.215792	-0.215792	-0.2158	-0.215792	-0.216213	-0.2361	L-Serine	protein
sheme	c	cpd00557				-0.000223		-0.000223	-0.000223			Siroheme	cofactor
so4	c	cpd00048	-0.004338	-0.0039	-0.004338	-0.004338	-0.004338	-0.003948	-0.004338			Sulfate	cofactor
succoa	c	cpd00078									-3e-06	Succinyl-CoA
t12dg_BS	c	cpd11458								-6.6e-05		Triglucosyl 1 2 diacylglycerol C5236H9672O2000
tcam_BS	c	cpd11459								-0.003112		Minor teichoic acid acetylgalactosamine glucose phosphate n30 C420H750N30O420P30	cellwall
thf	c	cpd00087	-0.000223	-0.0002	-0.000223	-0.000223	-0.000223	-0.000223	-0.000223		-6.1e-05	Tetrahydrofolate	cofactor
thmpp	c	cpd00056	-0.000223	-0.0002	-0.000223	-0.000223	-0.000223	-0.000223	-0.000223			Thiamine diphosphate	cofactor
thr__L	c	cpd00161	-0.253687	-0.2198	-0.253687	-0.253687	-0.253687	-0.2537	-0.253687	-0.186317	-0.2776	L-Threonine	protein
trp__L	c	cpd00065	-0.056843	-0.0475	-0.056843	-0.056843	-0.056843	-0.05684	-0.056843	-0.054336	-0.0622	L-Tryptophan	protein
tyr__L	c	cpd00069	-0.137896	-0.1768	-0.137896	-0.137896	-0.137896	-0.1379	-0.137896	-0.110824	-0.1509	L-Tyrosine	protein
uaagmda	c	cpd03495	-0.1									Undecaprenyl-diphospho-N-acetylmuramoyl-(N-acetylglucosamine)-L-alanyl-D-glutamyl-meso-2,6-diaminopimeloyl-D-alanyl-D-alanine	Most common precursor for peptidoglycans
udcpdp	c	cpd25775						-5.5e-05	-5.5e-05			Undecaprenyl diphosphate
utp	c	cpd00062	-0.144104	-0.1239	-0.144104	-0.144104	-0.144104	-0.1441	-0.144104	-0.041501	-0.1489	UTP	rna
val__L	c	cpd00156	-0.423162	-0.2306	-0.423162	-0.423162	-0.423162	-0.4232	-0.423162	-0.306734	-0.4631	L-Valine	protein
zn2	c	cpd00034	-0.000341	-0.0032	-0.000341	-0.000341	-0.000341	-0.003158	-0.000341			Zinc	cofactor
