# Supplementary material for: Exploring the pangenome of Mycoplasma hyorhinis in search of potential virulence markers
Source: Research Square preprint supplement (doi:10.21203/rs.3.rs-7195312/v1), 2025-08-22
Supplement: Supplementary file 2 [file 61735f3078062966c5ec2655.xlsx]

## Sheet: metadata
Supplementary table 1. Strains included in the study: strain name, NCBI ID, isolation-site, body-site, country and date (collection-date) of isolation and the associated host health status .
strain	NCBI ID	isolation-site	body-site	country	M hyorhinis associated disease	collection-date	Number of genes	Number of shared genes	Included in the final pangenome
101-8	SAMN49541549	Systemic organ	Pericardium	Spain	Diseased	2022	678	632.85	yes
103-2.c1	SAMN49541550	Nasal cavity	Nasal cavity	Spain	Healthy	2023	669	620.24	yes
103-2.c2	SAMN49541551	Nasal cavity	Nasal cavity	Spain	Healthy	2023	669	623.54	yes
104-2	SAMN49541552	Systemic organ	Pleura	Spain	Diseased	2023	685	635.58	yes
107-1	SAMN49541553	Nasal cavity	Nasal cavity	Spain	Healthy	2023	692	639.05	yes
107-5.c1	SAMN49541554	Nasal cavity	Nasal cavity	Spain	Healthy	2023	719	608.95	yes
107-5.c2	SAMN49541555	Nasal cavity	Nasal cavity	Spain	Healthy	2023	699	638.35	yes
109-2.c2	SAMN49541556	Nasal cavity	Nasal cavity	Spain	Healthy	2023	701	628.25	yes
61-2	SAMN49541557	Systemic organ	Joint	Spain	Diseased	2019	674	638.26	yes
62-1	SAMN49541558	Systemic organ	Peritoneum	Spain	Diseased	2019	666	638.07	yes
74-2	SAMN49541559	Systemic organ	Joint	Spain	Diseased	2020	663	637.1	yes
82-1	SAMN49541560	Nasal cavity	Nasal cavity	Spain	Healthy	2020	672	641.65	yes
82-2	SAMN49541561	Nasal cavity	Nasal cavity	Spain	Healthy	2020	671	638.21	yes
82-3	SAMN49541562	Nasal cavity	Nasal cavity	Spain	Healthy	2020	686	641.95	yes
82-6	SAMN49541563	Nasal cavity	Nasal cavity	Spain	Healthy	2020	675	640.87	yes
83-1	SAMN49541564	Systemic organ	Pleura	Spain	Diseased	2021	672	639.13	yes
83-4	SAMN49541565	Systemic organ	Pericardium	Spain	Diseased	2021	694	638.55	yes
4236J19c	GCA_024760345.1	Systemic organ	Joint	Austria	Diseased	2019	665	642.45	yes
4453J21c	GCA_024760365.1	Systemic organ	Joint	Austria	Diseased	2021	654	636.42	yes
4455N20c	GCA_024760385.1	Nasal cavity	Nasal cavity	Austria	Diseased	2020	654	636.42	yes
N36N21c	GCA_024760405.1	Nasal cavity	Nasal cavity	Austria	Unknown	2021	652	628.74	yes
HUB-1	GCF_000145705.1	Lung	Lung	China	Unknown	2010	653	632.97	yes
SK76	GCF_000313635.1	Systemic organ	Joint	USA	Diseased	1973	657	636.84	yes
BTS7	GCF_000383515.1	Nasal cavity	Nasal cavity	USA	Unknown	1953	660	636.56	yes
JF5820	GCF_007924005.1	Lung	Lung	Switzerland	Unknown	2015	651	634.47	yes
MHR380	GCF_009831505.1	Lung	Lung	France	Unknown	2016	674	644.7	yes
MHR429	GCF_009831745.1	Lung	Lung	France	Unknown	2016	675	632.68	yes
MHR404	GCF_009831775.1	Lung	Lung	France	Unknown	2016	671	642.95	yes
MHR400	GCF_009831845.1	Lung	Lung	France	Unknown	2016	680	645.97	yes
MHR389	GCF_009831885.1	Lung	Lung	France	Unknown	2016	672	643.13	yes
MHR386	GCF_009831975.1	Lung	Lung	France	Unknown	2016	679	644.65	yes
MHR383	GCF_009832005.1	Lung	Lung	France	Unknown	2016	676	645	yes
MHR381	GCF_009832065.1	Lung	Lung	France	Unknown	2016	679	645.47	yes
2731J16	GCF_018791005.1	Systemic organ	Joint	Austria	Diseased	2016	654	636.37	yes
2731N20	GCF_018791045.1	Nasal cavity	Nasal cavity	Austria	Diseased	2020	651	631.73	yes
2730L16	GCF_018791065.1	Lung	Lung	Austria	Unknown	2016	668	640.3	yes
2731B16	GCF_018791085.1	Systemic organ	Brain	Austria	Diseased	2016	643	621.34	yes
2119L15	GCF_018791095.1	Lung	Lung	Austria	Unknown	2015	649	629.41	yes
2089L18	GCF_018791125.1	Lung	Lung	Austria	Unknown	2018	675	646.15	yes
2697L17	GCF_018791135.1	Lung	Lung	Austria	Unknown	2017	654	634.56	yes
530L18	GCF_018791905.1	Lung	Lung	Austria	Unknown	2018	652	633.35	yes
893L18	GCF_018791945.1	Lung	Lung	Austria	Unknown	2018	655	637.91	yes
769L18	GCF_018791975.1	Lung	Lung	Austria	Unknown	2018	661	639.91	yes
614N20	GCF_018791985.1	Nasal cavity	Nasal cavity	Austria	Diseased	2020	655	632.04	yes
450N20	GCF_018792045.1	Nasal cavity	Nasal cavity	Austria	Diseased	2020	651	634.04	yes
425L09	GCF_018792065.1	Lung	Lung	Austria	Unknown	2009	644	631.42	yes
1145J17	GCF_018792085.1	Systemic organ	Joint	Austria	Diseased	2017	661	636.35	yes
614L17	GCF_018792095.1	Lung	Lung	Austria	Diseased	2017	658	631.62	yes
614B17	GCF_018792125.1	Systemic organ	Brain	Austria	Diseased	2017	662	638.55	yes
450S20	GCF_018792145.1	Systemic organ	Serosa	Austria	Diseased	2020	648	629.33	yes
425N20	GCF_018792165.1	Nasal cavity	Nasal cavity	Austria	Unknown	2020	651	619.27	yes
1316L20	GCF_018792185.1	Lung	Lung	Austria	Unknown	2020	652	629.44	yes
450L20	GCF_018792205.1	Lung	Lung	Austria	Diseased	2020	651	632.51	yes
922L17	GCF_018792225.1	Lung	Lung	Austria	Unknown	2017	663	639.85	yes
1124L18	GCF_018792235.1	Lung	Lung	Austria	Unknown	2018	661	639.15	yes
1165L18	GCF_018792265.1	Lung	Lung	Austria	Diseased	2018	649	629.78	yes
424N20	GCF_018792285.1	Nasal cavity	Nasal cavity	Austria	Unknown	2020	668	636.37	yes
1713L16	GCF_018792295.1	Lung	Lung	Austria	Unknown	2016	658	627.35	yes
1474S18	GCF_018792325.1	Systemic organ	Serosa	Austria	Diseased	2018	654	631.57	yes
1425_15E20	GCF_018792335.1	Systemic organ	Eye	Austria	Diseased	2020	677	638.21	yes
1689L17	GCF_018792365.1	Lung	Lung	Austria	Unknown	2017	648	631.45	yes
1538L18	GCF_018792385.1	Lung	Lung	Austria	Unknown	2018	658	638.22	yes
1606S14	GCF_018792395.1	Systemic organ	Serosa	Austria	Diseased	2014	671	633.09	yes
614S17	GCF_018792425.1	Systemic organ	Serosa	Austria	Diseased	2017	657	637	yes
1308L20	GCF_018792435.1	Lung	Lung	Austria	Unknown	2020	655	633.65	yes
1127L17	GCF_018792465.1	Lung	Lung	Austria	Unknown	2017	653	631.44	yes
1165S18	GCF_018792475.1	Systemic organ	Serosa	Austria	Diseased	2018	653	635.75	yes
1423L18	GCF_018792505.1	Lung	Lung	Austria	Unknown	2018	657	634.25	yes
1366N18	GCF_018792525.1	Nasal cavity	Nasal cavity	Austria	Unknown	2018	652	633.86	yes
560N15	GCF_018792545.1	Nasal cavity	Nasal cavity	Austria	Unknown	2015	669	644.45	yes
1366L18	GCF_018792565.1	Lung	Lung	Austria	Unknown	2018	651	632.55	yes
1237_9N19	GCF_018792585.1	Nasal cavity	Nasal cavity	Austria	Unknown	2019	657	633.34	yes
1237L19	GCF_018792605.1	Lung	Lung	Austria	Unknown	2019	654	634.67	yes
1209J18	GCF_018792625.1	Systemic organ	Joint	Austria	Diseased	2018	655	635.97	yes
09993L10	GCF_018792645.1	Lung	Lung	Germany	Unknown	2010	657	636.16	yes
570L17	GCF_018792665.1	Lung	Lung	Austria	Unknown	2017	665	639.41	yes
222_3S20	GCF_018792675.1	Systemic organ	Serosa	Austria	Diseased	2020	654	634.21	yes
893S18	GCF_018792685.1	Systemic organ	Serosa	Austria	Diseased	2018	656	635.87	yes
289S20	GCF_018792725.1	Systemic organ	Serosa	Austria	Diseased	2020	668	625.8	yes
30S20	GCF_018792745.1	Systemic organ	Serosa	Austria	Diseased	2020	658	628.67	yes
87_4N17	GCF_018792755.1	Nasal cavity	Nasal cavity	Austria	Unknown	2017	656	636.33	yes
135S19	GCF_018792785.2	Systemic organ	Serosa	Austria	Diseased	2019	650	634.57	yes
135L19	GCF_018792795.1	Lung	Lung	Austria	Diseased	2019	663	637.41	yes
180038801N18	GCF_018792825.1	Nasal cavity	Nasal cavity	Germany	Unknown	2018	662	639.63	yes
3416L18	GCF_018792845.1	Lung	Lung	Austria	Unknown	2018	649	629.51	yes
4236J19	GCF_018792865.1	Systemic organ	Joint	Austria	Diseased	2019	666	643.73	yes
14S14	GCF_018792885.1	Systemic organ	Serosa	Austria	Diseased	2014	667	642.6	yes
SLP75N20	GCF_018792905.1	Nasal cavity	Nasal cavity	Austria	Unknown	2020	660	639.07	yes
BB11N20	GCF_018792915.1	Nasal cavity	Nasal cavity	Austria	Unknown	2020	664	634	yes
4455N20	GCF_018792945.1	Nasal cavity	Nasal cavity	Austria	Diseased	2020	654	630.75	yes
4184_3618S17	GCF_018792965.1	Systemic organ	Serosa	Austria	Diseased	2017	654	638.83	yes
4631S19	GCF_018792985.1	Systemic organ	Serosa	Austria	Diseased	2019	656	635.56	yes
4541L18	GCF_018793005.1	Lung	Lung	Austria	Unknown	2018	655	628.1	yes
4455L19	GCF_018793025.1	Lung	Lung	Austria	Diseased	2019	662	641.63	yes
SVT87N20	GCF_018793045.1	Nasal cavity	Nasal cavity	Austria	Unknown	2020	679	641.22	yes
3933N18	GCF_018793065.1	Nasal cavity	Nasal cavity	Austria	Unknown	2018	657	637.06	yes
3417L18	GCF_018793085.1	Lung	Lung	Austria	Unknown	2018	650	629.37	yes
4453B19	GCF_018793095.1	Systemic organ	Brain	Austria	Diseased	2019	654	632	yes
3775L17	GCF_018793125.1	Lung	Lung	Austria	Unknown	2017	663	640.3	yes
3779L17	GCF_018793145.1	Lung	Lung	Austria	Unknown	2017	651	630.96	yes
3565L16	GCF_018793165.1	Lung	Lung	Austria	Unknown	2016	658	629.48	yes
3414S17	GCF_018793175.1	Systemic organ	Serosa	Austria	Diseased	2017	653	631.36	yes
3414L17	GCF_018793205.1	Lung	Lung	Austria	Diseased	2017	651	629.66	yes
2731S16	GCF_018793225.1	Systemic organ	Serosa	Austria	Diseased	2016	650	634.58	yes
3414J17	GCF_018793245.1	Systemic organ	Joint	Austria	Diseased	2017	662	634.06	yes
3051S16	GCF_018793265.1	Systemic organ	Serosa	Austria	Diseased	2016	672	646.75	yes
3051N20	GCF_018793285.1	Nasal cavity	Nasal cavity	Austria	Diseased	2020	668	645.63	yes
3051L16	GCF_018793295.1	Lung	Lung	Austria	Diseased	2016	660	636.42	yes
NCTC10130	GCF_900476065.1	Nasal cavity	Nasal cavity	Unknown	Unknown	1970	656	636.81	yes
RM5-5	SAMN49541566	Systemic organ	Joint	Spain	Diseased	2016	678	641.54	yes
IMT49388	GCA_015476215.1	Cell culture	Cell culture	Germany	NA	2020	NA	NA	no
MCLD	GCF_000211295.1	Cell culture	Cell culture	Israel	NA	NA	NA	NA	no
GDL-1	GCF_000241125.1	Cell culture	Cell culture	USA	NA	NA	NA	NA	no
DBS 1050	GCF_000496815.1	Cell culture	Cell culture	USA	NA	2012	NA	NA	no
MDBK-IPV	GCF_001705605.1	Cell culture	Cell culture	Brazil	NA	2014	NA	NA	no
MHR394	GCF_009831795.1	Lung	Lung	France	Unknown	2016	NA	NA	no
NCTC10121	GCF_900660475.1	Cell culture	Cell culture	NA	NA	1968	NA	NA	no
