# Supplementary material for: Exploring the pangenome of Mycoplasma hyorhinis in search of potential virulence markers
Source: Research Square preprint supplement (doi:10.21203/rs.3.rs-7195312/v1), 2025-08-22
Supplement: Supplementary file 3 [file d49c0c7dbd154c820d9d66f2.xlsx]

## Sheet: Supp table 2A
Supplementary table 2A. Comparative analysis of putative virulence factors using Uniprot annotation of the pangenome. Frequency differences are highlighted in green (if more prevalence in strains from healthy animals was detected) and red (if more prevalence in strains from diseased animals was detected).
		PREVALENCE (RELATIVE FREQUENCY)	(RELATIVE)					FREQUENCY DIFFERENCE				ANNOTATION
GEN	CATEGORY	SYSTEMIC / THIS STUDY	SYSTEMIC / OTHER STUDIES	LUNG	NASAL / THIS STUDY	NASAL / OTHER STUDIES	SYSTEMIC (COMBINED)	NASAL THIS STUDY VS ALL SYSTEMIC	NASAL OTHER STUDIES VS ALL SYSTEMIC	LUNG VS ALL SYSTEMIC	NASAL OTHER STUDIES VS LUNG	DESCRIPTION	ENZYME	GO(P)ID	GO(P)NAME	GO(F)ID	GO(F)NAME	GO(C)ID	GO(C)NAME	KEYWORD	PATHWAY
gap	Adhesion	1	1	1	1	1	1	0	0	0	0	Glyceraldehyde-3-phosphate dehydrogenase	1.2.1.-;1.2.1.12	GO:0006006;GO:0006735;GO:0044650	glucose metabolic process;NADH regeneration;adhesion of symbiont to host cell	GO:0004365;GO:0140032;GO:0016620;GO:0051287;GO:0050661	glyceraldehyde-3-phosphate dehydrogenase (NAD+) (phosphorylating) activity;glycosylation-dependent protein binding;oxidoreductase activity, acting on the aldehyde or oxo group of donors, NAD or NADP as acceptor;NAD binding;NADP binding			Nucleotide-binding;NAD;Receptor;Oxidoreductase	Carbohydrate degradation
p115	Cell-migration	1	1	1	1	1	1	0	0	0	0	Chromosome partition protein Smc		GO:0051491;GO:0007062;GO:0030261;GO:0008284;GO:0001934;GO:0051276;GO:0030335;GO:0006260;GO:1902745;GO:0007059;GO:0051497	positive regulation of filopodium assembly;sister chromatid cohesion;chromosome condensation;positive regulation of cell population proliferation;positive regulation of protein phosphorylation;chromosome organization;positive regulation of cell migration;DNA replication;positive regulation of lamellipodium organization;chromosome segregation;negative regulation of stress fiber assembly	GO:0005524;GO:0016887;GO:0003677	ATP binding;ATP hydrolysis activity;DNA binding	GO:0005694;GO:0005737	chromosome;cytoplasm	ATP-binding;DNA-binding;Coiled coil;Cytoplasm;Nucleotide-binding;Plasmid
p37	Cell-migration	1	1	1	1	1	1	0	0	0	0	High affinity transport system protein		GO:0001932;GO:0030334	regulation of protein phosphorylation;regulation of cell migration			GO:0030430	host cell cytoplasm	Lipoprotein;Palmitate;Signal;Transport
MOS_058	Competence protein	1	1	1	1	1	1	0	0	0	0	Late competence protein ComEA, DNA receptor						GO:0016020	membrane	Transmembrane helix;Membrane;Transmembrane
MHR_0016	Effector protein	0.25	0	0	0.5	0	0.0555556	0.444444	-0.0555556	-0.0555556	0	SMODS and SLOG-associating 2TM effector domain-containing protein						GO:0016020	membrane	Membrane;Transmembrane;Transmembrane helix
MHR_0016__2	Effector protein	1	1	1	0.9	1	1	-0.1	0	0	0	SMODS and SLOG-associating 2TM effector domain-containing protein						GO:0016020	membrane	Membrane;Transmembrane;Transmembrane helix
unknown7	Exoenzyme	1	1	1	1	1	1	0	0	0	0	Exonuclease				GO:0004527	exonuclease activity			Hydrolase;Exonuclease;Nuclease;Plasmid
CYT24_09070	Exoenzyme	0.375	0.571429	0.355556	0.1	0.421053	0.527778	-0.427778	-0.106725	-0.172222	0.0654971	Helicase	3.1.11.5;3.6.4.12			GO:0003678;GO:0004527;GO:0008854;GO:0004386	DNA helicase activity;exonuclease activity;exodeoxyribonuclease V activity;helicase activity			Hydrolase;ATP-binding;Helicase;Nuclease;Exonuclease;Nucleotide-binding
recD	Exoenzyme	0.5	0.107143	0.155556	0.9	0.210526	0.194444	0.705556	0.0160819	-0.0388889	0.0549708	Helicase	3.1.11.5;3.6.4.12			GO:0003678;GO:0004386;GO:0004527;GO:0005524;GO:0008854	DNA helicase activity;helicase activity;exonuclease activity;ATP binding;exodeoxyribonuclease V activity			ATP-binding;Exonuclease;Helicase;Hydrolase;Nuclease;Nucleotide-binding
rnj	Exoenzyme	1	1	1	1	1	1	0	0	0	0	Ribonuclease J	3.1.-.-	GO:0006396;GO:0006364	RNA processing;rRNA processing	GO:0003723;GO:0046872;GO:0004534;GO:0004527;GO:0008270;GO:0004521	RNA binding;metal ion binding;5'-3' RNA exonuclease activity;exonuclease activity;zinc ion binding;RNA endonuclease activity	GO:0005737	cytoplasm	Nuclease;Exonuclease;rRNA processing;Metal-binding;Endonuclease;RNA-binding;Cytoplasm;Hydrolase;Zinc
rnr	Exoenzyme	1	1	1	1	1	1	0	0	0	0	Ribonuclease R	3.1.13.1			GO:0008859;GO:0003723	exoribonuclease II activity;RNA binding	GO:0005737	cytoplasm	Hydrolase;Cytoplasm;RNA-binding;Coiled coil;Nuclease;Exonuclease
polA	Exoenzyme	1	1	0.977778	1	1	1	0	0	-0.0222222	0.0222222	DNA polymerase I	3.1.11.-;2.7.7.7	GO:0033567	DNA replication, Okazaki fragment processing	GO:0017108;GO:0003887;GO:0004527;GO:0003677	5'-flap endonuclease activity;DNA-directed DNA polymerase activity;exonuclease activity;DNA binding			Hydrolase;Transferase;DNA-binding;DNA-directed DNA polymerase;Exonuclease;Nuclease;Signal;Nucleotidyltransferase
dnaE	Exoenzyme	1	1	1	1	1	1	0	0	0	0	DNA-directed DNA polymerase	2.7.7.7	GO:0006260	DNA replication	GO:0003887;GO:0008408	DNA-directed DNA polymerase activity;3'-5' exonuclease activity			DNA replication;DNA-directed DNA polymerase;Nucleotidyltransferase;Transferase
polC	Exoenzyme	1	1	1	1	1	1	0	0	0	0	DNA polymerase III PolC-type	2.7.7.7	GO:0006261	DNA-templated DNA replication	GO:0008408;GO:0003677;GO:0003887	3'-5' exonuclease activity;DNA binding;DNA-directed DNA polymerase activity	GO:0005737	cytoplasm	DNA replication;Hydrolase;Cytoplasm;Nucleotidyltransferase;Nuclease;Exonuclease;DNA-directed DNA polymerase;Transferase
dnaN	Exoenzyme	1	1	1	1	1	1	0	0	0	0	DNA polymerase III beta subunit		GO:0006260	DNA replication	GO:0003677;GO:0003887;GO:0008408	DNA binding;DNA-directed DNA polymerase activity;3'-5' exonuclease activity	GO:0005737;GO:0009360	cytoplasm;DNA polymerase III complex	Cytoplasm;DNA replication;DNA-binding;DNA-directed DNA polymerase;Nucleotidyltransferase;Transferase
mgpA	Exoenzyme	1	1	1	1	1	1	0	0	0	0	Mgpa-like protein	3.1.3.7;3.1.-.-			GO:0003676;GO:0016787;GO:0008441	nucleic acid binding;hydrolase activity;3'(2'),5'-bisphosphate nucleotidase activity			Plasmid;Exonuclease;Hydrolase
mgpA__2	Exoenzyme	1	1	1	1	1	1	0	0	0	0	Bifunctional oligoribonuclease/PAP phosphatase NrnA	3.1.-.-;3.1.3.7			GO:0003676;GO:0004527;GO:0008441;GO:0016787	nucleic acid binding;exonuclease activity;3'(2'),5'-bisphosphate nucleotidase activity;hydrolase activity			Exonuclease;Hydrolase;Nuclease;Plasmid
rnjA	Exoenzyme	1	1	1	1	1	1	0	0	0	0	Hydrolase	3.1.-.-			GO:0003723;GO:0016787;GO:0004527	RNA binding;hydrolase activity;exonuclease activity			Hydrolase;Plasmid;Exonuclease;Nuclease;RNA-binding
dnaX	Exoenzyme	1	1	1	1	1	1	0	0	0	0	DNA polymerase III subunit gamma/tau	2.7.7.7	GO:0006260	DNA replication	GO:0005524;GO:0008408;GO:0003677;GO:0003887	ATP binding;3'-5' exonuclease activity;DNA binding;DNA-directed DNA polymerase activity	GO:0009360	DNA polymerase III complex	Transferase;DNA-directed DNA polymerase;Nucleotidyltransferase;Nucleotide-binding;DNA replication;Coiled coil;ATP-binding
mnuA	Exoenzyme	1	0.964286	1	1	1	0.972222	0.0277778	0.0277778	0.0277778	0	Membrane nuclease, lipoprotein				GO:0004519;GO:0004527	endonuclease activity;exonuclease activity			Signal;Nuclease;Exonuclease;Lipoprotein;Endonuclease
mnuA__2	Exoenzyme	1	1	0.977778	1	1	1	0	0	-0.0222222	0.0222222	Membrane nuclease, lipoprotein				GO:0004519;GO:0004527	endonuclease activity;exonuclease activity			Endonuclease;Exonuclease;Lipoprotein;Nuclease;Signal
mnuA__3	Exoenzyme	0	0.178571	0.0222222	0	0.105263	0.138889	-0.138889	-0.0336257	-0.116667	0.0830409	Membrane nuclease, lipoprotein				GO:0004519;GO:0004527	endonuclease activity;exonuclease activity			Endonuclease;Exonuclease;Lipoprotein;Nuclease;Signal
recD2_5	Exoenzyme	0	0.0357143	0.0444444	0	0	0.0277778	-0.0277778	-0.0277778	0.0166667	-0.0444444	ATP-dependent RecD-like DNA helicase	3.6.4.12			GO:0004386	helicase activity			ATP-binding;Hydrolase;Helicase;Exonuclease;Nucleotide-binding
pepP	Exoenzyme	1	1	1	1	1	1	0	0	0	0	Xaa-pro aminopeptidase	3.4.-.-;3.4.11.-;3.4.11.9;3.4.13.9			GO:0046914;GO:0102009;GO:0008235;GO:0004177	transition metal ion binding;proline dipeptidase activity;metalloexopeptidase activity;aminopeptidase activity			Aminopeptidase;Hydrolase;Metal-binding;Dipeptidase;Protease
pepF	Exoenzyme	1	1	1	1	1	1	0	0	0	0	Oligoendopeptidase F	3.4.24.-	GO:0006508	proteolysis	GO:0004222;GO:0046872	metalloendopeptidase activity;metal ion binding	GO:0016020	membrane	Membrane;Hydrolase;Metalloprotease;Transmembrane helix;Zinc;Metal-binding;Protease;Transmembrane
ftsH	Exoenzyme	1	1	1	1	1	1	0	0	0	0	ATP-dependent zinc metalloprotease FtsH	3.4.24.-	GO:0006353;GO:0006508;GO:0030163;GO:0051301	DNA-templated transcription termination;proteolysis;protein catabolic process;cell division	GO:0004176;GO:0004222;GO:0005524;GO:0008237;GO:0008270;GO:0016887	ATP-dependent peptidase activity;metalloendopeptidase activity;ATP binding;metallopeptidase activity;zinc ion binding;ATP hydrolysis activity	GO:0005886	plasma membrane	ATP-binding;Cell cycle;Cell division;Cell membrane;Hydrolase;Metal-binding;Metalloprotease;Nucleotide-binding;Protease;Zinc
qmcA	Exoenzyme	1	1	1	1	1	1	0	0	0	0	Membrane protease subunits, stomatin/prohibitin-like protein		GO:0006508	proteolysis	GO:0008233	peptidase activity	GO:0110165;GO:0016020	cellular anatomical entity;membrane	Plasmid;Transmembrane;Protease;Coiled coil;Hydrolase;Membrane;Transmembrane helix
lspA	Exoenzyme	1	1	1	0.9	1	1	-0.1	0	0	0	Signal peptidase II	3.4.23.36	GO:0006508	proteolysis	GO:0004190	aspartic-type endopeptidase activity	GO:0005886	plasma membrane	Lipoprotein;Cell membrane;Aspartyl protease;Transmembrane helix;Hydrolase;Membrane;Transmembrane;Protease
MHJ_0398	Exoenzyme	1	0.964286	0.955556	1	0.947368	0.972222	0.0277778	-0.0248538	-0.0166667	-0.00818713	Subtilisin-like serine protease		GO:0006508	proteolysis	GO:0004252	serine-type endopeptidase activity	GO:0016020	membrane	Hydrolase;Membrane;Protease;Transmembrane;Transmembrane helix
MHJ_0398__2	Exoenzyme	0.875	0.928571	0.822222	1	0.894737	0.916667	0.0833333	-0.0219298	-0.0944444	0.0725146	Subtilisin-like serine protease		GO:0006508	proteolysis	GO:0004252	serine-type endopeptidase activity	GO:0016020	membrane	Hydrolase;Membrane;Protease;Transmembrane;Transmembrane helix
MHR_0354	Exoenzyme	1	1	1	1	1	1	0	0	0	0	Phospholipid-binding protein		GO:0016310	phosphorylation	GO:0016301	kinase activity	GO:0016020	membrane	Transmembrane;Kinase;Transmembrane helix;Membrane
dppD	Exoenzyme	1	1	1	1	1	1	0	0	0	0	ABC transporter ATP-binding protein	2.7.2.3;3.6.1.3;3.6.3.-	GO:0015833	peptide transport	GO:0004618;GO:0005524;GO:0016887;GO:0022857	phosphoglycerate kinase activity;ATP binding;ATP hydrolysis activity;transmembrane transporter activity			ATP-binding;Nucleotide-binding
fruA	Exoenzyme	1	1	1	1	1	1	0	0	0	0	Fructose permease IIC component	2.7.1.202;2.7.1.69	GO:0009401	phosphoenolpyruvate-dependent sugar phosphotransferase system	GO:0103111;GO:0016301;GO:0005351;GO:0090563;GO:0022877	D-glucosamine PTS permease activity;kinase activity;carbohydrate;protein-phosphocysteine-sugar phosphotransferase activity;protein-N(PI)-phosphohistidine-fructose phosphotransferase system transporter activity	GO:0005886	plasma membrane	Transmembrane helix;Membrane;Cell membrane;Transport;Transferase;Sugar transport;Transmembrane;Phosphoprotein;Phosphotransferase system
MHR_0285	Helicase	1	1	1	1	1	1	0	0	0	0	DUF31 domain-containing protein				GO:0003723;GO:0003724;GO:0005524	RNA binding;RNA helicase activity;ATP binding	GO:0016020	membrane	Membrane;Signal;Transmembrane;Transmembrane helix
CYT24_09070	Helicase	0.375	0.571429	0.355556	0.1	0.421053	0.527778	-0.427778	-0.106725	-0.172222	0.0654971	Helicase	3.1.11.5;3.6.4.12			GO:0003678;GO:0004527;GO:0008854;GO:0004386	DNA helicase activity;exonuclease activity;exodeoxyribonuclease V activity;helicase activity			Hydrolase;ATP-binding;Helicase;Nuclease;Exonuclease;Nucleotide-binding
recD	Helicase	0.5	0.107143	0.155556	0.9	0.210526	0.194444	0.705556	0.0160819	-0.0388889	0.0549708	Helicase	3.1.11.5;3.6.4.12			GO:0003678;GO:0004386;GO:0004527;GO:0005524;GO:0008854	DNA helicase activity;helicase activity;exonuclease activity;ATP binding;exodeoxyribonuclease V activity			ATP-binding;Exonuclease;Helicase;Hydrolase;Nuclease;Nucleotide-binding
rnhB	Helicase	1	1	1	1	1	1	0	0	0	0	Ribonuclease	3.1.26.4	GO:0006401	RNA catabolic process	GO:0003723;GO:0004386;GO:0004523;GO:0046872	RNA binding;helicase activity;RNA-DNA hybrid ribonuclease activity;metal ion binding			Endonuclease;Hydrolase;Metal-binding;Nuclease
mgs1	Helicase	1	1	1	1	1	1	0	0	0	0	ATPase family associated with various cellular activities	3.6.1.15	GO:0006260;GO:0006281;GO:0006310	DNA replication;DNA repair;DNA recombination	GO:0016887;GO:0003677;GO:0009378;GO:0005524	ATP hydrolysis activity;DNA binding;four-way junction helicase activity;ATP binding			Hydrolase;ATP-binding;Helicase;Plasmid;Nucleotide-binding
secA	Helicase	1	1	1	1	1	1	0	0	0	0	Protein translocase subunit SecA	7.4.2.8	GO:0017038;GO:0065002;GO:0006605	protein import;intracellular protein transmembrane transport;protein targeting	GO:0008564;GO:0005524	protein-exporting ATPase activity;ATP binding	GO:0005886;GO:0005737	plasma membrane;cytoplasm	Translocase;Helicase;Nucleotide-binding;Hydrolase;Membrane;Cell membrane;Zinc;Cytoplasm;Coiled coil;ATP-binding;Protein transport;Transport;Translocation
mhp611	Helicase	1	1	0.977778	1	1	1	0	0	-0.0222222	0.0222222	ATP-binding protein	3.1.26.4			GO:0004386;GO:0004519;GO:0004523;GO:0005524	helicase activity;endonuclease activity;RNA-DNA hybrid ribonuclease activity;ATP binding			ATP-binding;Coiled coil;Endonuclease;Helicase;Hydrolase;Nuclease;Nucleotide-binding;Plasmid
MHR_0667	Helicase	1	1	1	1	1	1	0	0	0	0	DNA2-like helicase				GO:0004386	helicase activity			Coiled coil;Helicase
res	Helicase	0.875	0.642857	0.777778	1	0.684211	0.694444	0.305556	-0.0102339	0.0833333	-0.0935673	Helicase/UvrB N-terminal domain-containing protein				GO:0005524;GO:0016787;GO:0003677;GO:0004386	ATP binding;hydrolase activity;DNA binding;helicase activity			Coiled coil;Hydrolase;ATP-binding;Nucleotide-binding;Helicase
dnaC	Helicase	1	1	1	1	1	1	0	0	0	0	Replicative DNA helicase	3.6.4.12	GO:0006269	DNA replication, synthesis of RNA primer	GO:0005524;GO:0003678;GO:0016887;GO:0003677;GO:0016787	ATP binding;DNA helicase activity;ATP hydrolysis activity;DNA binding;hydrolase activity	GO:1990077	primosome complex	ATP-binding;Primosome;DNA replication;Hydrolase;DNA-binding;Nucleotide-binding;Helicase
ruvB	Helicase	1	1	0.977778	1	1	1	0	0	-0.0222222	0.0222222	Holliday junction branch migration complex subunit RuvB	3.6.4.12	GO:0006310;GO:0006281	DNA recombination;DNA repair	GO:0003677;GO:0016887;GO:0016787;GO:0009378;GO:0005524;GO:0000400	DNA binding;ATP hydrolysis activity;hydrolase activity;four-way junction helicase activity;ATP binding;four-way junction DNA binding	GO:0005737;GO:0048476	cytoplasm;Holliday junction resolvase complex	ATP-binding;Cytoplasm;DNA damage;Hydrolase;DNA-binding;Nucleotide-binding;DNA repair;Helicase;DNA recombination
pcrA	Helicase	1	1	1	1	1	1	0	0	0	0	DNA 3'-5' helicase	5.6.2.4			GO:0003678;GO:0005524;GO:0016787;GO:0016887;GO:0003677	DNA helicase activity;ATP binding;hydrolase activity;ATP hydrolysis activity;DNA binding			ATP-binding;DNA-binding;Hydrolase;Helicase;Nucleotide-binding
ruvA	Helicase	1	1	1	1	1	1	0	0	0	0	Holliday junction branch migration complex subunit RuvA	3.6.4.12	GO:0006310;GO:0006281	DNA recombination;DNA repair	GO:0009378;GO:0005524;GO:0000400;GO:0003678	four-way junction helicase activity;ATP binding;four-way junction DNA binding;DNA helicase activity	GO:0005737;GO:0009379;GO:0048476	cytoplasm;Holliday junction helicase complex;Holliday junction resolvase complex	DNA recombination;Nucleotide-binding;Helicase;DNA repair;DNA damage;Cytoplasm;DNA-binding;Hydrolase;ATP-binding
MOS_370	Helicase	0.375	0.214286	0.222222	0.1	0.368421	0.25	-0.15	0.118421	-0.0277778	0.146199	Putative helicase				GO:0004386	helicase activity			ATP-binding;Helicase;Hydrolase;Nucleotide-binding
recD2_5	Helicase	0	0.0357143	0.0444444	0	0	0.0277778	-0.0277778	-0.0277778	0.0166667	-0.0444444	ATP-dependent RecD-like DNA helicase	3.6.4.12			GO:0004386	helicase activity			ATP-binding;Hydrolase;Helicase;Exonuclease;Nucleotide-binding
unknown267	Helicase	0	0.0357143	0.133333	0	0	0.0277778	-0.0277778	-0.0277778	0.105556	-0.133333	Helicase				GO:0004386	helicase activity			ATP-binding;Helicase;Hydrolase;Nucleotide-binding
CRL67_09060	Helicase	0	0	0.0888889	0	0	0	0	0	0.0888889	-0.0888889	Helicase				GO:0004386	helicase activity			Nucleotide-binding;Helicase;ATP-binding;Hydrolase
res__2	Helicase	0	0.0357143	0.0222222	0	0	0.0277778	-0.0277778	-0.0277778	-0.00555556	-0.0222222	Type III restriction enzyme, res subunit	2.1.1.72	GO:0032259	methylation	GO:0009007;GO:0005524;GO:0004386;GO:0008168;GO:0016787;GO:0004519;GO:0003677	site-specific DNA-methyltransferase (adenine-specific) activity;ATP binding;helicase activity;methyltransferase activity;hydrolase activity;endonuclease activity;DNA binding	GO:0016020	membrane	Nucleotide-binding;Nuclease;Transmembrane;Helicase;Methyltransferase;Endonuclease;ATP-binding;Transmembrane helix;Hydrolase;Membrane
mhp639	Immune modulation	1	1	1	1	1	1	0	0	0	0	Immunoglobulin-blocking virulence protein						GO:0016020	membrane	Coiled coil;Transmembrane;Transmembrane helix
napA	Immune modulation	1	1	1	1	1	1	0	0	0	0	Neutrophil activating factor				GO:0008199	ferric iron binding
vlpA	Lipoprotein	1	0.214286	0.266667	1	0.473684	0.388889	0.611111	0.0847953	-0.122222	0.207018	87-kDa surface lipoprotein						GO:0005886	plasma membrane	Lipoprotein;Palmitate;Repeat;Signal
vlpA__2	Lipoprotein	0.875	0.357143	0.511111	1	0.368421	0.472222	0.527778	-0.103801	0.0388889	-0.14269	Variant surface antigen B						GO:0005886	plasma membrane	Cell membrane;Lipoprotein;Palmitate;Repeat;Signal
MHR_0298	Lipoprotein	1	1	1	1	1	1	0	0	0	0	DUF31 domain-containing protein								Coiled coil;Lipoprotein;Signal
MHR_0299	Lipoprotein	1	1	1	1	1	1	0	0	0	0	Putative lipoprotein								Lipoprotein;Signal
oppA	Lipoprotein	1	1	1	1	1	1	0	0	0	0	Solute-binding protein family 5 domain-containing protein						GO:0016020	membrane	Lipoprotein;Signal
lgt	Lipoprotein	1	1	1	1	1	1	0	0	0	0	Phosphatidylglycerol--prolipoprotein diacylglyceryl transferase	2.4.99.-;2.5.1.145	GO:0042158	lipoprotein biosynthetic process	GO:0008961	phosphatidylglycerol-prolipoprotein diacylglyceryl transferase activity	GO:0005886	plasma membrane	Lipoprotein;Transmembrane;Glycosyltransferase;Transferase;Cell membrane;Membrane;Transmembrane helix	Protein modification
MHR_0487	Lipoprotein	1	1	1	1	1	1	0	0	0	0	ABC transporter xylose-binding lipoprotein								Lipoprotein;Signal
MHR_0493	Lipoprotein	1	1	1	1	1	1	0	0	0	0	Lipoprotein								Signal
MHR_0538	Lipoprotein	0.375	0.321429	0.155556	0.1	0.368421	0.333333	-0.233333	0.0350877	-0.177778	0.212865	LppA family lipoprotein								Coiled coil;Signal
MOS_630	Lipoprotein	1	0.964286	0.955556	1	0.947368	0.972222	0.0277778	-0.0248538	-0.0166667	-0.00818713	Lipoprotein								Coiled coil
p37	Lipoprotein	1	1	1	1	1	1	0	0	0	0	High affinity transport system protein		GO:0001932;GO:0030334	regulation of protein phosphorylation;regulation of cell migration			GO:0030430	host cell cytoplasm	Lipoprotein;Palmitate;Signal;Transport
mhp364	Lipoprotein	1	1	1	1	1	1	0	0	0	0	p60-like lipoprotein								Lipoprotein;Signal
MHR_0639	Lipoprotein	1	1	1	1	1	1	0	0	0	0	Peptide ABC transporter substrate-binding protein								Lipoprotein;Signal
lppD-2	Lipoprotein	1	1	1	1	1	1	0	0	0	0	LppD family lipoprotein								Coiled coil;Lipoprotein;Signal
MOS_782	Lipoprotein	1	1	1	1	1	1	0	0	0	0	Lipoprotein								Coiled coil;Signal
mhp466	Lipoprotein	1	1	1	1	1	1	0	0	0	0	Lipoprotein								Signal;Coiled coil;Lipoprotein
MOS_031	Lipoprotein	1	1	0.955556	1	0.947368	1	0	-0.0526316	-0.0444444	-0.00818713	Lipoprotein, putative								Signal;Lipoprotein;Coiled coil
lpp	Lipoprotein	1	1	1	1	1	1	0	0	0	0	DUF31 domain-containing protein						GO:0005886	plasma membrane	Coiled coil;Lipoprotein;Palmitate;Plasmid;Signal
ushA	Lipoprotein	1	1	1	1	1	1	0	0	0	0	5'-nucleotidase	3.1.3.5	GO:0009166	nucleotide catabolic process	GO:0000166;GO:0008252;GO:0016791;GO:0046872;GO:0106411	nucleotide binding;nucleotidase activity;phosphatase activity;metal ion binding;XMP 5'-nucleosidase activity	GO:0110165	cellular anatomical entity	Coiled coil;Hydrolase;Lipoprotein;Nucleotide-binding;Signal
MHR_0059	Lipoprotein	1	1	1	1	1	1	0	0	0	0	Lipoprotein								Repeat;Signal
MHR_0061	Lipoprotein	1	0.964286	0.977778	1	1	0.972222	0.0277778	0.0277778	0.00555556	0.0222222	HYPOTHETICAL Uncharacterized lipoprotein MG260								Lipoprotein;Signal
MOS_070	Lipoprotein	1	1	1	1	1	1	0	0	0	0	Lipoprotein								Lipoprotein
mhp379	Lipoprotein	1	1	1	1	1	1	0	0	0	0	Putative lipoprotein						GO:0016020	membrane	Lipoprotein;Signal
tmpC	Lipoprotein	1	0.892857	0.866667	1	0.947368	0.916667	0.0833333	0.0307018	-0.05	0.0807018	ABC transporter xylose-binding lipoprotein						GO:0005886	plasma membrane	Lipoprotein;Signal
lspA	Lipoprotein	1	1	1	0.9	1	1	-0.1	0	0	0	Signal peptidase II	3.4.23.36	GO:0006508	proteolysis	GO:0004190	aspartic-type endopeptidase activity	GO:0005886	plasma membrane	Lipoprotein;Cell membrane;Aspartyl protease;Transmembrane helix;Hydrolase;Membrane;Transmembrane;Protease
MHR_0138	Lipoprotein	1	0.892857	0.888889	1	0.947368	0.916667	0.0833333	0.0307018	-0.0277778	0.0584795	Putative lipoprotein						GO:0016020	membrane	Lipoprotein
MYF_01625	Lipoprotein	1	0.964286	0.955556	1	0.947368	0.972222	0.0277778	-0.0248538	-0.0166667	-0.00818713	Lipoprotein						GO:0016020	membrane	Transmembrane;Membrane;Transmembrane helix
MYF_01620	Lipoprotein	1	0.928571	0.933333	1	0.947368	0.944444	0.0555556	0.00292398	-0.0111111	0.0140351	Transmembrane protein						GO:0016020	membrane	Lipoprotein;Transmembrane helix;Membrane;Transmembrane
p46	Lipoprotein	0.875	1	0.977778	0.9	1	0.972222	-0.0722222	0.0277778	0.00555556	0.0222222	46 kDa surface antigen						GO:0005886	plasma membrane	Cell membrane;Palmitate;Lipoprotein;Signal
MOS_200	Lipoprotein	0.875	0.464286	0.466667	0.8	0.526316	0.555556	0.244444	-0.0292398	-0.0888889	0.0596491	Lipoprotein								Coiled coil;Signal
MHR_0198	Lipoprotein	1	0.964286	1	0.7	0.947368	0.972222	-0.272222	-0.0248538	0.0277778	-0.0526316	Lipoprotein								Lipoprotein;Signal
mnuA	Lipoprotein	1	0.964286	1	1	1	0.972222	0.0277778	0.0277778	0.0277778	0	Membrane nuclease, lipoprotein				GO:0004519;GO:0004527	endonuclease activity;exonuclease activity			Signal;Nuclease;Exonuclease;Lipoprotein;Endonuclease
MOS_251	Lipoprotein	1	1	1	1	1	1	0	0	0	0	Lipoprotein-associated type-17 domain-containing protein								Signal
MHR_0227	Lipoprotein	1	1	1	1	1	1	0	0	0	0	Lipoprotein								Signal
glpD	Lipoprotein	1	0.964286	1	1	1	0.972222	0.0277778	0.0277778	0.0277778	0	Glycerol-3-phosphate dehydrogenase, putative	1.4.99.5;1.1.5.3;1.1.3.15;1.1.3.21;1.1.99.5	GO:0019563	glycerol catabolic process	GO:0050622;GO:0003973;GO:0052591;GO:0004369;GO:0016491	glycine dehydrogenase (cyanide-forming) activity;(S)-2-hydroxy-acid oxidase activity;sn-glycerol-3-phosphate;glycerol-3-phosphate oxidase activity;oxidoreductase activity			Virulence;Glycerol metabolism;Oxidoreductase;Palmitate;Lipoprotein	Polyol metabolism
MHR_0277	Lipoprotein	1	1	1	1	1	1	0	0	0	0	Lipoprotein								Coiled coil;Lipoprotein;Signal
lpp__2	Lipoprotein	0	0.107143	0.0222222	0.2	0.0526316	0.0833333	0.116667	-0.0307018	-0.0611111	0.0304094	DUF31 domain-containing protein								Coiled coil;Lipoprotein;Signal
MHR_0136	Lipoprotein	0.875	0.928571	0.8	1	0.894737	0.916667	0.0833333	-0.0219298	-0.116667	0.0947368	Lipoprotein						GO:0016020	membrane	Membrane;Transmembrane;Transmembrane helix
MOS_610	Lipoprotein	0.625	0.678571	0.844444	0.9	0.631579	0.666667	0.233333	-0.0350877	0.177778	-0.212865	Lipoprotein								Signal;Coiled coil
mnuA__2	Lipoprotein	1	1	0.977778	1	1	1	0	0	-0.0222222	0.0222222	Membrane nuclease, lipoprotein				GO:0004519;GO:0004527	endonuclease activity;exonuclease activity			Endonuclease;Exonuclease;Lipoprotein;Nuclease;Signal
MHR_0677	Lipoprotein	1	1	1	1	1	1	0	0	0	0	Lipoprotein								Lipoprotein;Signal
MHR_0022	Lipoprotein	1	1	1	1	1	1	0	0	0	0	Lipoprotein								Lipoprotein;Signal
MHR_0027	Lipoprotein	1	0.964286	0.977778	1	1	0.972222	0.0277778	0.0277778	0.00555556	0.0222222	Putative lipoprotein								Lipoprotein;Signal
MHR_0487__2	Lipoprotein	0	0	0	0.2	0	0	0.2	0	0	0	ABC transporter xylose-binding lipoprotein								Lipoprotein;Signal
MHR_0299__2	Lipoprotein	0	0	0	0.1	0	0	0.1	0	0	0	Putative lipoprotein								Lipoprotein;Signal
MHR_0639__2	Lipoprotein	0	0	0	0.1	0	0	0.1	0	0	0	Peptide ABC transporter substrate-binding protein								Lipoprotein;Signal
MHR_0551	Lipoprotein	0	0	0	0.1	0	0	0.1	0	0	0	Lipoprotein								Coiled coil
MHR_0214	Lipoprotein	1	0.964286	1	1	1	0.972222	0.0277778	0.0277778	0.0277778	0	Lipoprotein						GO:0016020	membrane	Transmembrane;Membrane;Transmembrane helix
unknown247	Lipoprotein	0.875	0.607143	0.644444	0.8	0.736842	0.666667	0.133333	0.0701754	-0.0222222	0.0923977	Lipoprotein								Signal
mnuA__3	Lipoprotein	0	0.178571	0.0222222	0	0.105263	0.138889	-0.138889	-0.0336257	-0.116667	0.0830409	Membrane nuclease, lipoprotein				GO:0004519;GO:0004527	endonuclease activity;exonuclease activity			Endonuclease;Exonuclease;Lipoprotein;Nuclease;Signal
xylF	Lipoprotein	0	0.107143	0.155556	0.1	0.0526316	0.0833333	0.0166667	-0.0307018	0.0722222	-0.102924	ABC transporter xylose-binding lipoprotein						GO:0005886	plasma membrane	Signal;Lipoprotein
nifU	Metal binding	1	1	1	1	1	1	0	0	0	0	Aminotransferase protein U-like protein		GO:0016226	iron-sulfur cluster assembly	GO:0008483;GO:0051536;GO:0005506	transaminase activity;iron-sulfur cluster binding;iron ion binding			Aminotransferase;Transferase
tsaD	Metal binding	1	1	1	1	1	1	0	0	0	0	tRNA N6-adenosine threonylcarbamoyltransferase	2.3.1.234	GO:0002949;GO:0006508	tRNA threonylcarbamoyladenosine modification;proteolysis	GO:0005506;GO:0008233;GO:0004519;GO:0016747;GO:0061711	iron ion binding;peptidase activity;endonuclease activity;acyltransferase activity, transferring groups other than amino-acyl groups;N(6)-L-threonylcarbamoyladenine synthase activity	GO:0005737	cytoplasm	Hydrolase;Transferase;Cytoplasm;Iron;tRNA processing;Protease;Acyltransferase;Nuclease;Metal-binding;Endonuclease
napA	Metal binding	1	1	1	1	1	1	0	0	0	0	Neutrophil activating factor				GO:0008199	ferric iron binding
nrdF	Metal binding	1	1	1	1	1	1	0	0	0	0	ribonucleoside-diphosphate reductase	1.17.4.1	GO:0006260;GO:0009263	DNA replication;deoxyribonucleotide biosynthetic process	GO:0004748;GO:0046872;GO:0016491	ribonucleoside-diphosphate reductase activity, thioredoxin disulfide as acceptor;metal ion binding;oxidoreductase activity	GO:0005971;GO:0016020	ribonucleoside-diphosphate reductase complex;membrane	Transmembrane helix;Membrane;Oxidoreductase;Genetic information processing;Metal-binding;Deoxyribonucleotide synthesis;Iron;Transmembrane	Genetic information processing
cysA	Metal binding	1	1	1	1	1	1	0	0	0	0	Glycerol transporter subunit A	3.6.3.20;3.6.3.25	GO:0008643	carbohydrate transport	GO:0005524;GO:0015408;GO:0016887;GO:0052689;GO:0140359	ATP binding;ABC-type ferric iron transporter activity;ATP hydrolysis activity;carboxylic ester hydrolase activity;ABC-type transporter activity	GO:0043190;GO:0055052	ATP-binding cassette (ABC) transporter complex;ATP-binding cassette (ABC) transporter complex, substrate-binding subunit-containing	ATP-binding;Coiled coil;Nucleotide-binding;Serine esterase;Sugar transport;Transport
pepF	Metal binding	1	1	1	1	1	1	0	0	0	0	Oligoendopeptidase F	3.4.24.-	GO:0006508	proteolysis	GO:0004222;GO:0046872	metalloendopeptidase activity;metal ion binding	GO:0016020	membrane	Membrane;Hydrolase;Metalloprotease;Transmembrane helix;Zinc;Metal-binding;Protease;Transmembrane
tkt	Metal binding	1	1	1	1	1	1	0	0	0	0	transketolase	2.2.1.1	GO:0006310;GO:0006098;GO:0019253	DNA recombination;pentose-phosphate shunt;reductive pentose-phosphate cycle	GO:0046872;GO:0016740;GO:0004802;GO:0016744	metal ion binding;transferase activity;transketolase activity;transketolase or transaldolase activity			Thiamine pyrophosphate;Membrane;DNA recombination;Transferase;Coiled coil;Magnesium;Transmembrane;Metal-binding;Calcium	Carbohydrate biosynthesis
ftsH	Metal binding	1	1	1	1	1	1	0	0	0	0	ATP-dependent zinc metalloprotease FtsH	3.4.24.-	GO:0006353;GO:0006508;GO:0030163;GO:0051301	DNA-templated transcription termination;proteolysis;protein catabolic process;cell division	GO:0004176;GO:0004222;GO:0005524;GO:0008237;GO:0008270;GO:0016887	ATP-dependent peptidase activity;metalloendopeptidase activity;ATP binding;metallopeptidase activity;zinc ion binding;ATP hydrolysis activity	GO:0005886	plasma membrane	ATP-binding;Cell cycle;Cell division;Cell membrane;Hydrolase;Metal-binding;Metalloprotease;Nucleotide-binding;Protease;Zinc
ORF1	Mobile element	1	1	1	1	1	1	0	0	0	0	Mobile element protein		GO:0015074;GO:0006313	DNA integration;DNA transposition	GO:0043565;GO:0003676;GO:0004803	sequence-specific DNA binding;nucleic acid binding;transposase activity			Coiled coil
MOS_151	Mobile element	0	0	0	0.1	0	0	0.1	0	0	0	Mobile element protein						GO:0016020	membrane	Membrane;Transmembrane;Transmembrane helix
MOS_155	Mobile element	0.625	0.392857	0.2	0.1	0.421053	0.444444	-0.344444	-0.0233918	-0.244444	0.221053	Mobile element protein						GO:0016020	membrane	Membrane;Transmembrane;Transmembrane helix
MOS_217	Mobile element	0.5	0.107143	0.0888889	0	0.105263	0.194444	-0.194444	-0.0891813	-0.105556	0.0163743	Mobile element protein		GO:0015074	DNA integration	GO:0003676;GO:0043565	nucleic acid binding;sequence-specific DNA binding
MOS_217__2	Mobile element	0	0.0357143	0	0	0	0.0277778	-0.0277778	-0.0277778	-0.0277778	0	Mobile element protein		GO:0015074	DNA integration	GO:0003676;GO:0043565	nucleic acid binding;sequence-specific DNA binding
lplA	Molecule modification	1	1	1	1	1	1	0	0	0	0	lipoate--protein ligase	2.7.7.63;6.3.1.20	GO:0009249	protein lipoylation	GO:0005524;GO:0016979	ATP binding;lipoate-protein ligase activity			Ligase;Transferase;Nucleotidyltransferase;ATP-binding;Nucleotide-binding	Protein modification
hemK	Molecule modification	1	1	1	1	1	1	0	0	0	0	peptide chain release factor N(5)-glutamine methyltransferase	1.3.3.4;2.1.1.298;2.1.1.-;2.1.1.297	GO:0006479;GO:0043412;GO:0018364	protein methylation;macromolecule modification;peptidyl-glutamine methylation	GO:0003676;GO:0016491;GO:0008757;GO:0004729;GO:0036009;GO:0102559;GO:0008276	nucleic acid binding;oxidoreductase activity;S-adenosylmethionine-dependent methyltransferase activity;oxygen-dependent protoporphyrinogen oxidase activity;protein-glutamine N-methyltransferase activity;protein-(glutamine-N5) methyltransferase activity;protein methyltransferase activity			S-adenosyl-L-methionine;Methyltransferase;Plasmid;Transferase;Oxidoreductase
hsdR_3	Molecule modification	0.75	0.821429	0.644444	0.2	0.789474	0.805556	-0.605556	-0.0160819	-0.161111	0.145029	type I site-specific deoxyribonuclease	3.1.21.3	GO:0009307	DNA restriction-modification system	GO:0003677;GO:0005524;GO:0009035	DNA binding;ATP binding;type I site-specific deoxyribonuclease activity			Coiled coil;DNA-binding;Endonuclease;Hydrolase;Nuclease;Restriction system
hsdM	Molecule modification	0.75	0.821429	0.688889	0.2	0.789474	0.805556	-0.605556	-0.0160819	-0.116667	0.100585	site-specific DNA-methyltransferase (adenine-specific)	2.1.1.72	GO:0009307	DNA restriction-modification system	GO:0003677;GO:0009007;GO:0008170	DNA binding;site-specific DNA-methyltransferase (adenine-specific) activity;N-methyltransferase activity			Transferase;Coiled coil;S-adenosyl-L-methionine;Methyltransferase
yfiC	Molecule modification	1	1	1	1	1	1	0	0	0	0	DNA methylase	2.1.1.72;2.1.1.223	GO:0006807;GO:0043412;GO:0044238;GO:0032259	nitrogen compound metabolic process;macromolecule modification;primary metabolic process;methylation	GO:0003676;GO:0008168;GO:0008757	nucleic acid binding;methyltransferase activity;S-adenosylmethionine-dependent methyltransferase activity			Methyltransferase;Plasmid;Transferase;Coiled coil
dcm	Molecule modification	0.5	0.142857	0.177778	0.9	0.210526	0.222222	0.677778	-0.0116959	-0.0444444	0.0327485	Cytosine-specific methyltransferase	2.1.1.37	GO:0009307;GO:0032259	DNA restriction-modification system;methylation	GO:0008168;GO:0003886	methyltransferase activity;DNA (cytosine-5-)-methyltransferase activity			Transferase;Coiled coil;Restriction system;S-adenosyl-L-methionine;Methyltransferase
dcm__2	Molecule modification	0.5	0.142857	0.177778	0.9	0.210526	0.222222	0.677778	-0.0116959	-0.0444444	0.0327485	Cytosine-specific methyltransferase	2.1.1.37	GO:0009307;GO:0032259	DNA restriction-modification system;methylation	GO:0008168;GO:0003886	methyltransferase activity;DNA (cytosine-5-)-methyltransferase activity			Methyltransferase;S-adenosyl-L-methionine;Restriction system;Coiled coil;Transferase
hsdS1	Molecule modification	1	0.857143	0.822222	1	0.736842	0.888889	0.111111	-0.152047	-0.0666667	-0.0853801	Restriction endonuclease subunit S	2.1.1.72;3.1.21.-;3.1.21.3	GO:0006306;GO:0009307	DNA methylation;DNA restriction-modification system	GO:0003677;GO:0004519;GO:0008170;GO:0009007;GO:0009035	DNA binding;endonuclease activity;N-methyltransferase activity;site-specific DNA-methyltransferase (adenine-specific) activity;type I site-specific deoxyribonuclease activity			Coiled coil;DNA-binding;Endonuclease;Hydrolase;Nuclease;Restriction system
map	Molecule modification	1	1	1	1	1	1	0	0	0	0	Methionine aminopeptidase	3.4.11.18	GO:0006508;GO:0036211	proteolysis;protein modification process	GO:0004239;GO:0046914;GO:0070006	initiator methionyl aminopeptidase activity;transition metal ion binding;metalloaminopeptidase activity			Aminopeptidase;Hydrolase;Metal-binding;Protease
tsaD	Molecule modification	1	1	1	1	1	1	0	0	0	0	tRNA N6-adenosine threonylcarbamoyltransferase	2.3.1.234	GO:0002949;GO:0006508	tRNA threonylcarbamoyladenosine modification;proteolysis	GO:0005506;GO:0008233;GO:0004519;GO:0016747;GO:0061711	iron ion binding;peptidase activity;endonuclease activity;acyltransferase activity, transferring groups other than amino-acyl groups;N(6)-L-threonylcarbamoyladenine synthase activity	GO:0005737	cytoplasm	Hydrolase;Transferase;Cytoplasm;Iron;tRNA processing;Protease;Acyltransferase;Nuclease;Metal-binding;Endonuclease
lgt	Molecule modification	1	1	1	1	1	1	0	0	0	0	Phosphatidylglycerol--prolipoprotein diacylglyceryl transferase	2.4.99.-;2.5.1.145	GO:0042158	lipoprotein biosynthetic process	GO:0008961	phosphatidylglycerol-prolipoprotein diacylglyceryl transferase activity	GO:0005886	plasma membrane	Lipoprotein;Transmembrane;Glycosyltransferase;Transferase;Cell membrane;Membrane;Transmembrane helix	Protein modification
trmA	Molecule modification	1	1	1	1	1	1	0	0	0	0	Putative RNA methyltransferase	2.1.1.190;2.1.1.-;2.1.1.189	GO:0006396;GO:0034470;GO:0006400	RNA processing;ncRNA processing;tRNA modification	GO:0008173	RNA methyltransferase activity			Methyltransferase;S-adenosyl-L-methionine;Transferase
tilS	Molecule modification	1	0.75	0.822222	1	0.789474	0.805556	0.194444	-0.0160819	0.0166667	-0.0327485	tRNA(Ile)-lysidine synthase	6.3.4.19	GO:0006400	tRNA modification	GO:0005524;GO:0016879	ATP binding;ligase activity, forming carbon-nitrogen bonds	GO:0005737	cytoplasm	Nucleotide-binding;tRNA processing;ATP-binding;Ligase;Cytoplasm
mnmE	Molecule modification	1	1	1	1	1	1	0	0	0	0	tRNA modification GTPase MnmE	3.6.-.-	GO:0006400	tRNA modification	GO:0003924;GO:0005525;GO:0046872	GTPase activity;GTP binding;metal ion binding	GO:0005737	cytoplasm	Nucleotide-binding;tRNA processing;Magnesium;Metal-binding;GTP-binding;Hydrolase;Potassium;Cytoplasm
msrB	Molecule modification	1	1	1	1	0.894737	1	0	-0.105263	0	-0.105263	peptide-methionine (R)-S-oxide reductase	1.8.4.11;1.8.4.12	GO:0006979;GO:0030091;GO:0036211	response to oxidative stress;protein repair;protein modification process	GO:0033744;GO:0008113;GO:0033743	L-methionine;peptide-methionine (S)-S-oxide reductase activity;peptide-methionine (R)-S-oxide reductase activity			Oxidoreductase
nrdI	Molecule modification	1	1	1	1	1	1	0	0	0	0	Protein NrdI		GO:0009263;GO:0036211	deoxyribonucleotide biosynthetic process;protein modification process	GO:0010181;GO:0004748	FMN binding;ribonucleoside-diphosphate reductase activity, thioredoxin disulfide as acceptor			Deoxyribonucleotide synthesis;Oxidoreductase;Ribonucleoprotein	Genetic information processing
nrdE	Molecule modification	1	1	1	1	1	1	0	0	0	0	Ribonucleoside-diphosphate reductase	1.17.4.1	GO:0036211;GO:0009263;GO:0006260	protein modification process;deoxyribonucleotide biosynthetic process;DNA replication	GO:0004748;GO:0005524	ribonucleoside-diphosphate reductase activity, thioredoxin disulfide as acceptor;ATP binding	GO:0005971	ribonucleoside-diphosphate reductase complex	Oxidoreductase;Genetic information processing;Deoxyribonucleotide synthesis	Genetic information processing
gidA	Molecule modification	1	1	1	1	1	1	0	0	0	0	tRNA uridine 5-carboxymethylaminomethyl modification enzyme MnmG		GO:0002098;GO:0008033	tRNA wobble uridine modification;tRNA processing	GO:0050660	flavin adenine dinucleotide binding	GO:0005737	cytoplasm	Coiled coil;Cytoplasm;FAD;Flavoprotein;NAD;tRNA processing
trmB	Molecule modification	1	1	1	1	1	1	0	0	0	0	tRNA(m7G46)-methyltransferase	2.1.1.33			GO:0008176	tRNA (guanine-N7-)-methyltransferase activity			Methyltransferase;S-adenosyl-L-methionine;Transferase;tRNA processing	tRNA modification
mnmA	Molecule modification	1	1	1	1	1	1	0	0	0	0	tRNA-specific 2-thiouridylase MnmA	2.8.1.13	GO:0032259;GO:0006400	methylation;tRNA modification	GO:0000049;GO:0016783;GO:0004808;GO:0005524;GO:0008168	tRNA binding;sulfurtransferase activity;tRNA (5-methylaminomethyl-2-thiouridylate)-methyltransferase activity;ATP binding;methyltransferase activity	GO:0005737	cytoplasm	Transferase;tRNA processing;RNA-binding;Nucleotide-binding;Cytoplasm;ATP-binding;tRNA-binding;Methyltransferase;Disulfide bond
hhaIM	Molecule modification	1	1	1	1	1	1	0	0	0	0	DNA (cytosine-5-)-methyltransferase	2.1.1.73;2.1.1.37	GO:0032259;GO:0009307	methylation;DNA restriction-modification system	GO:0003886;GO:0008168	DNA (cytosine-5-)-methyltransferase activity;methyltransferase activity			S-adenosyl-L-methionine;Transferase;Methyltransferase;Restriction system
tsaE	Molecule modification	1	1	1	1	1	1	0	0	0	0	tRNA threonylcarbamoyladenosine biosynthesis protein TsaE		GO:0016310;GO:0002949	phosphorylation;tRNA threonylcarbamoyladenosine modification	GO:0005524;GO:0016740;GO:0016301	ATP binding;transferase activity;kinase activity	GO:0005737	cytoplasm	Transferase;Kinase
tsaB	Molecule modification	1	1	1	1	1	1	0	0	0	0	tRNA (Adenosine(37)-N6)-threonylcarbamoyltransferase complex dimerization subunit type 1 TsaB		GO:0002949;GO:0006508	tRNA threonylcarbamoyladenosine modification;proteolysis	GO:0008233;GO:0016740	peptidase activity;transferase activity			Transferase;Protease;Hydrolase
tmcAL	Molecule modification	1	1	1	1	1	1	0	0	0	0	tRNA(Met) cytidine acetate ligase	6.3.4.-	GO:0006400;GO:0009058	tRNA modification;biosynthetic process	GO:0016879;GO:0003824;GO:0016740;GO:0005524;GO:0000049	ligase activity, forming carbon-nitrogen bonds;catalytic activity;transferase activity;ATP binding;tRNA binding	GO:0005737	cytoplasm	Nucleotide-binding;Plasmid;RNA-binding;tRNA processing;Transferase;tRNA-binding;ATP-binding;Cytoplasm;Ligase
lplA__2	Molecule modification	1	1	1	1	1	1	0	0	0	0	lipoate--protein ligase	2.7.7.63;6.3.1.20	GO:0009249	protein lipoylation	GO:0016779;GO:0005524;GO:0016979	nucleotidyltransferase activity;ATP binding;lipoate-protein ligase activity			ATP-binding;Ligase;Nucleotidyltransferase;Nucleotide-binding;Transferase	Protein modification
MOS_125	Molecule modification	1	1	1	1	1	1	0	0	0	0	Phage protein		GO:0043412;GO:0044238;GO:0006807;GO:0032259	macromolecule modification;primary metabolic process;nitrogen compound metabolic process;methylation	GO:0003676;GO:0008168	nucleic acid binding;methyltransferase activity			Plasmid;Transferase
msrA	Molecule modification	1	1	1	1	1	1	0	0	0	0	Peptide methionine sulfoxide reductase MsrA	1.8.4.12;1.8.4.11	GO:0006979;GO:0030091;GO:0036211	response to oxidative stress;protein repair;protein modification process	GO:0033744;GO:0008113;GO:0033743;GO:0004792	L-methionine;peptide-methionine (S)-S-oxide reductase activity;peptide-methionine (R)-S-oxide reductase activity;thiosulfate sulfurtransferase activity			Oxidoreductase;Signal
dcm__3	Molecule modification	1	1	1	1	1	1	0	0	0	0	Cytosine-specific methyltransferase	2.1.1.37	GO:0009307	DNA restriction-modification system	GO:0003886	DNA (cytosine-5-)-methyltransferase activity			Methyltransferase;Restriction system;S-adenosyl-L-methionine;Transferase
MOS_368	Molecule modification	0.125	0	0	0.1	0	0.0277778	0.0722222	-0.0277778	-0.0277778	0	type I site-specific deoxyribonuclease	3.1.21.3	GO:0009307	DNA restriction-modification system	GO:0003677;GO:0005524;GO:0009035	DNA binding;ATP binding;type I site-specific deoxyribonuclease activity			ATP-binding;Coiled coil;DNA-binding;Endonuclease;Nuclease;Restriction system
dcm__4	Molecule modification	0.25	0.107143	0.177778	0.7	0.105263	0.138889	0.561111	-0.0336257	0.0388889	-0.0725146	Cytosine-specific methyltransferase	2.1.1.37	GO:0009307;GO:0032259	DNA restriction-modification system;methylation	GO:0008168;GO:0003886	methyltransferase activity;DNA (cytosine-5-)-methyltransferase activity			S-adenosyl-L-methionine;Transferase;Methyltransferase;Restriction system;Coiled coil
dcm__5	Molecule modification	0.25	0.107143	0.177778	0.7	0.105263	0.138889	0.561111	-0.0336257	0.0388889	-0.0725146	Cytosine-specific methyltransferase	2.1.1.37	GO:0009307;GO:0032259	DNA restriction-modification system;methylation	GO:0008168;GO:0003886	methyltransferase activity;DNA (cytosine-5-)-methyltransferase activity			Restriction system;Methyltransferase;Transferase;S-adenosyl-L-methionine
mhp633	Molecule modification	1	1	1	1	1	1	0	0	0	0	Cytosine-specific methyltransferase	2.1.1.37	GO:0009307	DNA restriction-modification system	GO:0003886	DNA (cytosine-5-)-methyltransferase activity			Methyltransferase;Restriction system;S-adenosyl-L-methionine;Transferase
hsdS	Molecule modification	0.125	0	0	0	0	0.0277778	-0.0277778	-0.0277778	-0.0277778	0	Restriction endonuclease subunit S	3.1.21.3	GO:0009307	DNA restriction-modification system	GO:0009035;GO:0003677;GO:0004519	type I site-specific deoxyribonuclease activity;DNA binding;endonuclease activity			Endonuclease;Hydrolase;DNA-binding;Coiled coil;Restriction system;Nuclease
hsdS1__2	Molecule modification	0	0	0	0.1	0	0	0.1	0	0	0	Restriction endonuclease subunit S	2.1.1.72;3.1.21.-;3.1.21.3	GO:0009307	DNA restriction-modification system	GO:0003677;GO:0004519;GO:0008170;GO:0009007;GO:0009035	DNA binding;endonuclease activity;N-methyltransferase activity;site-specific DNA-methyltransferase (adenine-specific) activity;type I site-specific deoxyribonuclease activity			Coiled coil;DNA-binding;Endonuclease;Hydrolase;Nuclease;Restriction system
hsdR	Molecule modification	0.125	0.0357143	0.0444444	0	0	0.0555556	-0.0555556	-0.0555556	-0.0111111	-0.0444444	type I site-specific deoxyribonuclease	3.1.21.3	GO:0009307	DNA restriction-modification system	GO:0005524;GO:0003677;GO:0009035	ATP binding;DNA binding;type I site-specific deoxyribonuclease activity			ATP-binding;DNA-binding;Endonuclease;Hydrolase;Nuclease;Nucleotide-binding;Restriction system
hsdM__2	Molecule modification	0.125	0.0357143	0.0444444	0	0	0.0555556	-0.0555556	-0.0555556	-0.0111111	-0.0444444	site-specific DNA-methyltransferase (adenine-specific)	2.1.1.72	GO:0009307	DNA restriction-modification system	GO:0009007;GO:0008170;GO:0003677	site-specific DNA-methyltransferase (adenine-specific) activity;N-methyltransferase activity;DNA binding			Methyltransferase;Coiled coil;S-adenosyl-L-methionine;Transferase
hsdM__3	Molecule modification	0	0	0.0888889	0	0	0	0	0	0.0888889	-0.0888889	site-specific DNA-methyltransferase (adenine-specific)	2.1.1.72	GO:0009307	DNA restriction-modification system	GO:0008170;GO:0003677;GO:0009007	N-methyltransferase activity;DNA binding;site-specific DNA-methyltransferase (adenine-specific) activity			Transferase;S-adenosyl-L-methionine;Coiled coil;Methyltransferase
yhdJ	Molecule modification	0	0.0357143	0.0222222	0	0	0.0277778	-0.0277778	-0.0277778	-0.00555556	-0.0222222	Putative type III restriction/modification system modification methylase	2.1.1.72;2.1.1.-	GO:0006306;GO:0009307;GO:0044238;GO:0043412	DNA methylation;DNA restriction-modification system;primary metabolic process;macromolecule modification	GO:0009007;GO:0003677;GO:0004519;GO:0008170	site-specific DNA-methyltransferase (adenine-specific) activity;DNA binding;endonuclease activity;N-methyltransferase activity			Methyltransferase;Endonuclease;Hydrolase;Restriction system;Nuclease;Transferase
MHR_0200	Molecule modification	0	0.0357143	0.0222222	0	0	0.0277778	-0.0277778	-0.0277778	-0.00555556	-0.0222222	Restriction endonuclease S subunits		GO:0009307	DNA restriction-modification system	GO:0003677;GO:0004519	DNA binding;endonuclease activity			DNA-binding;Endonuclease;Hydrolase;Nuclease;Restriction system
MHR_0374	Molecule modification	0	0.0357143	0	0	0.0526316	0.0277778	-0.0277778	0.0248538	-0.0277778	0.0526316	Restriction endonuclease S subunits		GO:0009307	DNA restriction-modification system	GO:0004519;GO:0003677	endonuclease activity;DNA binding			Hydrolase;DNA-binding;Restriction system;Endonuclease;Nuclease
hsdS__2	Molecule modification	0	0.0357143	0	0	0	0.0277778	-0.0277778	-0.0277778	-0.0277778	0	Type I site-specific DNA methyltransferase specificity subunit	3.1.21.-;3.1.21.3	GO:0009307;GO:0032259	DNA restriction-modification system;methylation	GO:0008168;GO:0004519;GO:0009035;GO:0003677	methyltransferase activity;endonuclease activity;type I site-specific deoxyribonuclease activity;DNA binding			Nuclease;Transferase;Methyltransferase;Endonuclease;DNA-binding;Hydrolase;Restriction system;Coiled coil
dcm__6	Molecule modification	0	0.107143	0	0	0.0526316	0.0833333	-0.0833333	-0.0307018	-0.0833333	0.0526316	Cytosine-specific methyltransferase	2.1.1.37	GO:0032259;GO:0009307	methylation;DNA restriction-modification system	GO:0003886;GO:0008168	DNA (cytosine-5-)-methyltransferase activity;methyltransferase activity			Restriction system;Methyltransferase;Transferase;S-adenosyl-L-methionine
hsdS__3	Molecule modification	0	0.0357143	0	0	0.0526316	0.0277778	-0.0277778	0.0248538	-0.0277778	0.0526316	Restriction endonuclease subunit S	3.1.21.-;3.1.21.3	GO:0032259;GO:0009307	methylation;DNA restriction-modification system	GO:0004519;GO:0003677;GO:0009035;GO:0008168	endonuclease activity;DNA binding;type I site-specific deoxyribonuclease activity;methyltransferase activity			Nuclease;Transferase;Methyltransferase;Endonuclease;Coiled coil;Restriction system;Hydrolase;DNA-binding
MHR_0200__2	Molecule modification	0	0	0	0	0.0526316	0	0	0.0526316	0	0.0526316	Restriction endonuclease S subunits		GO:0009307	DNA restriction-modification system	GO:0004519;GO:0003677	endonuclease activity;DNA binding			Nuclease;Hydrolase;DNA-binding;Restriction system;Endonuclease
phnB	Mycoplasma-associated	1	1	1	1	1	1	0	0	0	0	Putative ABC transport system permease protein p69-like protein		GO:0055085	transmembrane transport			GO:0005886	plasma membrane	Repeat;Transport;Transmembrane helix;Membrane;Cell membrane;Transmembrane
p46	Mycoplasma-associated	0.875	1	0.977778	0.9	1	0.972222	-0.0722222	0.0277778	0.00555556	0.0222222	46 kDa surface antigen						GO:0005886	plasma membrane	Cell membrane;Palmitate;Lipoprotein;Signal
mhp364	Mycoplasma-associated	1	1	1	1	1	1	0	0	0	0	p60-like lipoprotein								Lipoprotein;Signal
MHR_0628	Mycoplasma-associated	1	1	1	1	1	1	0	0	0	0	Membrane protein P80						GO:0016020	membrane	Membrane;Transmembrane;Transmembrane helix
p115	Mycoplasma-associated	1	1	1	1	1	1	0	0	0	0	Chromosome partition protein Smc		GO:0051491;GO:0007062;GO:0030261;GO:0008284;GO:0001934;GO:0051276;GO:0030335;GO:0006260;GO:1902745;GO:0007059;GO:0051497	positive regulation of filopodium assembly;sister chromatid cohesion;chromosome condensation;positive regulation of cell population proliferation;positive regulation of protein phosphorylation;chromosome organization;positive regulation of cell migration;DNA replication;positive regulation of lamellipodium organization;chromosome segregation;negative regulation of stress fiber assembly	GO:0005524;GO:0016887;GO:0003677	ATP binding;ATP hydrolysis activity;DNA binding	GO:0005694;GO:0005737	chromosome;cytoplasm	ATP-binding;DNA-binding;Coiled coil;Cytoplasm;Nucleotide-binding;Plasmid
napA	Mycoplasma-associated	1	1	1	1	1	1	0	0	0	0	Neutrophil activating factor				GO:0008199	ferric iron binding
nrdF	Mycoplasma-associated	1	1	1	1	1	1	0	0	0	0	ribonucleoside-diphosphate reductase	1.17.4.1	GO:0006260;GO:0009263	DNA replication;deoxyribonucleotide biosynthetic process	GO:0004748;GO:0046872;GO:0016491	ribonucleoside-diphosphate reductase activity, thioredoxin disulfide as acceptor;metal ion binding;oxidoreductase activity	GO:0005971;GO:0016020	ribonucleoside-diphosphate reductase complex;membrane	Transmembrane helix;Membrane;Oxidoreductase;Genetic information processing;Metal-binding;Deoxyribonucleotide synthesis;Iron;Transmembrane	Genetic information processing
eno	Mycoplasma-associated	1	1	1	1	1	1	0	0	0	0	Enolase	4.2.1.11	GO:0006096	glycolytic process	GO:0000287;GO:0004634	magnesium ion binding;phosphopyruvate hydratase activity	GO:0009986;GO:0000015;GO:0005576	cell surface;phosphopyruvate hydratase complex;extracellular region	Pyruvate;Cytoplasm;Magnesium;Lyase;Secreted;Metal-binding;Glycolysis	Carbohydrate degradation
mgpA	Mycoplasma-associated	1	1	1	1	1	1	0	0	0	0	Mgpa-like protein	3.1.3.7;3.1.-.-			GO:0003676;GO:0016787;GO:0008441	nucleic acid binding;hydrolase activity;3'(2'),5'-bisphosphate nucleotidase activity			Plasmid;Exonuclease;Hydrolase
mgpA__2	Mycoplasma-associated	1	1	1	1	1	1	0	0	0	0	Bifunctional oligoribonuclease/PAP phosphatase NrnA	3.1.-.-;3.1.3.7			GO:0003676;GO:0004527;GO:0008441;GO:0016787	nucleic acid binding;exonuclease activity;3'(2'),5'-bisphosphate nucleotidase activity;hydrolase activity			Exonuclease;Hydrolase;Nuclease;Plasmid
MHR_0538	Mycoplasma-associated	0.375	0.321429	0.155556	0.1	0.368421	0.333333	-0.233333	0.0350877	-0.177778	0.212865	LppA family lipoprotein								Coiled coil;Signal
lppD-2	Mycoplasma-associated	1	1	1	1	1	1	0	0	0	0	LppD family lipoprotein								Coiled coil;Lipoprotein;Signal
lpp	Mycoplasma-associated	1	1	1	1	1	1	0	0	0	0	DUF31 domain-containing protein						GO:0005886	plasma membrane	Coiled coil;Lipoprotein;Palmitate;Plasmid;Signal
lpp__2	Mycoplasma-associated	0	0.107143	0.0222222	0.2	0.0526316	0.0833333	0.116667	-0.0307018	-0.0611111	0.0304094	DUF31 domain-containing protein								Coiled coil;Lipoprotein;Signal
hlyC	Mycoplasma-associated	1	1	1	1	1	1	0	0	0	0	Hemolysin C						GO:0016020	membrane	Repeat;Transmembrane helix;CBS domain;Membrane;Transmembrane
hlyA	Mycoplasma-associated	1	1	1	0.9	1	1	-0.1	0	0	0	TlyA haemolysin	2.1.1.226;2.1.1.-;2.1.1.227	GO:0032259;GO:0006364	methylation;rRNA processing	GO:0008168;GO:0003723	methyltransferase activity;RNA binding			RNA-binding;Transferase;rRNA processing;Methyltransferase
tuf	Mycoplasma-associated	1	1	1	1	1	1	0	0	0	0	Elongation factor Tu				GO:0003924;GO:0005525;GO:0003746	GTPase activity;GTP binding;translation elongation factor activity	GO:0005737	cytoplasm	Cytoplasm;GTP-binding;Protein biosynthesis;Elongation factor;Nucleotide-binding
oppD	Mycoplasma-associated	1	1	1	1	1	1	0	0	0	0	Oligopeptide transport system permease protein	3.6.3.-	GO:0015833	peptide transport	GO:0022857;GO:0016887;GO:0005524;GO:0001968	transmembrane transporter activity;ATP hydrolysis activity;ATP binding;fibronectin binding			ATP-binding;Nucleotide-binding
oppC	Mycoplasma-associated	1	1	1	1	1	1	0	0	0	0	Oligopeptide transport system permease protein		GO:0055085	transmembrane transport			GO:0005886	plasma membrane	Membrane;Transmembrane helix;Transmembrane;Transport
oppC__2	Mycoplasma-associated	1	1	1	1	1	1	0	0	0	0	Oligopeptide transport system permease protein		GO:0055085	transmembrane transport			GO:0005886	plasma membrane	Membrane;Transmembrane helix;Transport;Transmembrane
trxB	Peroxidase	1	1	1	1	1	1	0	0	0	0	Thioredoxin reductase	1.8.1.9	GO:0019430	removal of superoxide radicals	GO:0004791;GO:0016491;GO:0016668	thioredoxin-disulfide reductase activity;oxidoreductase activity;oxidoreductase activity, acting on a sulfur group of donors, NAD(P) as acceptor	GO:0005737	cytoplasm	NADP;Oxidoreductase;FAD;Flavoprotein;Disulfide bond;Redox-active center
tpx	Peroxidase	1	1	1	1	1	1	0	0	0	0	Thiol peroxidase	1.11.1.-			GO:0004601;GO:0016209;GO:0008379	peroxidase activity;antioxidant activity;thioredoxin peroxidase activity			Oxidoreductase;Peroxidase
nox	Peroxidase	1	1	1	1	1	1	0	0	0	0	NADH oxidase	1.6.99.3;1.11.1.1;1.6.3.4;1.8.1.14			GO:0050451;GO:0004497;GO:0050660;GO:0016491	CoA-disulfide reductase activity;monooxygenase activity;flavin adenine dinucleotide binding;oxidoreductase activity			Peroxidase;Redox-active center;Monooxygenase;Oxidoreductase;Oxidation
nfo	Phage-related	1	1	1	1	1	1	0	0	0	0	Probable endonuclease 4	3.1.21.2	GO:0006281	DNA repair	GO:0003677;GO:0008270;GO:0008833	DNA binding;zinc ion binding;deoxyribonuclease IV (phage-T4-induced) activity			Hydrolase;Zinc;DNA damage;DNA repair;Metal-binding;Nuclease;Endonuclease
MOS_125	Phage-related	1	1	1	1	1	1	0	0	0	0	Phage protein		GO:0043412;GO:0044238;GO:0006807;GO:0032259	macromolecule modification;primary metabolic process;nitrogen compound metabolic process;methylation	GO:0003676;GO:0008168	nucleic acid binding;methyltransferase activity			Plasmid;Transferase
mraZ	Regulation	1	1	1	1	1	1	0	0	0	0	Transcriptional regulator MraZ		GO:0051301	cell division	GO:0003677;GO:0003700	DNA binding;DNA-binding transcription factor activity	GO:0009295;GO:0005737	nucleoid;cytoplasm	Repeat;Cell division;Transcription regulation;Transcription;Cell cycle;DNA-binding;Cytoplasm
nusB	Regulation	1	1	1	1	1	1	0	0	0	0	Transcription antitermination protein NusB		GO:0006355	regulation of DNA-templated transcription	GO:0003723	RNA binding			Plasmid;RNA-binding
rpoD	Regulation	1	1	1	1	1	1	0	0	0	0	RNA polymerase sigma factor	2.7.7.6	GO:0006352	DNA-templated transcription initiation	GO:0003677;GO:0016987	DNA binding;sigma factor activity	GO:0005737;GO:0000428	cytoplasm;DNA-directed RNA polymerase complex	Cytoplasm;Coiled coil;Sigma factor;DNA-binding;Transcription;DNA-directed RNA polymerase;Transcription regulation
MOS_473	Regulation	1	1	0.977778	1	1	1	0	0	-0.0222222	0.0222222	Protein serine/threonine phosphatase PrpC, regulation of stationary phase		GO:0006470	protein dephosphorylation	GO:0004722	protein serine/threonine phosphatase activity
nusA	Regulation	1	1	1	1	1	1	0	0	0	0	Transcription termination-antitermination factor nusA		GO:0006353;GO:0031564	DNA-templated transcription termination;transcription antitermination	GO:0003700;GO:0003723	DNA-binding transcription factor activity;RNA binding	GO:0005737	cytoplasm	Coiled coil;Cytoplasm;RNA-binding;Transcription;Transcription regulation;Transcription termination
p115	Regulation	1	1	1	1	1	1	0	0	0	0	Chromosome partition protein Smc		GO:0051491;GO:0007062;GO:0030261;GO:0008284;GO:0001934;GO:0051276;GO:0030335;GO:0006260;GO:1902745;GO:0007059;GO:0051497	positive regulation of filopodium assembly;sister chromatid cohesion;chromosome condensation;positive regulation of cell population proliferation;positive regulation of protein phosphorylation;chromosome organization;positive regulation of cell migration;DNA replication;positive regulation of lamellipodium organization;chromosome segregation;negative regulation of stress fiber assembly	GO:0005524;GO:0016887;GO:0003677	ATP binding;ATP hydrolysis activity;DNA binding	GO:0005694;GO:0005737	chromosome;cytoplasm	ATP-binding;DNA-binding;Coiled coil;Cytoplasm;Nucleotide-binding;Plasmid
yrbC	Regulation	1	1	1	1	1	1	0	0	0	0	YebC/PmpR family DNA-binding transcriptional regulator		GO:0006355	regulation of DNA-templated transcription	GO:0003677	DNA binding	GO:0005737	cytoplasm	Cytoplasm;DNA-binding;Transcription;Transcription regulation
MHR_0571	Regulation	0.125	0	0	0.4	0	0.0277778	0.372222	-0.0277778	-0.0277778	0	Asp-tRNAAsn/Glu-tRNAGln amidotransferase C subunit		GO:0006450	regulation of translational fidelity	GO:0016740	transferase activity			Transferase
MHR_0571__2	Regulation	1	1	1	1	1	1	0	0	0	0	Asp-tRNAAsn/Glu-tRNAGln amidotransferase C subunit		GO:0006450	regulation of translational fidelity	GO:0016740	transferase activity			Transferase
gpmI	Regulation	1	1	1	1	1	1	0	0	0	0	2,3-bisphosphoglycerate-independent phosphoglycerate mutase	5.4.2.12	GO:0006096;GO:0006007;GO:0051919;GO:0030435	glycolytic process;glucose catabolic process;positive regulation of fibrinolysis;sporulation resulting in formation of a cellular spore	GO:0004619;GO:0046537;GO:0030145	phosphoglycerate mutase activity;2,3-bisphosphoglycerate-independent phosphoglycerate mutase activity;manganese ion binding	GO:0005737	cytoplasm	Glycolysis;Metal-binding;Isomerase;Sporulation;Manganese	Carbohydrate degradation
MHR_0613	Regulation	1	1	1	1	0.947368	1	0	-0.0526316	0	-0.0526316	Transcriptional regulator		GO:1901135	carbohydrate derivative metabolic process	GO:0003700;GO:0003677;GO:0097367	DNA-binding transcription factor activity;DNA binding;carbohydrate derivative binding			Transcription regulation;Transcription;DNA-binding
p37	Regulation	1	1	1	1	1	1	0	0	0	0	High affinity transport system protein		GO:0001932;GO:0030334	regulation of protein phosphorylation;regulation of cell migration			GO:0030430	host cell cytoplasm	Lipoprotein;Palmitate;Signal;Transport
whiA	Regulation	1	1	1	1	1	1	0	0	0	0	DNA-binding protein WhiA		GO:0007049;GO:0043937;GO:0051301	cell cycle;regulation of sporulation;cell division	GO:0003677	DNA binding			Cell division;Cell cycle;DNA-binding
dnaA	Regulation	1	1	1	1	1	1	0	0	0	0	Chromosomal replication initiator protein DnaA		GO:0006270;GO:0006275	DNA replication initiation;regulation of DNA replication	GO:0003688;GO:0043565;GO:0005524	DNA replication origin binding;sequence-specific DNA binding;ATP binding	GO:0005737	cytoplasm	Nucleotide-binding;ATP-binding;Cytoplasm;DNA-binding;DNA replication
greA	Regulation	1	1	1	0.9	1	1	-0.1	0	0	0	Transcript cleavage factor GreA		GO:0032784	regulation of DNA-templated transcription elongation	GO:0003677;GO:0003746;GO:0070063	DNA binding;translation elongation factor activity;RNA polymerase binding			Coiled coil;DNA-binding;Elongation factor;Protein biosynthesis;Transcription;Transcription regulation
MHR_0044	Regulation	1	0.964286	1	1	1	0.972222	0.0277778	0.0277778	0.0277778	0	Transcriptional regulator				GO:0003677;GO:0003700	DNA binding;DNA-binding transcription factor activity			Transcription;Transcription regulation;DNA-binding
lepA	Regulation	1	1	1	1	1	1	0	0	0	0	Elongation factor 4	3.6.5.n1	GO:0045727	positive regulation of translation	GO:0003746;GO:0043022;GO:0003924;GO:0005525	translation elongation factor activity;ribosome binding;GTPase activity;GTP binding	GO:0005886	plasma membrane	Cell membrane;Hydrolase;Membrane;Protein biosynthesis;GTP-binding;Elongation factor;Nucleotide-binding
hrcA	Regulation	1	1	1	1	1	1	0	0	0	0	Heat-inducible transcription repressor HrcA		GO:0045892	negative regulation of DNA-templated transcription	GO:0003677	DNA binding			Transcription;Transcription regulation;Repressor;Stress response
MCYN0079	Regulation	1	0.964286	1	0.6	0.947368	0.972222	-0.372222	-0.0248538	0.0277778	-0.0526316	GntR family transcriptional regulator				GO:0003677;GO:0003700	DNA binding;DNA-binding transcription factor activity			Transcription regulation;Transcription;DNA-binding;Plasmid
nusG	Regulation	1	1	1	1	1	1	0	0	0	0	Transcription termination/antitermination protein NusG		GO:0006353;GO:0031564;GO:0032784;GO:0140673	DNA-templated transcription termination;transcription antitermination;regulation of DNA-templated transcription elongation;transcription elongation-coupled chromatin remodeling					Transcription;Transcription antitermination;Transcription regulation;Transcription termination
rplA	Regulation	1	1	1	1	1	1	0	0	0	0	Large ribosomal subunit protein uL1		GO:0006417;GO:0006412	regulation of translation;translation	GO:0000049;GO:0019843;GO:0003735	tRNA binding;rRNA binding;structural constituent of ribosome	GO:0015934	large ribosomal subunit	rRNA-binding;Translation regulation;RNA-binding;tRNA-binding;Ribonucleoprotein;Repressor;Ribosomal protein
lepA__2	Regulation	0	0	0	0.1	0	0	0.1	0	0	0	EF-4	3.6.5.n1;3.6.5.-	GO:0045727	positive regulation of translation	GO:0005525;GO:0003924;GO:0043022;GO:0097216;GO:0003746	GTP binding;GTPase activity;ribosome binding;guanosine tetraphosphate binding;translation elongation factor activity	GO:0005886	plasma membrane	Cell membrane;Membrane;Hydrolase;Protein biosynthesis;GTP-binding;Nucleotide-binding;Elongation factor
MHR_0508	Regulation	0	0	0	0.1	0	0	0.1	0	0	0	Probable transcriptional regulatory protein HF996_01145		GO:0006355	regulation of DNA-templated transcription	GO:0003677	DNA binding	GO:0005737	cytoplasm	Cytoplasm;DNA-binding;Transcription;Transcription regulation
secG	Secretion	1	1	1	1	1	1	0	0	0	0	Protein-export membrane protein SecG		GO:0009306	protein secretion	GO:0015450	protein-transporting ATPase activity	GO:0005886	plasma membrane	Transmembrane;Protein transport;Translocation;Transport;Transmembrane helix;Membrane;Cell membrane
eno	Secretion	1	1	1	1	1	1	0	0	0	0	Enolase	4.2.1.11	GO:0006096	glycolytic process	GO:0000287;GO:0004634	magnesium ion binding;phosphopyruvate hydratase activity	GO:0009986;GO:0000015;GO:0005576	cell surface;phosphopyruvate hydratase complex;extracellular region	Pyruvate;Cytoplasm;Magnesium;Lyase;Secreted;Metal-binding;Glycolysis	Carbohydrate degradation
unknown53	Secretion	0.375	0	0	0.5	0	0.0833333	0.416667	-0.0833333	-0.0833333	0	Secreted protein						GO:0016020	membrane	Membrane;Transmembrane;Transmembrane helix
secE	Secretion	1	1	1	0.7	1	1	-0.3	0	0	0	Protein translocase subunit SecE		GO:0043952;GO:0006605;GO:0065002;GO:0009306	protein transport by the Sec complex;protein targeting;intracellular protein transmembrane transport;protein secretion	GO:0008320	protein transmembrane transporter activity	GO:0005886	plasma membrane	Transmembrane;Transport;Translocation;Protein transport;Cell membrane;Membrane;Transmembrane helix
vlpA	Signal	1	0.214286	0.266667	1	0.473684	0.388889	0.611111	0.0847953	-0.122222	0.207018	87-kDa surface lipoprotein						GO:0005886	plasma membrane	Lipoprotein;Palmitate;Repeat;Signal
vlpA__2	Signal	0.875	0.357143	0.511111	1	0.368421	0.472222	0.527778	-0.103801	0.0388889	-0.14269	Variant surface antigen B						GO:0005886	plasma membrane	Cell membrane;Lipoprotein;Palmitate;Repeat;Signal
MHR_0285	Signal	1	1	1	1	1	1	0	0	0	0	DUF31 domain-containing protein				GO:0003723;GO:0003724;GO:0005524	RNA binding;RNA helicase activity;ATP binding	GO:0016020	membrane	Membrane;Signal;Transmembrane;Transmembrane helix
MHR_0298	Signal	1	1	1	1	1	1	0	0	0	0	DUF31 domain-containing protein								Coiled coil;Lipoprotein;Signal
MHR_0299	Signal	1	1	1	1	1	1	0	0	0	0	Putative lipoprotein								Lipoprotein;Signal
oppA	Signal	1	1	1	1	1	1	0	0	0	0	Solute-binding protein family 5 domain-containing protein						GO:0016020	membrane	Lipoprotein;Signal
MHR_0358	Signal	1	1	1	1	1	1	0	0	0	0	PDxFFG protein								Coiled coil;Signal
ffh	Signal	1	1	1	1	1	1	0	0	0	0	Signal recognition particle protein		GO:0006614;GO:0006612	SRP-dependent cotranslational protein targeting to membrane;protein targeting to membrane	GO:0003924;GO:0005525;GO:0008312	GTPase activity;GTP binding;7S RNA binding	GO:0048500	signal recognition particle	RNA-binding;Cytoplasm;Coiled coil;Signal recognition particle;Ribonucleoprotein;GTP-binding;Nucleotide-binding
dacA	Signal	1	1	1	1	1	1	0	0	0	0	DAC domain-containing protein	2.7.7.85	GO:0019932;GO:0006171	second-messenger-mediated signaling;cAMP biosynthetic process	GO:0016779;GO:0004016;GO:0005524;GO:0106408	nucleotidyltransferase activity;adenylate cyclase activity;ATP binding;diadenylate cyclase activity	GO:0016020	membrane	Nucleotide-binding;ATP-binding;Nucleotidyltransferase;Transmembrane;Membrane;Transmembrane helix;Transferase
polA	Signal	1	1	0.977778	1	1	1	0	0	-0.0222222	0.0222222	DNA polymerase I	3.1.11.-;2.7.7.7	GO:0033567	DNA replication, Okazaki fragment processing	GO:0017108;GO:0003887;GO:0004527;GO:0003677	5'-flap endonuclease activity;DNA-directed DNA polymerase activity;exonuclease activity;DNA binding			Hydrolase;Transferase;DNA-binding;DNA-directed DNA polymerase;Exonuclease;Nuclease;Signal;Nucleotidyltransferase
MHR_0487	Signal	1	1	1	1	1	1	0	0	0	0	ABC transporter xylose-binding lipoprotein								Lipoprotein;Signal
MHR_0493	Signal	1	1	1	1	1	1	0	0	0	0	Lipoprotein								Signal
MHR_0538	Signal	0.375	0.321429	0.155556	0.1	0.368421	0.333333	-0.233333	0.0350877	-0.177778	0.212865	LppA family lipoprotein								Coiled coil;Signal
amy	Signal	1	0.964286	1	1	1	0.972222	0.0277778	0.0277778	0.0277778	0	Alpha-amylase	2.4.1.25;3.2.1.1;3.2.1.10	GO:0005975	carbohydrate metabolic process	GO:0004574;GO:0004134;GO:0004556;GO:0043169;GO:0016829;GO:0102500	oligo-1,6-glucosidase activity;4-alpha-glucanotransferase activity;alpha-amylase activity;cation binding;lyase activity;beta-maltose 4-alpha-glucanotransferase activity			Signal;Lyase;Carbohydrate metabolism;Hydrolase;Glycosyltransferase;Glycosidase
MHR_0597	Signal	1	1	1	1	1	1	0	0	0	0							GO:0016020	membrane	Signal
p37	Signal	1	1	1	1	1	1	0	0	0	0	High affinity transport system protein		GO:0001932;GO:0030334	regulation of protein phosphorylation;regulation of cell migration			GO:0030430	host cell cytoplasm	Lipoprotein;Palmitate;Signal;Transport
mhp364	Signal	1	1	1	1	1	1	0	0	0	0	p60-like lipoprotein								Lipoprotein;Signal
MHR_0639	Signal	1	1	1	1	1	1	0	0	0	0	Peptide ABC transporter substrate-binding protein								Lipoprotein;Signal
MHR_0655	Signal	1	1	1	1	1	1	0	0	0	0	Conserved hypothetical transmembrane protein						GO:0016020	membrane	Membrane;Transmembrane helix;Transmembrane;Signal
lppD-2	Signal	1	1	1	1	1	1	0	0	0	0	LppD family lipoprotein								Coiled coil;Lipoprotein;Signal
MOS_782	Signal	1	1	1	1	1	1	0	0	0	0	Lipoprotein								Coiled coil;Signal
mhp466	Signal	1	1	1	1	1	1	0	0	0	0	Lipoprotein								Signal;Coiled coil;Lipoprotein
MOS_031	Signal	1	1	0.955556	1	0.947368	1	0	-0.0526316	-0.0444444	-0.00818713	Lipoprotein, putative								Signal;Lipoprotein;Coiled coil
lpp	Signal	1	1	1	1	1	1	0	0	0	0	DUF31 domain-containing protein						GO:0005886	plasma membrane	Coiled coil;Lipoprotein;Palmitate;Plasmid;Signal
ushA	Signal	1	1	1	1	1	1	0	0	0	0	5'-nucleotidase	3.1.3.5	GO:0009166	nucleotide catabolic process	GO:0000166;GO:0008252;GO:0016791;GO:0046872;GO:0106411	nucleotide binding;nucleotidase activity;phosphatase activity;metal ion binding;XMP 5'-nucleosidase activity	GO:0110165	cellular anatomical entity	Coiled coil;Hydrolase;Lipoprotein;Nucleotide-binding;Signal
MHR_0059	Signal	1	1	1	1	1	1	0	0	0	0	Lipoprotein								Repeat;Signal
MHR_0061	Signal	1	0.964286	0.977778	1	1	0.972222	0.0277778	0.0277778	0.00555556	0.0222222	HYPOTHETICAL Uncharacterized lipoprotein MG260								Lipoprotein;Signal
mhp379	Signal	1	1	1	1	1	1	0	0	0	0	Putative lipoprotein						GO:0016020	membrane	Lipoprotein;Signal
tmpC	Signal	1	0.892857	0.866667	1	0.947368	0.916667	0.0833333	0.0307018	-0.05	0.0807018	ABC transporter xylose-binding lipoprotein						GO:0005886	plasma membrane	Lipoprotein;Signal
ftsY	Signal	1	1	1	1	1	1	0	0	0	0	Signal recognition particle receptor FtsY	3.6.5.4	GO:0006612;GO:0051301;GO:0006614	protein targeting to membrane;cell division;SRP-dependent cotranslational protein targeting to membrane	GO:0005525;GO:0003924	GTP binding;GTPase activity	GO:0005886;GO:0005737	plasma membrane;cytoplasm	Nucleotide-binding;Receptor;Membrane;Cell cycle;Cell membrane;Cytoplasm;Coiled coil;Cell division;GTP-binding
ligA	Signal	1	1	1	1	1	1	0	0	0	0	DNA ligase	6.5.1.2	GO:0007165;GO:0006260;GO:0006281	signal transduction;DNA replication;DNA repair	GO:0046872;GO:0003677;GO:0003911	metal ion binding;DNA binding;DNA ligase (NAD+) activity			NAD;Metal-binding;Magnesium;Manganese;Coiled coil;DNA damage;Zinc;Ligase;DNA replication;DNA repair
msrA	Signal	1	1	1	1	1	1	0	0	0	0	Peptide methionine sulfoxide reductase MsrA	1.8.4.12;1.8.4.11	GO:0006979;GO:0030091;GO:0036211	response to oxidative stress;protein repair;protein modification process	GO:0033744;GO:0008113;GO:0033743;GO:0004792	L-methionine;peptide-methionine (S)-S-oxide reductase activity;peptide-methionine (R)-S-oxide reductase activity;thiosulfate sulfurtransferase activity			Oxidoreductase;Signal
lspA	Signal	1	1	1	0.9	1	1	-0.1	0	0	0	Signal peptidase II	3.4.23.36	GO:0006508	proteolysis	GO:0004190	aspartic-type endopeptidase activity	GO:0005886	plasma membrane	Lipoprotein;Cell membrane;Aspartyl protease;Transmembrane helix;Hydrolase;Membrane;Transmembrane;Protease
p46	Signal	0.875	1	0.977778	0.9	1	0.972222	-0.0722222	0.0277778	0.00555556	0.0222222	46 kDa surface antigen						GO:0005886	plasma membrane	Cell membrane;Palmitate;Lipoprotein;Signal
MOS_200	Signal	0.875	0.464286	0.466667	0.8	0.526316	0.555556	0.244444	-0.0292398	-0.0888889	0.0596491	Lipoprotein								Coiled coil;Signal
MHR_0198	Signal	1	0.964286	1	0.7	0.947368	0.972222	-0.272222	-0.0248538	0.0277778	-0.0526316	Lipoprotein								Lipoprotein;Signal
mnuA	Signal	1	0.964286	1	1	1	0.972222	0.0277778	0.0277778	0.0277778	0	Membrane nuclease, lipoprotein				GO:0004519;GO:0004527	endonuclease activity;exonuclease activity			Signal;Nuclease;Exonuclease;Lipoprotein;Endonuclease
MOS_251	Signal	1	1	1	1	1	1	0	0	0	0	Lipoprotein-associated type-17 domain-containing protein								Signal
MHR_0227	Signal	1	1	1	1	1	1	0	0	0	0	Lipoprotein								Signal
MHR_0277	Signal	1	1	1	1	1	1	0	0	0	0	Lipoprotein								Coiled coil;Lipoprotein;Signal
MOS_050	Signal	0	0.107143	0.0222222	0.2	0.0526316	0.0833333	0.116667	-0.0307018	-0.0611111	0.0304094	DUF31 domain-containing protein								Signal
lpp__2	Signal	0	0.107143	0.0222222	0.2	0.0526316	0.0833333	0.116667	-0.0307018	-0.0611111	0.0304094	DUF31 domain-containing protein								Coiled coil;Lipoprotein;Signal
MHR_0168	Signal	0.75	0.75	0.844444	1	0.842105	0.75	0.25	0.0921053	0.0944444	-0.00233918	Transmembrane protein						GO:0016020	membrane	Transmembrane helix;Membrane;Transmembrane;Signal
MOS_610	Signal	0.625	0.678571	0.844444	0.9	0.631579	0.666667	0.233333	-0.0350877	0.177778	-0.212865	Lipoprotein								Signal;Coiled coil
mnuA__2	Signal	1	1	0.977778	1	1	1	0	0	-0.0222222	0.0222222	Membrane nuclease, lipoprotein				GO:0004519;GO:0004527	endonuclease activity;exonuclease activity			Endonuclease;Exonuclease;Lipoprotein;Nuclease;Signal
MHR_0677	Signal	1	1	1	1	1	1	0	0	0	0	Lipoprotein								Lipoprotein;Signal
MHR_0293	Signal	1	1	1	1	1	1	0	0	0	0	SGNH hydrolase-type esterase domain-containing protein				GO:0016787	hydrolase activity			Hydrolase;Signal
MHR_0022	Signal	1	1	1	1	1	1	0	0	0	0	Lipoprotein								Lipoprotein;Signal
MHR_0027	Signal	1	0.964286	0.977778	1	1	0.972222	0.0277778	0.0277778	0.00555556	0.0222222	Putative lipoprotein								Lipoprotein;Signal
MHR_0487__2	Signal	0	0	0	0.2	0	0	0.2	0	0	0	ABC transporter xylose-binding lipoprotein								Lipoprotein;Signal
MHR_0299__2	Signal	0	0	0	0.1	0	0	0.1	0	0	0	Putative lipoprotein								Lipoprotein;Signal
MHR_0639__2	Signal	0	0	0	0.1	0	0	0.1	0	0	0	Peptide ABC transporter substrate-binding protein								Lipoprotein;Signal
MHR_0358__2	Signal	0	0	0	0.1	0	0	0.1	0	0	0	PDxFFG protein								Coiled coil;Signal
unknown247	Signal	0.875	0.607143	0.644444	0.8	0.736842	0.666667	0.133333	0.0701754	-0.0222222	0.0923977	Lipoprotein								Signal
mnuA__3	Signal	0	0.178571	0.0222222	0	0.105263	0.138889	-0.138889	-0.0336257	-0.116667	0.0830409	Membrane nuclease, lipoprotein				GO:0004519;GO:0004527	endonuclease activity;exonuclease activity			Endonuclease;Exonuclease;Lipoprotein;Nuclease;Signal
xylF	Signal	0	0.107143	0.155556	0.1	0.0526316	0.0833333	0.0166667	-0.0307018	0.0722222	-0.102924	ABC transporter xylose-binding lipoprotein						GO:0005886	plasma membrane	Signal;Lipoprotein
p115	Stress-response	1	1	1	1	1	1	0	0	0	0	Chromosome partition protein Smc		GO:0051491;GO:0007062;GO:0030261;GO:0008284;GO:0001934;GO:0051276;GO:0030335;GO:0006260;GO:1902745;GO:0007059;GO:0051497	positive regulation of filopodium assembly;sister chromatid cohesion;chromosome condensation;positive regulation of cell population proliferation;positive regulation of protein phosphorylation;chromosome organization;positive regulation of cell migration;DNA replication;positive regulation of lamellipodium organization;chromosome segregation;negative regulation of stress fiber assembly	GO:0005524;GO:0016887;GO:0003677	ATP binding;ATP hydrolysis activity;DNA binding	GO:0005694;GO:0005737	chromosome;cytoplasm	ATP-binding;DNA-binding;Coiled coil;Cytoplasm;Nucleotide-binding;Plasmid
lon	Stress-response	1	1	1	1	1	1	0	0	0	0	Lon protease	3.4.21.53	GO:0006508;GO:0006515;GO:0030163;GO:0034605	proteolysis;protein quality control for misfolded or incompletely synthesized proteins;protein catabolic process;cellular response to heat	GO:0005524;GO:0004252;GO:0043565;GO:0016887;GO:0004176	ATP binding;serine-type endopeptidase activity;sequence-specific DNA binding;ATP hydrolysis activity;ATP-dependent peptidase activity	GO:0005737	cytoplasm	Stress response;Protease;Serine protease;Nucleotide-binding;ATP-binding;Hydrolase;Coiled coil;Cytoplasm
msrB	Stress-response	1	1	1	1	0.894737	1	0	-0.105263	0	-0.105263	peptide-methionine (R)-S-oxide reductase	1.8.4.11;1.8.4.12	GO:0006979;GO:0030091;GO:0036211	response to oxidative stress;protein repair;protein modification process	GO:0033744;GO:0008113;GO:0033743	L-methionine;peptide-methionine (S)-S-oxide reductase activity;peptide-methionine (R)-S-oxide reductase activity			Oxidoreductase
dnaK	Stress-response	1	1	1	1	1	1	0	0	0	0	Molecular chaperone DnaK		GO:0051085	chaperone cofactor-dependent protein refolding	GO:0005524;GO:0031072;GO:0051082;GO:0140662	ATP binding;heat shock protein binding;unfolded protein binding;ATP-dependent protein folding chaperone			Stress response;Nucleotide-binding;Phosphoprotein;Chaperone;ATP-binding;Coiled coil
dnaJ	Stress-response	1	1	1	1	1	1	0	0	0	0	Chaperone protein DnaJ		GO:0009408;GO:0006260;GO:0006457	response to heat;DNA replication;protein folding	GO:0005524;GO:0008270;GO:0051082;GO:0031072	ATP binding;zinc ion binding;unfolded protein binding;heat shock protein binding	GO:0005737	cytoplasm	Stress response;Chaperone;Zinc-finger;Repeat;Metal-binding;Zinc;DNA replication;Cytoplasm
hrcA	Stress-response	1	1	1	1	1	1	0	0	0	0	Heat-inducible transcription repressor HrcA		GO:0045892	negative regulation of DNA-templated transcription	GO:0003677	DNA binding			Transcription;Transcription regulation;Repressor;Stress response
grpE	Stress-response	1	1	0.977778	1	1	1	0	0	-0.0222222	0.0222222	Protein GrpE		GO:0006457	protein folding	GO:0051087;GO:0000774;GO:0042803;GO:0003755	protein-folding chaperone binding;adenyl-nucleotide exchange factor activity;protein homodimerization activity;peptidyl-prolyl cis-trans isomerase activity	GO:0005737	cytoplasm	Stress response;Chaperone;Cytoplasm;Coiled coil
msrA	Stress-response	1	1	1	1	1	1	0	0	0	0	Peptide methionine sulfoxide reductase MsrA	1.8.4.12;1.8.4.11	GO:0006979;GO:0030091;GO:0036211	response to oxidative stress;protein repair;protein modification process	GO:0033744;GO:0008113;GO:0033743;GO:0004792	L-methionine;peptide-methionine (S)-S-oxide reductase activity;peptide-methionine (R)-S-oxide reductase activity;thiosulfate sulfurtransferase activity			Oxidoreductase;Signal
ganQ	Stress-response	1	0.964286	1	0.7	0.947368	0.972222	-0.272222	-0.0248538	0.0277778	-0.0526316	Sugar ABC transporter permease		GO:0015675;GO:0055085;GO:0042956;GO:0015768;GO:0008643	nickel cation transport;transmembrane transport;maltodextrin transmembrane transport;maltose transport;carbohydrate transport	GO:0015423	ABC-type maltose transporter activity	GO:0005886	plasma membrane	Nickel transport;Transport;Ion transport;Membrane;Transmembrane helix;Transmembrane;Stress response;Nickel
clpB	Stress-response	1	0.928571	0.911111	1	1	0.944444	0.0555556	0.0555556	-0.0333333	0.0888889	ATP-dependent serine proteinase, heat shock protein				GO:0005524;GO:0016887	ATP binding;ATP hydrolysis activity			ATP-binding;Chaperone;Coiled coil;Nucleotide-binding;Stress response
dnaK__2	Stress-response	0	0	0	0.1	0	0	0.1	0	0	0	Chaperone protein DnaK				GO:0005524;GO:0051082;GO:0140662	ATP binding;unfolded protein binding;ATP-dependent protein folding chaperone			ATP-binding;Chaperone;Coiled coil;Nucleotide-binding;Phosphoprotein;Stress response
ybeY	Toxin-related	1	1	1	1	1	1	0	0	0	0	Endoribonuclease YbeY	3.1.-.-	GO:0006364;GO:0006508	rRNA processing;proteolysis	GO:0004521;GO:0008270;GO:0004222	RNA endonuclease activity;zinc ion binding;metalloendopeptidase activity	GO:0005737	cytoplasm	Protease;Endonuclease;Nuclease;Metal-binding;rRNA processing;Zinc;Metalloprotease;Hydrolase;Ribosome biogenesis;Cytoplasm
pepF	Toxin-related	1	1	1	1	1	1	0	0	0	0	Oligoendopeptidase F	3.4.24.-	GO:0006508	proteolysis	GO:0004222;GO:0046872	metalloendopeptidase activity;metal ion binding	GO:0016020	membrane	Membrane;Hydrolase;Metalloprotease;Transmembrane helix;Zinc;Metal-binding;Protease;Transmembrane
pepF__2	Toxin-related	1	1	0.977778	1	1	1	0	0	-0.0222222	0.0222222	Oligoendopeptidase F	3.4.24.-	GO:0006508	proteolysis	GO:0004222;GO:0046872	metalloendopeptidase activity;metal ion binding			Hydrolase;Metal-binding;Metalloprotease;Protease;Zinc
ftsH	Toxin-related	1	1	1	1	1	1	0	0	0	0	ATP-dependent zinc metalloprotease FtsH	3.4.24.-	GO:0006353;GO:0006508;GO:0030163;GO:0051301	DNA-templated transcription termination;proteolysis;protein catabolic process;cell division	GO:0004176;GO:0004222;GO:0005524;GO:0008237;GO:0008270;GO:0016887	ATP-dependent peptidase activity;metalloendopeptidase activity;ATP binding;metallopeptidase activity;zinc ion binding;ATP hydrolysis activity	GO:0005886	plasma membrane	ATP-binding;Cell cycle;Cell division;Cell membrane;Hydrolase;Metal-binding;Metalloprotease;Nucleotide-binding;Protease;Zinc
zmpC	Toxin-related	1	1	1	1	1	1	0	0	0	0	Peptidase M26 C-terminal domain-containing protein				GO:0008270;GO:0004222	zinc ion binding;metalloendopeptidase activity	GO:0005576	extracellular region	Hydrolase;Protease;Metalloprotease
mpa	Toxin-related	0.75	0.535714	0.755556	1	0.578947	0.583333	0.416667	-0.00438596	0.172222	-0.176608	AAA family ATPase	3.4.24.-	GO:0006508	proteolysis	GO:0005524;GO:0008237;GO:0016887	ATP binding;metallopeptidase activity;ATP hydrolysis activity	GO:0000502	proteasome complex	ATP-binding;Hydrolase;Meiosis;Metalloprotease;Nucleotide-binding;Protease;Proteasome;Zinc
mpa__2	Toxin-related	0.125	0	0	0.1	0	0.0277778	0.0722222	-0.0277778	-0.0277778	0	AAA family ATPase	3.4.24.-;3.6.4.6	GO:0006508	proteolysis	GO:0005524;GO:0008237;GO:0016887	ATP binding;metallopeptidase activity;ATP hydrolysis activity	GO:0000502	proteasome complex	ATP-binding;Hydrolase;Meiosis;Metalloprotease;Nucleotide-binding;Protease;Proteasome;Zinc
ftsH4	Toxin-related	0	0	0	0.1	0	0	0.1	0	0	0	AAA family ATPase	3.4.24.-			GO:0005524;GO:0008237;GO:0016887	ATP binding;metallopeptidase activity;ATP hydrolysis activity			ATP-binding;Metalloprotease;Nucleotide-binding;Zinc
ftsH__2	Toxin-related	0	0	0	0.1	0	0	0.1	0	0	0	AAA family ATPase	3.4.24.-;3.6.4.6	GO:0006508	proteolysis	GO:0005524;GO:0008237;GO:0016887	ATP binding;metallopeptidase activity;ATP hydrolysis activity	GO:0000502	proteasome complex	ATP-binding;Hydrolase;Meiosis;Metalloprotease;Nucleotide-binding;Protease;Proteasome;Zinc
slpA	Toxin-related	0.125	0.107143	0.0222222	0	0.0526316	0.111111	-0.111111	-0.0584795	-0.0888889	0.0304094	AAA ATPase	3.6.4.6;3.4.24.-	GO:0006508	proteolysis	GO:0005524;GO:0016887;GO:0008237	ATP binding;ATP hydrolysis activity;metallopeptidase activity	GO:0000502	proteasome complex	Metalloprotease;Meiosis;Protease;Nucleotide-binding;Zinc;Hydrolase;Proteasome;ATP-binding
sir2	Toxin-related	1	1	1	1	1	1	0	0	0	0	Deacetylase sirtuin-type domain-containing protein	2.4.2.-			GO:0046872;GO:0016757;GO:1990404;GO:0016779	metal ion binding;glycosyltransferase activity;NAD+-protein ADP-ribosyltransferase activity;nucleotidyltransferase activity			Metal-binding;NAD;Zinc
pncB	Toxin-related	1	1	1	1	1	1	0	0	0	0	Nicotinate phosphoribosyltransferase	6.3.4.21;2.4.2.11	GO:0009435	NAD biosynthetic process	GO:0004514;GO:0004516;GO:0016763	nicotinate-nucleotide diphosphorylase (carboxylating) activity;nicotinate phosphoribosyltransferase activity;pentosyltransferase activity			Ligase;Transferase;Pyridine nucleotide biosynthesis;Phosphoprotein;Glycosyltransferase	Cofactor biosynthesis
lgt	Toxin-related	1	1	1	1	1	1	0	0	0	0	Phosphatidylglycerol--prolipoprotein diacylglyceryl transferase	2.4.99.-;2.5.1.145	GO:0042158	lipoprotein biosynthetic process	GO:0008961	phosphatidylglycerol-prolipoprotein diacylglyceryl transferase activity	GO:0005886	plasma membrane	Lipoprotein;Transmembrane;Glycosyltransferase;Transferase;Cell membrane;Membrane;Transmembrane helix	Protein modification
apt	Toxin-related	1	1	1	1	1	1	0	0	0	0	Adenine phosphoribosyltransferase	2.4.2.7	GO:0006166;GO:0006168;GO:0044209	purine ribonucleoside salvage;adenine salvage;AMP salvage	GO:0002055;GO:0052657;GO:0004422;GO:0003999	adenine binding;guanine phosphoribosyltransferase activity;hypoxanthine phosphoribosyltransferase activity;adenine phosphoribosyltransferase activity	GO:0005737	cytoplasm	Cytoplasm;Glycosyltransferase;Transferase;Purine salvage	Purine metabolism
amy	Toxin-related	1	0.964286	1	1	1	0.972222	0.0277778	0.0277778	0.0277778	0	Alpha-amylase	2.4.1.25;3.2.1.1;3.2.1.10	GO:0005975	carbohydrate metabolic process	GO:0004574;GO:0004134;GO:0004556;GO:0043169;GO:0016829;GO:0102500	oligo-1,6-glucosidase activity;4-alpha-glucanotransferase activity;alpha-amylase activity;cation binding;lyase activity;beta-maltose 4-alpha-glucanotransferase activity			Signal;Lyase;Carbohydrate metabolism;Hydrolase;Glycosyltransferase;Glycosidase
upp	Toxin-related	1	1	1	1	1	1	0	0	0	0	UMP pyrophosphorylase	2.4.2.9	GO:0006223;GO:0008655;GO:0044206	uracil salvage;pyrimidine-containing compound salvage;UMP salvage	GO:0000287;GO:0004845;GO:0005525;GO:0016861	magnesium ion binding;uracil phosphoribosyltransferase activity;GTP binding;intramolecular oxidoreductase activity, interconverting aldoses and ketoses			GTP-binding;Glycosyltransferase;Magnesium;Nucleotide-binding;Transferase	Pyrimidine metabolism
deoA	Toxin-related	1	1	1	1	1	1	0	0	0	0	Thymidine phosphorylase	2.4.2.4;2.4.2.2	GO:0006213;GO:0006206	pyrimidine nucleoside metabolic process;pyrimidine nucleobase metabolic process	GO:0009032;GO:0004645;GO:0016154	thymidine phosphorylase activity;1,4-alpha-oligoglucan phosphorylase activity;pyrimidine-nucleoside phosphorylase activity			Glycosyltransferase;Transferase
deoD	Toxin-related	1	1	1	1	1	1	0	0	0	0	Putative purine nucleoside phosphorylase transmembrane protein	2.4.2.1	GO:0042278;GO:0009116;GO:0009164	purine nucleoside metabolic process;nucleoside metabolic process;nucleoside catabolic process	GO:0004731;GO:0016757	purine-nucleoside phosphorylase activity;glycosyltransferase activity			Glycosyltransferase;Membrane;Transmembrane;Plasmid;Transferase
hpt	Toxin-related	1	1	1	1	1	1	0	0	0	0	Hypoxanthine phosphoribosyltransferase	2.4.2.8	GO:0006178;GO:0032263;GO:0046100;GO:0032264;GO:0006166	guanine salvage;GMP salvage;hypoxanthine metabolic process;IMP salvage;purine ribonucleoside salvage	GO:0004422;GO:0000166;GO:0052657;GO:0016757;GO:0046872	hypoxanthine phosphoribosyltransferase activity;nucleotide binding;guanine phosphoribosyltransferase activity;glycosyltransferase activity;metal ion binding	GO:0005737	cytoplasm	Transferase;Purine salvage;Nucleotide-binding;Cytoplasm;Magnesium;Glycosyltransferase;Metal-binding	Purine metabolism
kojP	Toxin-related	1	0.964286	1	0.7	0.947368	0.972222	-0.272222	-0.0248538	0.0277778	-0.0526316	Maltose phosphorylase domain-containing protein	2.4.1.8;2.4.1.230;2.4.1.64;2.4.1.-	GO:0005975	carbohydrate metabolic process	GO:0033831;GO:0030246;GO:0016787;GO:0016757;GO:0050082	kojibiose phosphorylase activity;carbohydrate binding;hydrolase activity;glycosyltransferase activity;maltose phosphorylase activity			Transferase;Plasmid;Hydrolase;Glycosyltransferase
MHR_0269	Toxin-related	1	1	1	1	1	1	0	0	0	0	Glycosyltransferase				GO:0016740	transferase activity			Transferase
MHR_0255	Toxin-related	1	1	1	0.9	1	1	-0.1	0	0	0	Putative DNase/RNase endonuclease				GO:0004519	endonuclease activity			Endonuclease;Hydrolase;Nuclease
dacA	Toxin-related	1	1	1	1	1	1	0	0	0	0	DAC domain-containing protein	2.7.7.85	GO:0019932;GO:0006171	second-messenger-mediated signaling;cAMP biosynthetic process	GO:0016779;GO:0004016;GO:0005524;GO:0106408	nucleotidyltransferase activity;adenylate cyclase activity;ATP binding;diadenylate cyclase activity	GO:0016020	membrane	Nucleotide-binding;ATP-binding;Nucleotidyltransferase;Transmembrane;Membrane;Transmembrane helix;Transferase

## Sheet: Supp table 2B
Supplementary table 2B. Comparative analysis of putative virulence factors using prediction of proteins with signal with SignalP. Genes found >80% prevalence only in strains isolated from the nasal cavity of healthy animals are highlighted in green.
Gene	Prevalence (>80%)	SignalP results		Uniprot annotation
		Prediction	CS Position	Description
amy	All groups	LIPO	CS pos: 26-27. Pr: 0.9953	Alpha-amylase
lppD-2	All groups	LIPO	CS pos: 29-30. Pr: 0.9952	LppD family lipoprotein
mhp466	All groups	LIPO	CS pos: 20-21. Pr: 0.9969	Lipoprotein
MHR_0027	All groups	LIPO	CS pos: 21-22. Pr: 0.9980	Putative lipoprotein
MHR_0061	All groups	LIPO	CS pos: 25-26. Pr: 0.9970	HYPOTHETICAL Uncharacterized lipoprotein MG260
MHR_0136	All groups	LIPO	CS pos: 29-30. Pr: 0.5487	Lipoprotein
MHR_0138	All groups	LIPO	CS pos: 30-31. Pr: 0.9878	Putative lipoprotein
MHR_0227	All groups	LIPO	CS pos: 26-27. Pr: 0.9963	Lipoprotein
MHR_0493	All groups	LIPO	CS pos: 24-25. Pr: 0.9951	Lipoprotein
MHR_0597	All groups	LIPO	CS pos: 26-27. Pr: 0.8246	Signal (membrane)
MHR_0677	All groups	LIPO	CS pos: 25-26. Pr: 0.9954	Lipoprotein
MOS_031	All groups	LIPO	CS pos: 23-24. Pr: 0.9978	Lipoprotein, putative
MOS_070	All groups	LIPO	CS pos: 56-57. Pr: 0.8119	Lipoprotein
MOS_251	All groups	SP	CS pos: 33-34. Pr: 0.4435	Lipoprotein-associated type-17 domain-containing protein
MOS_610	Only in nasal-this study and lung	LIPO	CS pos: 22-23. Pr: 0.9966	Lipoprotein
MOS_630	All groups	LIPO	CS pos: 24-25. Pr: 0.9954	Lipoprotein
MOS_782	All groups	LIPO	CS pos: 26-27. Pr: 0.9955	Lipoprotein
p46	All groups	LIPO	CS pos: 28-29. Pr: 0.8277	46 kDa surface antigen
tmpC	All groups	LIPO	CS pos: 25-26. Pr: 0.9949	ABC transporter xylose-binding lipoprotein
unknown26	All groups	LIPO	CS pos: 27-28. Pr: 0.9958	Hypothetical protein with similarity to other Mycoplasma spp. lipoproteins
unknown38	All groups	LIPO	CS pos: 24-25. Pr: 0.9756	Hypothetical protein (M. hyorhinis)
unknown41	All groups	LIPO	CS pos: 23-24. Pr: 0.9949	Hypothetical protein (M. hyorhinis)
unknown58	All groups	SP	CS pos: 17-18. Pr: 0.6224	Hypothetical protein with similarity to an uncharacterised Mycoplasma spp. protein
unknown67	All groups	LIPO	CS pos: 11-12. Pr: 0.7899	Hypothetical protein (M. hyorhinis)
unknown93	All groups	LIPO	CS pos: 24-25. Pr: 0.9969	Hypothetical protein with similarity to other Mycoplasma spp. lipoproteins
unknown99	Only in nasal-this study	LIPO	CS pos: 30-31. Pr: 0.8917	Hypothetical protein with similarity to other Mycoplasma spp. lipoproteins
vlpA__2	Only in nasal-this study	LIPO	CS pos: 29-30. Pr: 0.9942	Variant surface antigen B
