# Supplementary material for: Exploring the pangenome of Mycoplasma hyorhinis in search of potential virulence markers
Source: Research Square preprint supplement (doi:10.21203/rs.3.rs-7195312/v1), 2025-08-22
Supplement: Supplementary file 4 [file e1513bb9248755c2ae56b14f.xlsx]

## Sheet: Reaction prevalence
Supplementary table 5. Comparative analysis of the reactome infered using genome-scale metabolic models
REACTION				PREVALENCE (RELATIVE FREQUENCY)								FREQUENCY DIFFERENCE
BIGG ID	Reaction name	Reaction	Other IDs	SYSTEMIC / THIS STUDY	NASAL / THIS STUDY	NH CLUSTER	SYSTEMIC / OTHER STUDIES	SYSTEMIC (ALL)	LUNG	NASAL / OTHER STUDIES	OTHER STUDIES (COMBINED)	NASAL THIS STUDY VS SYSTEMIC THIS STUDY	NASAL THIS STUDY VS ALL OTHERS	NH CLUSTER VS ALL SYSTEMIC
R_3NUCLE2	'3 nucleotidase 3 UMP'	3ump_c + h2o_c <-> pi_c + uri_c	RHEA: http://identifiers.org/rhea/27890; RHEA: http://identifiers.org/rhea/27891; RHEA: http://identifiers.org/rhea/27892; RHEA: http://identifiers.org/rhea/27893; EC Number: http://identifiers.org/ec-code/3.1.3.6; BioCyc: http://identifiers.org/biocyc/META:RXN-14115; MetaNetX (MNX) Equation: http://identifiers.org/metanetx.reaction/MNXR94932; KEGG Reaction: http://identifiers.org/kegg.reaction/R…	0.25	0.4	0.5	0.142857	0.166667	0.0666667	0	0.076087	0.15	0.323913	0.333333
R_3NUCLE4	'3 nucleotidase guanosine 3 phosphate'	3gmp_c + h2o_c <-> gsn_c + pi_c	RHEA: http://identifiers.org/rhea/27862; RHEA: http://identifiers.org/rhea/27863; RHEA: http://identifiers.org/rhea/27864; RHEA: http://identifiers.org/rhea/27865; EC Number: http://identifiers.org/ec-code/3.1.3.6; BioCyc: http://identifiers.org/biocyc/META:RXN-14124; MetaNetX (MNX) Equation: http://identifiers.org/metanetx.reaction/MNXR94936; KEGG Reaction: http://identifiers.org/kegg.reaction/R…	0.25	0.5	0.5	0.142857	0.166667	0.2	0.263158	0.195652	0.25	0.304348	0.333333
R_4PEPTabcpp	'Tetrapeptide (LalaDgluMdapDala) transport via ABC system (periplasm)'	atp_c + h2o_c + LalaDgluMdapDala_p <-> LalaDgluMdapDala_c + adp_c + h_c + pi_c	MetaNetX (MNX) Equation: http://identifiers.org/metanetx.reaction/MNXR95050; SEED Reaction: http://identifiers.org/seed.reaction/rxn08008	0.5	1	1	0.0357143	0.138889	0	0	0.0108696	0.5	0.98913	0.861111
R_AAAN	''	acald_c + accoa_c + h_c + nadh_c <-> actn__S_c + coa_c + nad_c		1	1	1	1	1	1	1	1	0	0	0
R_AACPS1	'Acyl-[acyl-carrier-protein] synthetase (n-C14:0)'	ACP_c + atp_c + ttdca_c <-> amp_c + myrsACP_c + ppi_c	EC Number: http://identifiers.org/ec-code/6.2.1.20; MetaNetX (MNX) Equation: http://identifiers.org/metanetx.reaction/MNXR95138	0.625	0.2	0.333333	0.392857	0.444444	0.6	0.315789	0.478261	-0.425	-0.278261	-0.111111
R_AACPS2	'Acyl-[acyl-carrier-protein] synthetase (n-C14:1)'	ACP_c + atp_c + ttdcea_c <-> amp_c + ppi_c + tdeACP_c	EC Number: http://identifiers.org/ec-code/6.2.1.20; MetaNetX (MNX) Equation: http://identifiers.org/metanetx.reaction/MNXR95141	0.75	0.5	0.5	1	0.944444	1	1	1	-0.25	-0.5	-0.444444
R_AACPS3	'Acyl-[acyl-carrier-protein] synthetase (n-C16:0)'	ACP_c + atp_c + hdca_c <-> amp_c + palmACP_c + ppi_c	EC Number: http://identifiers.org/ec-code/6.2.1.20; MetaNetX (MNX) Equation: http://identifiers.org/metanetx.reaction/MNXR95142	1	1	1	1	1	1	1	1	0	0	0
R_AACPS4	'Acyl-[acyl-carrier-protein] synthetase (n-C16:1)'	ACP_c + atp_c + hdcea_c <-> amp_c + hdeACP_c + ppi_c	MetaNetX (MNX) Equation: http://identifiers.org/metanetx.reaction/MNXR95143	1	1	1	1	1	1	1	1	0	0	0
R_AACPS6	'Acyl-[acyl-carrier-protein] synthetase (n-C18:0)'	ACP_c + atp_c + ocdca_c <-> amp_c + ocdcaACP_c + ppi_c	EC Number: http://identifiers.org/ec-code/6.2.1.20; MetaNetX (MNX) Equation: http://identifiers.org/metanetx.reaction/MNXR95145	1	1	1	1	1	1	1	1	0	0	0
R_ACALDt	'Acetaldehyde reversible transport'	acald_e <-> acald_c	MetaNetX (MNX) Equation: http://identifiers.org/metanetx.reaction/MNXR95212; Reactome Reaction: http://identifiers.org/reactome/R-HSA-449872; SEED Reaction: http://identifiers.org/seed.reaction/rxn08032; SEED Reaction: http://identifiers.org/seed.reaction/rxn08033; SEED Reaction: http://identifiers.org/seed.reaction/rxn09700; SEED Reaction: http://identifiers.org/seed.reaction/rxn13212	1	1	1	1	1	1	1	1	0	0	0
R_ACGApts	'N-Acetyl-D-glucosamine transport via PEP:Pyr PTS'	acgam_e + pep_c <-> acgam6p_c + pyr_c	MetaNetX (MNX) Equation: http://identifiers.org/metanetx.reaction/MNXR95253; SEED Reaction: http://identifiers.org/seed.reaction/rxn05485; SEED Reaction: http://identifiers.org/seed.reaction/rxn08041	1	1	1	1	1	1	1	1	0	0	0
R_ACKILE	'2 methylbutanoyl p acyl kinase'	2mb_p_c + adp_c <-> 2mba_c + atp_c		1	1	1	1	1	1	1	1	0	0	0
R_ACKLEU	'Isovaleryl p acyl kinase'	adp_c + iv_p_c <-> 3mba_c + atp_c		1	1	1	1	1	1	1	1	0	0	0
R_ACKVAL	'Isobutyryl p acyl kinase'	adp_c + ib_p_c <-> 2mpa_c + atp_c		1	1	1	1	1	1	1	1	0	0	0
R_ACKr	'Acetate kinase'	ac_c + atp_c <-> actp_c + adp_c	RHEA: http://identifiers.org/rhea/11352; RHEA: http://identifiers.org/rhea/11353; RHEA: http://identifiers.org/rhea/11354; RHEA: http://identifiers.org/rhea/11355; EC Number: http://identifiers.org/ec-code/2.7.2.1; EC Number: http://identifiers.org/ec-code/2.7.2.15; BioCyc: http://identifiers.org/biocyc/META:ACETATEKIN-RXN; MetaNetX (MNX) Equation: http://identifiers.org/metanetx.reaction/MNXR952…	1	1	1	1	1	1	1	1	0	0	0
R_ACLS_a	'Acetolactate synthase'	h_c + pyr_c + thmpp_c <-> co2_c + hethmpp_c	MetaNetX (MNX) Equation: http://identifiers.org/metanetx.reaction/MNXR95272	1	1	1	1	1	1	1	1	0	0	0
R_ACLS_d	'2-alpha-Hydroxyethylthiamine diphosphate lipoamide'	hethmpp_c + lpam_c <-> adhlam_c + thmpp_c		1	1	1	1	1	1	1	1	0	0	0
R_ACMANApts	'N-acetyl-D-mannosamine transport via PTS'	acmana_e + pep_c <-> acmanap_c + pyr_c	MetaNetX (MNX) Equation: http://identifiers.org/metanetx.reaction/MNXR95275; SEED Reaction: http://identifiers.org/seed.reaction/rxn08046; SEED Reaction: http://identifiers.org/seed.reaction/rxn10183	1	1	1	1	1	1	1	1	0	0	0
R_ACNML	'N-Acetylneuraminate lyase'	acnam_c <-> acmana_c + pyr_c	RHEA: http://identifiers.org/rhea/23296; RHEA: http://identifiers.org/rhea/23297; RHEA: http://identifiers.org/rhea/23298; RHEA: http://identifiers.org/rhea/23299; EC Number: http://identifiers.org/ec-code/4.1.3.3; BioCyc: http://identifiers.org/biocyc/META:ACNEULY-RXN; MetaNetX (MNX) Equation: http://identifiers.org/metanetx.reaction/MNXR95296; KEGG Reaction: http://identifiers.org/kegg.reaction…	1	1	1	1	1	1	1	1	0	0	0
R_ACPPAT141	'Acyl-(acyl carrier protein):phosphate acyltransferase (C14:1)'	h_c + pi_c + tdeACP_c <-> ACP_c + ttdceap_c	MetaNetX (MNX) Equation: http://identifiers.org/metanetx.reaction/MNXR95397	0.75	0.5	0.5	1	0.944444	1	1	1	-0.25	-0.5	-0.444444
R_ACPPAT160	'Acyl-(acyl carrier protein):phosphate acyltransferase (C16:0)'	h_c + palmACP_c + pi_c <-> ACP_c + hdcap_c	MetaNetX (MNX) Equation: http://identifiers.org/metanetx.reaction/MNXR95398	0.75	0.9	1	1	0.944444	1	1	1	0.15	-0.1	0.0555556
R_ACPPAT161	'Acyl-(acyl carrier protein):phosphate acyltransferase (C16:1)'	h_c + hdeACP_c + pi_c <-> ACP_c + hdceap_c	MetaNetX (MNX) Equation: http://identifiers.org/metanetx.reaction/MNXR95399	0.75	0.9	1	1	0.944444	1	1	1	0.15	-0.1	0.0555556
R_ACPPAT180	'Acyl-(acyl carrier protein):phosphate acyltransferase (C18:0)'	h_c + ocdcaACP_c + pi_c <-> ACP_c + ocdcap_c	MetaNetX (MNX) Equation: http://identifiers.org/metanetx.reaction/MNXR95400	0.75	0.9	1	1	0.944444	1	1	1	0.15	-0.1	0.0555556
R_ACPS1_1	'CoA:apo-[acyl-carrier-protein] pantetheinephosphotransferase, cytosol'	apoACP_c + coa_c <-> ACP_c + pap_c	EC Number: http://identifiers.org/ec-code/2.7.8.7; MetaNetX (MNX) Equation: http://identifiers.org/metanetx.reaction/MNXR95403; SEED Reaction: http://identifiers.org/seed.reaction/rxn06023	0.875	0.9	0.833333	0.964286	0.944444	0.977778	1	0.978261	0.025	-0.0782609	-0.111111
R_ACPpds	'[acyl-carrier-protein] phosphodiesterase'	ACP_c + h2o_c <-> apoACP_c + h_c + pan4p_c	EC Number: http://identifiers.org/ec-code/3.1.4.14; MetaNetX (MNX) Equation: http://identifiers.org/metanetx.reaction/MNXR95411; SEED Reaction: http://identifiers.org/seed.reaction/rxn06022	0.875	0.9	0.833333	0.964286	0.944444	0.977778	1	0.978261	0.025	-0.0782609	-0.111111
R_ACTD2	'Acetoin dehydrogenase'	actn__R_c + coa_c + nad_c <-> acald_c + accoa_c + h_c + nadh_c	MetaNetX (MNX) Equation: http://identifiers.org/metanetx.reaction/MNXR95420	0.375	0.4	0.333333	0	0.0833333	0	0	0	0.025	0.4	0.25
R_ACTNabc	'Acetoin transport via ABC system'	atp_c + h2o_c + actn__R_e <-> actn__R_c + adp_c + h_c + pi_c	MetaNetX (MNX) Equation: http://identifiers.org/metanetx.reaction/MNXR95424	1	1	1	1	1	1	1	1	0	0	0
R_ACTNabc1	'Acetoin efflux via ABC system'	actn__R_c + atp_c + h2o_c <-> adp_c + h_c + pi_c + actn__R_e	MetaNetX (MNX) Equation: http://identifiers.org/metanetx.reaction/MNXR95425	1	1	1	1	1	1	1	1	0	0	0
R_ADK1	'Adenylate kinase'	amp_c + atp_c <-> 2.0 adp_c	RHEA: http://identifiers.org/rhea/12973; RHEA: http://identifiers.org/rhea/12974; RHEA: http://identifiers.org/rhea/12975; RHEA: http://identifiers.org/rhea/12976; EC Number: http://identifiers.org/ec-code/2.7.4.3; BioCyc: http://identifiers.org/biocyc/META:ADENYL-KIN-RXN; MetaNetX (MNX) Equation: http://identifiers.org/metanetx.reaction/MNXR95450; Reactome Reaction: http://identifiers.org/reacto…	0.875	1	1	1	0.972222	1	1	1	0.125	0	0.0277778
R_ADK2	'Adenylate kinase (Inorganic triphosphate)'	pppi_c + amp_c <-> adp_c + ppi_c	EC Number: http://identifiers.org/ec-code/2.7.4.3; MetaNetX (MNX) Equation: http://identifiers.org/metanetx.reaction/MNXR95451; SEED Reaction: http://identifiers.org/seed.reaction/rxn10052	0.875	1	1	1	0.972222	1	1	1	0.125	0	0.0277778
R_ADK3	'Adentylate kinase (GTP)'	amp_c + gtp_c <-> adp_c + gdp_c	EC Number: http://identifiers.org/ec-code/2.7.4.10; EC Number: http://identifiers.org/ec-code/2.7.4.4; RHEA: http://identifiers.org/rhea/29863; RHEA: http://identifiers.org/rhea/29864; RHEA: http://identifiers.org/rhea/29865; RHEA: http://identifiers.org/rhea/29866; BioCyc: http://identifiers.org/biocyc/META:RXN-14074; MetaNetX (MNX) Equation: http://identifiers.org/metanetx.reaction/MNXR95452; R…	1	1	1	1	1	1	1	1	0	0	0
R_ADK4	'Adentylate kinase (ITP)'	amp_c + itp_c <-> adp_c + idp_c	RHEA: http://identifiers.org/rhea/29867; RHEA: http://identifiers.org/rhea/29868; RHEA: http://identifiers.org/rhea/29869; RHEA: http://identifiers.org/rhea/29870; MetaNetX (MNX) Equation: http://identifiers.org/metanetx.reaction/MNXR95453; SEED Reaction: http://identifiers.org/seed.reaction/rxn08067	1	1	1	1	1	1	1	1	0	0	0
R_ADKd	'Adenylate kinase (d form)'	damp_c + datp_c <-> 2.0 dadp_c	MetaNetX (MNX) Equation: http://identifiers.org/metanetx.reaction/MNXR95454; SEED Reaction: http://identifiers.org/seed.reaction/rxn10427	1	1	1	1	1	1	1	1	0	0	0
R_ADNK1	'Adenosine kinase'	adn_c + atp_c <-> adp_c + amp_c + h_c	EC Number: http://identifiers.org/ec-code/2.7.1.20; EC Number: http://identifiers.org/ec-code/2.7.1.74; RHEA: http://identifiers.org/rhea/20824; RHEA: http://identifiers.org/rhea/20825; RHEA: http://identifiers.org/rhea/20826; RHEA: http://identifiers.org/rhea/20827; BioCyc: http://identifiers.org/biocyc/META:ADENOSINE-KINASE-RXN; MetaNetX (MNX) Equation: http://identifiers.org/metanetx.reaction/…	0.875	1	1	1	0.972222	1	1	1	0.125	0	0.0277778
R_ADPT	'Adenine phosphoribosyltransferase'	ade_c + prpp_c <-> amp_c + ppi_c	RHEA: http://identifiers.org/rhea/16609; RHEA: http://identifiers.org/rhea/16610; RHEA: http://identifiers.org/rhea/16611; RHEA: http://identifiers.org/rhea/16612; EC Number: http://identifiers.org/ec-code/2.4.2.7; EC Number: http://identifiers.org/ec-code/2.4.2.8; BioCyc: http://identifiers.org/biocyc/META:ADENPRIBOSYLTRAN-RXN; MetaNetX (MNX) Equation: http://identifiers.org/metanetx.reaction/MN…	1	1	1	1	1	1	1	1	0	0	0
R_AGDC	'N-acetylglucosamine-6-phosphate deacetylase'	acgam6p_c + h2o_c <-> ac_c + gam6p_c	RHEA: http://identifiers.org/rhea/22936; RHEA: http://identifiers.org/rhea/22937; RHEA: http://identifiers.org/rhea/22938; RHEA: http://identifiers.org/rhea/22939; EC Number: http://identifiers.org/ec-code/3.5.1.25; BioCyc: http://identifiers.org/biocyc/META:NAG6PDEACET-RXN; MetaNetX (MNX) Equation: http://identifiers.org/metanetx.reaction/MNXR95528; KEGG Reaction: http://identifiers.org/kegg.rea…	1	1	1	0.928571	0.944444	0.933333	0.947368	0.934783	0	0.0652174	0.0555556
R_AGPAT160	'1-hexadecanoyl-sn-glycerol 3-phosphate O-acyltransferase (n-C16:0)'	1hdecg3p_c + palmACP_c <-> ACP_c + pa160_c	EC Number: http://identifiers.org/ec-code/2.3.1.51; MetaNetX (MNX) Equation: http://identifiers.org/metanetx.reaction/MNXR95561	1	1	1	1	1	1	1	1	0	0	0
R_AGPAT161	'1-hexadec-7-enoyl-sn-glycerol 3-phosphate O-acyltransferase (n-C16:1)'	1hdec9eg3p_c + hdeACP_c <-> ACP_c + pa161_c	EC Number: http://identifiers.org/ec-code/2.3.1.51; MetaNetX (MNX) Equation: http://identifiers.org/metanetx.reaction/MNXR95564	1	1	1	1	1	1	1	1	0	0	0
R_AGPAT180	'1-octadecanoyl-sn-glycerol 3-phosphate O-acyltransferase (n-C18:0)'	1odecg3p_c + ocdcaACP_c <-> ACP_c + pa180_c	EC Number: http://identifiers.org/ec-code/2.3.1.51; MetaNetX (MNX) Equation: http://identifiers.org/metanetx.reaction/MNXR95565	1	1	1	1	1	1	1	1	0	0	0
R_AGPOP	'DGTP:pyruvate 2-O-phosphotransferase, cytosol'	dgdp_c + h_c + pep_c <-> dgtp_c + pyr_c	EC Number: http://identifiers.org/ec-code/2.7.1.40; RHEA: http://identifiers.org/rhea/30791; RHEA: http://identifiers.org/rhea/30792; RHEA: http://identifiers.org/rhea/30793; RHEA: http://identifiers.org/rhea/30794; BioCyc: http://identifiers.org/biocyc/META:RXN-14207; MetaNetX (MNX) Equation: http://identifiers.org/metanetx.reaction/MNXR95613; KEGG Reaction: http://identifiers.org/kegg.reaction/…	1	0.9	0.833333	1	1	1	1	1	-0.1	-0.1	-0.166667
R_AHCYSNS	'S-adenosylhomocysteine nucleosidase'	ahcys_c + h2o_c <-> ade_c + rhcys_c	RHEA: http://identifiers.org/rhea/17805; RHEA: http://identifiers.org/rhea/17806; RHEA: http://identifiers.org/rhea/17807; RHEA: http://identifiers.org/rhea/17808; EC Number: http://identifiers.org/ec-code/3.2.2.9; BioCyc: http://identifiers.org/biocyc/META:ADENOSYLHOMOCYSTEINE-NUCLEOSIDASE-RXN; MetaNetX (MNX) Equation: http://identifiers.org/metanetx.reaction/MNXR95625; KEGG Reaction: http://ide…	1	0.8	0.833333	1	1	1	1	1	-0.2	-0.2	-0.166667
R_AKGDH	'2-Oxogluterate dehydrogenase'	akg_c + coa_c + nad_c <-> co2_c + nadh_c + succoa_c	EC Number: http://identifiers.org/ec-code/1.2.1.52; EC Number: http://identifiers.org/ec-code/1.2.4.2; EC Number: http://identifiers.org/ec-code/1.8.1.4; EC Number: http://identifiers.org/ec-code/2.3.1.61; RHEA: http://identifiers.org/rhea/27786; RHEA: http://identifiers.org/rhea/27787; RHEA: http://identifiers.org/rhea/27788; RHEA: http://identifiers.org/rhea/27789; BioCyc: http://identifiers.or…	1	1	1	1	1	1	1	1	0	0	0
R_ALAALAabcpp	'D-alanyl-D-alanine (DalaDala) transport via ABC system (periplasm)'	atp_c + h2o_c + alaala_p <-> adp_c + alaala_c + h_c + pi_c	MetaNetX (MNX) Equation: http://identifiers.org/metanetx.reaction/MNXR95677; SEED Reaction: http://identifiers.org/seed.reaction/rxn08098	0.875	1	1	0.25	0.388889	0.4	0.315789	0.336957	0.125	0.663043	0.611111
R_ALATA_D2	'D-alanine transaminase'	ala__D_c + pydx5p_c <-> pyam5p_c + pyr_c	RHEA: http://identifiers.org/rhea/28562; RHEA: http://identifiers.org/rhea/28563; RHEA: http://identifiers.org/rhea/28564; RHEA: http://identifiers.org/rhea/28565; BioCyc: http://identifiers.org/biocyc/META:RXN0-5240; MetaNetX (MNX) Equation: http://identifiers.org/metanetx.reaction/MNXR95697; KEGG Reaction: http://identifiers.org/kegg.reaction/R01147; SEED Reaction: http://identifiers.org/seed.r…	1	1	1	1	1	1	1	1	0	0	0
R_ALATA_L2	'Alanine transaminase'	ala__L_c + pydx5p_c <-> pyam5p_c + pyr_c	RHEA: http://identifiers.org/rhea/30023; RHEA: http://identifiers.org/rhea/30024; RHEA: http://identifiers.org/rhea/30025; RHEA: http://identifiers.org/rhea/30026; MetaNetX (MNX) Equation: http://identifiers.org/metanetx.reaction/MNXR95699; SEED Reaction: http://identifiers.org/seed.reaction/rxn08103	1	1	1	1	1	1	1	1	0	0	0
R_ALAabc	'L-alanine transport via ABC system'	ala__L_e + atp_c + h2o_c <-> adp_c + ala__L_c + h_c + pi_c	MetaNetX (MNX) Equation: http://identifiers.org/metanetx.reaction/MNXR95703; SEED Reaction: http://identifiers.org/seed.reaction/rxn08097; SEED Reaction: http://identifiers.org/seed.reaction/rxn10170	1	1	1	1	1	1	1	1	0	0	0
R_AMANAPEr	'N-acetylmannosamine 6-phosphate epimerase'	acmanap_c <-> acgam6p_c	RHEA: http://identifiers.org/rhea/25257; RHEA: http://identifiers.org/rhea/25258; RHEA: http://identifiers.org/rhea/25259; RHEA: http://identifiers.org/rhea/25260; EC Number: http://identifiers.org/ec-code/5.1.3.9; BioCyc: http://identifiers.org/biocyc/META:NANE-RXN; MetaNetX (MNX) Equation: http://identifiers.org/metanetx.reaction/MNXR95804; KEGG Reaction: http://identifiers.org/kegg.reaction/R0…	1	1	1	1	1	1	1	1	0	0	0
R_AMPEP1	'Aminopeptidase'	gly_asn__L_c + h2o_c <-> asn__L_c + gly_c		1	1	1	1	1	1	1	1	0	0	0
R_AMPEP10	'Aminopeptidase'	gly_asp__L_c + h2o_c <-> asp__L_c + gly_c		1	1	1	1	1	1	1	1	0	0	0
R_AMPEP11	'Aminopeptidase'	gly_pro__L_c + h2o_c <-> gly_c + h_c + pro__L_c		1	1	1	1	1	1	1	1	0	0	0
R_AMPEP12	'Aminopeptidase'	ala_gln_c + h2o_c <-> ala__L_c + gln__L_c		1	1	1	1	1	1	1	1	0	0	0
R_AMPEP13	'Aminopeptidase'	ala_L_asp__L_c + h2o_c <-> ala__L_c + asp__L_c		1	1	1	1	1	1	1	1	0	0	0
R_AMPEP14	'Aminopeptidase'	h2o_c + h_c + met_L_ala__L_c <-> ala__L_c + met__L_c		1	1	1	1	1	1	1	1	0	0	0
R_AMPEP15	'Aminopeptidase'	h2o_c + prohisglu_c <-> glu__L_c + his__L_c + pro__L_c		1	1	1	1	1	1	1	1	0	0	0
R_AMPEP16	'Aminopeptidase'	h2o_c + lysglugly_c <-> glu__L_c + gly_c + lys__L_c		1	1	1	1	1	1	1	1	0	0	0
R_AMPEP17	'Aminopeptidase'	glyglygln_c + h2o_c <-> gln__L_c + 2.0 gly_c		1	1	1	1	1	1	1	1	0	0	0
R_AMPEP18	'Aminopeptidase'	h2o_c + serglugly_c <-> glu__L_c + gly_c + ser__L_c		1	1	1	1	1	1	1	1	0	0	0
R_AMPEP2	'Aminopeptidase'	ala_L_thr__L_c + h2o_c <-> ala__L_c + thr__L_c		1	1	1	1	1	1	1	1	0	0	0
R_AMPEP3	'Aminopeptidase'	gly_gln_c + h2o_c <-> gln__L_c + gly_c		1	1	1	1	1	1	1	1	0	0	0
R_AMPEP4	'Aminopeptidase'	alagly_c + h2o_c <-> ala__L_c + gly_c		1	1	1	1	1	1	1	1	0	0	0
R_AMPEP5	'Aminopeptidase'	ala_L_glu__L_c + h2o_c <-> ala__L_c + glu__L_c		1	1	1	1	1	1	1	1	0	0	0
R_AMPEP6	'Aminopeptidase'	ala_leu_c + h2o_c <-> ala__L_c + leu__L_c		1	1	1	1	1	1	1	1	0	0	0
R_AMPEP7	'Aminopeptidase'	ala_his_c + h2o_c <-> ala__L_c + his__L_c		1	1	1	1	1	1	1	1	0	0	0
R_AMPEP8	'Aminopeptidase'	gly_glu__L_c + h2o_c <-> glu__L_c + gly_c		1	1	1	1	1	1	1	1	0	0	0
R_AMPEP9	'Aminopeptidase'	gly_met_c + h2o_c <-> gly_c + met__L_c		1	1	1	1	1	1	1	1	0	0	0
R_AMPTASEAH	'Aminopeptidase Ala His'	alahis_c + h2o_c <-> ala__L_c + his__L_c		0.25	0.5	0.5	0	0.0555556	0	0	0	0.25	0.5	0.444444
R_AMPTASEAL	'Aminopeptidase Ala Leu'	alaleu_c + h2o_c <-> ala__L_c + leu__L_c		0.25	0.5	0.5	0	0.0555556	0	0	0	0.25	0.5	0.444444
R_AMPTASEAT	'Aminopeptidase Ala Thr'	alathr_c + h2o_c <-> ala__L_c + thr__L_c		0.25	0.5	0.5	0	0.0555556	0	0	0	0.25	0.5	0.444444
R_AMPTASEATRP	'Aminopeptidase Ala Trp'	alatrp_c + h2o_c <-> ala__L_c + trp__L_c		0.25	0.7	0.833333	0	0.0555556	0	0	0	0.45	0.7	0.777778
R_AMPTASECG	'Alanyl aminopeptidase (cys-gly)'	cgly_c + h2o_c <-> cys__L_c + gly_c	RHEA: http://identifiers.org/rhea/28783; RHEA: http://identifiers.org/rhea/28784; RHEA: http://identifiers.org/rhea/28785; RHEA: http://identifiers.org/rhea/28786; EC Number: http://identifiers.org/ec-code/3.4.11.1; EC Number: http://identifiers.org/ec-code/3.4.11.2; EC Number: http://identifiers.org/ec-code/3.4.11.23; EC Number: http://identifiers.org/ec-code/3.4.13.-; EC Number: http://identifi…	1	1	1	1	1	1	1	1	0	0	0
R_AMPTASEGGLN	'Aminopeptidase Gly Gln'	glygln_c + h2o_c <-> gln__L_c + gly_c		0.25	0.6	0.666667	0	0.0555556	0	0	0	0.35	0.6	0.611111
R_AMPTASEGM	'Aminopeptidase Gly Met'	glymet_c + h2o_c <-> gly_c + met__L_c		0.25	0.5	0.5	0	0.0555556	0	0	0	0.25	0.5	0.444444
R_AMPTASEHH	'Aminopeptidase His His'	h2o_c + hishis_c <-> 2.0 his__L_c		0.25	0.6	0.666667	0	0.0555556	0	0	0	0.35	0.6	0.611111
R_AMPTASEPG	'Aminopeptidase (pro-gly)'	h2o_c + progly_c <-> gly_c + pro__L_c	RHEA: http://identifiers.org/rhea/28799; RHEA: http://identifiers.org/rhea/28800; RHEA: http://identifiers.org/rhea/28801; RHEA: http://identifiers.org/rhea/28802; MetaNetX (MNX) Equation: http://identifiers.org/metanetx.reaction/MNXR95829; SEED Reaction: http://identifiers.org/seed.reaction/rxn08133	0.375	0.9	1	0	0.0833333	0.0222222	0	0.0108696	0.525	0.88913	0.916667
R_AP4AS	'Ap4A synthetase'	2.0 atp_c + h_c <-> ap4a_c + ppi_c	EC Number: http://identifiers.org/ec-code/2.7.7; RHEA: http://identifiers.org/rhea/34935; RHEA: http://identifiers.org/rhea/34936; RHEA: http://identifiers.org/rhea/34937; RHEA: http://identifiers.org/rhea/34938; BioCyc: http://identifiers.org/biocyc/META:RXN0-5208; MetaNetX (MNX) Equation: http://identifiers.org/metanetx.reaction/MNXR95858	0.375	0.7	0.666667	0	0.0833333	0	0	0	0.325	0.7	0.583333
R_APG3PAT141	'Acyl-phosphate:glycerol-3-phosphate acyltransferase (C14:1)'	glyc3p_c + ttdceap_c <-> 1tdec7eg3p_c + h_c + pi_c	MetaNetX (MNX) Equation: http://identifiers.org/metanetx.reaction/MNXR95871	0.625	0.4	0.333333	0.892857	0.833333	0.822222	0.894737	0.858696	-0.225	-0.458696	-0.5
R_APG3PAT160	'Acyl-phosphate:glycerol-3-phosphate acyltransferase (C16:0)'	glyc3p_c + hdcap_c <-> 1hdecg3p_c + h_c + pi_c	MetaNetX (MNX) Equation: http://identifiers.org/metanetx.reaction/MNXR95872	0.75	0.8	0.833333	0.964286	0.916667	1	0.947368	0.978261	0.05	-0.178261	-0.0833333
R_APG3PAT161	'Acyl-phosphate:glycerol-3-phosphate acyltransferase (C16:1)'	glyc3p_c + hdceap_c <-> 1hdec9eg3p_c + h_c + pi_c	MetaNetX (MNX) Equation: http://identifiers.org/metanetx.reaction/MNXR95873	0.75	0.9	1	0.964286	0.916667	0.933333	0.947368	0.945652	0.15	-0.0456522	0.0833333
R_APG3PAT180	'Acyl-phosphate:glycerol-3-phosphate acyltransferase (C18:0)'	glyc3p_c + ocdcap_c <-> 1odecg3p_c + h_c + pi_c	MetaNetX (MNX) Equation: http://identifiers.org/metanetx.reaction/MNXR95874	0.75	0.8	0.833333	0.964286	0.916667	1	1	0.98913	0.05	-0.18913	-0.0833333
R_ARBTpts	'Arbutin transport via PEPPyr PTS'	pep_c + arbt_e <-> arbt6p_c + pyr_c	RHEA: http://identifiers.org/rhea/34943; RHEA: http://identifiers.org/rhea/34944; RHEA: http://identifiers.org/rhea/34945; RHEA: http://identifiers.org/rhea/34946; MetaNetX (MNX) Equation: http://identifiers.org/metanetx.reaction/MNXR95932; SEED Reaction: http://identifiers.org/seed.reaction/rxn05501	1	1	1	1	1	1	1	1	0	0	0
R_ARBabc	'L-arabinose transport via ABC system'	h2o_c + atp_c + arab__L_e <-> adp_c + h_c + arab__L_c + pi_c	EC Number: http://identifiers.org/ec-code/3.6.3.17; BioCyc: http://identifiers.org/biocyc/META:ABC-2-RXN; MetaNetX (MNX) Equation: http://identifiers.org/metanetx.reaction/MNXR95935	0.875	0.9	0.833333	0.964286	0.944444	0.977778	1	0.978261	0.025	-0.0782609	-0.111111
R_ARGabc	'L-arginine transport via ABC system'	arg__L_e + atp_c + h2o_c <-> adp_c + arg__L_c + h_c + pi_c	RHEA: http://identifiers.org/rhea/29879#1; RHEA: http://identifiers.org/rhea/29880#1; RHEA: http://identifiers.org/rhea/29881#1; RHEA: http://identifiers.org/rhea/29882#1; EC Number: http://identifiers.org/ec-code/3.6.3.21; BioCyc: http://identifiers.org/biocyc/META:ABC-4-RXN; MetaNetX (MNX) Equation: http://identifiers.org/metanetx.reaction/MNXR95952; SEED Reaction: http://identifiers.org/seed.r…	1	1	1	1	1	1	1	1	0	0	0
R_ARGabcpp	'L-arginine transport via ABC system (periplasm)'	atp_c + h2o_c + arg__L_p <-> adp_c + arg__L_c + h_c + pi_c	RHEA: http://identifiers.org/rhea/29879#1; RHEA: http://identifiers.org/rhea/29880#1; RHEA: http://identifiers.org/rhea/29881#1; RHEA: http://identifiers.org/rhea/29882#1; EC Number: http://identifiers.org/ec-code/3.6.3.21; BioCyc: http://identifiers.org/biocyc/META:ABC-4-RXN; MetaNetX (MNX) Equation: http://identifiers.org/metanetx.reaction/MNXR95952; SEED Reaction: http://identifiers.org/seed.r…	1	0.9	0.833333	0.964286	0.972222	1	1	0.98913	-0.1	-0.0891304	-0.138889
R_ASCBpts	'L-ascorbate transport via PEP:Pyr PTS'	ascb__L_e + pep_c <-> ascb6p_c + pyr_c		1	1	1	1	1	1	1	1	0	0	0
R_ASNS2	'Asparagine synthetase'	asp__L_c + atp_c + nh4_c <-> amp_c + asn__L_c + h_c + ppi_c	RHEA: http://identifiers.org/rhea/11372; RHEA: http://identifiers.org/rhea/11373; RHEA: http://identifiers.org/rhea/11374; RHEA: http://identifiers.org/rhea/11375; EC Number: http://identifiers.org/ec-code/6.3.1.1; EC Number: http://identifiers.org/ec-code/6.3.5.4; BioCyc: http://identifiers.org/biocyc/META:ASNSYNA-RXN; MetaNetX (MNX) Equation: http://identifiers.org/metanetx.reaction/MNXR96060; …	1	1	1	1	1	1	1	1	0	0	0
R_ASNabc	'L-asparagine transport via ABC system'	asn__L_e + h2o_c + atp_c <-> asn__L_c + adp_c + pi_c + h_c	MetaNetX (MNX) Equation: http://identifiers.org/metanetx.reaction/MNXR96065; SEED Reaction: http://identifiers.org/seed.reaction/rxn08160; SEED Reaction: http://identifiers.org/seed.reaction/rxn10144	1	1	1	1	1	1	1	1	0	0	0
R_ASPabc	'L-aspartate transport via ABC system'	asp__L_e + atp_c + h2o_c <-> adp_c + asp__L_c + h_c + pi_c	RHEA: http://identifiers.org/rhea/29039#1; RHEA: http://identifiers.org/rhea/29040#1; RHEA: http://identifiers.org/rhea/29041#1; RHEA: http://identifiers.org/rhea/29042#1; EC Number: http://identifiers.org/ec-code/3.6.3.21; BioCyc: http://identifiers.org/biocyc/META:TRANS-RXN0-222; MetaNetX (MNX) Equation: http://identifiers.org/metanetx.reaction/MNXR96103; SEED Reaction: http://identifiers.org/s…	1	1	1	1	1	1	1	1	0	0	0
R_ATPS4rpp	'ATP synthase (four protons for one ATP) (periplasm)'	adp_c + pi_c + 4.0 h_p <-> atp_c + 3.0 h_c + h2o_c	EC Number: http://identifiers.org/ec-code/3.6.3.14; BioCyc: http://identifiers.org/biocyc/META:ATPSYN-RXN; MetaNetX (MNX) Equation: http://identifiers.org/metanetx.reaction/MNXR96136; SEED Reaction: http://identifiers.org/seed.reaction/rxn08173; SEED Reaction: http://identifiers.org/seed.reaction/rxn10042	1	1	1	1	1	1	1	1	0	0	0
R_BTNt	'Biotin ABC transporter'	atp_c + btn_e + h2o_c <-> adp_c + btn_c + h_c + pi_c		1	1	1	0.964286	0.972222	1	1	0.98913	0	0.0108696	0.0277778
R_CA2abc	'Calcium transport via ABC system'	h2o_c + atp_c + ca2_e <-> h_c + ca2_c + pi_c + adp_c	RHEA: http://identifiers.org/rhea/18105#2; RHEA: http://identifiers.org/rhea/18106#2; RHEA: http://identifiers.org/rhea/18107#2; RHEA: http://identifiers.org/rhea/18108#2; EC Number: http://identifiers.org/ec-code/3.6.3; EC Number: http://identifiers.org/ec-code/3.6.3.8; BioCyc: http://identifiers.org/biocyc/META:TRANS-RXN-193; MetaNetX (MNX) Equation: http://identifiers.org/metanetx.reaction/MNX…	1	0.9	0.833333	0.964286	0.972222	1	1	0.98913	-0.1	-0.0891304	-0.138889
R_CA2abc1	'Calcium efflux via ABC system'	atp_c + ca2_c + h2o_c <-> adp_c + h_c + pi_c + ca2_e	RHEA: http://identifiers.org/rhea/18105#1; RHEA: http://identifiers.org/rhea/18106#1; RHEA: http://identifiers.org/rhea/18107#1; RHEA: http://identifiers.org/rhea/18108#1; EC Number: http://identifiers.org/ec-code/3.6.3; EC Number: http://identifiers.org/ec-code/3.6.3.8; BioCyc: http://identifiers.org/biocyc/META:3.6.3.8-RXN; BioCyc: http://identifiers.org/biocyc/META:TRANS-RXN-194; MetaNetX (MNX…	0.375	0.9	0.833333	0	0.0833333	0.0222222	0	0.0108696	0.525	0.88913	0.75
R_CA2abcpp	'Calcium transport via ABC system (periplasm)'	atp_c + h2o_c + ca2_p <-> adp_c + ca2_c + h_c + pi_c	RHEA: http://identifiers.org/rhea/18105#2; RHEA: http://identifiers.org/rhea/18106#2; RHEA: http://identifiers.org/rhea/18107#2; RHEA: http://identifiers.org/rhea/18108#2; EC Number: http://identifiers.org/ec-code/3.6.3; EC Number: http://identifiers.org/ec-code/3.6.3.8; BioCyc: http://identifiers.org/biocyc/META:TRANS-RXN-193; MetaNetX (MNX) Equation: http://identifiers.org/metanetx.reaction/MNX…	0.25	0.4	0.333333	0	0.0555556	0	0	0	0.15	0.4	0.277778
R_CELBpts	'Cellobiose transport via PEPPyr PTS'	pep_c + cellb_e <-> 6pgg_c + pyr_c	MetaNetX (MNX) Equation: http://identifiers.org/metanetx.reaction/MNXR96586	1	1	1	1	1	1	1	1	0	0	0
R_CGLYabcpp	'L-Cysteinylglycine (Cys-Gly) transport via ABC system (periplasm)'	atp_c + h2o_c + cgly_p <-> adp_c + cgly_c + h_c + pi_c	MetaNetX (MNX) Equation: http://identifiers.org/metanetx.reaction/MNXR96656; SEED Reaction: http://identifiers.org/seed.reaction/rxn05539; SEED Reaction: http://identifiers.org/seed.reaction/rxn08210	0.25	0.8	1	0	0.0555556	0.0222222	0	0.0108696	0.55	0.78913	0.944444
R_CHLabc	'Choline transport via ABC system'	atp_c + chol_e + h2o_c <-> adp_c + chol_c + h_c + pi_c	RHEA: http://identifiers.org/rhea/38715#1; RHEA: http://identifiers.org/rhea/38716#1; RHEA: http://identifiers.org/rhea/38717#1; RHEA: http://identifiers.org/rhea/38718#1; MetaNetX (MNX) Equation: http://identifiers.org/metanetx.reaction/MNXR96691; SEED Reaction: http://identifiers.org/seed.reaction/rxn05159; SEED Reaction: http://identifiers.org/seed.reaction/rxn08212	0.5	0.6	0.666667	0.0357143	0.138889	0.133333	0.210526	0.119565	0.1	0.480435	0.527778
R_CHLabcpp	'Choline transport via ABC system (periplasm)'	atp_c + h2o_c + chol_p <-> adp_c + chol_c + h_c + pi_c	RHEA: http://identifiers.org/rhea/38715#1; RHEA: http://identifiers.org/rhea/38716#1; RHEA: http://identifiers.org/rhea/38717#1; RHEA: http://identifiers.org/rhea/38718#1; MetaNetX (MNX) Equation: http://identifiers.org/metanetx.reaction/MNXR96691; SEED Reaction: http://identifiers.org/seed.reaction/rxn05159; SEED Reaction: http://identifiers.org/seed.reaction/rxn08212	0.5	0.5	0.5	0.0357143	0.138889	0.0888889	0.210526	0.0978261	0	0.402174	0.361111
R_CLPNS120pp	'Cardiolipin synthase (periplasmic, n-C12:0)'	2.0 pg120_p <-> clpn120_p + glyc_p	MetaNetX (MNX) Equation: http://identifiers.org/metanetx.reaction/MNXR96781	0.5	0.3	0	0.142857	0.222222	0.133333	0.105263	0.130435	-0.2	0.169565	-0.222222
R_CLPNS140pp	'Cardiolipin synthase (periplasmic, n-C14:0)'	2.0 pg140_p <-> clpn140_p + glyc_p	MetaNetX (MNX) Equation: http://identifiers.org/metanetx.reaction/MNXR96782	0.625	0.1	0	0.142857	0.25	0.133333	0.157895	0.141304	-0.525	-0.0413043	-0.25
R_CLPNS160	'Cardiolipin synthase (n-C16:0)'	2.0 pg160_c <-> clpn160_c + glyc_c	MetaNetX (MNX) Equation: http://identifiers.org/metanetx.reaction/MNXR96784; SEED Reaction: http://identifiers.org/seed.reaction/rxn08229	1	0.9	0.833333	1	1	1	0.947368	0.98913	-0.1	-0.0891304	-0.166667
R_CLPNS181pp	'Cardiolipin synthase (periplasmic, n-C18:1)'	2.0 pg181_p <-> clpn181_p + glyc_p	MetaNetX (MNX) Equation: http://identifiers.org/metanetx.reaction/MNXR96788	0.5	0.3	0.166667	0.0714286	0.166667	0.0888889	0.105263	0.0869565	-0.2	0.213043	0
R_CLPNS2_BS	'Cardiolipin synthase'	0.02 pgly_BS_c <-> 0.01 cdlp_BS_c + glyc_c	MetaNetX (MNX) Equation: http://identifiers.org/metanetx.reaction/MNXR142710	1	1	1	1	1	1	1	1	0	0	0
R_CO2t	'CO2 transporter via diffusion'	co2_e <-> co2_c	BioCyc: http://identifiers.org/biocyc/META:TRANS-RXN0-545; MetaNetX (MNX) Equation: http://identifiers.org/metanetx.reaction/MNXR96810; Reactome Reaction: http://identifiers.org/reactome/R-ATH-1237042; Reactome Reaction: http://identifiers.org/reactome/R-ATH-1247649; Reactome Reaction: http://identifiers.org/reactome/R-BTA-1237042; Reactome Reaction: http://identifiers.org/reactome/R-BTA-1237069;…	1	1	1	1	1	1	0.947368	0.98913	0	0.0108696	0
R_CO2tex	'CO2 transport via diffusion (extracellular to periplasm)'	co2_e <-> co2_p	BioCyc: http://identifiers.org/biocyc/META:TRANS-RXN0-545; MetaNetX (MNX) Equation: http://identifiers.org/metanetx.reaction/MNXR96810; Reactome Reaction: http://identifiers.org/reactome/R-ATH-1237042; Reactome Reaction: http://identifiers.org/reactome/R-ATH-1247649; Reactome Reaction: http://identifiers.org/reactome/R-BTA-1237042; Reactome Reaction: http://identifiers.org/reactome/R-BTA-1237069;…	1	0.9	1	0.964286	0.972222	0.933333	1	0.956522	-0.1	-0.0565217	0.0277778
R_CO2tpp	'CO2 transporter via diffusion (periplasm)'	co2_p <-> co2_c	BioCyc: http://identifiers.org/biocyc/META:TRANS-RXN0-545; MetaNetX (MNX) Equation: http://identifiers.org/metanetx.reaction/MNXR96810; Reactome Reaction: http://identifiers.org/reactome/R-ATH-1237042; Reactome Reaction: http://identifiers.org/reactome/R-ATH-1247649; Reactome Reaction: http://identifiers.org/reactome/R-BTA-1237042; Reactome Reaction: http://identifiers.org/reactome/R-BTA-1237069;…	1	1	1	0.964286	0.972222	0.933333	0.947368	0.945652	0	0.0543478	0.0277778
R_COabc	'Cobalt transport via ABC system'	atp_c + cobalt2_e + h2o_c <-> adp_c + cobalt2_c + h_c + pi_c	RHEA: http://identifiers.org/rhea/32779#1; RHEA: http://identifiers.org/rhea/32780#1; RHEA: http://identifiers.org/rhea/32781#1; RHEA: http://identifiers.org/rhea/32782#1; MetaNetX (MNX) Equation: http://identifiers.org/metanetx.reaction/MNXR96862; SEED Reaction: http://identifiers.org/seed.reaction/rxn05166	1	1	1	1	1	1	1	1	0	0	0
R_CRO4abcpp	'Chromate transport via ABC system (periplasm)'	atp_c + h2o_c + cro4_p <-> adp_c + cro4_c + h_c + pi_c	MetaNetX (MNX) Equation: http://identifiers.org/metanetx.reaction/MNXR96912	1	1	1	1	1	1	1	1	0	0	0
R_CRO4t3pp	'Chromate transport out via proton antiport (cytoplasm to periplasm)'	cro4_c + h_p <-> h_c + cro4_p	MetaNetX (MNX) Equation: http://identifiers.org/metanetx.reaction/MNXR96913; SEED Reaction: http://identifiers.org/seed.reaction/rxn05526	1	1	1	0.892857	0.916667	0.977778	0.947368	0.945652	0	0.0543478	0.0833333
R_CTPS1	'CTP synthase NH3'	atp_c + nh4_c + utp_c <-> adp_c + ctp_c + 2.0 h_c + pi_c	RHEA: http://identifiers.org/rhea/16597; RHEA: http://identifiers.org/rhea/16598; RHEA: http://identifiers.org/rhea/16599; RHEA: http://identifiers.org/rhea/16600; EC Number: http://identifiers.org/ec-code/6.3.4.2; BioCyc: http://identifiers.org/biocyc/META:RXN-14325; MetaNetX (MNX) Equation: http://identifiers.org/metanetx.reaction/MNXR96944; KEGG Reaction: http://identifiers.org/kegg.reaction/R…	1	1	1	1	1	1	1	1	0	0	0
R_CTPS1_2	'CTP synthase (NH3)'	atp_c + nh3_c + utp_c <-> adp_c + ctp_c + h_c + pi_c		1	1	1	1	1	1	1	1	0	0	0
R_CTPS2	'CTP synthase (glutamine)'	atp_c + gln__L_c + h2o_c + utp_c <-> adp_c + ctp_c + glu__L_c + 2.0 h_c + pi_c	RHEA: http://identifiers.org/rhea/26426; RHEA: http://identifiers.org/rhea/26427; RHEA: http://identifiers.org/rhea/26428; RHEA: http://identifiers.org/rhea/26429; EC Number: http://identifiers.org/ec-code/6.3.4.2; BioCyc: http://identifiers.org/biocyc/META:CTPSYN-RXN; MetaNetX (MNX) Equation: http://identifiers.org/metanetx.reaction/MNXR96945; Reactome Reaction: http://identifiers.org/reactome/R…	1	1	1	1	1	1	1	1	0	0	0
R_CYSabc	'L-cysteine transport via ABC system'	atp_c + cys__L_e + h2o_c <-> adp_c + cys__L_c + h_c + pi_c	RHEA: http://identifiers.org/rhea/29783#2; RHEA: http://identifiers.org/rhea/29784#2; RHEA: http://identifiers.org/rhea/29785#2; RHEA: http://identifiers.org/rhea/29786#2; EC Number: http://identifiers.org/ec-code/3.6.3.21; RHEA: http://identifiers.org/rhea/32795#1; RHEA: http://identifiers.org/rhea/32796#1; RHEA: http://identifiers.org/rhea/32797#1; RHEA: http://identifiers.org/rhea/32798#1; Bio…	1	1	1	1	1	1	1	1	0	0	0
R_CYSabc2pp	'L-cysteine export via ABC system (cytoplasm to periplasm)'	atp_c + cys__L_c + h2o_c <-> adp_c + h_c + pi_c + cys__L_p	RHEA: http://identifiers.org/rhea/29783#1; RHEA: http://identifiers.org/rhea/29784#1; RHEA: http://identifiers.org/rhea/29785#1; RHEA: http://identifiers.org/rhea/29786#1; EC Number: http://identifiers.org/ec-code/3.6.3.21; RHEA: http://identifiers.org/rhea/32795#2; RHEA: http://identifiers.org/rhea/32796#2; RHEA: http://identifiers.org/rhea/32797#2; RHEA: http://identifiers.org/rhea/32798#2; Bio…	1	1	1	0.964286	0.972222	0.822222	0.947368	0.891304	0	0.108696	0.0277778
R_CYSabcpp	'L-cysteine uptake via ABC system (periplasm)'	atp_c + h2o_c + cys__L_p <-> adp_c + cys__L_c + h_c + pi_c	RHEA: http://identifiers.org/rhea/29783#2; RHEA: http://identifiers.org/rhea/29784#2; RHEA: http://identifiers.org/rhea/29785#2; RHEA: http://identifiers.org/rhea/29786#2; EC Number: http://identifiers.org/ec-code/3.6.3.21; RHEA: http://identifiers.org/rhea/32795#1; RHEA: http://identifiers.org/rhea/32796#1; RHEA: http://identifiers.org/rhea/32797#1; RHEA: http://identifiers.org/rhea/32798#1; Bio…	0.375	0.5	0.333333	0.107143	0.166667	0.222222	0.157895	0.173913	0.125	0.326087	0.166667
R_CYTB_B2	'Menaquinol oxidase 71 protons'	2.0 h_c + mql7_c + 0.5 o2_c <-> h2o_c + mqn7_c + 2.0 h_e	MetaNetX (MNX) Equation: http://identifiers.org/metanetx.reaction/MNXR97037	0.375	0.4	0.333333	0.214286	0.25	0.288889	0.157895	0.23913	0.025	0.16087	0.0833333
R_CYTD	'Cytidine deaminase'	cytd_c + h_c + h2o_c <-> nh4_c + uri_c	RHEA: http://identifiers.org/rhea/16069; RHEA: http://identifiers.org/rhea/16070; RHEA: http://identifiers.org/rhea/16071; RHEA: http://identifiers.org/rhea/16072; EC Number: http://identifiers.org/ec-code/3.5.4.5; BioCyc: http://identifiers.org/biocyc/META:CYTIDEAM2-RXN; MetaNetX (MNX) Equation: http://identifiers.org/metanetx.reaction/MNXR97039; KEGG Reaction: http://identifiers.org/kegg.reacti…	1	1	1	1	1	1	1	1	0	0	0
R_CYTK1	'Cytidylate kinase (CMP)'	atp_c + cmp_c <-> adp_c + cdp_c	RHEA: http://identifiers.org/rhea/11600; RHEA: http://identifiers.org/rhea/11601; RHEA: http://identifiers.org/rhea/11602; RHEA: http://identifiers.org/rhea/11603; EC Number: http://identifiers.org/ec-code/2.7.4.14; EC Number: http://identifiers.org/ec-code/2.7.4.25; BioCyc: http://identifiers.org/biocyc/META:RXN-11832; MetaNetX (MNX) Equation: http://identifiers.org/metanetx.reaction/MNXR97047; …	1	1	1	1	1	1	1	1	0	0	0
R_CYTK2	'Cytidylate kinase (dCMP)'	atp_c + dcmp_c <-> adp_c + dcdp_c	EC Number: http://identifiers.org/ec-code/2.7.4.13; EC Number: http://identifiers.org/ec-code/2.7.4.14; EC Number: http://identifiers.org/ec-code/2.7.4.25; RHEA: http://identifiers.org/rhea/25094; RHEA: http://identifiers.org/rhea/25095; RHEA: http://identifiers.org/rhea/25096; RHEA: http://identifiers.org/rhea/25097; BioCyc: http://identifiers.org/biocyc/META:RXN-7913; MetaNetX (MNX) Equation: h…	1	1	1	1	1	1	1	1	0	0	0
R_CYTOM	'Cytosine 5 methyltransferase'	amet_c + csn_c <-> 5mcsn_c + ahcys_c + h_c	EC Number: http://identifiers.org/ec-code/2.1.1.37; MetaNetX (MNX) Equation: http://identifiers.org/metanetx.reaction/MNXR97062; SEED Reaction: http://identifiers.org/seed.reaction/rxn09888	1	1	1	1	1	1	1	1	0	0	0
R_DADK	'Deoxyadenylate kinase'	atp_c + damp_c <-> adp_c + dadp_c	EC Number: http://identifiers.org/ec-code/2.7.4.11; EC Number: http://identifiers.org/ec-code/2.7.4.13; EC Number: http://identifiers.org/ec-code/2.7.4.3; RHEA: http://identifiers.org/rhea/23100; RHEA: http://identifiers.org/rhea/23101; RHEA: http://identifiers.org/rhea/23102; RHEA: http://identifiers.org/rhea/23103; BioCyc: http://identifiers.org/biocyc/META:DEOXYADENYLATE-KINASE-RXN; MetaNetX (…	0.875	1	1	1	0.972222	1	1	1	0.125	0	0.0277778
R_DASYN120	'CDP-diacylglycerol synthetase (n-C12:0)'	ctp_c + h_c + pa120_c <-> cdpdddecg_c + ppi_c	EC Number: http://identifiers.org/ec-code/2.7.7.41; MetaNetX (MNX) Equation: http://identifiers.org/metanetx.reaction/MNXR97154; SEED Reaction: http://identifiers.org/seed.reaction/rxn08306	0.5	0.5	0.333333	0.142857	0.222222	0.155556	0.105263	0.141304	0	0.358696	0.111111
R_DASYN140	'CDP-diacylglycerol synthetase (n-C14:0)'	ctp_c + h_c + pa140_c <-> cdpdtdecg_c + ppi_c	EC Number: http://identifiers.org/ec-code/2.7.7.41; MetaNetX (MNX) Equation: http://identifiers.org/metanetx.reaction/MNXR97155; SEED Reaction: http://identifiers.org/seed.reaction/rxn08307	0.625	0.3	0.333333	0.142857	0.25	0.155556	0.157895	0.152174	-0.325	0.147826	0.0833333
R_DASYN160	'CDP-diacylglycerol synthetase (n-C16:0)'	ctp_c + h_c + pa160_c <-> cdpdhdecg_c + ppi_c	EC Number: http://identifiers.org/ec-code/2.7.7.41; MetaNetX (MNX) Equation: http://identifiers.org/metanetx.reaction/MNXR97157; SEED Reaction: http://identifiers.org/seed.reaction/rxn08309	1	1	1	1	1	1	1	1	0	0	0
R_DASYN161	'CDP-diacylglycerol synthetase (n-C16:1)'	ctp_c + h_c + pa161_c <-> cdpdhdec9eg_c + ppi_c	EC Number: http://identifiers.org/ec-code/2.7.7.41; MetaNetX (MNX) Equation: http://identifiers.org/metanetx.reaction/MNXR97159; SEED Reaction: http://identifiers.org/seed.reaction/rxn08310	1	1	1	1	1	1	1	1	0	0	0
R_DASYN180	'CDP-diacylglycerol synthetase (n-C18:0)'	ctp_c + h_c + pa180_c <-> cdpdodecg_c + ppi_c	EC Number: http://identifiers.org/ec-code/2.7.7.41; MetaNetX (MNX) Equation: http://identifiers.org/metanetx.reaction/MNXR97160; SEED Reaction: http://identifiers.org/seed.reaction/rxn08311	1	1	1	1	1	1	1	1	0	0	0
R_DASYN181	'CDP-diacylglycerol synthetase (n-C18:1)'	ctp_c + h_c + pa181_c <-> cdpdodec11eg_c + ppi_c	EC Number: http://identifiers.org/ec-code/2.7.7.41; MetaNetX (MNX) Equation: http://identifiers.org/metanetx.reaction/MNXR97161; SEED Reaction: http://identifiers.org/seed.reaction/rxn08312	0.5	0.5	0.5	0.0714286	0.166667	0.0888889	0.157895	0.0978261	0	0.402174	0.333333
R_DCMPDA	'DCMP deaminase'	dcmp_c + h_c + h2o_c <-> dump_c + nh4_c	RHEA: http://identifiers.org/rhea/22924; RHEA: http://identifiers.org/rhea/22925; RHEA: http://identifiers.org/rhea/22926; RHEA: http://identifiers.org/rhea/22927; EC Number: http://identifiers.org/ec-code/3.5.4.12; BioCyc: http://identifiers.org/biocyc/META:DCMP-DEAMINASE-RXN; MetaNetX (MNX) Equation: http://identifiers.org/metanetx.reaction/MNXR97185; Reactome Reaction: http://identifiers.org/r…	0.875	0.9	0.833333	1	0.972222	1	0.947368	0.98913	0.025	-0.0891304	-0.138889
R_DCYTD	'Deoxycytidine deaminase'	dcyt_c + h_c + h2o_c <-> duri_c + nh4_c	RHEA: http://identifiers.org/rhea/13433; RHEA: http://identifiers.org/rhea/13434; RHEA: http://identifiers.org/rhea/13435; RHEA: http://identifiers.org/rhea/13436; EC Number: http://identifiers.org/ec-code/3.5.4.5; BioCyc: http://identifiers.org/biocyc/META:CYTIDEAM-RXN; MetaNetX (MNX) Equation: http://identifiers.org/metanetx.reaction/MNXR97207; Reactome Reaction: http://identifiers.org/reactome…	0.875	1	1	0.928571	0.916667	0.911111	0.947368	0.923913	0.125	0.076087	0.0833333
R_DGK1	'Deoxyguanylate kinase (dGMP:ATP)'	atp_c + dgmp_c <-> adp_c + dgdp_c	RHEA: http://identifiers.org/rhea/12697; RHEA: http://identifiers.org/rhea/12698; RHEA: http://identifiers.org/rhea/12699; RHEA: http://identifiers.org/rhea/12700; EC Number: http://identifiers.org/ec-code/2.7.4.12; EC Number: http://identifiers.org/ec-code/2.7.4.13; EC Number: http://identifiers.org/ec-code/2.7.4.8; BioCyc: http://identifiers.org/biocyc/META:GMKALT-RXN; MetaNetX (MNX) Equation: …	1	1	1	1	1	1	1	1	0	0	0
R_DGNSK	'Deoxyguanosine kinase'	atp_c + dgsn_c <-> adp_c + dgmp_c + h_c	RHEA: http://identifiers.org/rhea/19201; RHEA: http://identifiers.org/rhea/19202; RHEA: http://identifiers.org/rhea/19203; RHEA: http://identifiers.org/rhea/19204; EC Number: http://identifiers.org/ec-code/2.7.1.113; EC Number: http://identifiers.org/ec-code/2.7.1.145; EC Number: http://identifiers.org/ec-code/2.7.1.74; BioCyc: http://identifiers.org/biocyc/META:DEOXYGUANOSINE-KINASE-RXN; MetaNet…	1	1	1	1	1	1	1	1	0	0	0
R_DHAPT	'Dihydroxyacetone phosphotransferase'	dha_c + pep_c <-> dhap_c + pyr_c	RHEA: http://identifiers.org/rhea/18381; RHEA: http://identifiers.org/rhea/18382; RHEA: http://identifiers.org/rhea/18383; RHEA: http://identifiers.org/rhea/18384; EC Number: http://identifiers.org/ec-code/2.7.1.121; BioCyc: http://identifiers.org/biocyc/META:2.7.1.121-RXN; MetaNetX (MNX) Equation: http://identifiers.org/metanetx.reaction/MNXR97364; KEGG Reaction: http://identifiers.org/kegg.reac…	1	1	1	1	1	1	1	1	0	0	0
R_DHFOR	'Dihydrofolate:NAD+ oxidoreductase'	fol_c + h_c + nadh_c <-> dhf_c + nad_c	EC Number: http://identifiers.org/ec-code/1.5.1.3; MetaNetX (MNX) Equation: http://identifiers.org/metanetx.reaction/MNXR97399; KEGG Reaction: http://identifiers.org/kegg.reaction/R02235; SEED Reaction: http://identifiers.org/seed.reaction/rxn01601	0.625	0.8	0.666667	0.785714	0.75	0.911111	0.684211	0.826087	0.175	-0.026087	-0.0833333
R_DHFR	'Dihydrofolate reductase'	dhf_c + h_c + nadph_c <-> nadp_c + thf_c	EC Number: http://identifiers.org/ec-code/1.5.1.3; RHEA: http://identifiers.org/rhea/15009; RHEA: http://identifiers.org/rhea/15010; RHEA: http://identifiers.org/rhea/15011; RHEA: http://identifiers.org/rhea/15012; MetaNetX (MNX) Equation: http://identifiers.org/metanetx.reaction/MNXR97401; Reactome Reaction: http://identifiers.org/reactome/R-BTA-197972; Reactome Reaction: http://identifiers.org/…	1	1	1	1	1	1	1	1	0	0	0
R_DHFR2i	'Dihydrofolate reductase (NAD+)'	dhf_c + h_c + nadh_c <-> nad_c + thf_c	EC Number: http://identifiers.org/ec-code/1.5.1.3; MetaNetX (MNX) Equation: http://identifiers.org/metanetx.reaction/MNXR97402; KEGG Reaction: http://identifiers.org/kegg.reaction/R00936	1	1	1	1	1	1	1	1	0	0	0
R_DHORTS	'Dihydroorotase'	dhor__S_c + h2o_c <-> cbasp_c + h_c	RHEA: http://identifiers.org/rhea/24296; RHEA: http://identifiers.org/rhea/24297; RHEA: http://identifiers.org/rhea/24298; RHEA: http://identifiers.org/rhea/24299; EC Number: http://identifiers.org/ec-code/3.5.2.3; BioCyc: http://identifiers.org/biocyc/META:DIHYDROOROT-RXN; MetaNetX (MNX) Equation: http://identifiers.org/metanetx.reaction/MNXR97428; Reactome Reaction: http://identifiers.org/react…	1	0.9	0.833333	1	1	1	1	1	-0.1	-0.1	-0.166667
R_DHQTi	'3-dehydroquinate dehydratase, irreversible'	3dhq_c <-> 3dhsk_c + h2o_c	RHEA: http://identifiers.org/rhea/21096; RHEA: http://identifiers.org/rhea/21097; RHEA: http://identifiers.org/rhea/21098; RHEA: http://identifiers.org/rhea/21099; EC Number: http://identifiers.org/ec-code/4.2.1.10; BioCyc: http://identifiers.org/biocyc/META:3-DEHYDROQUINATE-DEHYDRATASE-RXN; MetaNetX (MNX) Equation: http://identifiers.org/metanetx.reaction/MNXR97449; KEGG Reaction: http://identif…	1	1	1	1	1	1	1	1	0	0	0
R_DIPEPabc1	'Dipeptide transport via ABC system ala asp'	atp_c + h2o_c + ala_L_asp__L_e <-> adp_c + ala_L_asp__L_c + h_c + pi_c	RHEA: http://identifiers.org/rhea/37263#1; RHEA: http://identifiers.org/rhea/37264#1; RHEA: http://identifiers.org/rhea/37265#1; RHEA: http://identifiers.org/rhea/37266#1; MetaNetX (MNX) Equation: http://identifiers.org/metanetx.reaction/MNXR97467; SEED Reaction: http://identifiers.org/seed.reaction/rxn05533	1	1	1	1	1	1	1	1	0	0	0
R_DIPEPabc10	'Dipeptide transport via ABC system gly glu'	atp_c + h2o_c + gly_glu__L_e <-> adp_c + gly_glu__L_c + h_c + pi_c	MetaNetX (MNX) Equation: http://identifiers.org/metanetx.reaction/MNXR97468; SEED Reaction: http://identifiers.org/seed.reaction/rxn05534	1	1	1	1	1	1	1	1	0	0	0
R_DIPEPabc12	'Dipeptide transport via ABC system met ala'	atp_c + h2o_c + met_L_ala__L_e <-> adp_c + h_c + met_L_ala__L_c + pi_c	MetaNetX (MNX) Equation: http://identifiers.org/metanetx.reaction/MNXR97470; SEED Reaction: http://identifiers.org/seed.reaction/rxn05536	1	1	1	1	1	1	1	1	0	0	0
R_DIPEPabc13	'Dipeptide transport via ABC system gly asp'	atp_c + h2o_c + gly_asp__L_e <-> adp_c + gly_asp__L_c + h_c + pi_c	MetaNetX (MNX) Equation: http://identifiers.org/metanetx.reaction/MNXR142734; SEED Reaction: http://identifiers.org/seed.reaction/rxn05537	1	1	1	1	1	1	1	1	0	0	0
R_DIPEPabc14	'Dipeptide transport via ABC system gly pro L'	atp_c + h2o_c + gly_pro__L_e <-> adp_c + gly_pro__L_c + h_c + pi_c	MetaNetX (MNX) Equation: http://identifiers.org/metanetx.reaction/MNXR97472; SEED Reaction: http://identifiers.org/seed.reaction/rxn05538	1	1	1	1	1	1	1	1	0	0	0
R_DIPEPabc15	'Dipeptide transport via ABC system cgly'	atp_c + h2o_c + cgly_e <-> adp_c + cgly_c + h_c + pi_c	MetaNetX (MNX) Equation: http://identifiers.org/metanetx.reaction/MNXR96656; SEED Reaction: http://identifiers.org/seed.reaction/rxn05539; SEED Reaction: http://identifiers.org/seed.reaction/rxn08210	1	1	1	1	1	1	1	1	0	0	0
R_DIPEPabc3	'Dipeptide transport via ABC system ala glu'	atp_c + h2o_c + ala_L_glu__L_e <-> adp_c + ala_L_glu__L_c + h_c + pi_c	MetaNetX (MNX) Equation: http://identifiers.org/metanetx.reaction/MNXR97474; SEED Reaction: http://identifiers.org/seed.reaction/rxn05541	1	1	1	1	1	1	1	1	0	0	0
R_DIPEPabc8	'Dipeptide transport via ABC system gly asn'	atp_c + h2o_c + gly_asn__L_e <-> adp_c + gly_asn__L_c + h_c + pi_c	MetaNetX (MNX) Equation: http://identifiers.org/metanetx.reaction/MNXR97479; SEED Reaction: http://identifiers.org/seed.reaction/rxn05546	1	1	1	1	1	1	1	1	0	0	0
R_DRIBabc	'Deoxyribose transport via ABC system'	atp_c + h2o_c + drib_e <-> adp_c + drib_c + h_c + pi_c	MetaNetX (MNX) Equation: http://identifiers.org/metanetx.reaction/MNXR97782; SEED Reaction: http://identifiers.org/seed.reaction/rxn05549	1	1	1	1	1	1	1	1	0	0	0
R_DRPA	'Deoxyribose-phosphate aldolase'	2dr5p_c <-> acald_c + g3p_c	RHEA: http://identifiers.org/rhea/12821; RHEA: http://identifiers.org/rhea/12822; RHEA: http://identifiers.org/rhea/12823; RHEA: http://identifiers.org/rhea/12824; EC Number: http://identifiers.org/ec-code/4.1.2.4; BioCyc: http://identifiers.org/biocyc/META:DEOXYRIBOSE-P-ALD-RXN; MetaNetX (MNX) Equation: http://identifiers.org/metanetx.reaction/MNXR97787; Reactome Reaction: http://identifiers.org…	1	1	1	1	1	1	1	1	0	0	0
R_DTMPK	'DTMP kinase'	atp_c + dtmp_c <-> adp_c + dtdp_c	RHEA: http://identifiers.org/rhea/13517; RHEA: http://identifiers.org/rhea/13518; RHEA: http://identifiers.org/rhea/13519; RHEA: http://identifiers.org/rhea/13520; EC Number: http://identifiers.org/ec-code/2.7.4.12; EC Number: http://identifiers.org/ec-code/2.7.4.13; EC Number: http://identifiers.org/ec-code/2.7.4.9; BioCyc: http://identifiers.org/biocyc/META:DTMPKI-RXN; MetaNetX (MNX) Equation: …	1	1	1	1	1	1	1	1	0	0	0
R_DURIK1	'Deoxyuridine kinase (ATP:Deoxyuridine)'	atp_c + duri_c <-> adp_c + dump_c + h_c	EC Number: http://identifiers.org/ec-code/2.7.1.145; EC Number: http://identifiers.org/ec-code/2.7.1.21; RHEA: http://identifiers.org/rhea/28206; RHEA: http://identifiers.org/rhea/28207; RHEA: http://identifiers.org/rhea/28208; RHEA: http://identifiers.org/rhea/28209; BioCyc: http://identifiers.org/biocyc/META:DURIDKI-RXN; MetaNetX (MNX) Equation: http://identifiers.org/metanetx.reaction/MNXR9781…	1	1	1	1	1	1	1	1	0	0	0
R_DURIK1_1	'Deoxyuridine kinase (ATP:Deoxyuridine)'	atp_c + duri_c <-> adp_c + dump_c		1	1	1	1	1	1	1	1	0	0	0
R_DURIPP	'Deoxyuridine phosphorylase'	duri_c + pi_c <-> 2dr1p_c + ura_c	EC Number: http://identifiers.org/ec-code/2.4.2.1; EC Number: http://identifiers.org/ec-code/2.4.2.2; EC Number: http://identifiers.org/ec-code/2.4.2.3; EC Number: http://identifiers.org/ec-code/2.4.2.4; RHEA: http://identifiers.org/rhea/22824; RHEA: http://identifiers.org/rhea/22825; RHEA: http://identifiers.org/rhea/22826; RHEA: http://identifiers.org/rhea/22827; BioCyc: http://identifiers.org/…	1	1	1	1	1	1	1	1	0	0	0
R_DURIPP_1	'Deoxyuridine phosphorylase'	duri_c + h_c + pi_c <-> 2dr1p_c + ura_c		1	1	1	1	1	1	1	1	0	0	0
R_ENO	'Enolase'	2pg_c <-> h2o_c + pep_c	RHEA: http://identifiers.org/rhea/10164; RHEA: http://identifiers.org/rhea/10165; RHEA: http://identifiers.org/rhea/10166; RHEA: http://identifiers.org/rhea/10167; EC Number: http://identifiers.org/ec-code/4.2.1.11; BioCyc: http://identifiers.org/biocyc/META:2PGADEHYDRAT-RXN; MetaNetX (MNX) Equation: http://identifiers.org/metanetx.reaction/MNXR97932; Reactome Reaction: http://identifiers.org/rea…	1	1	1	1	1	1	1	1	0	0	0
R_F1PP	'D-fructose 1-phosphate phosphatase'	f1p_c + h2o_c <-> pi_c + fru_c		1	1	1	1	1	1	0.947368	0.98913	0	0.0108696	0
R_F6PP	'D-fructose 6-phosphate phosphatase'	f6p_c + h2o_c <-> fru_c + pi_c	MetaNetX (MNX) Equation: http://identifiers.org/metanetx.reaction/MNXR99077	1	1	1	1	1	1	0.947368	0.98913	0	0.0108696	0
R_FBA	'Fructose-bisphosphate aldolase'	fdp_c <-> dhap_c + g3p_c	RHEA: http://identifiers.org/rhea/14729; RHEA: http://identifiers.org/rhea/14730; RHEA: http://identifiers.org/rhea/14731; RHEA: http://identifiers.org/rhea/14732; EC Number: http://identifiers.org/ec-code/4.1.2.13; MetaNetX (MNX) Equation: http://identifiers.org/metanetx.reaction/MNXR99459; KEGG Reaction: http://identifiers.org/kegg.reaction/R01068; SEED Reaction: http://identifiers.org/seed.rea…	1	1	1	1	1	1	1	1	0	0	0
R_FBA2	'D Fructose 1 phosphate D glyceraldehyde 3 phosphate lyase'	f1p_c <-> dhap_c + glyald_c	RHEA: http://identifiers.org/rhea/30851; RHEA: http://identifiers.org/rhea/30852; RHEA: http://identifiers.org/rhea/30853; RHEA: http://identifiers.org/rhea/30854; EC Number: http://identifiers.org/ec-code/4.1.2.13; MetaNetX (MNX) Equation: http://identifiers.org/metanetx.reaction/MNXR99460; KEGG Reaction: http://identifiers.org/kegg.reaction/R02568; SEED Reaction: http://identifiers.org/seed.rea…	1	1	1	1	1	1	1	1	0	0	0
R_FBA3	'Sedoheptulose 1,7-bisphosphate D-glyceraldehyde-3-phosphate-lyase'	s17bp_c <-> dhap_c + e4p_c	RHEA: http://identifiers.org/rhea/30167; RHEA: http://identifiers.org/rhea/30168; RHEA: http://identifiers.org/rhea/30169; RHEA: http://identifiers.org/rhea/30170; EC Number: http://identifiers.org/ec-code/4.1.2; EC Number: http://identifiers.org/ec-code/4.1.2.13; BioCyc: http://identifiers.org/biocyc/META:SEDOBISALDOL-RXN; MetaNetX (MNX) Equation: http://identifiers.org/metanetx.reaction/MNXR994…	1	1	1	1	1	1	1	1	0	0	0
R_FBP	'Fructose-bisphosphatase'	fdp_c + h2o_c <-> f6p_c + pi_c	RHEA: http://identifiers.org/rhea/11064; RHEA: http://identifiers.org/rhea/11065; RHEA: http://identifiers.org/rhea/11066; RHEA: http://identifiers.org/rhea/11067; EC Number: http://identifiers.org/ec-code/3.1.3.11; MetaNetX (MNX) Equation: http://identifiers.org/metanetx.reaction/MNXR99465	1	1	1	1	1	1	1	1	0	0	0
R_FE2Gabcpp	'Iron (II) transport via ABC system (GTP) (periplasm)'	gtp_c + h2o_c + fe2_p <-> fe2_c + gdp_c + h_c + pi_c	MetaNetX (MNX) Equation: http://identifiers.org/metanetx.reaction/MNXR99502	0.875	1	1	1	0.972222	1	1	1	0.125	0	0.0277778
R_FE2abc	'Iron (II) transport via ABC system'	atp_c + fe2_e + h2o_c <-> adp_c + fe2_c + h_c + pi_c	MetaNetX (MNX) Equation: http://identifiers.org/metanetx.reaction/MNXR99504; SEED Reaction: http://identifiers.org/seed.reaction/rxn05555; SEED Reaction: http://identifiers.org/seed.reaction/rxn08472	1	1	1	1	1	1	1	1	0	0	0
R_FE2abcpp	'Iron (II) transport via ABC system (periplasm)'	atp_c + h2o_c + fe2_p <-> adp_c + fe2_c + h_c + pi_c	MetaNetX (MNX) Equation: http://identifiers.org/metanetx.reaction/MNXR99504; SEED Reaction: http://identifiers.org/seed.reaction/rxn05555; SEED Reaction: http://identifiers.org/seed.reaction/rxn08472	0.875	1	1	1	0.972222	1	1	1	0.125	0	0.0277778
R_FE2tex	'Iron (II) transport via diffusion (extracellular to periplasm)'	fe2_e <-> fe2_p	RHEA: http://identifiers.org/rhea/28486; RHEA: http://identifiers.org/rhea/28487; RHEA: http://identifiers.org/rhea/28488; RHEA: http://identifiers.org/rhea/28489; BioCyc: http://identifiers.org/biocyc/META:TRANS-RXN-8; MetaNetX (MNX) Equation: http://identifiers.org/metanetx.reaction/MNXR99505; SEED Reaction: http://identifiers.org/seed.reaction/rxn08475; SEED Reaction: http://identifiers.org/se…	0.875	1	1	1	0.972222	1	1	1	0.125	0	0.0277778
R_FE3Gabcpp	'Iron (III) transport via ABC system (GTP) (periplasm)'	gtp_c + h2o_c + fe3_p <-> fe3_c + gdp_c + h_c + pi_c	MetaNetX (MNX) Equation: http://identifiers.org/metanetx.reaction/MNXR99513	1	1	1	1	1	1	1	1	0	0	0
R_FE3PYOVDL2	'Ferripyoverdine complex formation P putida KT2440 specific'	fe3_e + pyovd_kt_e <-> fe3pyovd_kt_e		1	1	1	1	1	1	1	1	0	0	0
R_FE3abc	'Iron (III) transport via ABC system'	atp_c + fe3_e + h2o_c <-> adp_c + fe3_c + h_c + pi_c	RHEA: http://identifiers.org/rhea/12332#1; RHEA: http://identifiers.org/rhea/12333#1; RHEA: http://identifiers.org/rhea/12334#1; RHEA: http://identifiers.org/rhea/12335#1; EC Number: http://identifiers.org/ec-code/3.6.3.30; BioCyc: http://identifiers.org/biocyc/META:3.6.3.30-RXN; MetaNetX (MNX) Equation: http://identifiers.org/metanetx.reaction/MNXR99525; SEED Reaction: http://identifiers.org/see…	0.875	1	1	0.821429	0.833333	0.777778	0.842105	0.804348	0.125	0.195652	0.166667
R_FEDCabc	'Iron III dicitrate transport via ABC system'	h2o_c + 2.0 cit_e + fe3_e + atp_c <-> adp_c + pi_c + 2.0 cit_c + fe3_c + h_c	MetaNetX (MNX) Equation: http://identifiers.org/metanetx.reaction/MNXR99538; SEED Reaction: http://identifiers.org/seed.reaction/rxn05557	0.25	0.9	0.833333	0	0.0555556	0	0	0	0.65	0.9	0.777778
R_FEROc	'Ferroxidase'	4.0 fe2_c + 4.0 h_c + o2_c <-> 4.0 fe3_c + 2.0 h2o_c	EC Number: http://identifiers.org/ec-code/1.16.3.1; RHEA: http://identifiers.org/rhea/11148; RHEA: http://identifiers.org/rhea/11149; RHEA: http://identifiers.org/rhea/11150; RHEA: http://identifiers.org/rhea/11151; RHEA: http://identifiers.org/rhea/11436; RHEA: http://identifiers.org/rhea/11437; RHEA: http://identifiers.org/rhea/11438; RHEA: http://identifiers.org/rhea/11439; BioCyc: http://iden…	1	1	1	1	1	1	1	1	0	0	0
R_FMNAT	'FMN adenylyltransferase'	atp_c + fmn_c + h_c <-> fad_c + ppi_c	RHEA: http://identifiers.org/rhea/17237; RHEA: http://identifiers.org/rhea/17238; RHEA: http://identifiers.org/rhea/17239; RHEA: http://identifiers.org/rhea/17240; EC Number: http://identifiers.org/ec-code/2.7.7.2; BioCyc: http://identifiers.org/biocyc/META:FADSYN-RXN; MetaNetX (MNX) Equation: http://identifiers.org/metanetx.reaction/MNXR95501; Reactome Reaction: http://identifiers.org/reactome/R…	1	1	1	1	1	1	1	1	0	0	0
R_FMNAT_1	'FMN adenylyltransferase'	atp_c + fmn_c <-> fad_c + ppi_c		1	0.9	1	1	1	0.977778	0.947368	0.978261	-0.1	-0.0782609	0
R_FOLR2	'Folate reductase'	nadph_c + fol_c <-> nadp_c + dhf_c	EC Number: http://identifiers.org/ec-code/1.5.1.3; RHEA: http://identifiers.org/rhea/31103; RHEA: http://identifiers.org/rhea/31104; RHEA: http://identifiers.org/rhea/31105; RHEA: http://identifiers.org/rhea/31106; MetaNetX (MNX) Equation: http://identifiers.org/metanetx.reaction/MNXR97400; Reactome Reaction: http://identifiers.org/reactome/R-BTA-197963; Reactome Reaction: http://identifiers.org/…	0.875	1	1	0.821429	0.833333	0.955556	0.894737	0.902174	0.125	0.0978261	0.166667
R_FRD2	'Fumarate reductase'	fum_c + mql8_c <-> mqn8_c + succ_c	RHEA: http://identifiers.org/rhea/29215; RHEA: http://identifiers.org/rhea/29216; RHEA: http://identifiers.org/rhea/29217; RHEA: http://identifiers.org/rhea/29218; MetaNetX (MNX) Equation: http://identifiers.org/metanetx.reaction/MNXR99637; SEED Reaction: http://identifiers.org/seed.reaction/rxn08527	0.125	0.2	0.166667	0	0.0277778	0	0	0	0.075	0.2	0.138889
R_FRD3	'Fumarate reductase'	2dmmql8_c + fum_c <-> 2dmmq8_c + succ_c	EC Number: http://identifiers.org/ec-code/1.3.99.1; MetaNetX (MNX) Equation: http://identifiers.org/metanetx.reaction/MNXR99639; SEED Reaction: http://identifiers.org/seed.reaction/rxn08528	0.125	0.2	0.166667	0	0.0277778	0	0	0	0.075	0.2	0.138889
R_FRUK	'Fructose-1-phosphate kinase'	atp_c + f1p_c <-> adp_c + fdp_c + h_c	RHEA: http://identifiers.org/rhea/14213; RHEA: http://identifiers.org/rhea/14214; RHEA: http://identifiers.org/rhea/14215; RHEA: http://identifiers.org/rhea/14216; EC Number: http://identifiers.org/ec-code/2.7.1.56; MetaNetX (MNX) Equation: http://identifiers.org/metanetx.reaction/MNXR99652; SEED Reaction: http://identifiers.org/seed.reaction/rxn01492	1	1	1	1	1	1	1	1	0	0	0
R_FRUpts	'D-fructose transport via PEP:Pyr PTS'	fru_e + pep_c <-> f1p_c + pyr_c	MetaNetX (MNX) Equation: http://identifiers.org/metanetx.reaction/MNXR99661; SEED Reaction: http://identifiers.org/seed.reaction/rxn05560; SEED Reaction: http://identifiers.org/seed.reaction/rxn08536	1	1	1	1	1	1	1	1	0	0	0
R_G1PP	'Glucose-1-phosphatase'	g1p_c + h2o_c <-> glc__D_c + pi_c	RHEA: http://identifiers.org/rhea/19933; RHEA: http://identifiers.org/rhea/19934; RHEA: http://identifiers.org/rhea/19935; RHEA: http://identifiers.org/rhea/19936; EC Number: http://identifiers.org/ec-code/3.1.3.10; BioCyc: http://identifiers.org/biocyc/META:GLUCOSE-1-PHOSPHAT-RXN; BioCyc: http://identifiers.org/biocyc/META:RXN-17330; MetaNetX (MNX) Equation: http://identifiers.org/metanetx.react…	1	1	1	1	1	1	1	1	0	0	0
R_G3PAT160	'Glycerol-3-phosphate acyltransferase (C16:0)'	glyc3p_c + palmACP_c <-> 1hdecg3p_c + ACP_c	EC Number: http://identifiers.org/ec-code/2.3.1.15; MetaNetX (MNX) Equation: http://identifiers.org/metanetx.reaction/MNXR99857	1	1	1	1	1	1	1	1	0	0	0
R_G3PAT161	'Glycerol-3-phosphate acyltransferase (C16:1)'	glyc3p_c + hdeACP_c <-> 1hdec9eg3p_c + ACP_c	EC Number: http://identifiers.org/ec-code/2.3.1.15; MetaNetX (MNX) Equation: http://identifiers.org/metanetx.reaction/MNXR99859	1	1	1	1	1	1	1	1	0	0	0
R_G3PAT180	'Glycerol-3-phosphate acyltransferase (C18:0)'	glyc3p_c + ocdcaACP_c <-> 1odecg3p_c + ACP_c	EC Number: http://identifiers.org/ec-code/2.3.1.15; MetaNetX (MNX) Equation: http://identifiers.org/metanetx.reaction/MNXR99860	1	1	1	1	1	1	1	1	0	0	0
R_G3PCabcpp	'Sn-glycerol-3-phosphocholine transport via ABC system (periplasm)'	atp_c + h2o_c + g3pc_p <-> adp_c + g3pc_c + h_c + pi_c	MetaNetX (MNX) Equation: http://identifiers.org/metanetx.reaction/MNXR99873; SEED Reaction: http://identifiers.org/seed.reaction/rxn08553	0.5	0.5	0.666667	0.0357143	0.138889	0.133333	0.210526	0.119565	0	0.380435	0.527778
R_G3PD1ir	'Glycerol 3 phosphate dehydrogenase NAD'	dhap_c + h_c + nadh_c <-> glyc3p_c + nad_c	EC Number: http://identifiers.org/ec-code/1.1.1.8; EC Number: http://identifiers.org/ec-code/1.1.1.94; RHEA: http://identifiers.org/rhea/11092; RHEA: http://identifiers.org/rhea/11093; RHEA: http://identifiers.org/rhea/11094; RHEA: http://identifiers.org/rhea/11095; BioCyc: http://identifiers.org/biocyc/META:1.1.1.8-RXN; MetaNetX (MNX) Equation: http://identifiers.org/metanetx.reaction/MNXR99876;…	1	1	1	1	1	1	1	1	0	0	0
R_G3PD2	'Glycerol-3-phosphate dehydrogenase (NADP)'	glyc3p_c + nadp_c <-> dhap_c + h_c + nadph_c	EC Number: http://identifiers.org/ec-code/1.1.1.94; RHEA: http://identifiers.org/rhea/11096; RHEA: http://identifiers.org/rhea/11097; RHEA: http://identifiers.org/rhea/11098; RHEA: http://identifiers.org/rhea/11099; MetaNetX (MNX) Equation: http://identifiers.org/metanetx.reaction/MNXR99877; KEGG Reaction: http://identifiers.org/kegg.reaction/R00844; SEED Reaction: http://identifiers.org/seed.rea…	1	1	1	1	1	1	1	1	0	0	0
R_G3PEabcpp	'Sn-glycerol-3-phosphoethanolamine transport via ABC system (periplasm)'	atp_c + h2o_c + g3pe_p <-> adp_c + g3pe_c + h_c + pi_c	MetaNetX (MNX) Equation: http://identifiers.org/metanetx.reaction/MNXR99883; SEED Reaction: http://identifiers.org/seed.reaction/rxn08559	1	0.8	1	0.964286	0.972222	0.911111	1	0.945652	-0.2	-0.145652	0.0277778
R_G3PGabcpp	'Sn-glycerol-3-phosphoglycerol transport via ABC system (periplasm)'	atp_c + h2o_c + g3pg_p <-> adp_c + g3pg_c + h_c + pi_c	MetaNetX (MNX) Equation: http://identifiers.org/metanetx.reaction/MNXR99885; SEED Reaction: http://identifiers.org/seed.reaction/rxn08561	1	0.8	1	1	1	1	1	1	-0.2	-0.2	0
R_G3PIabcpp	'Sn-glycerol-3-phosphoethanolamine transport via ABC system (periplasm)'	atp_c + h2o_c + g3pi_p <-> adp_c + g3pi_c + h_c + pi_c	MetaNetX (MNX) Equation: http://identifiers.org/metanetx.reaction/MNXR99887; SEED Reaction: http://identifiers.org/seed.reaction/rxn08563	1	0.8	1	0.928571	0.944444	1	0.947368	0.967391	-0.2	-0.167391	0.0555556
R_G3PSabcpp	'Sn-glycerol-3-phosphoserine transport via ABC system (periplasm)'	atp_c + h2o_c + g3ps_p <-> adp_c + g3ps_c + h_c + pi_c	MetaNetX (MNX) Equation: http://identifiers.org/metanetx.reaction/MNXR99892; SEED Reaction: http://identifiers.org/seed.reaction/rxn08565	1	0.7	1	0.928571	0.944444	1	0.947368	0.967391	-0.3	-0.267391	0.0555556
R_G3PT	'Glycerol-3-phosphatase'	glyc3p_c + h2o_c <-> glyc_c + pi_c	EC Number: http://identifiers.org/ec-code/3.1.3.2; EC Number: http://identifiers.org/ec-code/3.1.3.21; BioCyc: http://identifiers.org/biocyc/META:RXN-14965; MetaNetX (MNX) Equation: http://identifiers.org/metanetx.reaction/MNXR99894; KEGG Reaction: http://identifiers.org/kegg.reaction/R00841; SEED Reaction: http://identifiers.org/seed.reaction/rxn00610	1	1	1	1	1	1	1	1	0	0	0
R_G6PDA	'Glucosamine-6-phosphate deaminase'	gam6p_c + h2o_c <-> f6p_c + nh4_c	EC Number: http://identifiers.org/ec-code/3.5.99.6; MetaNetX (MNX) Equation: http://identifiers.org/metanetx.reaction/MNXR99905; KEGG Reaction: http://identifiers.org/kegg.reaction/R00765; SEED Reaction: http://identifiers.org/seed.reaction/rxn00552	1	1	1	1	1	1	1	1	0	0	0
R_G6PI	'Glucose 6 phosphate isomerase'	g6p_c <-> g6p_B_c	EC Number: http://identifiers.org/ec-code/5.1.3.15; EC Number: http://identifiers.org/ec-code/5.3.1.9; MetaNetX (MNX) Equation: http://identifiers.org/metanetx.reaction/MNXR99909; SEED Reaction: http://identifiers.org/seed.reaction/rxn01977	1	1	1	1	1	1	1	1	0	0	0
R_G6PI3	'Glucose 6 phosphate isomerase'	g6p_B_c <-> f6p_c	EC Number: http://identifiers.org/ec-code/5.3.1.9; MetaNetX (MNX) Equation: http://identifiers.org/metanetx.reaction/MNXR99910; KEGG Reaction: http://identifiers.org/kegg.reaction/R03321	1	1	1	1	1	1	1	1	0	0	0
R_G6PP	'Glucose-6-phosphate phosphatase'	g6p_c + h2o_c <-> glc__D_c + pi_c	RHEA: http://identifiers.org/rhea/16689; RHEA: http://identifiers.org/rhea/16690; RHEA: http://identifiers.org/rhea/16691; RHEA: http://identifiers.org/rhea/16692; EC Number: http://identifiers.org/ec-code/3.1.3.58; EC Number: http://identifiers.org/ec-code/3.1.3.9; BioCyc: http://identifiers.org/biocyc/META:RXN66-526; MetaNetX (MNX) Equation: http://identifiers.org/metanetx.reaction/MNXR99912; K…	1	1	1	1	1	1	1	1	0	0	0
R_GALTpts	'Galactitol transport via PEP:Pyr PTS'	galt_e + pep_c <-> galt1p_c + pyr_c	MetaNetX (MNX) Equation: http://identifiers.org/metanetx.reaction/MNXR100018; SEED Reaction: http://identifiers.org/seed.reaction/rxn05567; SEED Reaction: http://identifiers.org/seed.reaction/rxn08586	1	1	1	1	1	1	1	1	0	0	0
R_GALabcpp	'D-galactose transport via ABC system (periplasm)'	atp_c + h2o_c + gal_p <-> adp_c + gal_c + h_c + pi_c	EC Number: http://identifiers.org/ec-code/3.6.3.17; BioCyc: http://identifiers.org/biocyc/META:ABC-18-RXN; MetaNetX (MNX) Equation: http://identifiers.org/metanetx.reaction/MNXR100023; SEED Reaction: http://identifiers.org/seed.reaction/rxn05162; SEED Reaction: http://identifiers.org/seed.reaction/rxn08573	1	1	1	1	1	1	1	1	0	0	0
R_GALpts	'Galactose transport via PTS'	gal_e + pep_c <-> dgal6p_c + pyr_c		1	1	1	1	1	1	1	1	0	0	0
R_GAMpts	'D-glucosamine transport via PEP:Pyr PTS'	gam_e + pep_c <-> gam6p_c + pyr_c	MetaNetX (MNX) Equation: http://identifiers.org/metanetx.reaction/MNXR100034; SEED Reaction: http://identifiers.org/seed.reaction/rxn05569; SEED Reaction: http://identifiers.org/seed.reaction/rxn08592	1	1	1	1	1	1	1	1	0	0	0
R_GAPD	'Glyceraldehyde-3-phosphate dehydrogenase'	g3p_c + nad_c + pi_c <-> 13dpg_c + h_c + nadh_c	EC Number: http://identifiers.org/ec-code/1.2.1.12; EC Number: http://identifiers.org/ec-code/1.2.1.59; RHEA: http://identifiers.org/rhea/10300; RHEA: http://identifiers.org/rhea/10301; RHEA: http://identifiers.org/rhea/10302; RHEA: http://identifiers.org/rhea/10303; BioCyc: http://identifiers.org/biocyc/META:GAPOXNPHOSPHN-RXN; MetaNetX (MNX) Equation: http://identifiers.org/metanetx.reaction/MNX…	1	1	1	1	1	1	1	1	0	0	0
R_GAPD_1	'Glyceraldehyde-3-phosphate dehydrogenase'	g3p_c + nad_c + pi_c <-> 13dpg_c + nadh_c		1	1	1	1	1	1	1	1	0	0	0
R_GAPDi_nadp	'Glyceraldehyde-3-phosphate dehydrogenase (NAD(P)+) (phosphorylating)'	h_c + nadph_c + 13dpg_c <-> nadp_c + pi_c + g3p_c	EC Number: http://identifiers.org/ec-code/1.2.1.13; EC Number: http://identifiers.org/ec-code/1.2.1.59; RHEA: http://identifiers.org/rhea/10296; RHEA: http://identifiers.org/rhea/10297; RHEA: http://identifiers.org/rhea/10298; RHEA: http://identifiers.org/rhea/10299; BioCyc: http://identifiers.org/biocyc/META:1.2.1.13-RXN; MetaNetX (MNX) Equation: http://identifiers.org/metanetx.reaction/MNXR1000…	1	1	1	1	1	1	1	1	0	0	0
R_GCCc	'Glycine-cleavage complex'	dhlpro_c + nad_c <-> h_c + lpro_c + nadh_c	EC Number: http://identifiers.org/ec-code/1.8.1.4; MetaNetX (MNX) Equation: http://identifiers.org/metanetx.reaction/MNXR100069; KEGG Reaction: http://identifiers.org/kegg.reaction/R03815; SEED Reaction: http://identifiers.org/seed.reaction/rxn06493	1	1	1	1	1	1	1	1	0	0	0
R_GCVHADPr	'GcvH-L complex ADP ribosylation'	gcvHL_nhLA_c + nad_c <-> gcvHL_ADPr_c + ncam_c		1	1	1	1	1	0.933333	0.947368	0.956522	0	0.0434783	0
R_GHMT2r	'Glycine hydroxymethyltransferase, reversible'	ser__L_c + thf_c <-> gly_c + h2o_c + mlthf_c	RHEA: http://identifiers.org/rhea/15481; RHEA: http://identifiers.org/rhea/15482; RHEA: http://identifiers.org/rhea/15483; RHEA: http://identifiers.org/rhea/15484; EC Number: http://identifiers.org/ec-code/2.1.2.1; MetaNetX (MNX) Equation: http://identifiers.org/metanetx.reaction/MNXR100142; KEGG Reaction: http://identifiers.org/kegg.reaction/R00945	1	1	1	1	1	1	1	1	0	0	0
R_GK1	'Guanylate kinase (GMP:ATP)'	atp_c + gmp_c <-> adp_c + gdp_c	EC Number: http://identifiers.org/ec-code/2.7.4.8; RHEA: http://identifiers.org/rhea/20780; RHEA: http://identifiers.org/rhea/20781; RHEA: http://identifiers.org/rhea/20782; RHEA: http://identifiers.org/rhea/20783; BioCyc: http://identifiers.org/biocyc/META:GUANYL-KIN-RXN; MetaNetX (MNX) Equation: http://identifiers.org/metanetx.reaction/MNXR100144; KEGG Reaction: http://identifiers.org/kegg.reac…	1	1	1	1	1	1	1	1	0	0	0
R_GK2	'Guanylate kinase GMPdATP'	datp_c + gmp_c <-> dadp_c + gdp_c	EC Number: http://identifiers.org/ec-code/2.7.4.8; MetaNetX (MNX) Equation: http://identifiers.org/metanetx.reaction/MNXR100145; SEED Reaction: http://identifiers.org/seed.reaction/rxn09562	1	1	1	1	1	1	1	1	0	0	0
R_GLCADpts	''	glc__aD_e + pep_c <-> g6p_A_c + pyr_c		1	0.9	0.833333	0.964286	0.972222	1	1	0.98913	-0.1	-0.0891304	-0.138889
R_GLCabc	'D-glucose transport via ABC system'	glc__D_e + atp_c + h2o_c <-> adp_c + h_c + glc__D_c + pi_c	EC Number: http://identifiers.org/ec-code/3.6.3.17; BioCyc: http://identifiers.org/biocyc/META:TRANS-RXN-320; MetaNetX (MNX) Equation: http://identifiers.org/metanetx.reaction/MNXR100236; SEED Reaction: http://identifiers.org/seed.reaction/rxn05147; SEED Reaction: http://identifiers.org/seed.reaction/rxn08606	1	1	1	1	1	1	1	1	0	0	0
R_GLCabcpp	'D-glucose transport via ABC system (periplasm)'	atp_c + h2o_c + glc__D_p <-> adp_c + glc__D_c + h_c + pi_c	EC Number: http://identifiers.org/ec-code/3.6.3.17; BioCyc: http://identifiers.org/biocyc/META:TRANS-RXN-320; MetaNetX (MNX) Equation: http://identifiers.org/metanetx.reaction/MNXR100236; SEED Reaction: http://identifiers.org/seed.reaction/rxn05147; SEED Reaction: http://identifiers.org/seed.reaction/rxn08606	1	1	1	1	1	1	1	1	0	0	0
R_GLCpts	'D-glucose transport via PEP:Pyr PTS'	glc__D_e + pep_c <-> g6p_c + pyr_c	MetaNetX (MNX) Equation: http://identifiers.org/metanetx.reaction/MNXR100237; SEED Reaction: http://identifiers.org/seed.reaction/rxn05226; SEED Reaction: http://identifiers.org/seed.reaction/rxn08612	1	1	1	1	1	1	1	1	0	0	0
R_GLNabc	'L-glutamine transport via ABC system'	h2o_c + atp_c + gln__L_e <-> gln__L_c + h_c + adp_c + pi_c	RHEA: http://identifiers.org/rhea/29895#1; RHEA: http://identifiers.org/rhea/29896#1; RHEA: http://identifiers.org/rhea/29897#1; RHEA: http://identifiers.org/rhea/29898#1; EC Number: http://identifiers.org/ec-code/3.6.3.21; BioCyc: http://identifiers.org/biocyc/META:ABC-12-RXN; MetaNetX (MNX) Equation: http://identifiers.org/metanetx.reaction/MNXR100258; SEED Reaction: http://identifiers.org/seed…	1	1	1	1	1	1	1	1	0	0	0
R_GLUKA_1	'Glucokinase/hexokinase (glc-A)'	glc__aD_c + atp_c <-> adp_c + g6p_A_c + h_c		0.875	1	1	0.678571	0.722222	0.844444	0.736842	0.771739	0.125	0.228261	0.277778
R_GLUabc	'L-glutamate transport via ABC system'	atp_c + glu__L_e + h2o_c <-> adp_c + glu__L_c + h_c + pi_c	RHEA: http://identifiers.org/rhea/29035#1; RHEA: http://identifiers.org/rhea/29036#1; RHEA: http://identifiers.org/rhea/29037#1; RHEA: http://identifiers.org/rhea/29038#1; EC Number: http://identifiers.org/ec-code/3.6.3.21; BioCyc: http://identifiers.org/biocyc/META:ABC-13-RXN; MetaNetX (MNX) Equation: http://identifiers.org/metanetx.reaction/MNXR100299; SEED Reaction: http://identifiers.org/seed…	1	1	1	1	1	1	1	1	0	0	0
R_GLYC3Pabcpp	'Sn-Glycerol 3-phosphate transport via ABC system (periplasm)'	atp_c + h2o_c + glyc3p_p <-> adp_c + glyc3p_c + h_c + pi_c	RHEA: http://identifiers.org/rhea/21668#1; RHEA: http://identifiers.org/rhea/21669#1; RHEA: http://identifiers.org/rhea/21670#1; RHEA: http://identifiers.org/rhea/21671#1; EC Number: http://identifiers.org/ec-code/3.6.3.20; BioCyc: http://identifiers.org/biocyc/META:3.6.3.20-RXN; BioCyc: http://identifiers.org/biocyc/META:ABC-34-RXN; MetaNetX (MNX) Equation: http://identifiers.org/metanetx.reacti…	1	0.8	1	1	1	1	1	1	-0.2	-0.2	0
R_GLYCYSAP	'Gly-Cys aminopeptidase'	gly_cys_c + h2o_c <-> cys__L_c + gly_c		1	1	1	1	1	1	1	1	0	0	0
R_GLYCtpp	'Glycerol transport via channel (periplasm)'	glyc_c <-> glyc_p	RHEA: http://identifiers.org/rhea/29675; RHEA: http://identifiers.org/rhea/29676; RHEA: http://identifiers.org/rhea/29677; RHEA: http://identifiers.org/rhea/29678; BioCyc: http://identifiers.org/biocyc/META:TRANS-RXN-131; MetaNetX (MNX) Equation: http://identifiers.org/metanetx.reaction/MNXR100343; Reactome Reaction: http://identifiers.org/reactome/R-BTA-432049; Reactome Reaction: http://identifi…	0.875	0.8	0.666667	0.535714	0.611111	0.622222	0.473684	0.565217	-0.075	0.234783	0.0555556
R_GLYGLYCNc	'Hydrolysis of glycylycine for uptake'	glygly_c + h2o_c <-> 2.0 gly_c	MetaNetX (MNX) Equation: http://identifiers.org/metanetx.reaction/MNXR100345	1	1	1	1	1	1	1	1	0	0	0
R_GLYLEUAP	'Gly-Leu aminopeptidase'	gly_leu_c + h2o_c <-> gly_c + leu__L_c		1	1	1	1	1	1	1	1	0	0	0
R_GLYPHEAP	'Gly-Phe aminopeptidase'	gly_phe_c + h2o_c <-> gly_c + phe__L_c		1	1	1	1	1	1	1	1	0	0	0
R_GLYPHEHYc	'Hydrolysis of glycylphenylalanine'	glyphe_c + h2o_c <-> gly_c + phe__L_c	EC Number: http://identifiers.org/ec-code/3.4.11.2; EC Number: http://identifiers.org/ec-code/3.4.13; MetaNetX (MNX) Equation: http://identifiers.org/metanetx.reaction/MNXR143145; SEED Reaction: http://identifiers.org/seed.reaction/rxn12846	0.25	0.5	0.5	0	0.0555556	0	0	0	0.25	0.5	0.444444
R_GLYTYRAP	'Gly-Try aminopeptidase'	gly_tyr_c + h2o_c <-> gly_c + tyr__L_c		1	1	1	1	1	1	1	1	0	0	0
R_GLYabc	'Glycine transport via ABC system'	atp_c + gly_e + h2o_c <-> adp_c + gly_c + h_c + pi_c	MetaNetX (MNX) Equation: http://identifiers.org/metanetx.reaction/MNXR100367; SEED Reaction: http://identifiers.org/seed.reaction/rxn10862; SEED Reaction: http://identifiers.org/seed.reaction/rxn12799	1	1	1	1	1	1	1	1	0	0	0
R_GPDDA1	'Glycerophosphodiester phosphodiesterase (Glycerophosphocholine)'	g3pc_c + h2o_c <-> chol_c + glyc3p_c + h_c	RHEA: http://identifiers.org/rhea/16061; RHEA: http://identifiers.org/rhea/16062; RHEA: http://identifiers.org/rhea/16063; RHEA: http://identifiers.org/rhea/16064; EC Number: http://identifiers.org/ec-code/3.1.4.2; EC Number: http://identifiers.org/ec-code/3.1.4.46; BioCyc: http://identifiers.org/biocyc/META:3.1.4.2-RXN; MetaNetX (MNX) Equation: http://identifiers.org/metanetx.reaction/MNXR100410…	0.5	0.5	0.666667	0.0357143	0.138889	0.133333	0.210526	0.119565	0	0.380435	0.527778
R_GPDDA2	'Glycerophosphodiester phosphodiesterase (Glycerophosphoethanolamine)'	g3pe_c + h2o_c <-> etha_c + glyc3p_c + h_c	RHEA: http://identifiers.org/rhea/29319; RHEA: http://identifiers.org/rhea/29320; RHEA: http://identifiers.org/rhea/29321; RHEA: http://identifiers.org/rhea/29322; EC Number: http://identifiers.org/ec-code/3.1.4.2; EC Number: http://identifiers.org/ec-code/3.1.4.46; BioCyc: http://identifiers.org/biocyc/META:RXN-14160; MetaNetX (MNX) Equation: http://identifiers.org/metanetx.reaction/MNXR100411; …	1	1	1	0.964286	0.972222	0.977778	1	0.978261	0	0.0217391	0.0277778
R_GPDDA3	'Glycerophosphodiester phosphodiesterase (Glycerophosphoserine)'	g3ps_c + h2o_c <-> glyc3p_c + h_c + ser__L_c	RHEA: http://identifiers.org/rhea/29875; RHEA: http://identifiers.org/rhea/29876; RHEA: http://identifiers.org/rhea/29877; RHEA: http://identifiers.org/rhea/29878; EC Number: http://identifiers.org/ec-code/3.1.4.46; BioCyc: http://identifiers.org/biocyc/META:RXN-14136; MetaNetX (MNX) Equation: http://identifiers.org/metanetx.reaction/MNXR100412; SEED Reaction: http://identifiers.org/seed.reaction…	1	0.7	1	0.928571	0.944444	1	0.947368	0.967391	-0.3	-0.267391	0.0555556
R_GPDDA4	'Glycerophosphodiester phosphodiesterase (Glycerophosphoglycerol)'	g3pg_c + h2o_c <-> glyc_c + glyc3p_c + h_c	EC Number: http://identifiers.org/ec-code/3.1.4.46; BioCyc: http://identifiers.org/biocyc/META:RXN-14073; MetaNetX (MNX) Equation: http://identifiers.org/metanetx.reaction/MNXR100413; SEED Reaction: http://identifiers.org/seed.reaction/rxn08669	1	1	1	1	1	1	1	1	0	0	0
R_GPDDA5	'Glycerophosphodiester phosphodiesterase (Glycerophosphoinositol)'	g3pi_c + h2o_c <-> glyc3p_c + h_c + inost_c	RHEA: http://identifiers.org/rhea/16501; RHEA: http://identifiers.org/rhea/16502; RHEA: http://identifiers.org/rhea/16503; RHEA: http://identifiers.org/rhea/16504; EC Number: http://identifiers.org/ec-code/3.1.4.44; BioCyc: http://identifiers.org/biocyc/META:3.1.4.44-RXN; MetaNetX (MNX) Equation: http://identifiers.org/metanetx.reaction/MNXR100414; Reactome Reaction: http://identifiers.org/reacto…	1	0.8	1	0.928571	0.944444	1	0.947368	0.967391	-0.2	-0.167391	0.0555556
R_GTHOr	'Glutathione oxidoreductase'	gthox_c + h_c + nadph_c <-> 2.0 gthrd_c + nadp_c	EC Number: http://identifiers.org/ec-code/1.8.1.7; RHEA: http://identifiers.org/rhea/11740; RHEA: http://identifiers.org/rhea/11741; RHEA: http://identifiers.org/rhea/11742; RHEA: http://identifiers.org/rhea/11743; BioCyc: http://identifiers.org/biocyc/META:GLUTATHIONE-REDUCT-NADPH-RXN; MetaNetX (MNX) Equation: http://identifiers.org/metanetx.reaction/MNXR100098; Reactome Reaction: http://identif…	1	1	1	1	1	1	1	1	0	0	0
R_GTHRDabc2pp	'Glutathione export via ABC system (cytoplasm to periplasm)'	atp_c + gthrd_c + h2o_c <-> adp_c + h_c + pi_c + gthrd_p	RHEA: http://identifiers.org/rhea/29787#1; RHEA: http://identifiers.org/rhea/29788#1; RHEA: http://identifiers.org/rhea/29789#1; RHEA: http://identifiers.org/rhea/29790#1; RHEA: http://identifiers.org/rhea/29791#2; RHEA: http://identifiers.org/rhea/29792#2; RHEA: http://identifiers.org/rhea/29793#2; RHEA: http://identifiers.org/rhea/29794#2; BioCyc: http://identifiers.org/biocyc/META:RXN0-21; Met…	1	1	1	1	1	0.911111	1	0.956522	0	0.0434783	0
R_GTHRDabcpp	'Reduced glutathione via ABC system (periplasm)'	atp_c + h2o_c + gthrd_p <-> adp_c + gthrd_c + h_c + pi_c	RHEA: http://identifiers.org/rhea/29787#2; RHEA: http://identifiers.org/rhea/29788#2; RHEA: http://identifiers.org/rhea/29789#2; RHEA: http://identifiers.org/rhea/29790#2; RHEA: http://identifiers.org/rhea/29791#1; RHEA: http://identifiers.org/rhea/29792#1; RHEA: http://identifiers.org/rhea/29793#1; RHEA: http://identifiers.org/rhea/29794#1; BioCyc: http://identifiers.org/biocyc/META:RXN0-11; Met…	0.375	0.6	0.666667	0	0.0833333	0	0	0	0.225	0.6	0.583333
R_GTHRDt2_1	'Glutathione transport'	atp_c + gthrd_e + h2o_c <-> adp_c + gthrd_c + h_c + pi_c		0.875	1	1	1	0.972222	0.977778	1	0.98913	0.125	0.0108696	0.0277778
R_GUAPRT	'Guanine phosphoribosyltransferase'	gua_c + prpp_c <-> gmp_c + ppi_c	EC Number: http://identifiers.org/ec-code/2.4.2.22; EC Number: http://identifiers.org/ec-code/2.4.2.7; EC Number: http://identifiers.org/ec-code/2.4.2.8; RHEA: http://identifiers.org/rhea/25424; RHEA: http://identifiers.org/rhea/25425; RHEA: http://identifiers.org/rhea/25426; RHEA: http://identifiers.org/rhea/25427; BioCyc: http://identifiers.org/biocyc/META:GUANPRIBOSYLTRAN-RXN; MetaNetX (MNX) E…	1	1	1	1	1	1	1	1	0	0	0
R_H2Ot	'H2O transport via diffusion'	h2o_e <-> h2o_c	RHEA: http://identifiers.org/rhea/29667; RHEA: http://identifiers.org/rhea/29668; RHEA: http://identifiers.org/rhea/29669; RHEA: http://identifiers.org/rhea/29670; BioCyc: http://identifiers.org/biocyc/META:TRANS-RXN-145; BioCyc: http://identifiers.org/biocyc/META:TRANS-RXN0-547; MetaNetX (MNX) Equation: http://identifiers.org/metanetx.reaction/MNXR98641; Reactome Reaction: http://identifiers.org…	1	1	1	1	1	1	1	1	0	0	0
R_H2Otex	'H2O transport via diffusion (extracellular to periplasm)'	h2o_e <-> h2o_p	RHEA: http://identifiers.org/rhea/29667; RHEA: http://identifiers.org/rhea/29668; RHEA: http://identifiers.org/rhea/29669; RHEA: http://identifiers.org/rhea/29670; BioCyc: http://identifiers.org/biocyc/META:TRANS-RXN-145; BioCyc: http://identifiers.org/biocyc/META:TRANS-RXN0-547; MetaNetX (MNX) Equation: http://identifiers.org/metanetx.reaction/MNXR98641; Reactome Reaction: http://identifiers.org…	1	1	1	1	1	1	1	1	0	0	0
R_H2Otpp	'H2O transport via diffusion (periplasm)'	h2o_p <-> h2o_c	RHEA: http://identifiers.org/rhea/29667; RHEA: http://identifiers.org/rhea/29668; RHEA: http://identifiers.org/rhea/29669; RHEA: http://identifiers.org/rhea/29670; BioCyc: http://identifiers.org/biocyc/META:TRANS-RXN-145; BioCyc: http://identifiers.org/biocyc/META:TRANS-RXN0-547; MetaNetX (MNX) Equation: http://identifiers.org/metanetx.reaction/MNXR98641; Reactome Reaction: http://identifiers.org…	1	1	1	1	1	1	1	1	0	0	0
R_H2SO	'Hydrogen sulfide oxidation'	h2s_c + 2.0 o2_c <-> 2.0 h_c + so4_c	MetaNetX (MNX) Equation: http://identifiers.org/metanetx.reaction/MNXR100493; SEED Reaction: http://identifiers.org/seed.reaction/rxn08688	1	1	1	1	1	0.977778	1	0.98913	0	0.0108696	0
R_H2St1	'H2s transport (diffusion)'	h2s_c <-> h2s_e	BioCyc: http://identifiers.org/biocyc/META:TRANS-RXN-310; MetaNetX (MNX) Equation: http://identifiers.org/metanetx.reaction/MNXR100494; SEED Reaction: http://identifiers.org/seed.reaction/rxn08689; SEED Reaction: http://identifiers.org/seed.reaction/rxn08690; SEED Reaction: http://identifiers.org/seed.reaction/rxn10541	1	1	1	1	1	1	1	1	0	0	0
R_HCO3E	'HCO3 equilibration reaction'	co2_c + h2o_c <-> h_c + hco3_c	RHEA: http://identifiers.org/rhea/10748; RHEA: http://identifiers.org/rhea/10749; RHEA: http://identifiers.org/rhea/10750; RHEA: http://identifiers.org/rhea/10751; EC Number: http://identifiers.org/ec-code/4.2.1.1; BioCyc: http://identifiers.org/biocyc/META:CARBODEHYDRAT-RXN; BioCyc: http://identifiers.org/biocyc/META:RXN0-5224; MetaNetX (MNX) Equation: http://identifiers.org/metanetx.reaction/MN…	1	1	1	1	1	1	1	1	0	0	0
R_HCYSMT	'Homocysteine S-methyltransferase'	amet_c + hcys__L_c <-> ahcys_c + h_c + met__L_c	EC Number: http://identifiers.org/ec-code/2.1.1; EC Number: http://identifiers.org/ec-code/2.1.1.10; RHEA: http://identifiers.org/rhea/21820; RHEA: http://identifiers.org/rhea/21821; RHEA: http://identifiers.org/rhea/21822; RHEA: http://identifiers.org/rhea/21823; BioCyc: http://identifiers.org/biocyc/META:HOMOCYSTEINE-S-METHYLTRANSFERASE-RXN; MetaNetX (MNX) Equation: http://identifiers.org/metan…	1	1	1	1	1	1	1	1	0	0	0
R_HEX1	'Hexokinase (D-glucose:ATP)'	atp_c + glc__D_c <-> adp_c + g6p_c + h_c	RHEA: http://identifiers.org/rhea/17825; RHEA: http://identifiers.org/rhea/17826; RHEA: http://identifiers.org/rhea/17827; RHEA: http://identifiers.org/rhea/17828; EC Number: http://identifiers.org/ec-code/2.7.1.1; EC Number: http://identifiers.org/ec-code/2.7.1.2; BioCyc: http://identifiers.org/biocyc/META:GLUCOKIN-RXN; MetaNetX (MNX) Equation: http://identifiers.org/metanetx.reaction/MNXR100612…	1	1	1	1	1	1	1	1	0	0	0
R_HISabc	'L-histidine transport via ABC system'	atp_c + h2o_c + his__L_e <-> adp_c + h_c + his__L_c + pi_c	RHEA: http://identifiers.org/rhea/29891#1; RHEA: http://identifiers.org/rhea/29892#1; RHEA: http://identifiers.org/rhea/29893#1; RHEA: http://identifiers.org/rhea/29894#1; EC Number: http://identifiers.org/ec-code/3.6.3.21; BioCyc: http://identifiers.org/biocyc/META:ABC-14-RXN; MetaNetX (MNX) Equation: http://identifiers.org/metanetx.reaction/MNXR100644; SEED Reaction: http://identifiers.org/seed…	1	1	1	1	1	1	1	1	0	0	0
R_HXPRT	'Hypoxanthine phosphoribosyltransferase (Hypoxanthine)'	hxan_c + prpp_c <-> imp_c + ppi_c	RHEA: http://identifiers.org/rhea/17973; RHEA: http://identifiers.org/rhea/17974; RHEA: http://identifiers.org/rhea/17975; RHEA: http://identifiers.org/rhea/17976; EC Number: http://identifiers.org/ec-code/2.4.2.8; BioCyc: http://identifiers.org/biocyc/META:HYPOXANPRIBOSYLTRAN-RXN; MetaNetX (MNX) Equation: http://identifiers.org/metanetx.reaction/MNXR100752; KEGG Reaction: http://identifiers.org/…	1	1	1	1	1	1	1	1	0	0	0
R_IDPh_1	'Inorganic diphosphatase'	h2o_c + ppi_c <-> 2.0 pi_c		1	1	1	1	1	1	1	1	0	0	0
R_ILEabc	'L-isoleucine transport via ABC system'	atp_c + h2o_c + ile__L_e <-> adp_c + h_c + ile__L_c + pi_c	RHEA: http://identifiers.org/rhea/29819#1; RHEA: http://identifiers.org/rhea/29820#1; RHEA: http://identifiers.org/rhea/29821#1; RHEA: http://identifiers.org/rhea/29822#1; BioCyc: http://identifiers.org/biocyc/META:ABC-15-RXN; MetaNetX (MNX) Equation: http://identifiers.org/metanetx.reaction/MNXR100821; SEED Reaction: http://identifiers.org/seed.reaction/rxn05179; SEED Reaction: http://identifier…	1	1	1	1	1	1	1	1	0	0	0
R_INSTabc	'Inositol transport in via ABC transport'	atp_c + h2o_c + inost_e <-> adp_c + h_c + inost_c + pi_c	MetaNetX (MNX) Equation: http://identifiers.org/metanetx.reaction/MNXR100846	1	1	1	1	1	1	1	1	0	0	0
R_KG6PDC	'3-keto-L-gulonate 6-phosphate decarboxylase'	3dhgulnp_c + h_c <-> co2_c + xu5p__L_c	RHEA: http://identifiers.org/rhea/14353; RHEA: http://identifiers.org/rhea/14354; RHEA: http://identifiers.org/rhea/14355; RHEA: http://identifiers.org/rhea/14356; EC Number: http://identifiers.org/ec-code/4.1.1.85; BioCyc: http://identifiers.org/biocyc/META:RXN0-705; MetaNetX (MNX) Equation: http://identifiers.org/metanetx.reaction/MNXR100935; KEGG Reaction: http://identifiers.org/kegg.reaction/…	1	1	1	1	1	1	1	1	0	0	0
R_Kt1	'Potassium transport via uniport (facilitated diffusion)'	k_e <-> k_c	RHEA: http://identifiers.org/rhea/29463; RHEA: http://identifiers.org/rhea/29464; RHEA: http://identifiers.org/rhea/29465; RHEA: http://identifiers.org/rhea/29466; BioCyc: http://identifiers.org/biocyc/META:TRANS-RXN-143; BioCyc: http://identifiers.org/biocyc/META:TRANS-RXN-185; BioCyc: http://identifiers.org/biocyc/META:TRANS-RXN-186; BioCyc: http://identifiers.org/biocyc/META:TRANS-RXN-187; Bio…	1	0.7	0.666667	1	1	1	1	1	-0.3	-0.3	-0.333333
R_Kt2pp	'Potassium transport in via proton symport (periplasm)'	h_p + k_p <-> h_c + k_c	RHEA: http://identifiers.org/rhea/28490; RHEA: http://identifiers.org/rhea/28491; RHEA: http://identifiers.org/rhea/28492; RHEA: http://identifiers.org/rhea/28493; BioCyc: http://identifiers.org/biocyc/META:TRANS-RXN-3; MetaNetX (MNX) Equation: http://identifiers.org/metanetx.reaction/MNXR100951; SEED Reaction: http://identifiers.org/seed.reaction/rxn05595; SEED Reaction: http://identifiers.org/s…	0.25	0.4	0.5	0	0.0555556	0	0	0	0.15	0.4	0.444444
R_Kt2r	'Potassium reversible transport via proton symport'	h_e + k_e <-> h_c + k_c	RHEA: http://identifiers.org/rhea/28490; RHEA: http://identifiers.org/rhea/28491; RHEA: http://identifiers.org/rhea/28492; RHEA: http://identifiers.org/rhea/28493; BioCyc: http://identifiers.org/biocyc/META:TRANS-RXN-3; MetaNetX (MNX) Equation: http://identifiers.org/metanetx.reaction/MNXR100951; SEED Reaction: http://identifiers.org/seed.reaction/rxn05595; SEED Reaction: http://identifiers.org/s…	1	1	1	1	1	1	1	1	0	0	0
R_LALGP	'L-alanyl-gamma-L-glutamate peptidase'	LalaLglu_c + h2o_c <-> ala__L_c + glu__L_c	RHEA: http://identifiers.org/rhea/29335; RHEA: http://identifiers.org/rhea/29336; RHEA: http://identifiers.org/rhea/29337; RHEA: http://identifiers.org/rhea/29338; EC Number: http://identifiers.org/ec-code/3.4.13.18; BioCyc: http://identifiers.org/biocyc/META:RXN0-6981; MetaNetX (MNX) Equation: http://identifiers.org/metanetx.reaction/MNXR101011; SEED Reaction: http://identifiers.org/seed.reactio…	1	1	1	1	1	1	1	1	0	0	0
R_LDH_L	'L-lactate dehydrogenase'	lac__L_c + nad_c <-> h_c + nadh_c + pyr_c	EC Number: http://identifiers.org/ec-code/1.1.1.27; RHEA: http://identifiers.org/rhea/23444; RHEA: http://identifiers.org/rhea/23445; RHEA: http://identifiers.org/rhea/23446; RHEA: http://identifiers.org/rhea/23447; BioCyc: http://identifiers.org/biocyc/META:L-LACTATE-DEHYDROGENASE-RXN; MetaNetX (MNX) Equation: http://identifiers.org/metanetx.reaction/MNXR101040; Reactome Reaction: http://identif…	1	1	1	1	1	1	1	1	0	0	0
R_LEULEULAPc	'Hydrolysis of Leucylleucine in the small intestine for cellular uptake'	h2o_c + leuleu_c <-> 2.0 leu__L_c	EC Number: http://identifiers.org/ec-code/3.4.13; MetaNetX (MNX) Equation: http://identifiers.org/metanetx.reaction/MNXR101050	0.25	0.7	0.833333	0.0357143	0.0833333	0	0.0526316	0.0217391	0.45	0.678261	0.75
R_LEUabc	'L-leucine transport via ABC system'	atp_c + h2o_c + leu__L_e <-> adp_c + h_c + leu__L_c + pi_c	RHEA: http://identifiers.org/rhea/29807#1; RHEA: http://identifiers.org/rhea/29808#1; RHEA: http://identifiers.org/rhea/29809#1; RHEA: http://identifiers.org/rhea/29810#1; BioCyc: http://identifiers.org/biocyc/META:ABC-35-RXN; MetaNetX (MNX) Equation: http://identifiers.org/metanetx.reaction/MNXR101054; SEED Reaction: http://identifiers.org/seed.reaction/rxn05161; SEED Reaction: http://identifier…	1	1	1	1	1	1	1	1	0	0	0
R_LIPAMPL	'Lipoyl-adenylate protein ligase'	lipoamp_c <-> amp_c + lipopb_c	MetaNetX (MNX) Equation: http://identifiers.org/metanetx.reaction/MNXR101080	1	1	1	1	1	1	1	1	0	0	0
R_LIPATPT_2	'Lipoate-ATP adenylate transferase'	atp_c + h_c + lipoate_c <-> lipoamp_c + ppi_c		1	1	1	1	1	1	1	1	0	0	0
R_LIPOPBt	'Lipoate transport via proton symport'	h_e + lipoate_e <-> h_c + lipoate_c		1	1	1	1	1	1	1	1	0	0	0
R_LYSabc	'L-lysine transport via ABC system'	atp_c + h2o_c + lys__L_e <-> adp_c + h_c + lys__L_c + pi_c	RHEA: http://identifiers.org/rhea/29887#1; RHEA: http://identifiers.org/rhea/29888#1; RHEA: http://identifiers.org/rhea/29889#1; RHEA: http://identifiers.org/rhea/29890#1; EC Number: http://identifiers.org/ec-code/3.6.3.21; BioCyc: http://identifiers.org/biocyc/META:ABC-3-RXN; MetaNetX (MNX) Equation: http://identifiers.org/metanetx.reaction/MNXR101265; SEED Reaction: http://identifiers.org/seed.…	1	1	1	1	1	1	1	1	0	0	0
R_LYSabcpp	'L-lysine transport via ABC system (periplasm)'	atp_c + h2o_c + lys__L_p <-> adp_c + h_c + lys__L_c + pi_c	RHEA: http://identifiers.org/rhea/29887#1; RHEA: http://identifiers.org/rhea/29888#1; RHEA: http://identifiers.org/rhea/29889#1; RHEA: http://identifiers.org/rhea/29890#1; EC Number: http://identifiers.org/ec-code/3.6.3.21; BioCyc: http://identifiers.org/biocyc/META:ABC-3-RXN; MetaNetX (MNX) Equation: http://identifiers.org/metanetx.reaction/MNXR101265; SEED Reaction: http://identifiers.org/seed.…	1	0.7	0.666667	0.964286	0.972222	1	1	0.98913	-0.3	-0.28913	-0.305556
R_LacR	'Lactate racemase'	lac__L_c <-> lac__D_c	RHEA: http://identifiers.org/rhea/10960; RHEA: http://identifiers.org/rhea/10961; RHEA: http://identifiers.org/rhea/10962; RHEA: http://identifiers.org/rhea/10963; EC Number: http://identifiers.org/ec-code/5.1.2.1; BioCyc: http://identifiers.org/biocyc/META:LACTATE-RACEMASE-RXN; MetaNetX (MNX) Equation: http://identifiers.org/metanetx.reaction/MNXR101281; KEGG Reaction: http://identifiers.org/keg…	1	1	1	1	1	1	1	1	0	0	0
R_M1PD	'Mannitol-1-phosphate 5-dehydrogenase'	mnl1p_c + nad_c <-> f6p_c + h_c + nadh_c	EC Number: http://identifiers.org/ec-code/1.1.1.17; RHEA: http://identifiers.org/rhea/19661; RHEA: http://identifiers.org/rhea/19662; RHEA: http://identifiers.org/rhea/19663; RHEA: http://identifiers.org/rhea/19664; BioCyc: http://identifiers.org/biocyc/META:MANNPDEHYDROG-RXN; MetaNetX (MNX) Equation: http://identifiers.org/metanetx.reaction/MNXR101311; KEGG Reaction: http://identifiers.org/kegg.…	1	1	1	0.892857	0.916667	0.955556	0.947368	0.934783	0	0.0652174	0.0833333
R_MALT	'Alpha glucosidase'	h2o_c + malt_c <-> 2.0 glc__D_c	EC Number: http://identifiers.org/ec-code/3.2.1.20; BioCyc: http://identifiers.org/biocyc/META:RXN-15910; MetaNetX (MNX) Equation: http://identifiers.org/metanetx.reaction/MNXR101350; KEGG Reaction: http://identifiers.org/kegg.reaction/R00028; SEED Reaction: http://identifiers.org/seed.reaction/rxn00022	1	1	1	0.964286	0.972222	1	0.947368	0.978261	0	0.0217391	0.0277778
R_MALTHPabc	'MALTHPabc'	atp_c + h2o_c + malthp_e <-> adp_c + h_c + malthp_c + pi_c	MetaNetX (MNX) Equation: http://identifiers.org/metanetx.reaction/MNXR101352; SEED Reaction: http://identifiers.org/seed.reaction/rxn10833	1	0.9	1	0.964286	0.972222	1	1	0.98913	-0.1	-0.0891304	0.0277778
R_MALTHXabc	'Maltohexaose transport via ABC system'	atp_c + h2o_c + malthx_e <-> adp_c + h_c + malthx_c + pi_c	MetaNetX (MNX) Equation: http://identifiers.org/metanetx.reaction/MNXR101353; SEED Reaction: http://identifiers.org/seed.reaction/rxn08869; SEED Reaction: http://identifiers.org/seed.reaction/rxn10174	1	0.9	1	1	1	1	1	1	-0.1	-0.1	0
R_MALTHXabcpp	'Maltohexaose transport via ABC system (periplasm)'	atp_c + h2o_c + malthx_p <-> adp_c + h_c + malthx_c + pi_c	MetaNetX (MNX) Equation: http://identifiers.org/metanetx.reaction/MNXR101353; SEED Reaction: http://identifiers.org/seed.reaction/rxn08869; SEED Reaction: http://identifiers.org/seed.reaction/rxn10174	1	0.9	1	1	1	1	1	1	-0.1	-0.1	0
R_MALTTRabc	'Maltotriose transport via ABC system'	atp_c + h2o_c + malttr_e <-> adp_c + h_c + malttr_c + pi_c	EC Number: http://identifiers.org/ec-code/3.6.3; BioCyc: http://identifiers.org/biocyc/META:TRANS-RXN0-503; MetaNetX (MNX) Equation: http://identifiers.org/metanetx.reaction/MNXR101358; SEED Reaction: http://identifiers.org/seed.reaction/rxn05608; SEED Reaction: http://identifiers.org/seed.reaction/rxn08875	1	0.8	0.833333	1	1	1	1	1	-0.2	-0.2	-0.166667
R_MALTabc	'Maltose transport via ABC system'	atp_c + h2o_c + malt_e <-> adp_c + h_c + malt_c + pi_c	RHEA: http://identifiers.org/rhea/22132#1; RHEA: http://identifiers.org/rhea/22133#1; RHEA: http://identifiers.org/rhea/22134#1; RHEA: http://identifiers.org/rhea/22135#1; EC Number: http://identifiers.org/ec-code/3.6.3.19; BioCyc: http://identifiers.org/biocyc/META:3.6.3.19-RXN; BioCyc: http://identifiers.org/biocyc/META:ABC-16-RXN; MetaNetX (MNX) Equation: http://identifiers.org/metanetx.reacti…	1	1	1	1	1	1	1	1	0	0	0
R_MALTpts	'Maltose transport via PEP:Pyr PTS'	malt_e + pep_c <-> malt6p_c + pyr_c	MetaNetX (MNX) Equation: http://identifiers.org/metanetx.reaction/MNXR101363; SEED Reaction: http://identifiers.org/seed.reaction/rxn05607; SEED Reaction: http://identifiers.org/seed.reaction/rxn08872	1	1	1	1	1	1	1	1	0	0	0
R_MAN6PI	'Mannose-6-phosphate isomerase'	man6p_c <-> f6p_c	EC Number: http://identifiers.org/ec-code/5.3.1.8; BioCyc: http://identifiers.org/biocyc/META:MANNPISOM-RXN; MetaNetX (MNX) Equation: http://identifiers.org/metanetx.reaction/MNXR101382; KEGG Reaction: http://identifiers.org/kegg.reaction/R01819	1	1	1	1	1	0.977778	1	0.98913	0	0.0108696	0
R_MANpts	'D-mannose transport via PEP:Pyr PTS'	man_e + pep_c <-> man6p_c + pyr_c	MetaNetX (MNX) Equation: http://identifiers.org/metanetx.reaction/MNXR101401; SEED Reaction: http://identifiers.org/seed.reaction/rxn05610; SEED Reaction: http://identifiers.org/seed.reaction/rxn08885	1	1	1	1	1	1	1	1	0	0	0
R_MDH	'Malate dehydrogenase'	mal__L_c + nad_c <-> h_c + nadh_c + oaa_c	EC Number: http://identifiers.org/ec-code/1.1.1.299; EC Number: http://identifiers.org/ec-code/1.1.1.37; RHEA: http://identifiers.org/rhea/21432; RHEA: http://identifiers.org/rhea/21433; RHEA: http://identifiers.org/rhea/21434; RHEA: http://identifiers.org/rhea/21435; BioCyc: http://identifiers.org/biocyc/META:MALATE-DEH-RXN; MetaNetX (MNX) Equation: http://identifiers.org/metanetx.reaction/MNXR1…	1	1	1	0.964286	0.972222	1	1	0.98913	0	0.0108696	0.0277778
R_METAT	'Methionine adenosyltransferase'	atp_c + h2o_c + met__L_c <-> amet_c + pi_c + ppi_c	EC Number: http://identifiers.org/ec-code/2.5.1.6; RHEA: http://identifiers.org/rhea/21080; RHEA: http://identifiers.org/rhea/21081; RHEA: http://identifiers.org/rhea/21082; RHEA: http://identifiers.org/rhea/21083; BioCyc: http://identifiers.org/biocyc/META:S-ADENMETSYN-RXN; MetaNetX (MNX) Equation: http://identifiers.org/metanetx.reaction/MNXR101407; Reactome Reaction: http://identifiers.org/rea…	1	1	1	1	1	1	1	1	0	0	0
R_METDabc	'D-methionine transport via ABC system'	atp_c + h2o_c + met__D_e <-> adp_c + h_c + met__D_c + pi_c	RHEA: http://identifiers.org/rhea/29767#1; RHEA: http://identifiers.org/rhea/29768#1; RHEA: http://identifiers.org/rhea/29769#1; RHEA: http://identifiers.org/rhea/29770#1; BioCyc: http://identifiers.org/biocyc/META:TRANS-RXN0-202; MetaNetX (MNX) Equation: http://identifiers.org/metanetx.reaction/MNXR101472; SEED Reaction: http://identifiers.org/seed.reaction/rxn05183; SEED Reaction: http://identi…	1	0.9	0.833333	1	1	1	1	1	-0.1	-0.1	-0.166667
R_METOX1s	'Methionine oxidation (spontaneous)'	h2o2_c + met__L_c <-> h2o_c + metsox_S__L_c	MetaNetX (MNX) Equation: http://identifiers.org/metanetx.reaction/MNXR101479; SEED Reaction: http://identifiers.org/seed.reaction/rxn08912; SEED Reaction: http://identifiers.org/seed.reaction/rxn09942	1	1	1	1	1	1	1	1	0	0	0
R_METOX2s	'Methionine oxidation 2 (spontaneous)'	h2o2_c + met__L_c <-> h2o_c + metsox_R__L_c	BioCyc: http://identifiers.org/biocyc/META:RXN0-7188; MetaNetX (MNX) Equation: http://identifiers.org/metanetx.reaction/MNXR138590; SEED Reaction: http://identifiers.org/seed.reaction/rxn08913	1	1	1	1	1	1	1	1	0	0	0
R_METSOXR1	'L-methionine-S-oxide reductase'	metsox_S__L_c + trdrd_c <-> h2o_c + met__L_c + trdox_c	EC Number: http://identifiers.org/ec-code/1.8.4.13; EC Number: http://identifiers.org/ec-code/1.8.4.14; MetaNetX (MNX) Equation: http://identifiers.org/metanetx.reaction/MNXR101484; KEGG Reaction: http://identifiers.org/kegg.reaction/R02025; SEED Reaction: http://identifiers.org/seed.reaction/rxn06077; SEED Reaction: http://identifiers.org/seed.reaction/rxn08918	1	1	1	1	1	1	1	1	0	0	0
R_METSOXR2	'L-methionine-R-sulfoxide reductase'	metsox_R__L_c + trdrd_c <-> h2o_c + met__L_c + trdox_c	EC Number: http://identifiers.org/ec-code/1.8.4.14; BioCyc: http://identifiers.org/biocyc/META:1.8.4.14-RXN; MetaNetX (MNX) Equation: http://identifiers.org/metanetx.reaction/MNXR138594; KEGG Reaction: http://identifiers.org/kegg.reaction/R07608; SEED Reaction: http://identifiers.org/seed.reaction/rxn07439; SEED Reaction: http://identifiers.org/seed.reaction/rxn08919	1	1	1	1	1	1	1	1	0	0	0
R_METSR_S1	'L methionine S oxide reductase trdrd'	metox_c + trdrd_c <-> h2o_c + met__L_c + trdox_c	EC Number: http://identifiers.org/ec-code/1.8.4.13; EC Number: http://identifiers.org/ec-code/1.8.4.14; MetaNetX (MNX) Equation: http://identifiers.org/metanetx.reaction/MNXR101484; KEGG Reaction: http://identifiers.org/kegg.reaction/R02025; SEED Reaction: http://identifiers.org/seed.reaction/rxn06077; SEED Reaction: http://identifiers.org/seed.reaction/rxn08918	1	1	1	1	1	1	0.894737	0.978261	0	0.0217391	0
R_METabc	'L-methionine transport via ABC system'	atp_c + h2o_c + met__L_e <-> adp_c + h_c + met__L_c + pi_c	RHEA: http://identifiers.org/rhea/29779#2; RHEA: http://identifiers.org/rhea/29780#2; RHEA: http://identifiers.org/rhea/29781#2; RHEA: http://identifiers.org/rhea/29782#2; RHEA: http://identifiers.org/rhea/32827#1; RHEA: http://identifiers.org/rhea/32828#1; RHEA: http://identifiers.org/rhea/32829#1; RHEA: http://identifiers.org/rhea/32830#1; BioCyc: http://identifiers.org/biocyc/META:RXN0-4522; M…	1	1	1	1	1	1	1	1	0	0	0
R_METabcpp	'L-methionine transport via ABC system (periplasm)'	atp_c + h2o_c + met__L_p <-> adp_c + h_c + met__L_c + pi_c	RHEA: http://identifiers.org/rhea/29779#2; RHEA: http://identifiers.org/rhea/29780#2; RHEA: http://identifiers.org/rhea/29781#2; RHEA: http://identifiers.org/rhea/29782#2; RHEA: http://identifiers.org/rhea/32827#1; RHEA: http://identifiers.org/rhea/32828#1; RHEA: http://identifiers.org/rhea/32829#1; RHEA: http://identifiers.org/rhea/32830#1; BioCyc: http://identifiers.org/biocyc/META:RXN0-4522; M…	1	1	1	1	1	1	1	1	0	0	0
R_MG2uabcpp	'Magnesium (Mg+2) ABC transporter (ubtake, periplasm)'	atp_c + h2o_c + mg2_p <-> adp_c + h_c + mg2_c + pi_c	RHEA: http://identifiers.org/rhea/10260#1; RHEA: http://identifiers.org/rhea/10261#1; RHEA: http://identifiers.org/rhea/10262#1; RHEA: http://identifiers.org/rhea/10263#1; EC Number: http://identifiers.org/ec-code/3.6.3.2; BioCyc: http://identifiers.org/biocyc/META:3.6.3.2-RXN; BioCyc: http://identifiers.org/biocyc/META:TRANS-RXN-250; MetaNetX (MNX) Equation: http://identifiers.org/metanetx.react…	1	1	1	1	1	1	1	1	0	0	0
R_MGt5	'Magnesium transport in/out via permease (no H+)'	mg2_c <-> mg2_e	RHEA: http://identifiers.org/rhea/29827; RHEA: http://identifiers.org/rhea/29828; RHEA: http://identifiers.org/rhea/29829; RHEA: http://identifiers.org/rhea/29830; BioCyc: http://identifiers.org/biocyc/META:TRANS-RXN-141; MetaNetX (MNX) Equation: http://identifiers.org/metanetx.reaction/MNXR101507; Reactome Reaction: http://identifiers.org/reactome/R-ATH-5336453; Reactome Reaction: http://identif…	1	1	1	1	1	1	1	1	0	0	0
R_MLTG1	'Maltodextrin glucosidase (maltotriose)'	h2o_c + malttr_c <-> glc__D_c + malt_c	EC Number: http://identifiers.org/ec-code/3.2.1.20; BioCyc: http://identifiers.org/biocyc/META:RXN0-5183; MetaNetX (MNX) Equation: http://identifiers.org/metanetx.reaction/MNXR101619; SEED Reaction: http://identifiers.org/seed.reaction/rxn05746	1	1	1	1	1	1	1	1	0	0	0
R_MLTG2	'Maltodextrin glucosidase (maltotetraose)'	h2o_c + maltttr_c <-> glc__D_c + malttr_c	BioCyc: http://identifiers.org/biocyc/META:MALTET-RXN; MetaNetX (MNX) Equation: http://identifiers.org/metanetx.reaction/MNXR101620; SEED Reaction: http://identifiers.org/seed.reaction/rxn08933	1	0.8	1	1	1	1	1	1	-0.2	-0.2	0
R_MLTG3	'Maltodextrin glucosidase (maltopentaose)'	h2o_c + maltpt_c <-> glc__D_c + maltttr_c	EC Number: http://identifiers.org/ec-code/3.2.1.20; EC Number: http://identifiers.org/ec-code/3.2.1.74; BioCyc: http://identifiers.org/biocyc/META:RXN-14281; MetaNetX (MNX) Equation: http://identifiers.org/metanetx.reaction/MNXR101621; SEED Reaction: http://identifiers.org/seed.reaction/rxn08934	1	0.6	0.833333	0.964286	0.972222	1	0.947368	0.978261	-0.4	-0.378261	-0.138889
R_MLTG4	'Maltodextrin glucosidase (maltohexaose)'	h2o_c + malthx_c <-> glc__D_c + maltpt_c	EC Number: http://identifiers.org/ec-code/3.2.1.20; BioCyc: http://identifiers.org/biocyc/META:RXN-14282; MetaNetX (MNX) Equation: http://identifiers.org/metanetx.reaction/MNXR101622; SEED Reaction: http://identifiers.org/seed.reaction/rxn08935	1	0.6	0.833333	0.964286	0.972222	1	0.947368	0.978261	-0.4	-0.378261	-0.138889
R_MLTG5	'Maltodextrin glucosidase (maltoheptaose)'	h2o_c + malthp_c <-> glc__D_c + malthx_c	EC Number: http://identifiers.org/ec-code/3.2.1.20; BioCyc: http://identifiers.org/biocyc/META:RXN-14283; MetaNetX (MNX) Equation: http://identifiers.org/metanetx.reaction/MNXR101623; SEED Reaction: http://identifiers.org/seed.reaction/rxn08936	1	0.6	0.833333	0.964286	0.972222	1	0.947368	0.978261	-0.4	-0.378261	-0.138889
R_MLTG6	'Maltodextrin glucosidase dextrin'	dextrin_c + 2.0 h2o_c <-> 2.0 glc__D_c	MetaNetX (MNX) Equation: http://identifiers.org/metanetx.reaction/MNXR101624; SEED Reaction: http://identifiers.org/seed.reaction/rxn10401	1	0.6	0.833333	0.964286	0.972222	1	0.947368	0.978261	-0.4	-0.378261	-0.138889
R_MN6PP	'Mannose 6-phosphate phosphatase'	h2o_c + man6p_c <-> man_c + pi_c	RHEA: http://identifiers.org/rhea/28554; RHEA: http://identifiers.org/rhea/28555; RHEA: http://identifiers.org/rhea/28556; RHEA: http://identifiers.org/rhea/28557; MetaNetX (MNX) Equation: http://identifiers.org/metanetx.reaction/MNXR101671; SEED Reaction: http://identifiers.org/seed.reaction/rxn08948	0.875	0.7	0.5	0.964286	0.944444	1	1	0.98913	-0.175	-0.28913	-0.444444
R_MNLpts	'Mannitol transport via PEP:Pyr PTS'	mnl_e + pep_c <-> mnl1p_c + pyr_c	MetaNetX (MNX) Equation: http://identifiers.org/metanetx.reaction/MNXR101677; SEED Reaction: http://identifiers.org/seed.reaction/rxn05617; SEED Reaction: http://identifiers.org/seed.reaction/rxn08949; SEED Reaction: http://identifiers.org/seed.reaction/rxn13934; SEED Reaction: http://identifiers.org/seed.reaction/rxn13944	1	1	1	1	1	1	1	1	0	0	0
R_MNLptspp	'Mannitol transport via PEP:Pyr PTS (periplasm)'	pep_c + mnl_p <-> mnl1p_c + pyr_c	MetaNetX (MNX) Equation: http://identifiers.org/metanetx.reaction/MNXR101677; SEED Reaction: http://identifiers.org/seed.reaction/rxn05617; SEED Reaction: http://identifiers.org/seed.reaction/rxn08949; SEED Reaction: http://identifiers.org/seed.reaction/rxn13934; SEED Reaction: http://identifiers.org/seed.reaction/rxn13944	1	1	1	0.892857	0.916667	0.933333	0.947368	0.923913	0	0.076087	0.0833333
R_MNabc	'Manganese transport via ABC system'	atp_c + h2o_c + mn2_e <-> adp_c + h_c + mn2_c + pi_c	RHEA: http://identifiers.org/rhea/17365#1; RHEA: http://identifiers.org/rhea/17366#1; RHEA: http://identifiers.org/rhea/17367#1; RHEA: http://identifiers.org/rhea/17368#1; EC Number: http://identifiers.org/ec-code/3.6.3.35; BioCyc: http://identifiers.org/biocyc/META:3.6.3.35-RXN; MetaNetX (MNX) Equation: http://identifiers.org/metanetx.reaction/MNXR101680; SEED Reaction: http://identifiers.org/se…	1	1	1	1	1	1	1	1	0	0	0
R_MOBDabc	'Molybdate transport via ABC system'	atp_c + h2o_c + mobd_e <-> adp_c + h_c + mobd_c + pi_c	RHEA: http://identifiers.org/rhea/22020#1; RHEA: http://identifiers.org/rhea/22021#1; RHEA: http://identifiers.org/rhea/22022#1; RHEA: http://identifiers.org/rhea/22023#1; EC Number: http://identifiers.org/ec-code/3.6.3.29; BioCyc: http://identifiers.org/biocyc/META:3.6.3.29-RXN; BioCyc: http://identifiers.org/biocyc/META:ABC-19-RXN; MetaNetX (MNX) Equation: http://identifiers.org/metanetx.reacti…	1	1	1	1	1	1	1	1	0	0	0
R_MPL	'Maltose phosphorylase'	malt_c + pi_c <-> g1p_B_c + glc__D_c	EC Number: http://identifiers.org/ec-code/2.4.1.8; RHEA: http://identifiers.org/rhea/21116; RHEA: http://identifiers.org/rhea/21117; RHEA: http://identifiers.org/rhea/21118; RHEA: http://identifiers.org/rhea/21119; BioCyc: http://identifiers.org/biocyc/META:MALTOSE-PHOSPHORYLASE-RXN; MetaNetX (MNX) Equation: http://identifiers.org/metanetx.reaction/MNXR101717; KEGG Reaction: http://identifiers.or…	1	0.7	1	0.964286	0.972222	1	0.947368	0.978261	-0.3	-0.278261	0.0277778
R_MS_1	''	h_c + hcys__L_c + mhpglu_c <-> hpglu_c + met__L_c		1	1	1	1	1	1	1	1	0	0	0
R_MTI	'Maltose trehalose isomerase'	tre_c <-> malt_c	RHEA: http://identifiers.org/rhea/15145; RHEA: http://identifiers.org/rhea/15146; RHEA: http://identifiers.org/rhea/15147; RHEA: http://identifiers.org/rhea/15148; EC Number: http://identifiers.org/ec-code/5.4.99.16; BioCyc: http://identifiers.org/biocyc/META:5.4.99.16-RXN; MetaNetX (MNX) Equation: http://identifiers.org/metanetx.reaction/MNXR101757; Reactome Reaction: http://identifiers.org/reac…	1	1	1	1	1	1	1	1	0	0	0
R_NADDPp_1	'NAD diphosphatase, peroxisomal'	h2o_c + nad_c <-> amp_c + nmn_c		1	1	1	1	1	1	1	1	0	0	0
R_NADHPO	'NADH peroxidase'	h_c + h2o2_c + nadh_c <-> 2.0 h2o_c + nad_c	EC Number: http://identifiers.org/ec-code/1.11.1.1; RHEA: http://identifiers.org/rhea/18509; RHEA: http://identifiers.org/rhea/18510; RHEA: http://identifiers.org/rhea/18511; RHEA: http://identifiers.org/rhea/18512; BioCyc: http://identifiers.org/biocyc/META:NADH-PEROXIDASE-RXN; MetaNetX (MNX) Equation: http://identifiers.org/metanetx.reaction/MNXR101879; KEGG Reaction: http://identifiers.org/keg…	1	1	1	1	1	1	1	1	0	0	0
R_NADS1	'NAD synthase (nh3)'	atp_c + dnad_c + nh4_c <-> amp_c + h_c + nad_c + ppi_c	RHEA: http://identifiers.org/rhea/21188; RHEA: http://identifiers.org/rhea/21189; RHEA: http://identifiers.org/rhea/21190; RHEA: http://identifiers.org/rhea/21191; EC Number: http://identifiers.org/ec-code/6.3.1.5; EC Number: http://identifiers.org/ec-code/6.3.5.1; BioCyc: http://identifiers.org/biocyc/META:NAD-SYNTH-NH3-RXN; MetaNetX (MNX) Equation: http://identifiers.org/metanetx.reaction/MNXR1…	1	1	1	1	1	1	1	1	0	0	0
R_NADS2	'Nicotinate-mononucleotide adenylyltransferase'	h2o_c + dnad_c + gln__L_c + atp_c <-> glu__L_c + amp_c + h_c + nad_c + ppi_c	RHEA: http://identifiers.org/rhea/24384; RHEA: http://identifiers.org/rhea/24385; RHEA: http://identifiers.org/rhea/24386; RHEA: http://identifiers.org/rhea/24387; EC Number: http://identifiers.org/ec-code/6.3.5.1; BioCyc: http://identifiers.org/biocyc/META:NAD-SYNTH-GLN-RXN; MetaNetX (MNX) Equation: http://identifiers.org/metanetx.reaction/MNXR97678; Reactome Reaction: http://identifiers.org/rea…	1	1	1	1	1	1	1	1	0	0	0
R_NAPRT	'NAPRTase (rev)'	h_c + nac_c + prpp_c <-> nicrnt_c + ppi_c	RHEA: http://identifiers.org/rhea/13393; RHEA: http://identifiers.org/rhea/13394; RHEA: http://identifiers.org/rhea/13395; RHEA: http://identifiers.org/rhea/13396; EC Number: http://identifiers.org/ec-code/2.4.2.11; MetaNetX (MNX) Equation: http://identifiers.org/metanetx.reaction/MNXR101910; Reactome Reaction: http://identifiers.org/reactome/R-ATH-197186; Reactome Reaction: http://identifiers.or…	1	1	1	1	1	1	1	1	0	0	0
R_NAabc	''	atp_c + h2o_c + na1_e <-> adp_c + h_c + na1_c + pi_c		0.875	0.8	1	1	0.972222	1	1	1	-0.075	-0.2	0.0277778
R_NAabcO	'Sodium transport out via ABC system'	atp_c + h2o_c + na1_c <-> adp_c + h_c + pi_c + na1_e	RHEA: http://identifiers.org/rhea/14633#1; RHEA: http://identifiers.org/rhea/14634#1; RHEA: http://identifiers.org/rhea/14635#1; RHEA: http://identifiers.org/rhea/14636#1; EC Number: http://identifiers.org/ec-code/3.6.3.15; EC Number: http://identifiers.org/ec-code/3.6.3.7; BioCyc: http://identifiers.org/biocyc/META:3.6.3.15-RXN; BioCyc: http://identifiers.org/biocyc/META:3.6.3.7-RXN; MetaNetX (M…	1	1	1	1	1	1	1	1	0	0	0
R_NAt6	''	h_e + na1_e <-> h_c + na1_c		1	1	1	1	1	1	1	1	0	0	0
R_NH3c	'Ammomnium proton dissociation'	h_c + nh3_c <-> nh4_c	BioCyc: http://identifiers.org/biocyc/META:RXN-11811; MetaNetX (MNX) Equation: http://identifiers.org/metanetx.reaction/MNXR101948	1	1	1	1	1	1	0.947368	0.98913	0	0.0108696	0
R_NH4tex	'Ammonia transport via diffusion (extracellular to periplasm)'	nh4_e <-> nh4_p	RHEA: http://identifiers.org/rhea/28747; RHEA: http://identifiers.org/rhea/28748; RHEA: http://identifiers.org/rhea/28749; RHEA: http://identifiers.org/rhea/28750; BioCyc: http://identifiers.org/biocyc/META:RXN-9615; BioCyc: http://identifiers.org/biocyc/META:TRANS-RXN0-206; BioCyc: http://identifiers.org/biocyc/META:TRANS-RXN0-544; MetaNetX (MNX) Equation: http://identifiers.org/metanetx.reactio…	1	1	1	1	1	1	1	1	0	0	0
R_NH4tpp	'Ammonia reversible transport (periplasm)'	nh4_p <-> nh4_c	RHEA: http://identifiers.org/rhea/28747; RHEA: http://identifiers.org/rhea/28748; RHEA: http://identifiers.org/rhea/28749; RHEA: http://identifiers.org/rhea/28750; BioCyc: http://identifiers.org/biocyc/META:RXN-9615; BioCyc: http://identifiers.org/biocyc/META:TRANS-RXN0-206; BioCyc: http://identifiers.org/biocyc/META:TRANS-RXN0-544; MetaNetX (MNX) Equation: http://identifiers.org/metanetx.reactio…	1	1	1	1	1	1	1	1	0	0	0
R_NIabc	'Nickel transport via ABC system'	atp_c + h2o_c + ni2_e <-> adp_c + h_c + ni2_c + pi_c	RHEA: http://identifiers.org/rhea/15557#1; RHEA: http://identifiers.org/rhea/15558#1; RHEA: http://identifiers.org/rhea/15559#1; RHEA: http://identifiers.org/rhea/15560#1; EC Number: http://identifiers.org/ec-code/3.6.3.24; BioCyc: http://identifiers.org/biocyc/META:3.6.3.24-RXN; BioCyc: http://identifiers.org/biocyc/META:ABC-20-RXN; MetaNetX (MNX) Equation: http://identifiers.org/metanetx.reacti…	1	0.8	0.666667	0.964286	0.972222	0.955556	0.842105	0.934783	-0.2	-0.134783	-0.305556
R_NMNAT	'Nicotinamide-nucleotide adenylyltransferase'	atp_c + h_c + nmn_c <-> nad_c + ppi_c	EC Number: http://identifiers.org/ec-code/2.7.7.1; EC Number: http://identifiers.org/ec-code/2.7.7.18; RHEA: http://identifiers.org/rhea/21360; RHEA: http://identifiers.org/rhea/21361; RHEA: http://identifiers.org/rhea/21362; RHEA: http://identifiers.org/rhea/21363; BioCyc: http://identifiers.org/biocyc/META:2.7.7.1-RXN; MetaNetX (MNX) Equation: http://identifiers.org/metanetx.reaction/MNXR95841;…	0.875	0.7	0.5	1	0.972222	1	1	1	-0.175	-0.3	-0.472222
R_NMNHYD_1	'Nicotinamide ribonucleotide phosphohydrolase'	h2o_c + nmn_c <-> h_c + pi_c + rnam_c		1	1	1	1	1	1	1	1	0	0	0
R_NNATr	'Nicotinate-nucleotide adenylyltransferase'	atp_c + h_c + nicrnt_c <-> dnad_c + ppi_c	EC Number: http://identifiers.org/ec-code/2.7.7.1; EC Number: http://identifiers.org/ec-code/2.7.7.18; RHEA: http://identifiers.org/rhea/22860; RHEA: http://identifiers.org/rhea/22861; RHEA: http://identifiers.org/rhea/22862; RHEA: http://identifiers.org/rhea/22863; BioCyc: http://identifiers.org/biocyc/META:NICONUCADENYLYLTRAN-RXN; MetaNetX (MNX) Equation: http://identifiers.org/metanetx.reactio…	1	1	1	1	1	1	1	1	0	0	0
R_NO3abc	''	atp_c + h2o_c + no3_e <-> adp_c + h_c + no3_c + pi_c		1	1	1	0.964286	0.972222	1	1	0.98913	0	0.0108696	0.0277778
R_NOX	'NADH oxidase'	h_c + nadh_c + o2_c <-> h2o2_c + nad_c	EC Number: http://identifiers.org/ec-code/1.6.3.1; EC Number: http://identifiers.org/ec-code/1.6.3.3; RHEA: http://identifiers.org/rhea/11264; RHEA: http://identifiers.org/rhea/11265; RHEA: http://identifiers.org/rhea/11266; RHEA: http://identifiers.org/rhea/11267; BioCyc: http://identifiers.org/biocyc/META:RXN-14691; MetaNetX (MNX) Equation: http://identifiers.org/metanetx.reaction/MNXR102010; K…	1	1	1	1	1	1	1	1	0	0	0
R_NP1_1	'Nucleotide phosphatase'	nicrns_c + pi_c <-> nac_c + r1p_c		1	1	1	1	1	1	1	1	0	0	0
R_NTD1	'5''-nucleotidase (dUMP)'	dump_c + h2o_c <-> duri_c + pi_c	RHEA: http://identifiers.org/rhea/29355; RHEA: http://identifiers.org/rhea/29356; RHEA: http://identifiers.org/rhea/29357; RHEA: http://identifiers.org/rhea/29358; EC Number: http://identifiers.org/ec-code/3.1.3.5; EC Number: http://identifiers.org/ec-code/3.1.3.89; BioCyc: http://identifiers.org/biocyc/META:RXN-14143; MetaNetX (MNX) Equation: http://identifiers.org/metanetx.reaction/MNXR102028; …	0.375	0.5	0.5	0.107143	0.166667	0.0888889	0.105263	0.0978261	0.125	0.402174	0.333333
R_NTD10	'5''-nucleotidase (XMP)'	h2o_c + xmp_c <-> pi_c + xtsn_c	RHEA: http://identifiers.org/rhea/28530; RHEA: http://identifiers.org/rhea/28531; RHEA: http://identifiers.org/rhea/28532; RHEA: http://identifiers.org/rhea/28533; EC Number: http://identifiers.org/ec-code/3.1.3.5; BioCyc: http://identifiers.org/biocyc/META:XMPXAN-RXN; MetaNetX (MNX) Equation: http://identifiers.org/metanetx.reaction/MNXR102029; KEGG Reaction: http://identifiers.org/kegg.reaction…	1	1	1	1	1	1	1	1	0	0	0
R_NTD1_1	'5''-nucleotidase (dUMP)'	dump_c + h2o_c <-> duri_c + h_c + pi_c		1	1	1	1	1	1	1	1	0	0	0
R_NTD2	'5''-nucleotidase (UMP)'	h2o_c + ump_c <-> pi_c + uri_c	RHEA: http://identifiers.org/rhea/29359; RHEA: http://identifiers.org/rhea/29360; RHEA: http://identifiers.org/rhea/29361; RHEA: http://identifiers.org/rhea/29362; EC Number: http://identifiers.org/ec-code/3.1.3.5; BioCyc: http://identifiers.org/biocyc/META:RXN-14025; MetaNetX (MNX) Equation: http://identifiers.org/metanetx.reaction/MNXR102032; KEGG Reaction: http://identifiers.org/kegg.reaction/…	0.375	0.5	0.5	0.107143	0.166667	0.133333	0.105263	0.119565	0.125	0.380435	0.333333
R_NTD3	'5''-nucleotidase (dCMP)'	dcmp_c + h2o_c <-> dcyt_c + pi_c	RHEA: http://identifiers.org/rhea/29363; RHEA: http://identifiers.org/rhea/29364; RHEA: http://identifiers.org/rhea/29365; RHEA: http://identifiers.org/rhea/29366; EC Number: http://identifiers.org/ec-code/3.1.3.5; EC Number: http://identifiers.org/ec-code/3.1.3.89; BioCyc: http://identifiers.org/biocyc/META:RXN0-5292; MetaNetX (MNX) Equation: http://identifiers.org/metanetx.reaction/MNXR102033; …	0.625	0.6	0.666667	0.392857	0.444444	0.4	0.421053	0.402174	-0.025	0.197826	0.222222
R_NTD4	'5''-nucleotidase (CMP)'	cmp_c + h2o_c <-> cytd_c + pi_c	RHEA: http://identifiers.org/rhea/29367; RHEA: http://identifiers.org/rhea/29368; RHEA: http://identifiers.org/rhea/29369; RHEA: http://identifiers.org/rhea/29370; EC Number: http://identifiers.org/ec-code/3.1.3.5; EC Number: http://identifiers.org/ec-code/3.1.3.91; BioCyc: http://identifiers.org/biocyc/META:RXN-14026; MetaNetX (MNX) Equation: http://identifiers.org/metanetx.reaction/MNXR102034; …	0.375	0.5	0.5	0.107143	0.166667	0.0888889	0.105263	0.0978261	0.125	0.402174	0.333333
R_NTD5	'5''-nucleotidase (dTMP)'	dtmp_c + h2o_c <-> pi_c + thymd_c	RHEA: http://identifiers.org/rhea/11080; RHEA: http://identifiers.org/rhea/11081; RHEA: http://identifiers.org/rhea/11082; RHEA: http://identifiers.org/rhea/11083; EC Number: http://identifiers.org/ec-code/3.1.3.35; EC Number: http://identifiers.org/ec-code/3.1.3.5; EC Number: http://identifiers.org/ec-code/3.1.3.89; BioCyc: http://identifiers.org/biocyc/META:THYMIDYLATE-5-PHOSPHATASE-RXN; MetaNe…	0.625	0.5	0.5	0.321429	0.388889	0.222222	0.315789	0.271739	-0.125	0.228261	0.111111
R_NTD6	'5''-nucleotidase (dAMP)'	damp_c + h2o_c <-> dad_2_c + pi_c	RHEA: http://identifiers.org/rhea/29371; RHEA: http://identifiers.org/rhea/29372; RHEA: http://identifiers.org/rhea/29373; RHEA: http://identifiers.org/rhea/29374; EC Number: http://identifiers.org/ec-code/3.1.3.5; EC Number: http://identifiers.org/ec-code/3.1.3.89; BioCyc: http://identifiers.org/biocyc/META:RXN-14161; MetaNetX (MNX) Equation: http://identifiers.org/metanetx.reaction/MNXR102036; …	1	1	1	1	1	1	1	1	0	0	0
R_NTD7	'5''-nucleotidase (AMP)'	amp_c + h2o_c <-> adn_c + pi_c	RHEA: http://identifiers.org/rhea/29375; RHEA: http://identifiers.org/rhea/29376; RHEA: http://identifiers.org/rhea/29377; RHEA: http://identifiers.org/rhea/29378; EC Number: http://identifiers.org/ec-code/3.1.3.5; BioCyc: http://identifiers.org/biocyc/META:AMP-DEPHOSPHORYLATION-RXN; MetaNetX (MNX) Equation: http://identifiers.org/metanetx.reaction/MNXR102037; Reactome Reaction: http://identifier…	1	1	1	1	1	1	1	1	0	0	0
R_NTD8	'5''-nucleotidase (dGMP)'	dgmp_c + h2o_c <-> dgsn_c + pi_c	RHEA: http://identifiers.org/rhea/29379; RHEA: http://identifiers.org/rhea/29380; RHEA: http://identifiers.org/rhea/29381; RHEA: http://identifiers.org/rhea/29382; EC Number: http://identifiers.org/ec-code/3.1.3.5; EC Number: http://identifiers.org/ec-code/3.1.3.89; BioCyc: http://identifiers.org/biocyc/META:RXN-14142; MetaNetX (MNX) Equation: http://identifiers.org/metanetx.reaction/MNXR102038; …	1	1	1	1	1	1	1	1	0	0	0
R_NTD9	'5''-nucleotidase (GMP)'	gmp_c + h2o_c <-> gsn_c + pi_c	RHEA: http://identifiers.org/rhea/27714; RHEA: http://identifiers.org/rhea/27715; RHEA: http://identifiers.org/rhea/27716; RHEA: http://identifiers.org/rhea/27717; EC Number: http://identifiers.org/ec-code/3.1.3.5; BioCyc: http://identifiers.org/biocyc/META:RXN-7609; MetaNetX (MNX) Equation: http://identifiers.org/metanetx.reaction/MNXR100381; KEGG Reaction: http://identifiers.org/kegg.reaction/R…	1	1	1	1	1	1	1	1	0	0	0
R_NTP1	'Nucleoside-triphosphatase (ATP)'	atp_c + h2o_c <-> adp_c + h_c + pi_c	RHEA: http://identifiers.org/rhea/13065; RHEA: http://identifiers.org/rhea/13066; RHEA: http://identifiers.org/rhea/13067; RHEA: http://identifiers.org/rhea/13068; EC Number: http://identifiers.org/ec-code/3.6.1.15; EC Number: http://identifiers.org/ec-code/3.6.1.3; EC Number: http://identifiers.org/ec-code/3.6.1.5; EC Number: http://identifiers.org/ec-code/3.6.1.8; EC Number: http://identifiers.…	1	1	1	1	1	1	1	1	0	0	0
R_NTP3	'Nucleoside-triphosphatase (GTP)'	gtp_c + h2o_c <-> gdp_c + h_c + pi_c	RHEA: http://identifiers.org/rhea/19669; RHEA: http://identifiers.org/rhea/19670; RHEA: http://identifiers.org/rhea/19671; RHEA: http://identifiers.org/rhea/19672; EC Number: http://identifiers.org/ec-code/3.6.1.15; EC Number: http://identifiers.org/ec-code/3.6.1.5; EC Number: http://identifiers.org/ec-code/3.6.5.1; EC Number: http://identifiers.org/ec-code/3.6.5.2; EC Number: http://identifiers.…	1	1	1	1	1	1	1	1	0	0	0
R_O2tex	'Oxygen transport via diffusion (extracellular to periplasm)'	o2_e <-> o2_p	BioCyc: http://identifiers.org/biocyc/META:TRANS-RXN0-474; MetaNetX (MNX) Equation: http://identifiers.org/metanetx.reaction/MNXR102090; SEED Reaction: http://identifiers.org/seed.reaction/rxn05468; SEED Reaction: http://identifiers.org/seed.reaction/rxn09031; SEED Reaction: http://identifiers.org/seed.reaction/rxn09032; SEED Reaction: http://identifiers.org/seed.reaction/rxn09641; SEED Reaction:…	1	1	1	1	1	1	1	1	0	0	0
R_O2tpp	'O2 transport via diffusion (periplasm)'	o2_p <-> o2_c	BioCyc: http://identifiers.org/biocyc/META:TRANS-RXN0-474; MetaNetX (MNX) Equation: http://identifiers.org/metanetx.reaction/MNXR102090; SEED Reaction: http://identifiers.org/seed.reaction/rxn05468; SEED Reaction: http://identifiers.org/seed.reaction/rxn09031; SEED Reaction: http://identifiers.org/seed.reaction/rxn09032; SEED Reaction: http://identifiers.org/seed.reaction/rxn09641; SEED Reaction:…	1	1	1	1	1	1	1	1	0	0	0
R_OBDHc	'2-Oxobutanoate dehydrogenase, cytosolic'	2obut_c + coa_c + nad_c <-> ppcoa_c + co2_c + nadh_c	RHEA: http://identifiers.org/rhea/33223; RHEA: http://identifiers.org/rhea/33224; RHEA: http://identifiers.org/rhea/33225; RHEA: http://identifiers.org/rhea/33226; BioCyc: http://identifiers.org/biocyc/META:RXN-7790; MetaNetX (MNX) Equation: http://identifiers.org/metanetx.reaction/MNXR102133; SEED Reaction: http://identifiers.org/seed.reaction/rxn12777	1	1	1	0.964286	0.972222	0.977778	1	0.978261	0	0.0217391	0.0277778
R_OIVD1r	'2-oxoisovalerate dehydrogenase (acylating; 4-methyl-2-oxopentaoate)'	4mop_c + coa_c + nad_c <-> co2_c + ivcoa_c + nadh_c	EC Number: http://identifiers.org/ec-code/1.2.1; EC Number: http://identifiers.org/ec-code/1.2.1.25; RHEA: http://identifiers.org/rhea/25177; RHEA: http://identifiers.org/rhea/25178; RHEA: http://identifiers.org/rhea/25179; RHEA: http://identifiers.org/rhea/25180; BioCyc: http://identifiers.org/biocyc/META:2KETO-4METHYL-PENTANOATE-DEHYDROG-RXN; MetaNetX (MNX) Equation: http://identifiers.org/meta…	1	1	1	1	1	1	1	1	0	0	0
R_OIVD2	'2-oxoisovalerate dehydrogenase (acylating; 3-methyl-2-oxobutanoate)'	3mob_c + coa_c + nad_c <-> co2_c + ibcoa_c + nadh_c	EC Number: http://identifiers.org/ec-code/1.2.1.25; RHEA: http://identifiers.org/rhea/13997; RHEA: http://identifiers.org/rhea/13998; RHEA: http://identifiers.org/rhea/13999; RHEA: http://identifiers.org/rhea/14000; BioCyc: http://identifiers.org/biocyc/META:1.2.1.25-RXN; MetaNetX (MNX) Equation: http://identifiers.org/metanetx.reaction/MNXR102173; KEGG Reaction: http://identifiers.org/kegg.react…	1	1	1	0.928571	0.944444	0.977778	1	0.967391	0	0.0326087	0.0555556
R_OIVD3	'2-oxoisovalerate dehydrogenase (acylating; 3-methyl-2-oxopentanoate)'	3mop_c + coa_c + nad_c <-> 2mbcoa_c + co2_c + nadh_c	EC Number: http://identifiers.org/ec-code/1.2.1; EC Number: http://identifiers.org/ec-code/1.2.1.25; RHEA: http://identifiers.org/rhea/30907; RHEA: http://identifiers.org/rhea/30908; RHEA: http://identifiers.org/rhea/30909; RHEA: http://identifiers.org/rhea/30910; BioCyc: http://identifiers.org/biocyc/META:2KETO-3METHYLVALERATE-RXN; MetaNetX (MNX) Equation: http://identifiers.org/metanetx.reactio…	1	1	1	1	1	1	1	1	0	0	0
R_ORNabcpp	'Ornithine transport via ABC system (periplasm)'	atp_c + h2o_c + orn_p <-> adp_c + h_c + orn_c + pi_c	RHEA: http://identifiers.org/rhea/29883#1; RHEA: http://identifiers.org/rhea/29884#1; RHEA: http://identifiers.org/rhea/29885#1; RHEA: http://identifiers.org/rhea/29886#1; EC Number: http://identifiers.org/ec-code/3.6.3.21; BioCyc: http://identifiers.org/biocyc/META:ABC-37-RXN; MetaNetX (MNX) Equation: http://identifiers.org/metanetx.reaction/MNXR102222; SEED Reaction: http://identifiers.org/seed…	1	0.7	0.666667	0.964286	0.972222	1	1	0.98913	-0.3	-0.28913	-0.305556
R_PA141abcpp	'Phosphatidate transport via ABC system (n-C14:1, periplasm)'	atp_c + h2o_c + pa141_c <-> adp_c + h_c + pi_c + pa141_p	MetaNetX (MNX) Equation: http://identifiers.org/metanetx.reaction/MNXR102306; SEED Reaction: http://identifiers.org/seed.reaction/rxn09055	0.875	0.8	0.833333	1	0.972222	0.933333	1	0.967391	-0.075	-0.167391	-0.138889
R_PA161abcpp	'Phosphatidate transport via ABC system (n-C16:1, periplasm)'	atp_c + h2o_c + pa161_c <-> adp_c + h_c + pi_c + pa161_p	MetaNetX (MNX) Equation: http://identifiers.org/metanetx.reaction/MNXR102308; SEED Reaction: http://identifiers.org/seed.reaction/rxn09057	1	0.9	0.833333	0.928571	0.944444	0.977778	0.947368	0.956522	-0.1	-0.0565217	-0.111111
R_PA180abcpp	'Phosphatidate transport via ABC system (n-C18:0, periplasm)'	atp_c + h2o_c + pa180_c <-> adp_c + h_c + pi_c + pa180_p	MetaNetX (MNX) Equation: http://identifiers.org/metanetx.reaction/MNXR102309; SEED Reaction: http://identifiers.org/seed.reaction/rxn09058	1	0.9	0.833333	1	1	1	1	1	-0.1	-0.1	-0.166667
R_PAPSR	'Phosphoadenylyl-sulfate reductase (thioredoxin)'	paps_c + trdrd_c <-> 2.0 h_c + pap_c + so3_c + trdox_c	EC Number: http://identifiers.org/ec-code/1.8.4.8; BioCyc: http://identifiers.org/biocyc/META:1.8.4.8-RXN; MetaNetX (MNX) Equation: http://identifiers.org/metanetx.reaction/MNXR102376; KEGG Reaction: http://identifiers.org/kegg.reaction/R02021; SEED Reaction: http://identifiers.org/seed.reaction/rxn05239	1	0.9	0.833333	0.892857	0.916667	0.844444	0.789474	0.847826	-0.1	0.0521739	-0.0833333
R_PBUTT	'Phosphate butyryltransferase'	btcoa_c + pi_c <-> butpi_c + coa_c	EC Number: http://identifiers.org/ec-code/2.3.1.19; RHEA: http://identifiers.org/rhea/20892; RHEA: http://identifiers.org/rhea/20893; RHEA: http://identifiers.org/rhea/20894; RHEA: http://identifiers.org/rhea/20895; BioCyc: http://identifiers.org/biocyc/META:PHOSPHATE-BUTYRYLTRANSFERASE-RXN; MetaNetX (MNX) Equation: http://identifiers.org/metanetx.reaction/MNXR102390; KEGG Reaction: http://identi…	0.875	0.8	1	1	0.972222	0.933333	0.947368	0.956522	-0.075	-0.156522	0.0277778
R_PDH	'Pyruvate dehydrogenase'	coa_c + nad_c + pyr_c <-> accoa_c + co2_c + nadh_c	EC Number: http://identifiers.org/ec-code/1.2.1; EC Number: http://identifiers.org/ec-code/1.2.1.51; EC Number: http://identifiers.org/ec-code/1.2.4.1; EC Number: http://identifiers.org/ec-code/1.8.1.4; EC Number: http://identifiers.org/ec-code/2.3.1.12; RHEA: http://identifiers.org/rhea/28042; RHEA: http://identifiers.org/rhea/28043; RHEA: http://identifiers.org/rhea/28044; RHEA: http://identifi…	1	1	1	1	1	1	1	1	0	0	0
R_PDHbr	'Pyruvate dehydrogenase (dihydrolipoamide) reversible'	coa_c + adhlam_c <-> dhlam_c + accoa_c	EC Number: http://identifiers.org/ec-code/2.3.1.12; EC Number: http://identifiers.org/ec-code/2.3.1.168; BioCyc: http://identifiers.org/biocyc/META:DIHYDLIPACETRANS-RXN; MetaNetX (MNX) Equation: http://identifiers.org/metanetx.reaction/MNXR102430; SEED Reaction: http://identifiers.org/seed.reaction/rxn01871	1	1	1	1	1	1	1	1	0	0	0
R_PDHcr	'Pyruvate dehydrogenase (dihydrolipoamide dehydrogenase) reversible'	dhlam_c + nad_c <-> h_c + lpam_c + nadh_c	EC Number: http://identifiers.org/ec-code/1.8.1; EC Number: http://identifiers.org/ec-code/1.8.1.4; RHEA: http://identifiers.org/rhea/33059; RHEA: http://identifiers.org/rhea/33060; RHEA: http://identifiers.org/rhea/33061; RHEA: http://identifiers.org/rhea/33062; BioCyc: http://identifiers.org/biocyc/META:RXN-18331; MetaNetX (MNX) Equation: http://identifiers.org/metanetx.reaction/MNXR100066; KEG…	1	1	1	1	1	1	1	1	0	0	0
R_PDXPP	'Pyridoxine 5-phosphate phosphatase'	h2o_c + pdx5p_c <-> pi_c + pydxn_c	RHEA: http://identifiers.org/rhea/25112; RHEA: http://identifiers.org/rhea/25113; RHEA: http://identifiers.org/rhea/25114; RHEA: http://identifiers.org/rhea/25115; EC Number: http://identifiers.org/ec-code/3.1.3.74; BioCyc: http://identifiers.org/biocyc/META:RXN-14181; MetaNetX (MNX) Equation: http://identifiers.org/metanetx.reaction/MNXR102440; KEGG Reaction: http://identifiers.org/kegg.reaction…	0.875	1	1	1	0.972222	0.977778	0.947368	0.978261	0.125	0.0217391	0.0277778
R_PE160abcpp	'Phosphatidylethanolamine transport via ABC system (n-C16:0, periplasm)'	atp_c + h2o_c + pe160_c <-> adp_c + h_c + pi_c + pe160_p	MetaNetX (MNX) Equation: http://identifiers.org/metanetx.reaction/MNXR102444; SEED Reaction: http://identifiers.org/seed.reaction/rxn09076	0.875	0.8	0.666667	0.785714	0.805556	0.733333	0.789474	0.76087	-0.075	0.0391304	-0.138889
R_PE180abcpp	'Phosphatidylethanolamine transport via ABC system (n-C18:0, periplasm)'	atp_c + h2o_c + pe180_c <-> adp_c + h_c + pi_c + pe180_p	MetaNetX (MNX) Equation: http://identifiers.org/metanetx.reaction/MNXR102450; SEED Reaction: http://identifiers.org/seed.reaction/rxn09078	1	1	1	1	1	0.977778	1	0.98913	0	0.0108696	0
R_PFK	'Phosphofructokinase'	atp_c + f6p_c <-> adp_c + fdp_c + h_c	RHEA: http://identifiers.org/rhea/16109; RHEA: http://identifiers.org/rhea/16110; RHEA: http://identifiers.org/rhea/16111; RHEA: http://identifiers.org/rhea/16112; EC Number: http://identifiers.org/ec-code/2.7.1.11; MetaNetX (MNX) Equation: http://identifiers.org/metanetx.reaction/MNXR102507	1	1	1	1	1	1	1	1	0	0	0
R_PFK_2	'Phosphofructokinase'	atp_c + tag6p__D_c <-> adp_c + h_c + tagdp__D_c	RHEA: http://identifiers.org/rhea/12420; RHEA: http://identifiers.org/rhea/12421; RHEA: http://identifiers.org/rhea/12422; RHEA: http://identifiers.org/rhea/12423; EC Number: http://identifiers.org/ec-code/2.7.1.11; EC Number: http://identifiers.org/ec-code/2.7.1.144; EC Number: http://identifiers.org/ec-code/2.7.1.56; BioCyc: http://identifiers.org/biocyc/META:TAGAKIN-RXN; MetaNetX (MNX) Equatio…	1	1	1	1	1	1	1	1	0	0	0
R_PFK_3	'Phosphofructokinase (s7p)'	atp_c + s7p_c <-> adp_c + h_c + s17bp_c	EC Number: http://identifiers.org/ec-code/2.7.1; EC Number: http://identifiers.org/ec-code/2.7.1.11; RHEA: http://identifiers.org/rhea/31443; RHEA: http://identifiers.org/rhea/31444; RHEA: http://identifiers.org/rhea/31445; RHEA: http://identifiers.org/rhea/31446; BioCyc: http://identifiers.org/biocyc/META:RXN0-6541; MetaNetX (MNX) Equation: http://identifiers.org/metanetx.reaction/MNXR102510; KE…	1	1	1	1	1	1	1	1	0	0	0
R_PG120abcpp	'Phosphatidylglycerol transport via ABC system (n-C12:0, periplasm)'	atp_c + h2o_c + pg120_c <-> adp_c + h_c + pi_c + pg120_p	MetaNetX (MNX) Equation: http://identifiers.org/metanetx.reaction/MNXR102516	1	0.8	0.666667	0.928571	0.944444	0.933333	1	0.945652	-0.2	-0.145652	-0.277778
R_PG140abcpp	'Phosphatidylglycerol transport via ABC system (n-C14:0, periplasm)'	atp_c + h2o_c + pg140_c <-> adp_c + h_c + pi_c + pg140_p	MetaNetX (MNX) Equation: http://identifiers.org/metanetx.reaction/MNXR102517	1	0.4	0.166667	0.857143	0.888889	0.977778	0.894737	0.923913	-0.6	-0.523913	-0.722222
R_PG141abcpp	'Phosphatidylglycerol transport via ABC system (n-C14:1, periplasm)'	atp_c + h2o_c + pg141_c <-> adp_c + h_c + pi_c + pg141_p	MetaNetX (MNX) Equation: http://identifiers.org/metanetx.reaction/MNXR102518	1	1	1	1	1	1	1	1	0	0	0
R_PG161abcpp	'Phosphatidylglycerol transport via ABC system (n-C16:1, periplasm)'	atp_c + h2o_c + pg161_c <-> adp_c + h_c + pi_c + pg161_p	MetaNetX (MNX) Equation: http://identifiers.org/metanetx.reaction/MNXR102520; SEED Reaction: http://identifiers.org/seed.reaction/rxn09089	1	0.9	1	1	1	0.977778	0.947368	0.978261	-0.1	-0.0782609	0
R_PG180abcpp	'Phosphatidylglycerol transport via ABC system (n-C18:0, periplasm)'	atp_c + h2o_c + pg180_c <-> adp_c + h_c + pi_c + pg180_p	MetaNetX (MNX) Equation: http://identifiers.org/metanetx.reaction/MNXR102521; SEED Reaction: http://identifiers.org/seed.reaction/rxn09090	1	1	1	0.964286	0.972222	0.977778	1	0.978261	0	0.0217391	0.0277778
R_PG181abcpp	'Phosphatidylglycerol transport via ABC system (n-C18:1, periplasm)'	atp_c + h2o_c + pg181_c <-> adp_c + h_c + pi_c + pg181_p	MetaNetX (MNX) Equation: http://identifiers.org/metanetx.reaction/MNXR102524	1	0.8	0.833333	0.964286	0.972222	0.866667	0.894737	0.902174	-0.2	-0.102174	-0.138889
R_PGI	'Glucose-6-phosphate isomerase'	g6p_c <-> f6p_c	EC Number: http://identifiers.org/ec-code/5.3.1.9; BioCyc: http://identifiers.org/biocyc/META:PGLUCISOM-RXN; MetaNetX (MNX) Equation: http://identifiers.org/metanetx.reaction/MNXR102535	1	1	1	1	1	1	1	1	0	0	0
R_PGI1c	'Glucose-6-phosphateisomerase,glycosome'	g6p_A_c <-> f6p_c		1	1	1	1	1	1	1	1	0	0	0
R_PGK	'Phosphoglycerate kinase'	3pg_c + atp_c <-> 13dpg_c + adp_c	RHEA: http://identifiers.org/rhea/14801; RHEA: http://identifiers.org/rhea/14802; RHEA: http://identifiers.org/rhea/14803; RHEA: http://identifiers.org/rhea/14804; EC Number: http://identifiers.org/ec-code/2.7.2.3; BioCyc: http://identifiers.org/biocyc/META:PHOSGLYPHOS-RXN; MetaNetX (MNX) Equation: http://identifiers.org/metanetx.reaction/MNXR102538; Reactome Reaction: http://identifiers.org/reac…	1	1	1	1	1	1	1	1	0	0	0
R_PGM	'Phosphoglycerate mutase'	2pg_c <-> 3pg_c	RHEA: http://identifiers.org/rhea/15901; RHEA: http://identifiers.org/rhea/15902; RHEA: http://identifiers.org/rhea/15903; RHEA: http://identifiers.org/rhea/15904; EC Number: http://identifiers.org/ec-code/5.4.2.1; EC Number: http://identifiers.org/ec-code/5.4.2.11; EC Number: http://identifiers.org/ec-code/5.4.2.12; BioCyc: http://identifiers.org/biocyc/META:3PGAREARR-RXN; BioCyc: http://identif…	1	1	1	1	1	1	1	1	0	0	0
R_PGMT	'Phosphoglucomutase'	g1p_c <-> g6p_c	EC Number: http://identifiers.org/ec-code/5.4.2.2; EC Number: http://identifiers.org/ec-code/5.4.2.5; EC Number: http://identifiers.org/ec-code/5.4.2.8; BioCyc: http://identifiers.org/biocyc/META:PHOSPHOGLUCMUT-RXN; BioCyc: http://identifiers.org/biocyc/META:RXN-16999; MetaNetX (MNX) Equation: http://identifiers.org/metanetx.reaction/MNXR102548; KEGG Reaction: http://identifiers.org/kegg.reaction…	1	1	1	1	1	1	1	1	0	0	0
R_PGMT_2	''	g1p_B_c <-> g6p_c		1	0.7	1	0.964286	0.972222	1	0.947368	0.978261	-0.3	-0.278261	0.0277778
R_PGP160abcpp	'Phosphatidylglycerophosphate transport via ABC system (n-C16:0, periplasm)'	atp_c + h2o_c + pgp160_c <-> adp_c + h_c + pi_c + pgp160_p	MetaNetX (MNX) Equation: http://identifiers.org/metanetx.reaction/MNXR102553; SEED Reaction: http://identifiers.org/seed.reaction/rxn09097	0.25	0.1	0	0.107143	0.138889	0.111111	0	0.0869565	-0.15	0.0130435	-0.138889
R_PGSA120	'Phosphatidylglycerol synthase (n-C12:0)'	cdpdddecg_c + glyc3p_c <-> cmp_c + h_c + pgp120_c	EC Number: http://identifiers.org/ec-code/2.7.8.5; MetaNetX (MNX) Equation: http://identifiers.org/metanetx.reaction/MNXR102589	0.5	0.3	0	0.142857	0.222222	0.133333	0.105263	0.130435	-0.2	0.169565	-0.222222
R_PGSA140	'Phosphatidylglycerol synthase (n-C14:0)'	cdpdtdecg_c + glyc3p_c <-> cmp_c + h_c + pgp140_c	MetaNetX (MNX) Equation: http://identifiers.org/metanetx.reaction/MNXR102590	0.625	0.1	0	0.142857	0.25	0.133333	0.157895	0.141304	-0.525	-0.0413043	-0.25
R_PGSA160	'Phosphatidylglycerol synthase (n-C16:0)'	cdpdhdecg_c + glyc3p_c <-> cmp_c + h_c + pgp160_c	EC Number: http://identifiers.org/ec-code/2.7.8.5; MetaNetX (MNX) Equation: http://identifiers.org/metanetx.reaction/MNXR102592; SEED Reaction: http://identifiers.org/seed.reaction/rxn09111	0.875	1	1	1	0.972222	0.911111	1	0.956522	0.125	0.0434783	0.0277778
R_PGSA161	'Phosphatidylglycerol synthase (n-C16:1)'	cdpdhdec9eg_c + glyc3p_c <-> cmp_c + h_c + pgp161_c	EC Number: http://identifiers.org/ec-code/2.7.8.5; MetaNetX (MNX) Equation: http://identifiers.org/metanetx.reaction/MNXR102594; SEED Reaction: http://identifiers.org/seed.reaction/rxn09112	1	1	1	1	1	1	1	1	0	0	0
R_PGSA180	'Phosphatidylglycerol synthase (n-C18:0)'	cdpdodecg_c + glyc3p_c <-> cmp_c + h_c + pgp180_c	EC Number: http://identifiers.org/ec-code/2.7.8.5; MetaNetX (MNX) Equation: http://identifiers.org/metanetx.reaction/MNXR102595; SEED Reaction: http://identifiers.org/seed.reaction/rxn09113	1	1	1	0.964286	0.972222	1	1	0.98913	0	0.0108696	0.0277778
R_PGSA181	'Phosphatidylglycerol synthase (n-C18:1)'	cdpdodec11eg_c + glyc3p_c <-> cmp_c + h_c + pgp181_c	EC Number: http://identifiers.org/ec-code/2.7.8.5; MetaNetX (MNX) Equation: http://identifiers.org/metanetx.reaction/MNXR102596	0.5	0.3	0.166667	0.0714286	0.166667	0.0888889	0.105263	0.0869565	-0.2	0.213043	0
R_PHEabc	''	atp_c + h2o_c + phe__L_e <-> adp_c + h_c + phe__L_c + pi_c		1	1	1	1	1	1	1	1	0	0	0
R_PIabc	'Phosphate transport via ABC system'	atp_c + h2o_c + pi_e <-> adp_c + h_c + 2.0 pi_c	RHEA: http://identifiers.org/rhea/24440#1; RHEA: http://identifiers.org/rhea/24441#1; RHEA: http://identifiers.org/rhea/24442#1; RHEA: http://identifiers.org/rhea/24443#1; EC Number: http://identifiers.org/ec-code/3.6.3.27; BioCyc: http://identifiers.org/biocyc/META:ABC-27-RXN; MetaNetX (MNX) Equation: http://identifiers.org/metanetx.reaction/MNXR102870; SEED Reaction: http://identifiers.org/seed…	0.5	0.7	0.666667	0	0.111111	0	0	0	0.2	0.7	0.555556
R_PNP	'Purine nucleoside phosphorylase'	pi_c + rnam_c <-> h_c + ncam_c + r1p_c	EC Number: http://identifiers.org/ec-code/2.4.2; EC Number: http://identifiers.org/ec-code/2.4.2.1; BioCyc: http://identifiers.org/biocyc/META:RXN0-7092; MetaNetX (MNX) Equation: http://identifiers.org/metanetx.reaction/MNXR103048; KEGG Reaction: http://identifiers.org/kegg.reaction/R02294; SEED Reaction: http://identifiers.org/seed.reaction/rxn01646	0.75	1	1	1	0.944444	1	1	1	0.25	0	0.0555556
R_PNP_1	'Purine-nucleoside phosphorylase'	pi_c + rnam_c <-> ncam_c + r1p_c		1	1	1	1	1	1	1	1	0	0	0
R_PPA	'Inorganic diphosphatase'	h2o_c + ppi_c <-> h_c + 2.0 pi_c	RHEA: http://identifiers.org/rhea/24576; RHEA: http://identifiers.org/rhea/24577; RHEA: http://identifiers.org/rhea/24578; RHEA: http://identifiers.org/rhea/24579; EC Number: http://identifiers.org/ec-code/3.6.1.1; BioCyc: http://identifiers.org/biocyc/META:INORGPYROPHOSPHAT-RXN; MetaNetX (MNX) Equation: http://identifiers.org/metanetx.reaction/MNXR100808; Reactome Reaction: http://identifiers.or…	1	1	1	1	1	1	1	1	0	0	0
R_PPAKr	'Propionate kinase'	adp_c + ppap_c <-> atp_c + ppa_c	EC Number: http://identifiers.org/ec-code/2.7.2.15; MetaNetX (MNX) Equation: http://identifiers.org/metanetx.reaction/MNXR95897	1	1	1	1	1	1	1	1	0	0	0
R_PPM	'Phosphopentomutase'	r1p_c <-> r5p_c	EC Number: http://identifiers.org/ec-code/5.4.2; EC Number: http://identifiers.org/ec-code/5.4.2.2; EC Number: http://identifiers.org/ec-code/5.4.2.7; BioCyc: http://identifiers.org/biocyc/META:RXN-14456; MetaNetX (MNX) Equation: http://identifiers.org/metanetx.reaction/MNXR103115	1	1	1	1	1	1	1	1	0	0	0
R_PPM2	'Phosphopentomutase 2 (deoxyribose)'	2dr1p_c <-> 2dr5p_c	RHEA: http://identifiers.org/rhea/25205; RHEA: http://identifiers.org/rhea/25206; RHEA: http://identifiers.org/rhea/25207; RHEA: http://identifiers.org/rhea/25208; RHEA: http://identifiers.org/rhea/27658; RHEA: http://identifiers.org/rhea/27659; RHEA: http://identifiers.org/rhea/27660; RHEA: http://identifiers.org/rhea/27661; EC Number: http://identifiers.org/ec-code/5.4.2.7; BioCyc: http://ident…	1	1	1	1	1	1	1	1	0	0	0
R_PROGLYabcpp	'L-Prolinylglycine (Pro-Gly) transport via ABC system (periplasm)'	atp_c + h2o_c + progly_p <-> adp_c + h_c + pi_c + progly_c	MetaNetX (MNX) Equation: http://identifiers.org/metanetx.reaction/MNXR103190; SEED Reaction: http://identifiers.org/seed.reaction/rxn09189	0.375	0.9	1	0	0.0833333	0.0222222	0	0.0108696	0.525	0.88913	0.916667
R_PROHISGLUtr	'Tripeptide Opp3 transport'	atp_c + h2o_c + prohisglu_e <-> adp_c + h_c + pi_c + prohisglu_c		1	1	1	1	1	1	1	1	0	0	0
R_PROabc	'L-proline transport via ABC system'	atp_c + h2o_c + pro__L_e <-> adp_c + h_c + pi_c + pro__L_c	RHEA: http://identifiers.org/rhea/29815#1; RHEA: http://identifiers.org/rhea/29816#1; RHEA: http://identifiers.org/rhea/29817#1; RHEA: http://identifiers.org/rhea/29818#1; BioCyc: http://identifiers.org/biocyc/META:ABC-26-RXN; MetaNetX (MNX) Equation: http://identifiers.org/metanetx.reaction/MNXR103210; SEED Reaction: http://identifiers.org/seed.reaction/rxn05165; SEED Reaction: http://identifier…	1	1	1	1	1	1	1	1	0	0	0
R_PRPPS	'Phosphoribosylpyrophosphate synthetase'	atp_c + r5p_c <-> amp_c + h_c + prpp_c	EC Number: http://identifiers.org/ec-code/2.7.6.1; MetaNetX (MNX) Equation: http://identifiers.org/metanetx.reaction/MNXR103215	1	1	1	1	1	1	1	1	0	0	0
R_PTA2	'Phosphate acetyltransferase'	pi_c + ppcoa_c <-> coa_c + ppap_c	EC Number: http://identifiers.org/ec-code/2.3.1.222; EC Number: http://identifiers.org/ec-code/2.3.1.8; RHEA: http://identifiers.org/rhea/28046; RHEA: http://identifiers.org/rhea/28047; RHEA: http://identifiers.org/rhea/28048; RHEA: http://identifiers.org/rhea/28049; BioCyc: http://identifiers.org/biocyc/META:PTAALT-RXN; MetaNetX (MNX) Equation: http://identifiers.org/metanetx.reaction/MNXR102416…	1	0.9	1	1	1	1	1	1	-0.1	-0.1	0
R_PTAILE	'2 oxobutanoyl coa phosphotransacetylation'	2mbcoa_c + pi_c <-> 2mb_p_c + coa_c		1	1	1	1	1	1	1	1	0	0	0
R_PTALEU	'Isovaleryl coa phosphotransacetylation'	ivcoa_c + pi_c <-> coa_c + iv_p_c		1	1	1	1	1	1	1	1	0	0	0
R_PTAVAL	'Isobutyryl phosphotransacetylase'	ibcoa_c + pi_c <-> coa_c + ib_p_c		1	1	1	1	1	1	1	1	0	0	0
R_PTAr	'Phosphotransacetylase'	accoa_c + pi_c <-> actp_c + coa_c	RHEA: http://identifiers.org/rhea/19521; RHEA: http://identifiers.org/rhea/19522; RHEA: http://identifiers.org/rhea/19523; RHEA: http://identifiers.org/rhea/19524; EC Number: http://identifiers.org/ec-code/2.3.1.8; BioCyc: http://identifiers.org/biocyc/META:PHOSACETYLTRANS-RXN; MetaNetX (MNX) Equation: http://identifiers.org/metanetx.reaction/MNXR103319; KEGG Reaction: http://identifiers.org/kegg…	1	0.9	1	1	1	1	1	1	-0.1	-0.1	0
R_PTHRP	'Phospho-threonine phosphatase'	h2o_c + thrp_c <-> pi_c + thr__L_c		1	1	1	1	1	0.977778	1	0.98913	0	0.0108696	0
R_PTRCORNt7	'Putrescine/ornithine antiporter'	orn_c + ptrc_e <-> orn_e + ptrc_c	RHEA: http://identifiers.org/rhea/28827; RHEA: http://identifiers.org/rhea/28828; RHEA: http://identifiers.org/rhea/28829; RHEA: http://identifiers.org/rhea/28830; BioCyc: http://identifiers.org/biocyc/META:TRANS-RXN0-211; MetaNetX (MNX) Equation: http://identifiers.org/metanetx.reaction/MNXR103336; SEED Reaction: http://identifiers.org/seed.reaction/rxn09214; SEED Reaction: http://identifiers.or…	1	1	1	1	1	1	1	1	0	0	0
R_PTRCabc	'Putrescine transport via ABC system'	atp_c + h2o_c + ptrc_e <-> adp_c + h_c + pi_c + ptrc_c	RHEA: http://identifiers.org/rhea/29995#1; RHEA: http://identifiers.org/rhea/29996#1; RHEA: http://identifiers.org/rhea/29997#1; RHEA: http://identifiers.org/rhea/29998#1; EC Number: http://identifiers.org/ec-code/3.6.3.31; BioCyc: http://identifiers.org/biocyc/META:ABC-25-RXN; MetaNetX (MNX) Equation: http://identifiers.org/metanetx.reaction/MNXR103338; SEED Reaction: http://identifiers.org/seed…	1	1	1	1	1	1	1	1	0	0	0
R_PTRCabcpp	'Putrescine transport via ABC system (periplasm)'	atp_c + h2o_c + ptrc_p <-> adp_c + h_c + pi_c + ptrc_c	RHEA: http://identifiers.org/rhea/29995#1; RHEA: http://identifiers.org/rhea/29996#1; RHEA: http://identifiers.org/rhea/29997#1; RHEA: http://identifiers.org/rhea/29998#1; EC Number: http://identifiers.org/ec-code/3.6.3.31; BioCyc: http://identifiers.org/biocyc/META:ABC-25-RXN; MetaNetX (MNX) Equation: http://identifiers.org/metanetx.reaction/MNXR103338; SEED Reaction: http://identifiers.org/seed…	1	1	1	1	1	1	1	1	0	0	0
R_PUNP1	'Purine-nucleoside phosphorylase (Adenosine)'	adn_c + pi_c <-> ade_c + r1p_c	EC Number: http://identifiers.org/ec-code/2.4.2.1; RHEA: http://identifiers.org/rhea/27642; RHEA: http://identifiers.org/rhea/27643; RHEA: http://identifiers.org/rhea/27644; RHEA: http://identifiers.org/rhea/27645; BioCyc: http://identifiers.org/biocyc/META:ADENPHOSPHOR-RXN; MetaNetX (MNX) Equation: http://identifiers.org/metanetx.reaction/MNXR103343; KEGG Reaction: http://identifiers.org/kegg.re…	0.75	1	1	1	0.944444	1	1	1	0.25	0	0.0555556
R_PUNP1_1	'Purine-nucleoside phosphorylase (Adenosine)'	adn_c + h_c + pi_c <-> ade_c + r1p_c		1	1	1	1	1	1	1	1	0	0	0
R_PUNP2	'Purine-nucleoside phosphorylase (Deoxyadenosine)'	dad_2_c + pi_c <-> 2dr1p_c + ade_c	EC Number: http://identifiers.org/ec-code/2.4.2.1; RHEA: http://identifiers.org/rhea/27742; RHEA: http://identifiers.org/rhea/27743; RHEA: http://identifiers.org/rhea/27744; RHEA: http://identifiers.org/rhea/27745; BioCyc: http://identifiers.org/biocyc/META:DEOXYADENPHOSPHOR-RXN; MetaNetX (MNX) Equation: http://identifiers.org/metanetx.reaction/MNXR103344; KEGG Reaction: http://identifiers.org/ke…	0.75	1	1	1	0.944444	1	1	1	0.25	0	0.0555556
R_PUNP2_1	'Purine-nucleoside phosphorylase (Deoxyadenosine)'	dad_2_c + h_c + pi_c <-> 2dr1p_c + ade_c		1	1	1	1	1	1	1	1	0	0	0
R_PUNP3	'Purine-nucleoside phosphorylase (Guanosine)'	gsn_c + pi_c <-> gua_c + r1p_c	RHEA: http://identifiers.org/rhea/13233; RHEA: http://identifiers.org/rhea/13234; RHEA: http://identifiers.org/rhea/13235; RHEA: http://identifiers.org/rhea/13236; EC Number: http://identifiers.org/ec-code/2.4.2.1; EC Number: http://identifiers.org/ec-code/2.4.2.15; BioCyc: http://identifiers.org/biocyc/META:RXN0-5199; MetaNetX (MNX) Equation: http://identifiers.org/metanetx.reaction/MNXR103345; …	0.875	1	1	1	0.972222	1	1	1	0.125	0	0.0277778
R_PUNP3_1	'Purine-nucleoside phosphorylase (Guanosine)'	gsn_c + h_c + pi_c <-> gua_c + r1p_c		1	1	1	1	1	1	1	1	0	0	0
R_PUNP4	'Purine-nucleoside phosphorylase (Deoxyguanosine)'	dgsn_c + pi_c <-> 2dr1p_c + gua_c	EC Number: http://identifiers.org/ec-code/2.4.2.1; EC Number: http://identifiers.org/ec-code/2.4.2.4; RHEA: http://identifiers.org/rhea/27738; RHEA: http://identifiers.org/rhea/27739; RHEA: http://identifiers.org/rhea/27740; RHEA: http://identifiers.org/rhea/27741; BioCyc: http://identifiers.org/biocyc/META:DEOXYGUANPHOSPHOR-RXN; MetaNetX (MNX) Equation: http://identifiers.org/metanetx.reaction/M…	0.75	1	1	1	0.944444	1	1	1	0.25	0	0.0555556
R_PUNP4_1	'Purine-nucleoside phosphorylase (Deoxyguanosine)'	dgsn_c + h_c + pi_c <-> 2dr1p_c + gua_c		1	1	1	1	1	1	1	1	0	0	0
R_PUNP5	'Purine-nucleoside phosphorylase (Inosine)'	ins_c + pi_c <-> hxan_c + r1p_c	EC Number: http://identifiers.org/ec-code/2.4.2.1; EC Number: http://identifiers.org/ec-code/2.4.2.15; RHEA: http://identifiers.org/rhea/27646; RHEA: http://identifiers.org/rhea/27647; RHEA: http://identifiers.org/rhea/27648; RHEA: http://identifiers.org/rhea/27649; BioCyc: http://identifiers.org/biocyc/META:INOPHOSPHOR-RXN; MetaNetX (MNX) Equation: http://identifiers.org/metanetx.reaction/MNXR10…	0.75	1	1	1	0.944444	1	1	1	0.25	0	0.0555556
R_PUNP5_1	'Purine-nucleoside phosphorylase (Inosine)'	h_c + ins_c + pi_c <-> hxan_c + r1p_c		1	1	1	1	1	1	1	1	0	0	0
R_PUNP6	'Purine-nucleoside phosphorylase (Deoxyinosine)'	din_c + pi_c <-> 2dr1p_c + hxan_c	EC Number: http://identifiers.org/ec-code/2.4.2.1; EC Number: http://identifiers.org/ec-code/2.4.2.4; RHEA: http://identifiers.org/rhea/27750; RHEA: http://identifiers.org/rhea/27751; RHEA: http://identifiers.org/rhea/27752; RHEA: http://identifiers.org/rhea/27753; BioCyc: http://identifiers.org/biocyc/META:DEOXYINOPHOSPHOR-RXN; MetaNetX (MNX) Equation: http://identifiers.org/metanetx.reaction/MN…	0.75	1	1	1	0.944444	1	1	1	0.25	0	0.0555556
R_PUNP6_1	'Purine-nucleoside phosphorylase (Deoxyinosine)'	din_c + h_c + pi_c <-> 2dr1p_c + hxan_c		1	1	1	1	1	1	1	1	0	0	0
R_PUNP7	'Purine-nucleoside phosphorylase (Xanthosine)'	pi_c + xtsn_c <-> r1p_c + xan_c	EC Number: http://identifiers.org/ec-code/2.4.2.-; EC Number: http://identifiers.org/ec-code/2.4.2.1; RHEA: http://identifiers.org/rhea/27638; RHEA: http://identifiers.org/rhea/27639; RHEA: http://identifiers.org/rhea/27640; RHEA: http://identifiers.org/rhea/27641; BioCyc: http://identifiers.org/biocyc/META:XANTHOSINEPHOSPHORY-RXN; MetaNetX (MNX) Equation: http://identifiers.org/metanetx.reaction…	0.75	1	1	1	0.944444	1	1	1	0.25	0	0.0555556
R_PUNP7_1	'Purine-nucleoside phosphorylase (Xanthosine)'	h_c + pi_c + xtsn_c <-> r1p_c + xan_c		1	1	1	1	1	1	1	1	0	0	0
R_PYDXPP	'Pyridoxal 5-phosphate phosphatase'	h2o_c + pydx5p_c <-> pi_c + pydx_c	RHEA: http://identifiers.org/rhea/20533; RHEA: http://identifiers.org/rhea/20534; RHEA: http://identifiers.org/rhea/20535; RHEA: http://identifiers.org/rhea/20536; EC Number: http://identifiers.org/ec-code/3.1.3.74; BioCyc: http://identifiers.org/biocyc/META:3.1.3.74-RXN; MetaNetX (MNX) Equation: http://identifiers.org/metanetx.reaction/MNXR103368; KEGG Reaction: http://identifiers.org/kegg.react…	1	0.9	0.833333	1	1	1	1	1	-0.1	-0.1	-0.166667
R_PYK	'Pyruvate kinase'	adp_c + h_c + pep_c <-> atp_c + pyr_c	RHEA: http://identifiers.org/rhea/18157; RHEA: http://identifiers.org/rhea/18158; RHEA: http://identifiers.org/rhea/18159; RHEA: http://identifiers.org/rhea/18160; EC Number: http://identifiers.org/ec-code/2.7.1.40; BioCyc: http://identifiers.org/biocyc/META:PEPDEPHOS-RXN; MetaNetX (MNX) Equation: http://identifiers.org/metanetx.reaction/MNXR103371; Reactome Reaction: http://identifiers.org/react…	1	0.9	0.833333	1	1	1	1	1	-0.1	-0.1	-0.166667
R_PYK2	'Pyruvate kinase(2)'	h_c + pep_c + udp_c <-> pyr_c + utp_c	EC Number: http://identifiers.org/ec-code/2.7.1.40; MetaNetX (MNX) Equation: http://identifiers.org/metanetx.reaction/MNXR103372; KEGG Reaction: http://identifiers.org/kegg.reaction/R00659; SEED Reaction: http://identifiers.org/seed.reaction/rxn00460	1	1	1	1	1	1	1	1	0	0	0
R_PYK3	'Pyruvate kinase(3)'	h_c + gdp_c + pep_c <-> gtp_c + pyr_c	EC Number: http://identifiers.org/ec-code/2.7.1.40; RHEA: http://identifiers.org/rhea/30295; RHEA: http://identifiers.org/rhea/30296; RHEA: http://identifiers.org/rhea/30297; RHEA: http://identifiers.org/rhea/30298; BioCyc: http://identifiers.org/biocyc/META:RXN-14117; MetaNetX (MNX) Equation: http://identifiers.org/metanetx.reaction/MNXR100460; KEGG Reaction: http://identifiers.org/kegg.reaction…	1	0.9	0.833333	1	1	1	1	1	-0.1	-0.1	-0.166667
R_PYK4	'Pyruvate kinase(4)'	h_c + cdp_c + pep_c <-> pyr_c + ctp_c	EC Number: http://identifiers.org/ec-code/2.7.1.40; MetaNetX (MNX) Equation: http://identifiers.org/metanetx.reaction/MNXR103373; KEGG Reaction: http://identifiers.org/kegg.reaction/R00572; SEED Reaction: http://identifiers.org/seed.reaction/rxn00411	1	0.9	0.833333	1	1	1	1	1	-0.1	-0.1	-0.166667
R_PYK5	'Pyruvate kinase(5)'	h_c + pep_c + idp_c <-> pyr_c + itp_c	EC Number: http://identifiers.org/ec-code/2.7.1.40; MetaNetX (MNX) Equation: http://identifiers.org/metanetx.reaction/MNXR103374; KEGG Reaction: http://identifiers.org/kegg.reaction/R00724; SEED Reaction: http://identifiers.org/seed.reaction/rxn00517	1	0.9	0.833333	1	1	1	1	1	-0.1	-0.1	-0.166667
R_PYNP1	'Pyrimidine-nucleoside phosphorylase (cytosine)'	csn_c + r1p_c <-> cytd_c + pi_c	EC Number: http://identifiers.org/ec-code/2.4.2.2; MetaNetX (MNX) Equation: http://identifiers.org/metanetx.reaction/MNXR103376; KEGG Reaction: http://identifiers.org/kegg.reaction/R02296; SEED Reaction: http://identifiers.org/seed.reaction/rxn01648	1	1	1	1	1	1	1	1	0	0	0
R_PYNP1_1	'Pyrimidine-nucleoside phosphorylase (cytosine)'	cytd_c + h_c + pi_c <-> csn_c + r1p_c		1	1	1	1	1	1	1	1	0	0	0
R_PYNP2r	'Pyrimidine-nucleoside phosphorylase (uracil)'	pi_c + uri_c <-> r1p_c + ura_c	EC Number: http://identifiers.org/ec-code/2.4.2.2; EC Number: http://identifiers.org/ec-code/2.4.2.3; RHEA: http://identifiers.org/rhea/24388; RHEA: http://identifiers.org/rhea/24389; RHEA: http://identifiers.org/rhea/24390; RHEA: http://identifiers.org/rhea/24391; BioCyc: http://identifiers.org/biocyc/META:URPHOS-RXN; MetaNetX (MNX) Equation: http://identifiers.org/metanetx.reaction/MNXR103377; …	1	1	1	1	1	1	1	1	0	0	0
R_PYNP2r_1	'Pyrimidine-nucleoside phosphorylase (uracil)'	h_c + pi_c + uri_c <-> r1p_c + ura_c		1	1	1	1	1	1	1	1	0	0	0
R_R5PP	'Ribose 5-phosphate phosphatase'	h2o_c + r5p_c <-> pi_c + rib__D_c	MetaNetX (MNX) Equation: http://identifiers.org/metanetx.reaction/MNXR103410	1	1	1	1	1	1	1	1	0	0	0
R_RBFK	'Riboflavin kinase'	atp_c + ribflv_c <-> adp_c + fmn_c + h_c	RHEA: http://identifiers.org/rhea/14357; RHEA: http://identifiers.org/rhea/14358; RHEA: http://identifiers.org/rhea/14359; RHEA: http://identifiers.org/rhea/14360; EC Number: http://identifiers.org/ec-code/2.7.1.26; BioCyc: http://identifiers.org/biocyc/META:RIBOFLAVINKIN-RXN; MetaNetX (MNX) Equation: http://identifiers.org/metanetx.reaction/MNXR103429; Reactome Reaction: http://identifiers.org/r…	0.125	0.4	0.333333	0	0.0277778	0	0	0	0.275	0.4	0.305556
R_RBFK_1	'Riboflavin kinase'	atp_c + ribflv_c <-> adp_c + fmn_c		1	0.9	1	1	1	1	1	1	-0.1	-0.1	0
R_RBP4E	'L-ribulose-phosphate 4-epimerase'	ru5p__L_c <-> xu5p__D_c	RHEA: http://identifiers.org/rhea/22368; RHEA: http://identifiers.org/rhea/22369; RHEA: http://identifiers.org/rhea/22370; RHEA: http://identifiers.org/rhea/22371; EC Number: http://identifiers.org/ec-code/5.1.3.4; BioCyc: http://identifiers.org/biocyc/META:RIBULPEPIM-RXN; MetaNetX (MNX) Equation: http://identifiers.org/metanetx.reaction/MNXR103434; KEGG Reaction: http://identifiers.org/kegg.reac…	1	1	1	1	1	1	1	1	0	0	0
R_RIBFLVt2	'Riboflavin transport in via proton symport'	h_e + ribflv_e <-> h_c + ribflv_c	MetaNetX (MNX) Equation: http://identifiers.org/metanetx.reaction/MNXR104030; SEED Reaction: http://identifiers.org/seed.reaction/rxn05645	1	1	1	1	1	1	1	1	0	0	0
R_RIBabc	'D-ribose transport via ABC system'	atp_c + h2o_c + rib__D_e <-> adp_c + h_c + pi_c + rib__D_c	RHEA: http://identifiers.org/rhea/29903#1; RHEA: http://identifiers.org/rhea/29904#1; RHEA: http://identifiers.org/rhea/29905#1; RHEA: http://identifiers.org/rhea/29906#1; EC Number: http://identifiers.org/ec-code/3.6.3.17; BioCyc: http://identifiers.org/biocyc/META:ABC-28-RXN; MetaNetX (MNX) Equation: http://identifiers.org/metanetx.reaction/MNXR104034; SEED Reaction: http://identifiers.org/seed…	1	1	1	1	1	1	1	1	0	0	0
R_RIBabc1	'D ribose transport out via ABC system'	atp_c + h2o_c + rib__D_c <-> adp_c + h_c + pi_c + rib__D_e	RHEA: http://identifiers.org/rhea/29903#2; RHEA: http://identifiers.org/rhea/29904#2; RHEA: http://identifiers.org/rhea/29905#2; RHEA: http://identifiers.org/rhea/29906#2; MetaNetX (MNX) Equation: http://identifiers.org/metanetx.reaction/MNXR104035; SEED Reaction: http://identifiers.org/seed.reaction/rxn05644	1	1	1	1	1	1	1	1	0	0	0
R_RIBabcpp	'D-ribose transport via ABC system (periplasm)'	atp_c + h2o_c + rib__D_p <-> adp_c + h_c + pi_c + rib__D_c	RHEA: http://identifiers.org/rhea/29903#1; RHEA: http://identifiers.org/rhea/29904#1; RHEA: http://identifiers.org/rhea/29905#1; RHEA: http://identifiers.org/rhea/29906#1; EC Number: http://identifiers.org/ec-code/3.6.3.17; BioCyc: http://identifiers.org/biocyc/META:ABC-28-RXN; MetaNetX (MNX) Equation: http://identifiers.org/metanetx.reaction/MNXR104034; SEED Reaction: http://identifiers.org/seed…	1	1	1	1	1	1	1	1	0	0	0
R_RMNabc	'L-rhamnose transport (ATP-dependent)'	atp_c + h2o_c + rmn_e <-> adp_c + h_c + pi_c + rmn_c	MetaNetX (MNX) Equation: http://identifiers.org/metanetx.reaction/MNXR104040	0.25	0.5	0.5	0	0.0555556	0	0	0	0.25	0.5	0.444444
R_RNDR1	'Ribonucleoside-diphosphate reductase (ADP)'	adp_c + trdrd_c <-> dadp_c + h2o_c + trdox_c	EC Number: http://identifiers.org/ec-code/1.17.4.1; BioCyc: http://identifiers.org/biocyc/META:ADPREDUCT-RXN; MetaNetX (MNX) Equation: http://identifiers.org/metanetx.reaction/MNXR104060; KEGG Reaction: http://identifiers.org/kegg.reaction/R02017; SEED Reaction: http://identifiers.org/seed.reaction/rxn05231	1	1	1	1	1	1	1	1	0	0	0
R_RNDR1b	'Ribonucleoside-diphosphate reductase (ADP) (glutaredoxin)'	adp_c + grxrd_c <-> dadp_c + grxox_c + h2o_c	MetaNetX (MNX) Equation: http://identifiers.org/metanetx.reaction/MNXR104061; SEED Reaction: http://identifiers.org/seed.reaction/rxn09231	1	1	1	1	1	1	1	1	0	0	0
R_RNDR2	'Ribonucleoside-diphosphate reductase (GDP)'	gdp_c + trdrd_c <-> dgdp_c + h2o_c + trdox_c	EC Number: http://identifiers.org/ec-code/1.17.4.1; BioCyc: http://identifiers.org/biocyc/META:GDPREDUCT-RXN; MetaNetX (MNX) Equation: http://identifiers.org/metanetx.reaction/MNXR104062; KEGG Reaction: http://identifiers.org/kegg.reaction/R02019; SEED Reaction: http://identifiers.org/seed.reaction/rxn05233	1	1	1	1	1	1	1	1	0	0	0
R_RNDR2b	'Ribonucleoside-diphosphate reductase (GDP) (glutaredoxin)'	gdp_c + grxrd_c <-> dgdp_c + grxox_c + h2o_c	MetaNetX (MNX) Equation: http://identifiers.org/metanetx.reaction/MNXR104063; SEED Reaction: http://identifiers.org/seed.reaction/rxn09232	1	1	1	1	1	1	1	1	0	0	0
R_RNDR3	'Ribonucleoside-diphosphate reductase (CDP)'	cdp_c + trdrd_c <-> dcdp_c + h2o_c + trdox_c	EC Number: http://identifiers.org/ec-code/1.17.4.1; BioCyc: http://identifiers.org/biocyc/META:CDPREDUCT-RXN; MetaNetX (MNX) Equation: http://identifiers.org/metanetx.reaction/MNXR104064; KEGG Reaction: http://identifiers.org/kegg.reaction/R02024; SEED Reaction: http://identifiers.org/seed.reaction/rxn06076	1	1	1	1	1	1	1	1	0	0	0
R_RNDR3b	'Ribonucleoside-diphosphate reductase (CDP) (glutaredoxin)'	cdp_c + grxrd_c <-> dcdp_c + grxox_c + h2o_c	MetaNetX (MNX) Equation: http://identifiers.org/metanetx.reaction/MNXR104065; SEED Reaction: http://identifiers.org/seed.reaction/rxn09233	1	1	1	1	1	1	1	1	0	0	0
R_RNDR4	'Ribonucleoside-diphosphate reductase (UDP)'	trdrd_c + udp_c <-> dudp_c + h2o_c + trdox_c	EC Number: http://identifiers.org/ec-code/1.17.4.1; BioCyc: http://identifiers.org/biocyc/META:UDPREDUCT-RXN; MetaNetX (MNX) Equation: http://identifiers.org/metanetx.reaction/MNXR104066; KEGG Reaction: http://identifiers.org/kegg.reaction/R02018; SEED Reaction: http://identifiers.org/seed.reaction/rxn06075	1	1	1	1	1	1	1	1	0	0	0
R_RNDR4b	'Ribonucleoside-diphosphate reductase (UDP) (glutaredoxin)'	grxrd_c + udp_c <-> dudp_c + grxox_c + h2o_c	MetaNetX (MNX) Equation: http://identifiers.org/metanetx.reaction/MNXR104067; SEED Reaction: http://identifiers.org/seed.reaction/rxn09234	1	1	1	1	1	1	1	1	0	0	0
R_RNTR1	'Ribonucleoside triphosphate reductase ATP'	atp_c + trdrd_c <-> datp_c + h2o_c + trdox_c	EC Number: http://identifiers.org/ec-code/1.17.4.2; MetaNetX (MNX) Equation: http://identifiers.org/metanetx.reaction/MNXR104070; KEGG Reaction: http://identifiers.org/kegg.reaction/R02014; SEED Reaction: http://identifiers.org/seed.reaction/rxn05232	1	1	1	1	1	1	1	1	0	0	0
R_RNTR2	'Ribonucleoside triphosphate reductase GTP'	gtp_c + trdrd_c <-> dgtp_c + h2o_c + trdox_c	EC Number: http://identifiers.org/ec-code/1.17.4.2; MetaNetX (MNX) Equation: http://identifiers.org/metanetx.reaction/MNXR104073; KEGG Reaction: http://identifiers.org/kegg.reaction/R02020; SEED Reaction: http://identifiers.org/seed.reaction/rxn05234	1	1	1	1	1	1	1	1	0	0	0
R_RNTR3	'Ribonucleoside triphosphate reductase CTP'	ctp_c + trdrd_c <-> dctp_c + h2o_c + trdox_c	EC Number: http://identifiers.org/ec-code/1.17.4.2; MetaNetX (MNX) Equation: http://identifiers.org/metanetx.reaction/MNXR104076; KEGG Reaction: http://identifiers.org/kegg.reaction/R02022; SEED Reaction: http://identifiers.org/seed.reaction/rxn05235	1	1	1	1	1	1	1	1	0	0	0
R_RNTR4	'Ribonucleoside triphosphate reductase UTP'	trdrd_c + utp_c <-> dutp_c + h2o_c + trdox_c	EC Number: http://identifiers.org/ec-code/1.17.4.2; MetaNetX (MNX) Equation: http://identifiers.org/metanetx.reaction/MNXR104079; KEGG Reaction: http://identifiers.org/kegg.reaction/R02023; SEED Reaction: http://identifiers.org/seed.reaction/rxn05236	1	1	1	1	1	1	1	1	0	0	0
R_RPE	'Ribulose 5-phosphate 3-epimerase'	ru5p__D_c <-> xu5p__D_c	RHEA: http://identifiers.org/rhea/13677; RHEA: http://identifiers.org/rhea/13678; RHEA: http://identifiers.org/rhea/13679; RHEA: http://identifiers.org/rhea/13680; EC Number: http://identifiers.org/ec-code/5.1.3.1; BioCyc: http://identifiers.org/biocyc/META:RIBULP3EPIM-RXN; MetaNetX (MNX) Equation: http://identifiers.org/metanetx.reaction/MNXR104083; Reactome Reaction: http://identifiers.org/reac…	1	1	1	1	1	1	1	1	0	0	0
R_RPI	'Ribose-5-phosphate isomerase'	r5p_c <-> ru5p__D_c	EC Number: http://identifiers.org/ec-code/5.3.1.6; MetaNetX (MNX) Equation: http://identifiers.org/metanetx.reaction/MNXR104084	1	1	1	1	1	1	1	1	0	0	0
R_SALCpts	'Salicin transport via PEP:Pyr PTS'	pep_c + salcn_e <-> pyr_c + salcn6p_c	MetaNetX (MNX) Equation: http://identifiers.org/metanetx.reaction/MNXR104266; SEED Reaction: http://identifiers.org/seed.reaction/rxn05647	0.875	0.9	0.833333	1	0.972222	0.955556	0.947368	0.967391	0.025	-0.0673913	-0.138889
R_SBTpts	'D-sorbitol transport via PEP:Pyr PTS'	pep_c + sbt__D_e <-> pyr_c + sbt6p_c	MetaNetX (MNX) Equation: http://identifiers.org/metanetx.reaction/MNXR104290; SEED Reaction: http://identifiers.org/seed.reaction/rxn09242; SEED Reaction: http://identifiers.org/seed.reaction/rxn10184	1	1	1	1	1	1	1	1	0	0	0
R_SERGLUGLNtr	'Tripeptide transport'	atp_c + h2o_c + serglugly_e <-> adp_c + h_c + pi_c + serglugly_c		1	1	1	1	1	1	1	1	0	0	0
R_SERabc	'L-serine transport via ABC system'	atp_c + h2o_c + ser__L_e <-> adp_c + h_c + pi_c + ser__L_c	MetaNetX (MNX) Equation: http://identifiers.org/metanetx.reaction/MNXR104351; SEED Reaction: http://identifiers.org/seed.reaction/rxn10883	1	1	1	1	1	1	1	1	0	0	0
R_SO3abcpp	'Sulfite transport via ABC system (periplasm)'	atp_c + h2o_c + so3_p <-> adp_c + h_c + pi_c + so3_c	MetaNetX (MNX) Equation: http://identifiers.org/metanetx.reaction/MNXR104458	1	1	1	1	1	1	1	1	0	0	0
R_SPMDabc	'Spermidine transport via ABC system'	atp_c + h2o_c + spmd_e <-> adp_c + h_c + pi_c + spmd_c	RHEA: http://identifiers.org/rhea/29999#1; EC Number: http://identifiers.org/ec-code/3.6.3.31; RHEA: http://identifiers.org/rhea/30000#1; RHEA: http://identifiers.org/rhea/30001#1; RHEA: http://identifiers.org/rhea/30002#1; BioCyc: http://identifiers.org/biocyc/META:ABC-24-RXN; MetaNetX (MNX) Equation: http://identifiers.org/metanetx.reaction/MNXR104494; SEED Reaction: http://identifiers.org/seed…	1	1	1	1	1	1	1	1	0	0	0
R_SPMDabcpp	'Spermidine transport via ABC system (periplasm)'	atp_c + h2o_c + spmd_p <-> adp_c + h_c + pi_c + spmd_c	RHEA: http://identifiers.org/rhea/29999#1; EC Number: http://identifiers.org/ec-code/3.6.3.31; RHEA: http://identifiers.org/rhea/30000#1; RHEA: http://identifiers.org/rhea/30001#1; RHEA: http://identifiers.org/rhea/30002#1; BioCyc: http://identifiers.org/biocyc/META:ABC-24-RXN; MetaNetX (MNX) Equation: http://identifiers.org/metanetx.reaction/MNXR104494; SEED Reaction: http://identifiers.org/seed…	1	1	1	1	1	1	1	1	0	0	0
R_SUCD1	'Succinate dehydrogenase'	fad_c + succ_c <-> fadh2_c + fum_c	EC Number: http://identifiers.org/ec-code/1.3.5.1; RHEA: http://identifiers.org/rhea/30343; RHEA: http://identifiers.org/rhea/30344; RHEA: http://identifiers.org/rhea/30345; RHEA: http://identifiers.org/rhea/30346; MetaNetX (MNX) Equation: http://identifiers.org/metanetx.reaction/MNXR99636; KEGG Reaction: http://identifiers.org/kegg.reaction/R00408; SEED Reaction: http://identifiers.org/seed.reac…	0.125	0.2	0.166667	0	0.0277778	0.0222222	0	0.0108696	0.075	0.18913	0.138889
R_SUCD4	'Succinate dehyrdogenase'	fadh2_c + q8_c <-> fad_c + q8h2_c	MetaNetX (MNX) Equation: http://identifiers.org/metanetx.reaction/MNXR104630; SEED Reaction: http://identifiers.org/seed.reaction/rxn10126	0.125	0.2	0.166667	0.0357143	0.0555556	0	0	0.0108696	0.075	0.18913	0.111111
R_SUCR	'Sucrose hydrolyzing enzyme'	h2o_c + sucr_c <-> fru_c + glc__D_c	EC Number: http://identifiers.org/ec-code/2.4.1.10; EC Number: http://identifiers.org/ec-code/2.4.1.4; EC Number: http://identifiers.org/ec-code/2.4.1.9; EC Number: http://identifiers.org/ec-code/3.2.1.10; EC Number: http://identifiers.org/ec-code/3.2.1.20; EC Number: http://identifiers.org/ec-code/3.2.1.26; EC Number: http://identifiers.org/ec-code/3.2.1.48; MetaNetX (MNX) Equation: http://ident…	1	0.6	0.833333	0.964286	0.972222	1	0.947368	0.978261	-0.4	-0.378261	-0.138889
R_SUCpts	'Sucrose transport via PEP:Pyr PTS'	pep_c + sucr_e <-> pyr_c + suc6p_c	MetaNetX (MNX) Equation: http://identifiers.org/metanetx.reaction/MNXR104643; SEED Reaction: http://identifiers.org/seed.reaction/rxn05655; SEED Reaction: http://identifiers.org/seed.reaction/rxn09274	1	1	1	1	1	1	1	1	0	0	0
R_SULabc	'Sulfate transport via ABC system'	atp_c + h2o_c + so4_e <-> adp_c + h_c + pi_c + so4_c	RHEA: http://identifiers.org/rhea/10192#1; RHEA: http://identifiers.org/rhea/10193#1; RHEA: http://identifiers.org/rhea/10194#1; RHEA: http://identifiers.org/rhea/10195#1; EC Number: http://identifiers.org/ec-code/3.6.3.25; BioCyc: http://identifiers.org/biocyc/META:3.6.3.25-RXN; BioCyc: http://identifiers.org/biocyc/META:ABC-70-RXN; MetaNetX (MNX) Equation: http://identifiers.org/metanetx.reacti…	1	1	1	1	1	1	1	1	0	0	0
R_St	'Sulfur diffusion'	s_e <-> s_c	MetaNetX (MNX) Equation: http://identifiers.org/metanetx.reaction/MNXR138845	0.5	0.6	0.666667	0.464286	0.472222	0.577778	0.526316	0.532609	0.1	0.0673913	0.194444
R_TAURabc	'Taurine transport via ABC system'	atp_c + h2o_c + taur_e <-> adp_c + h_c + pi_c + taur_c	RHEA: http://identifiers.org/rhea/14613#1; RHEA: http://identifiers.org/rhea/14614#1; RHEA: http://identifiers.org/rhea/14615#1; RHEA: http://identifiers.org/rhea/14616#1; EC Number: http://identifiers.org/ec-code/3.6.3.36; BioCyc: http://identifiers.org/biocyc/META:3.6.3.36-RXN; BioCyc: http://identifiers.org/biocyc/META:ABC-64-RXN; MetaNetX (MNX) Equation: http://identifiers.org/metanetx.reacti…	1	1	1	0.892857	0.916667	0.755556	1	0.847826	0	0.152174	0.0833333
R_TCYNTtpp	'Thiocyanate transport via diffusion periplasm to periplasm'	tcynt_p <-> tcynt_c		0.625	0.6	0.666667	0.714286	0.694444	0.488889	0.789474	0.619565	-0.025	-0.0195652	-0.0277778
R_THFAT	'Tetrahydrofolate aminomethyltransferase'	h2o_c + methf_c <-> 5fthf_c + h_c	EC Number: http://identifiers.org/ec-code/2.1.2.10; RHEA: http://identifiers.org/rhea/34767; RHEA: http://identifiers.org/rhea/34768; RHEA: http://identifiers.org/rhea/34769; RHEA: http://identifiers.org/rhea/34770; MetaNetX (MNX) Equation: http://identifiers.org/metanetx.reaction/MNXR99614; KEGG Reaction: http://identifiers.org/kegg.reaction/R02300; SEED Reaction: http://identifiers.org/seed.rea…	1	1	1	1	1	1	1	1	0	0	0
R_THFOR1	'5,6,7,8-Tetrahydrofolate:NAD+ oxidoreductase'	fol_c + 2.0 h_c + 2.0 nadh_c <-> 2.0 nad_c + thf_c	EC Number: http://identifiers.org/ec-code/1.5.1.3; MetaNetX (MNX) Equation: http://identifiers.org/metanetx.reaction/MNXR104809; KEGG Reaction: http://identifiers.org/kegg.reaction/R00937	1	1	1	0.892857	0.916667	0.933333	0.894737	0.913043	0	0.0869565	0.0833333
R_THFOR2	'5,6,7,8-Tetrahydrofolate:NADP+ oxidoreductase'	fol_c + 2.0 h_c + 2.0 nadph_c <-> 2.0 nadp_c + thf_c	EC Number: http://identifiers.org/ec-code/1.5.1.3; MetaNetX (MNX) Equation: http://identifiers.org/metanetx.reaction/MNXR104810; KEGG Reaction: http://identifiers.org/kegg.reaction/R00940	0.875	1	1	0.928571	0.916667	0.888889	0.842105	0.891304	0.125	0.108696	0.0833333
R_THIORDXi	'Hydrogen peroxide reductase (thioredoxin)'	h2o2_c + trdrd_c <-> 2.0 h2o_c + trdox_c	EC Number: http://identifiers.org/ec-code/1.11.1.15; EC Number: http://identifiers.org/ec-code/1.11.1.16; BioCyc: http://identifiers.org/biocyc/META:RXN0-267; MetaNetX (MNX) Equation: http://identifiers.org/metanetx.reaction/MNXR104815; SEED Reaction: http://identifiers.org/seed.reaction/rxn09296	1	1	1	1	1	1	1	1	0	0	0
R_THRA	'Threonine aldolase'	thr__L_c <-> acald_c + gly_c	RHEA: http://identifiers.org/rhea/19625; RHEA: http://identifiers.org/rhea/19626; RHEA: http://identifiers.org/rhea/19627; RHEA: http://identifiers.org/rhea/19628; EC Number: http://identifiers.org/ec-code/4.1.2.48; EC Number: http://identifiers.org/ec-code/4.1.2.5; BioCyc: http://identifiers.org/biocyc/META:THREONINE-ALDOLASE-RXN; MetaNetX (MNX) Equation: http://identifiers.org/metanetx.reaction…	1	1	1	1	1	1	1	1	0	0	0
R_THRA2	'L-allo-Threonine Aldolase'	athr__L_c <-> acald_c + gly_c		1	1	1	1	1	1	1	1	0	0	0
R_THRabc	'L-threonine transport via ABC system'	atp_c + h2o_c + thr__L_e <-> adp_c + h_c + pi_c + thr__L_c	MetaNetX (MNX) Equation: http://identifiers.org/metanetx.reaction/MNXR104849; SEED Reaction: http://identifiers.org/seed.reaction/rxn05169; SEED Reaction: http://identifiers.org/seed.reaction/rxn09301	1	1	1	1	1	1	1	1	0	0	0
R_TKT1	'Transketolase'	r5p_c + xu5p__D_c <-> g3p_c + s7p_c	EC Number: http://identifiers.org/ec-code/2.2.1.1; MetaNetX (MNX) Equation: http://identifiers.org/metanetx.reaction/MNXR104868	1	1	1	1	1	1	1	1	0	0	0
R_TKT2	'Transketolase'	e4p_c + xu5p__D_c <-> f6p_c + g3p_c	EC Number: http://identifiers.org/ec-code/2.2.1.1; RHEA: http://identifiers.org/rhea/27626; RHEA: http://identifiers.org/rhea/27627; RHEA: http://identifiers.org/rhea/27628; RHEA: http://identifiers.org/rhea/27629; BioCyc: http://identifiers.org/biocyc/META:2TRANSKETO-RXN; MetaNetX (MNX) Equation: http://identifiers.org/metanetx.reaction/MNXR104869; KEGG Reaction: http://identifiers.org/kegg.reac…	1	1	1	1	1	1	1	1	0	0	0
R_TMDK1	'Thymidine kinase (ATP:thymidine)'	atp_c + thymd_c <-> adp_c + dtmp_c + h_c	RHEA: http://identifiers.org/rhea/19129; RHEA: http://identifiers.org/rhea/19130; RHEA: http://identifiers.org/rhea/19131; RHEA: http://identifiers.org/rhea/19132; EC Number: http://identifiers.org/ec-code/2.7.1.145; EC Number: http://identifiers.org/ec-code/2.7.1.21; BioCyc: http://identifiers.org/biocyc/META:THYKI-RXN; MetaNetX (MNX) Equation: http://identifiers.org/metanetx.reaction/MNXR104885…	1	1	1	1	1	1	1	1	0	0	0
R_TMDK1_1	'Thymidine kinase (ATP:thymidine)'	atp_c + thymd_c <-> adp_c + dtmp_c		1	1	1	1	1	1	1	1	0	0	0
R_TMDPP	'Thymidine phosphorylase'	pi_c + thymd_c <-> 2dr1p_c + thym_c	RHEA: http://identifiers.org/rhea/16037; RHEA: http://identifiers.org/rhea/16038; RHEA: http://identifiers.org/rhea/16039; RHEA: http://identifiers.org/rhea/16040; EC Number: http://identifiers.org/ec-code/2.4.2.2; EC Number: http://identifiers.org/ec-code/2.4.2.4; BioCyc: http://identifiers.org/biocyc/META:THYM-PHOSPH-RXN; MetaNetX (MNX) Equation: http://identifiers.org/metanetx.reaction/MNXR104…	1	1	1	1	1	1	1	1	0	0	0
R_TMDS	'Thymidylate synthase'	dump_c + mlthf_c <-> dhf_c + dtmp_c	RHEA: http://identifiers.org/rhea/12104; RHEA: http://identifiers.org/rhea/12105; RHEA: http://identifiers.org/rhea/12106; RHEA: http://identifiers.org/rhea/12107; EC Number: http://identifiers.org/ec-code/2.1.1.45; MetaNetX (MNX) Equation: http://identifiers.org/metanetx.reaction/MNXR104889; KEGG Reaction: http://identifiers.org/kegg.reaction/R02101	1	1	1	1	1	1	1	1	0	0	0
R_TMK	'Thiamine kinase'	atp_c + thm_c <-> adp_c + h_c + thmmp_c	EC Number: http://identifiers.org/ec-code/2.7.1.89; MetaNetX (MNX) Equation: http://identifiers.org/metanetx.reaction/MNXR138875; SEED Reaction: http://identifiers.org/seed.reaction/rxn01538	1	0.8	0.666667	0.571429	0.666667	0.777778	0.736842	0.706522	-0.2	0.0934783	0
R_TPI	'Triose-phosphate isomerase'	dhap_c <-> g3p_c	RHEA: http://identifiers.org/rhea/18585; RHEA: http://identifiers.org/rhea/18586; RHEA: http://identifiers.org/rhea/18587; RHEA: http://identifiers.org/rhea/18588; EC Number: http://identifiers.org/ec-code/5.3.1.1; BioCyc: http://identifiers.org/biocyc/META:TRIOSEPISOMERIZATION-RXN; MetaNetX (MNX) Equation: http://identifiers.org/metanetx.reaction/MNXR104918; Reactome Reaction: http://identifiers…	1	1	1	1	1	1	1	1	0	0	0
R_TRDR	'Thioredoxin reductase (NADPH)'	h_c + nadph_c + trdox_c <-> nadp_c + trdrd_c	EC Number: http://identifiers.org/ec-code/1.6.4.5; EC Number: http://identifiers.org/ec-code/1.8.1.9; BioCyc: http://identifiers.org/biocyc/META:THIOREDOXIN-REDUCT-NADPH-RXN; MetaNetX (MNX) Equation: http://identifiers.org/metanetx.reaction/MNXR104766; KEGG Reaction: http://identifiers.org/kegg.reaction/R02016; SEED Reaction: http://identifiers.org/seed.reaction/rxn05289	1	1	1	1	1	1	1	1	0	0	0
R_TRE6PH	'Trehalose-6-phosphate hydrolase'	h2o_c + tre6p_c <-> g6p_c + glc__D_c	RHEA: http://identifiers.org/rhea/23008; RHEA: http://identifiers.org/rhea/23009; RHEA: http://identifiers.org/rhea/23010; RHEA: http://identifiers.org/rhea/23011; EC Number: http://identifiers.org/ec-code/3.2.1.122; EC Number: http://identifiers.org/ec-code/3.2.1.93; BioCyc: http://identifiers.org/biocyc/META:TRE6PHYDRO-RXN; MetaNetX (MNX) Equation: http://identifiers.org/metanetx.reaction/MNXR1…	1	1	1	1	1	1	1	1	0	0	0
R_TREabc	'Trehalose transport via ABC system'	atp_c + h2o_c + tre_e <-> tre_c + adp_c + h_c + pi_c	MetaNetX (MNX) Equation: http://identifiers.org/metanetx.reaction/MNXR104930; SEED Reaction: http://identifiers.org/seed.reaction/rxn10839	1	0.9	1	1	1	1	1	1	-0.1	-0.1	0
R_TREpts	'Trehalose transport via PEP:Pyr PTS'	pep_c + tre_e <-> pyr_c + tre6p_c	EC Number: http://identifiers.org/ec-code/2.7.1.69; MetaNetX (MNX) Equation: http://identifiers.org/metanetx.reaction/MNXR104931; SEED Reaction: http://identifiers.org/seed.reaction/rxn02005; SEED Reaction: http://identifiers.org/seed.reaction/rxn09322	1	1	1	1	1	1	1	1	0	0	0
R_TRPabc	''	atp_c + h2o_c + trp__L_e <-> adp_c + h_c + pi_c + trp__L_c		1	1	1	1	1	1	1	1	0	0	0
R_TSULabcpp	'Thiosulfate transport via ABC system (periplasm)'	atp_c + h2o_c + tsul_p <-> adp_c + h_c + pi_c + tsul_c	RHEA: http://identifiers.org/rhea/29871#1; RHEA: http://identifiers.org/rhea/29872#1; RHEA: http://identifiers.org/rhea/29873#1; RHEA: http://identifiers.org/rhea/29874#1; EC Number: http://identifiers.org/ec-code/3.6.3.25; BioCyc: http://identifiers.org/biocyc/META:ABC-7-RXN; MetaNetX (MNX) Equation: http://identifiers.org/metanetx.reaction/MNXR104964; SEED Reaction: http://identifiers.org/seed.…	1	1	1	1	1	1	1	1	0	0	0
R_TYRabc	''	atp_c + h2o_c + tyr__L_e <-> adp_c + h_c + pi_c + tyr__L_c		1	1	1	1	1	1	1	1	0	0	0
R_UMPK	'UMP kinase'	atp_c + ump_c <-> adp_c + udp_c	EC Number: http://identifiers.org/ec-code/2.7.4.14; EC Number: http://identifiers.org/ec-code/2.7.4.22; EC Number: http://identifiers.org/ec-code/2.7.4.4; RHEA: http://identifiers.org/rhea/24400; RHEA: http://identifiers.org/rhea/24401; RHEA: http://identifiers.org/rhea/24402; RHEA: http://identifiers.org/rhea/24403; BioCyc: http://identifiers.org/biocyc/META:RXN-12002; MetaNetX (MNX) Equation: h…	1	1	1	1	1	1	1	1	0	0	0
R_UPPRT	'Uracil phosphoribosyltransferase'	prpp_c + ura_c <-> ppi_c + ump_c	RHEA: http://identifiers.org/rhea/13017; RHEA: http://identifiers.org/rhea/13018; RHEA: http://identifiers.org/rhea/13019; RHEA: http://identifiers.org/rhea/13020; EC Number: http://identifiers.org/ec-code/2.4.2.9; BioCyc: http://identifiers.org/biocyc/META:URACIL-PRIBOSYLTRANS-RXN; MetaNetX (MNX) Equation: http://identifiers.org/metanetx.reaction/MNXR105142; KEGG Reaction: http://identifiers.org…	1	1	1	1	1	1	1	1	0	0	0
R_URIDK2r	'Uridylate kinase (dUMP)'	atp_c + dump_c <-> adp_c + dudp_c	EC Number: http://identifiers.org/ec-code/2.7.4.13; EC Number: http://identifiers.org/ec-code/2.7.4.4; EC Number: http://identifiers.org/ec-code/2.7.4.9; RHEA: http://identifiers.org/rhea/30655; RHEA: http://identifiers.org/rhea/30656; RHEA: http://identifiers.org/rhea/30657; RHEA: http://identifiers.org/rhea/30658; BioCyc: http://identifiers.org/biocyc/META:RXN-14122; MetaNetX (MNX) Equation: ht…	1	1	1	1	1	1	1	1	0	0	0
R_VALabc	'L-valine transport via ABC system'	atp_c + h2o_c + val__L_e <-> adp_c + h_c + pi_c + val__L_c	RHEA: http://identifiers.org/rhea/29803#2; RHEA: http://identifiers.org/rhea/29804#2; RHEA: http://identifiers.org/rhea/29805#2; RHEA: http://identifiers.org/rhea/29806#2; BioCyc: http://identifiers.org/biocyc/META:ABC-36-RXN; MetaNetX (MNX) Equation: http://identifiers.org/metanetx.reaction/MNXR105187; SEED Reaction: http://identifiers.org/seed.reaction/rxn05168; SEED Reaction: http://identifier…	1	1	1	1	1	1	1	1	0	0	0
R_X5PL3E	'L-xylulose 5-phosphate 3-epimerase'	xu5p__L_c <-> ru5p__L_c	RHEA: http://identifiers.org/rhea/18497; RHEA: http://identifiers.org/rhea/18498; RHEA: http://identifiers.org/rhea/18499; RHEA: http://identifiers.org/rhea/18500; EC Number: http://identifiers.org/ec-code/5.-.-.-; EC Number: http://identifiers.org/ec-code/5.1.3.22; BioCyc: http://identifiers.org/biocyc/META:LXULRU5P-RXN; MetaNetX (MNX) Equation: http://identifiers.org/metanetx.reaction/MNXR10522…	1	1	1	1	1	1	1	1	0	0	0
R_XPPT	'Xanthine phosphoribosyltransferase'	prpp_c + xan_c <-> ppi_c + xmp_c	RHEA: http://identifiers.org/rhea/10800; RHEA: http://identifiers.org/rhea/10801; RHEA: http://identifiers.org/rhea/10802; RHEA: http://identifiers.org/rhea/10803; EC Number: http://identifiers.org/ec-code/2.4.2.22; EC Number: http://identifiers.org/ec-code/2.4.2.8; BioCyc: http://identifiers.org/biocyc/META:XANPRIBOSYLTRAN-RXN; MetaNetX (MNX) Equation: http://identifiers.org/metanetx.reaction/MN…	1	1	1	1	1	1	1	1	0	0	0
R_XYLabc	'D-xylose transport via ABC system'	atp_c + xyl__D_e + h2o_c <-> adp_c + h_c + pi_c + xyl__D_c	RHEA: http://identifiers.org/rhea/29899#1; RHEA: http://identifiers.org/rhea/29900#1; RHEA: http://identifiers.org/rhea/29901#1; RHEA: http://identifiers.org/rhea/29902#1; MetaNetX (MNX) Equation: http://identifiers.org/metanetx.reaction/MNXR105268; SEED Reaction: http://identifiers.org/seed.reaction/rxn05167; SEED Reaction: http://identifiers.org/seed.reaction/rxn09383	0.5	0.4	0.333333	0.107143	0.194444	0.0888889	0.157895	0.108696	-0.1	0.291304	0.138889
R_XYLabcpp	'D-xylose transport via ABC system (periplasm)'	atp_c + h2o_c + xyl__D_p <-> adp_c + h_c + pi_c + xyl__D_c	RHEA: http://identifiers.org/rhea/29899#1; RHEA: http://identifiers.org/rhea/29900#1; RHEA: http://identifiers.org/rhea/29901#1; RHEA: http://identifiers.org/rhea/29902#1; MetaNetX (MNX) Equation: http://identifiers.org/metanetx.reaction/MNXR105268; SEED Reaction: http://identifiers.org/seed.reaction/rxn05167; SEED Reaction: http://identifiers.org/seed.reaction/rxn09383	0.75	0.5	0.5	1	0.944444	0.977778	1	0.98913	-0.25	-0.48913	-0.444444
R_YUMPS	'YUMP synthetase'	r5p_c + ura_c <-> h2o_c + psd5p_c	MetaNetX (MNX) Equation: http://identifiers.org/metanetx.reaction/MNXR103310	1	1	1	1	1	1	1	1	0	0	0
R_ZNabc	'Zinc transport via ABC system'	atp_c + h2o_c + zn2_e <-> adp_c + h_c + pi_c + zn2_c	RHEA: http://identifiers.org/rhea/29795; RHEA: http://identifiers.org/rhea/29796; RHEA: http://identifiers.org/rhea/29797; RHEA: http://identifiers.org/rhea/29798; EC Number: http://identifiers.org/ec-code/3.6.3.5; BioCyc: http://identifiers.org/biocyc/META:ABC-63-RXN; MetaNetX (MNX) Equation: http://identifiers.org/metanetx.reaction/MNXR105281; SEED Reaction: http://identifiers.org/seed.reaction…	1	1	1	1	1	1	1	1	0	0	0
R_r0280	'DATP:pyruvate O2-phosphotransferase Purine metabolism EC:2.7.1.40'	dadp_c + h_c + pep_c <-> datp_c + pyr_c	EC Number: http://identifiers.org/ec-code/2.7.1.40; RHEA: http://identifiers.org/rhea/30727; RHEA: http://identifiers.org/rhea/30728; RHEA: http://identifiers.org/rhea/30729; RHEA: http://identifiers.org/rhea/30730; BioCyc: http://identifiers.org/biocyc/META:RXN-14192; MetaNetX (MNX) Equation: http://identifiers.org/metanetx.reaction/MNXR97145; KEGG Reaction: http://identifiers.org/kegg.reaction/…	1	0.9	0.833333	1	1	1	1	1	-0.1	-0.1	-0.166667
R_r0963	'Facilitated diffusion'	fol_e <-> fol_c	MetaNetX (MNX) Equation: http://identifiers.org/metanetx.reaction/MNXR105408; Reactome Reaction: http://identifiers.org/reactome/R-BTA-200646; Reactome Reaction: http://identifiers.org/reactome/R-BTA-200729; Reactome Reaction: http://identifiers.org/reactome/R-CEL-200646; Reactome Reaction: http://identifiers.org/reactome/R-CEL-200729; Reactome Reaction: http://identifiers.org/reactome/R-CFA-2006…	1	1	1	0.964286	0.972222	1	1	0.98913	0	0.0108696	0.0277778
R_r2136	'Major Facilitator(MFS) TCDB:2.A.1.14.6'	na1_e + pi_e <-> na1_c + pi_c	MetaNetX (MNX) Equation: http://identifiers.org/metanetx.reaction/MNXR102849; Reactome Reaction: http://identifiers.org/reactome/R-BTA-2872498; Reactome Reaction: http://identifiers.org/reactome/R-BTA-428609; Reactome Reaction: http://identifiers.org/reactome/R-CEL-2872498; Reactome Reaction: http://identifiers.org/reactome/R-CEL-428609; Reactome Reaction: http://identifiers.org/reactome/R-CFA-28…	1	1	1	1	1	1	1	1	0	0	0
R_3NUCLE3	'3 nucleotidase 3 cMP'	3cmp_c + h2o_c <-> cytd_c + pi_c	RHEA: http://identifiers.org/rhea/27894; RHEA: http://identifiers.org/rhea/27895; RHEA: http://identifiers.org/rhea/27896; RHEA: http://identifiers.org/rhea/27897; EC Number: http://identifiers.org/ec-code/3.1.3.6; BioCyc: http://identifiers.org/biocyc/META:RXN-14090; MetaNetX (MNX) Equation: http://identifiers.org/metanetx.reaction/MNXR94934; KEGG Reaction: http://identifiers.org/kegg.reaction/R…	0.125	0.3	0.333333	0.107143	0.111111	0.0666667	0.0526316	0.076087	0.175	0.223913	0.222222
R_5DOAN	'5''-deoxyadenosine nuclosidase'	dad_5_c + h2o_c <-> 5drib_c + ade_c	RHEA: http://identifiers.org/rhea/29859; RHEA: http://identifiers.org/rhea/29860; RHEA: http://identifiers.org/rhea/29861; RHEA: http://identifiers.org/rhea/29862; BioCyc: http://identifiers.org/biocyc/META:RXN0-6550; MetaNetX (MNX) Equation: http://identifiers.org/metanetx.reaction/MNXR95069; SEED Reaction: http://identifiers.org/seed.reaction/rxn08013; SEED Reaction: http://identifiers.org/seed…	0.125	0.1	0	0.0714286	0.0833333	0.0666667	0.0526316	0.0652174	-0.025	0.0347826	-0.0833333
R_DHPTDCs2	'4,5-dihydroxy-2,3-pentanedione cyclization (spontaneous)'	dhptd_c <-> mdhdhf_c	RHEA: http://identifiers.org/rhea/35155; RHEA: http://identifiers.org/rhea/35156; RHEA: http://identifiers.org/rhea/35157; RHEA: http://identifiers.org/rhea/35158; BioCyc: http://identifiers.org/biocyc/META:RXN-10015; MetaNetX (MNX) Equation: http://identifiers.org/metanetx.reaction/MNXR97442	0.125	0.2	0.166667	0.392857	0.333333	0.333333	0.210526	0.326087	0.075	-0.126087	-0.166667
R_GLCOASYNT	'Glutaryl CoAdihydrolipoamide S succinyltransferase'	coa_c + S_gtrdhdlp_c <-> dhlam_c + glutcoa_c	EC Number: http://identifiers.org/ec-code/2.3.1.61; MetaNetX (MNX) Equation: http://identifiers.org/metanetx.reaction/MNXR100213; SEED Reaction: http://identifiers.org/seed.reaction/rxn01873; SEED Reaction: http://identifiers.org/seed.reaction/rxn11960	0	0.2	0	0	0	0	0	0	0.2	0.2	0
R_MTHTHFSs	'(2R,4S)-2-methyl-2,3,3,4-tetrahydroxytetrahydrofuran synthesis (spontaneous)'	h2o_c + mdhdhf_c <-> mththf_c	RHEA: http://identifiers.org/rhea/35159; RHEA: http://identifiers.org/rhea/35160; RHEA: http://identifiers.org/rhea/35161; RHEA: http://identifiers.org/rhea/35162; BioCyc: http://identifiers.org/biocyc/META:RXN-10017; MetaNetX (MNX) Equation: http://identifiers.org/metanetx.reaction/MNXR101756	0.125	0.2	0.166667	0.392857	0.333333	0.333333	0.210526	0.326087	0.075	-0.126087	-0.166667
R_OXOADLR	'2 Oxoadipatelipoamde 2 oxidoreductase decarboxylating and acceptor succinylating'	lpam_c + 2oxoadp_c + h_c <-> co2_c + S_gtrdhdlp_c	EC Number: http://identifiers.org/ec-code/1.2.4.2; MetaNetX (MNX) Equation: http://identifiers.org/metanetx.reaction/MNXR102246; SEED Reaction: http://identifiers.org/seed.reaction/rxn01424; SEED Reaction: http://identifiers.org/seed.reaction/rxn11955	0	0.1	0	0	0	0	0	0	0.1	0.1	0
R_PG160abcpp	'Phosphatidylglycerol transport via ABC system (n-C16:0, periplasm)'	atp_c + h2o_c + pg160_c <-> adp_c + h_c + pi_c + pg160_p	MetaNetX (MNX) Equation: http://identifiers.org/metanetx.reaction/MNXR102519; SEED Reaction: http://identifiers.org/seed.reaction/rxn09088	0.875	0.9	1	0.785714	0.805556	0.777778	0.842105	0.793478	0.025	0.106522	0.194444
R_4ABUTabcpp	'GABA transport via ABC system periplasm'	4abut_p + atp_c + h2o_c <-> 4abut_c + adp_c + h_c + pi_c		0.25	0.5	0.333333	0	0.0555556	0.0222222	0	0.0108696	0.25	0.48913	0.277778
R_AMPTASEGGLU	'Aminopeptidase Gly Glu'	glyglu_c + h2o_c <-> glu__L_c + gly_c		0.125	0.5	0.5	0	0.0277778	0	0	0	0.375	0.5	0.472222
R_AMPTASEGS	'Aminopeptidase Gly Ser'	glyser_c + h2o_c <-> gly_c + ser__L_c		0.125	0.6	0.666667	0	0.0277778	0	0	0	0.475	0.6	0.638889
R_AMPTASEHG	'Aminopeptidase His Gly'	h2o_c + hisgly_c <-> gly_c + his__L_c		0.125	0.5	0.5	0	0.0277778	0	0	0	0.375	0.5	0.472222
R_CELLBabc	'Cellobiose transport via ATP transporter'	atp_c + cellb_e + h2o_c <-> adp_c + cellb_c + h_c + pi_c	MetaNetX (MNX) Equation: http://identifiers.org/metanetx.reaction/MNXR96587	0.125	0.5	0.5	0	0.0277778	0	0	0	0.375	0.5	0.472222
R_CLPNS161pp	'Cardiolipin synthase (periplasmic, n-C16:1)'	2.0 pg161_p <-> clpn161_p + glyc_p	MetaNetX (MNX) Equation: http://identifiers.org/metanetx.reaction/MNXR96786	0	0.2	0	0.0357143	0.0277778	0	0	0.0108696	0.2	0.18913	-0.0277778
R_PPIabc	'Diphosphate transport in via ABC system'	atp_c + h2o_c + ppi_e <-> adp_c + h_c + pi_c + ppi_c	MetaNetX (MNX) Equation: http://identifiers.org/metanetx.reaction/MNXR103111; SEED Reaction: http://identifiers.org/seed.reaction/rxn05635	0.25	0.3	0.166667	0	0.0555556	0	0	0	0.05	0.3	0.111111
R_ZNabcpp	'Zinc (Zn+2) transport via ABC system (periplasm)'	atp_c + h2o_c + zn2_p <-> adp_c + h_c + pi_c + zn2_c	RHEA: http://identifiers.org/rhea/29795; RHEA: http://identifiers.org/rhea/29796; RHEA: http://identifiers.org/rhea/29797; RHEA: http://identifiers.org/rhea/29798; EC Number: http://identifiers.org/ec-code/3.6.3.5; BioCyc: http://identifiers.org/biocyc/META:ABC-63-RXN; MetaNetX (MNX) Equation: http://identifiers.org/metanetx.reaction/MNXR105281; SEED Reaction: http://identifiers.org/seed.reaction…	0.25	0.5	0.5	0	0.0555556	0	0.105263	0.0217391	0.25	0.478261	0.444444
R_3NUCLE1	'3 nucleotidase 3 AMP'	3amp_c + h2o_c <-> adn_c + pi_c	RHEA: http://identifiers.org/rhea/27898; RHEA: http://identifiers.org/rhea/27899; RHEA: http://identifiers.org/rhea/27900; RHEA: http://identifiers.org/rhea/27901; EC Number: http://identifiers.org/ec-code/3.1.3.6; BioCyc: http://identifiers.org/biocyc/META:RXN-14126; MetaNetX (MNX) Equation: http://identifiers.org/metanetx.reaction/MNXR94935; KEGG Reaction: http://identifiers.org/kegg.reaction/R…	0.25	0.4	0.5	0.107143	0.138889	0.111111	0.0526316	0.0978261	0.15	0.302174	0.361111
R_ACGAptspp	'N-Acetyl-D-glucosamine transport via PEP:Pyr PTS (periplasm)'	pep_c + acgam_p <-> acgam6p_c + pyr_c	MetaNetX (MNX) Equation: http://identifiers.org/metanetx.reaction/MNXR95253; SEED Reaction: http://identifiers.org/seed.reaction/rxn05485; SEED Reaction: http://identifiers.org/seed.reaction/rxn08041	0.125	0.1	0	0	0.0277778	0	0	0	-0.025	0.1	-0.0277778
R_ASCBptspp	'L-ascorbate transport via PEP:Pyr PTS (periplasm)'	pep_c + ascb__L_p <-> ascb6p_c + pyr_c	MetaNetX (MNX) Equation: http://identifiers.org/metanetx.reaction/MNXR138069; SEED Reaction: http://identifiers.org/seed.reaction/rxn08158; SEED Reaction: http://identifiers.org/seed.reaction/rxn13758	0.125	0.1	0	0	0.0277778	0	0	0	-0.025	0.1	-0.0277778
R_DARBabcpp	'D-arabinose transport via ABC system (periplasm)'	h2o_c + atp_c + arab__D_p <-> h_c + adp_c + pi_c + arab__D_c	MetaNetX (MNX) Equation: http://identifiers.org/metanetx.reaction/MNXR95934; SEED Reaction: http://identifiers.org/seed.reaction/rxn10822	0.125	0.1	0.166667	0	0.0277778	0	0	0	-0.025	0.1	0.138889
R_FLVRx	'Flavin reductase (NAD)'	h_c + nadh_c + ribflv_c <-> nad_c + rbflvrd_c	EC Number: http://identifiers.org/ec-code/1.5.1.36; EC Number: http://identifiers.org/ec-code/1.5.1.41; RHEA: http://identifiers.org/rhea/31455; RHEA: http://identifiers.org/rhea/31456; RHEA: http://identifiers.org/rhea/31457; RHEA: http://identifiers.org/rhea/31458; MetaNetX (MNX) Equation: http://identifiers.org/metanetx.reaction/MNXR99602; KEGG Reaction: http://identifiers.org/kegg.reaction/R0…	0.25	0.2	0.166667	0.0714286	0.111111	0.0666667	0.105263	0.076087	-0.05	0.123913	0.0555556
R_GLCptspp	'D-glucose transport via PEP:Pyr PTS (periplasm)'	pep_c + glc__D_p <-> g6p_c + pyr_c	MetaNetX (MNX) Equation: http://identifiers.org/metanetx.reaction/MNXR100237; SEED Reaction: http://identifiers.org/seed.reaction/rxn05226; SEED Reaction: http://identifiers.org/seed.reaction/rxn08612	0.125	0.1	0	0	0.0277778	0	0	0	-0.025	0.1	-0.0277778
R_GLYBabc	'Glycine betaine transport via ABC system'	atp_c + glyb_e + h2o_c <-> adp_c + glyb_c + h_c + pi_c	RHEA: http://identifiers.org/rhea/32783#1; RHEA: http://identifiers.org/rhea/32784#1; RHEA: http://identifiers.org/rhea/32785#1; RHEA: http://identifiers.org/rhea/32786#1; BioCyc: http://identifiers.org/biocyc/META:TRANS-RXN-283; MetaNetX (MNX) Equation: http://identifiers.org/metanetx.reaction/MNXR100314; SEED Reaction: http://identifiers.org/seed.reaction/rxn05181; SEED Reaction: http://identif…	0.25	0	0	0.0714286	0.111111	0.333333	0.105263	0.206522	-0.25	-0.206522	-0.111111
R_METSR_R1	'L methionine R oxide reductase trdrd'	metox__R_c + trdrd_c <-> h2o_c + met__L_c + trdox_c	MetaNetX (MNX) Equation: http://identifiers.org/metanetx.reaction/MNXR101485; SEED Reaction: http://identifiers.org/seed.reaction/rxn09940	0.125	0.3	0.5	0	0.0277778	0.0222222	0.0526316	0.0217391	0.175	0.278261	0.472222
R_METSR_R2	'L methionine R oxide H2O2'	h2o2_c + met__L_c <-> h2o_c + metox__R_c	MetaNetX (MNX) Equation: http://identifiers.org/metanetx.reaction/MNXR101486; SEED Reaction: http://identifiers.org/seed.reaction/rxn09941	0.125	0.3	0.5	0	0.0277778	0.0222222	0.0526316	0.0217391	0.175	0.278261	0.472222
R_PA160abcpp	'Phosphatidate transport via ABC system (n-C16:0, periplasm)'	atp_c + h2o_c + pa160_c <-> adp_c + h_c + pi_c + pa160_p	MetaNetX (MNX) Equation: http://identifiers.org/metanetx.reaction/MNXR102307; SEED Reaction: http://identifiers.org/seed.reaction/rxn09056	0.75	0.6	0.666667	0.928571	0.888889	0.888889	1	0.923913	-0.15	-0.323913	-0.222222
R_SUCRabcpp_syn	'Sucrose ABC transporter (periplasm)'	atp_c + h2o_c + sucr_p <-> adp_c + h_c + pi_c + sucr_c	MetaNetX (MNX) Equation: http://identifiers.org/metanetx.reaction/MNXR104639	0.25	0	0	0.178571	0.194444	0.133333	0.105263	0.141304	-0.25	-0.141304	-0.194444
R_TRE6PP	'Trehalose-phosphatase'	h2o_c + tre6p_c <-> pi_c + tre_c	RHEA: http://identifiers.org/rhea/23420; RHEA: http://identifiers.org/rhea/23421; RHEA: http://identifiers.org/rhea/23422; RHEA: http://identifiers.org/rhea/23423; EC Number: http://identifiers.org/ec-code/3.1.3.12; BioCyc: http://identifiers.org/biocyc/META:TREHALOSEPHOSPHA-RXN; MetaNetX (MNX) Equation: http://identifiers.org/metanetx.reaction/MNXR104926; Reactome Reaction: http://identifiers.or…	0.125	0	0	0	0.0277778	0	0	0	-0.125	0	-0.0277778
R_BKDC	'BKDC'	2mpdhl_c + coa_c + h_c <-> dhlam_c + ibcoa_c		0.125	0.4	0.333333	0	0.0277778	0	0	0	0.275	0.4	0.305556
R_DHPD	'Dihydropyrimidinase'	56dura_c + h2o_c <-> cala_c	RHEA: http://identifiers.org/rhea/16121; RHEA: http://identifiers.org/rhea/16122; RHEA: http://identifiers.org/rhea/16123; RHEA: http://identifiers.org/rhea/16124; EC Number: http://identifiers.org/ec-code/3.5.2.2; BioCyc: http://identifiers.org/biocyc/META:DIHYDROPYRIMIDINASE-RXN; MetaNetX (MNX) Equation: http://identifiers.org/metanetx.reaction/MNXR97432; Reactome Reaction: http://identifiers.o…	0	0.2	0.333333	0.0714286	0.0555556	0	0	0.0217391	0.2	0.178261	0.277778
R_FRUpts2	'Fructose transport via PEP:Pyr PTS (f6p generating)'	fru_e + pep_c <-> f6p_c + pyr_c	MetaNetX (MNX) Equation: http://identifiers.org/metanetx.reaction/MNXR99662	0	0.3	0.333333	0	0	0	0	0	0.3	0.3	0.333333
R_GLCRt2r	'D-glucarate transport via proton symport, reversible'	glcr_e + h_e <-> glcr_c + h_c	MetaNetX (MNX) Equation: http://identifiers.org/metanetx.reaction/MNXR100221; SEED Reaction: http://identifiers.org/seed.reaction/rxn05572; SEED Reaction: http://identifiers.org/seed.reaction/rxn08613	0	0.1	0.166667	0	0	0	0	0	0.1	0.1	0.166667
R_GLCt2	'D-glucose transport in via proton symport'	glc__D_e + h_e <-> h_c + glc__D_c	BioCyc: http://identifiers.org/biocyc/META:RXN0-7077; MetaNetX (MNX) Equation: http://identifiers.org/metanetx.reaction/MNXR100238; SEED Reaction: http://identifiers.org/seed.reaction/rxn05573; SEED Reaction: http://identifiers.org/seed.reaction/rxn08616	0	0.3	0.5	0	0	0	0	0	0.3	0.3	0.5
R_GLYC2Pabcpp	'Sn-Glycerol 2-phosphate transport via ABC system (periplasm)'	atp_c + h2o_c + glyc2p_p <-> adp_c + glyc2p_c + h_c + pi_c	RHEA: http://identifiers.org/rhea/34759#1; RHEA: http://identifiers.org/rhea/34760#1; RHEA: http://identifiers.org/rhea/34761#1; RHEA: http://identifiers.org/rhea/34762#1; MetaNetX (MNX) Equation: http://identifiers.org/metanetx.reaction/MNXR100318	0	0.1	0.166667	0.0357143	0.0277778	0.0444444	0.0526316	0.0434783	0.1	0.0565217	0.138889
R_GLYC3Pabc	'Sn-Glycerol 3-phosphate transport via ABC system'	atp_c + glyc3p_e + h2o_c <-> adp_c + glyc3p_c + h_c + pi_c	RHEA: http://identifiers.org/rhea/21668#1; RHEA: http://identifiers.org/rhea/21669#1; RHEA: http://identifiers.org/rhea/21670#1; RHEA: http://identifiers.org/rhea/21671#1; EC Number: http://identifiers.org/ec-code/3.6.3.20; BioCyc: http://identifiers.org/biocyc/META:3.6.3.20-RXN; BioCyc: http://identifiers.org/biocyc/META:ABC-34-RXN; MetaNetX (MNX) Equation: http://identifiers.org/metanetx.reacti…	0.125	0.3	0.5	0	0.0277778	0	0	0	0.175	0.3	0.472222
R_LCTSabc	'Lactose transport via ABC system (import)'	lcts_e + atp_c + h2o_c <-> adp_c + h_c + pi_c + lcts_c	MetaNetX (MNX) Equation: http://identifiers.org/metanetx.reaction/MNXR101024; SEED Reaction: http://identifiers.org/seed.reaction/rxn05598	0.75	0.6	0.833333	0.928571	0.888889	0.955556	0.947368	0.945652	-0.15	-0.345652	-0.0555556
R_MG2tpp	'Magnesium (+2) transport in via diffusion'	mg2_p <-> mg2_c	RHEA: http://identifiers.org/rhea/29827; RHEA: http://identifiers.org/rhea/29828; RHEA: http://identifiers.org/rhea/29829; RHEA: http://identifiers.org/rhea/29830; BioCyc: http://identifiers.org/biocyc/META:TRANS-RXN-141; MetaNetX (MNX) Equation: http://identifiers.org/metanetx.reaction/MNXR101507; Reactome Reaction: http://identifiers.org/reactome/R-ATH-5336453; Reactome Reaction: http://identif…	0	0.1	0.166667	0	0	0	0	0	0.1	0.1	0.166667
R_NADDP	'NAD diphosphatase'	h2o_c + nad_c <-> amp_c + 2.0 h_c + nmn_c	RHEA: http://identifiers.org/rhea/11800; RHEA: http://identifiers.org/rhea/11801; RHEA: http://identifiers.org/rhea/11802; RHEA: http://identifiers.org/rhea/11803; EC Number: http://identifiers.org/ec-code/3.6.1.22; EC Number: http://identifiers.org/ec-code/3.6.1.9; BioCyc: http://identifiers.org/biocyc/META:NADPYROPHOSPHAT-RXN; MetaNetX (MNX) Equation: http://identifiers.org/metanetx.reaction/MN…	0.125	0.2	0.166667	0	0.0277778	0	0.0526316	0.0108696	0.075	0.18913	0.138889
R_NAt	'Sodium transport (uniport)'	na1_e <-> na1_c	RHEA: http://identifiers.org/rhea/34963; RHEA: http://identifiers.org/rhea/34964; RHEA: http://identifiers.org/rhea/34965; RHEA: http://identifiers.org/rhea/34966; BioCyc: http://identifiers.org/biocyc/META:TRANS-RXN-189; MetaNetX (MNX) Equation: http://identifiers.org/metanetx.reaction/MNXR101804; Reactome Reaction: http://identifiers.org/reactome/R-BTA-2671885; Reactome Reaction: http://identif…	0	0.3	0.5	0	0	0.0666667	0	0.0326087	0.3	0.267391	0.5
R_PPM2_2	''	d2rib1p_c <-> 2dr5p_c + 2.0 h_c		0	0.1	0.166667	0	0	0	0	0	0.1	0.1	0.166667
R_PSP_L	'Phosphoserine phosphatase (L-serine)'	h2o_c + pser__L_c <-> pi_c + ser__L_c	RHEA: http://identifiers.org/rhea/21208; RHEA: http://identifiers.org/rhea/21209; RHEA: http://identifiers.org/rhea/21210; RHEA: http://identifiers.org/rhea/21211; EC Number: http://identifiers.org/ec-code/3.1.3.3; BioCyc: http://identifiers.org/biocyc/META:RXN0-5114; MetaNetX (MNX) Equation: http://identifiers.org/metanetx.reaction/MNXR103260; Reactome Reaction: http://identifiers.org/reactome/R…	0	0.2	0.333333	0	0	0	0	0	0.2	0.2	0.333333
R_UREAt	'Urea transport via facilitate diffusion'	urea_e <-> urea_c	RHEA: http://identifiers.org/rhea/32799; RHEA: http://identifiers.org/rhea/32800; RHEA: http://identifiers.org/rhea/32801; RHEA: http://identifiers.org/rhea/32802; BioCyc: http://identifiers.org/biocyc/META:TRANS-RXN0-460; MetaNetX (MNX) Equation: http://identifiers.org/metanetx.reaction/MNXR105156; Reactome Reaction: http://identifiers.org/reactome/R-BTA-444126; Reactome Reaction: http://identif…	0	0.3	0.5	0	0	0.111111	0	0.0543478	0.3	0.245652	0.5
R_AP3S	''	adp_c + atp_c + 4.0 h_c <-> p1p3b5adtp_c + ppi_c		0	0.1	0.166667	0	0	0	0	0	0.1	0.1	0.166667
R_COBALT2abcpp	'Cobalt (Co+2) ABC transporter (periplasm)'	atp_c + cobalt2_c + h2o_c <-> adp_c + h_c + pi_c + cobalt2_p	RHEA: http://identifiers.org/rhea/32779#2; RHEA: http://identifiers.org/rhea/32780#2; RHEA: http://identifiers.org/rhea/32781#2; RHEA: http://identifiers.org/rhea/32782#2; MetaNetX (MNX) Equation: http://identifiers.org/metanetx.reaction/MNXR96819; SEED Reaction: http://identifiers.org/seed.reaction/rxn08239	0	0.2	0.333333	0	0	0	0	0	0.2	0.2	0.333333
R_Cobalt2abcppI	'Cobalt II transport via ABC system periplasm I'	h2o_c + atp_c + cobalt2_p <-> adp_c + pi_c + h_c + cobalt2_c	RHEA: http://identifiers.org/rhea/32779#1; RHEA: http://identifiers.org/rhea/32780#1; RHEA: http://identifiers.org/rhea/32781#1; RHEA: http://identifiers.org/rhea/32782#1; MetaNetX (MNX) Equation: http://identifiers.org/metanetx.reaction/MNXR96862; SEED Reaction: http://identifiers.org/seed.reaction/rxn05166	0.125	0.2	0.333333	0.0714286	0.0833333	0.0666667	0.210526	0.0978261	0.075	0.102174	0.25
R_GCCa	'Glycine-cleavage complex'	gly_c + h_c + lpro_c <-> alpro_c + co2_c	EC Number: http://identifiers.org/ec-code/1.4.4.2; MetaNetX (MNX) Equation: http://identifiers.org/metanetx.reaction/MNXR100067; KEGG Reaction: http://identifiers.org/kegg.reaction/R03425; SEED Reaction: http://identifiers.org/seed.reaction/rxn06377	1	1	1	1	1	1	1	1	0	0	0
R_GLYBabcpp	'Glycine betaine transport via ABC system (periplasm)'	atp_c + h2o_c + glyb_p <-> adp_c + glyb_c + h_c + pi_c	RHEA: http://identifiers.org/rhea/32783#1; RHEA: http://identifiers.org/rhea/32784#1; RHEA: http://identifiers.org/rhea/32785#1; RHEA: http://identifiers.org/rhea/32786#1; BioCyc: http://identifiers.org/biocyc/META:TRANS-RXN-283; MetaNetX (MNX) Equation: http://identifiers.org/metanetx.reaction/MNXR100314; SEED Reaction: http://identifiers.org/seed.reaction/rxn05181; SEED Reaction: http://identif…	0.125	0.1	0.166667	0.0357143	0.0555556	0.0666667	0.0526316	0.0543478	-0.025	0.0456522	0.111111
R_GLYCL	'Glycine Cleavage System'	gly_c + nad_c + thf_c <-> co2_c + mlthf_c + nadh_c + nh4_c	EC Number: http://identifiers.org/ec-code/1.4.4.2; EC Number: http://identifiers.org/ec-code/1.8.1.4; EC Number: http://identifiers.org/ec-code/2.1.2.10; RHEA: http://identifiers.org/rhea/27758; RHEA: http://identifiers.org/rhea/27759; RHEA: http://identifiers.org/rhea/27760; RHEA: http://identifiers.org/rhea/27761; MetaNetX (MNX) Equation: http://identifiers.org/metanetx.reaction/MNXR100330; KEG…	0	0.1	0.166667	0	0	0.0222222	0.0526316	0.0217391	0.1	0.0782609	0.166667
R_IT6PT	''	itp_c + tag6p__D_c <-> h_c + idp_c + tagdp__D_c		0	0.1	0.166667	0	0	0	0	0	0.1	0.1	0.166667
R_PGP161abcpp	'Phosphatidylglycerophosphate transport via ABC system (n-C16:1, periplasm)'	atp_c + h2o_c + pgp161_c <-> adp_c + h_c + pi_c + pgp161_p	MetaNetX (MNX) Equation: http://identifiers.org/metanetx.reaction/MNXR102554; SEED Reaction: http://identifiers.org/seed.reaction/rxn09098	0	0.2	0.166667	0.0357143	0.0277778	0.0222222	0.0526316	0.0326087	0.2	0.167391	0.138889
R_TSULabc	'Thiosulfate transport via ABC system'	tsul_e + atp_c + h2o_c <-> adp_c + h_c + tsul_c + pi_c	RHEA: http://identifiers.org/rhea/29871#1; RHEA: http://identifiers.org/rhea/29872#1; RHEA: http://identifiers.org/rhea/29873#1; RHEA: http://identifiers.org/rhea/29874#1; EC Number: http://identifiers.org/ec-code/3.6.3.25; BioCyc: http://identifiers.org/biocyc/META:ABC-7-RXN; MetaNetX (MNX) Equation: http://identifiers.org/metanetx.reaction/MNXR104964; SEED Reaction: http://identifiers.org/seed.…	0.125	0.2	0.333333	0	0.0277778	0	0	0	0.075	0.2	0.305556
R_ACALDtpp	'Acetaldehyde reversible transport (periplasm)'	acald_p <-> acald_c	MetaNetX (MNX) Equation: http://identifiers.org/metanetx.reaction/MNXR95212; Reactome Reaction: http://identifiers.org/reactome/R-HSA-449872; SEED Reaction: http://identifiers.org/seed.reaction/rxn08032; SEED Reaction: http://identifiers.org/seed.reaction/rxn08033; SEED Reaction: http://identifiers.org/seed.reaction/rxn09700; SEED Reaction: http://identifiers.org/seed.reaction/rxn13212	0	0.1	0.166667	0	0	0	0	0	0.1	0.1	0.166667
R_H2CO3D2	'Carboxylic acid dissociation'	h_c + hco3_c <-> h2co3_c	MetaNetX (MNX) Equation: http://identifiers.org/metanetx.reaction/MNXR138494	0.125	0.3	0.333333	0.142857	0.138889	0.2	0.157895	0.173913	0.175	0.126087	0.194444
R_THMabcpp	'Thiamine transport via ABC system (periplasm)'	atp_c + h2o_c + thm_p <-> adp_c + h_c + pi_c + thm_c	MetaNetX (MNX) Equation: http://identifiers.org/metanetx.reaction/MNXR138862; SEED Reaction: http://identifiers.org/seed.reaction/rxn05177; SEED Reaction: http://identifiers.org/seed.reaction/rxn09297	0.125	0.3	0.333333	0.0357143	0.0555556	0	0	0.0108696	0.175	0.28913	0.277778
R_TREP	''	pi_c + tre_c <-> g1p_c + glc__D_c		0	0.1	0.166667	0	0	0	0	0	0.1	0.1	0.166667
R_UUPP	'ITP cytidine 5''-phosphotransferase'	cytd_c + itp_c <-> cmp_c + idp_c		0	0.1	0.166667	0	0	0	0	0	0.1	0.1	0.166667
R_2INSD	'2-Inosose dehydratase'	2ins_c <-> dkdi_c + h2o_c	RHEA: http://identifiers.org/rhea/14065; RHEA: http://identifiers.org/rhea/14066; RHEA: http://identifiers.org/rhea/14067; RHEA: http://identifiers.org/rhea/14068; EC Number: http://identifiers.org/ec-code/4.2.1.44; BioCyc: http://identifiers.org/biocyc/META:MYO-INOSOSE-2-DEHYDRATASE-RXN; MetaNetX (MNX) Equation: http://identifiers.org/metanetx.reaction/MNXR137940; KEGG Reaction: http://identifie…	0.125	0.1	0	0.107143	0.111111	0.0222222	0.105263	0.0652174	-0.025	0.0347826	-0.111111
R_AGPAT141	'1-tetradec-7-enoyl-sn-glycerol 3-phosphate O-acyltransferase (n-C14:1)'	1tdec7eg3p_c + tdeACP_c <-> ACP_c + pa141_c	EC Number: http://identifiers.org/ec-code/2.3.1.51; MetaNetX (MNX) Equation: http://identifiers.org/metanetx.reaction/MNXR95560	0.625	0.4	0.333333	0.892857	0.833333	0.822222	0.894737	0.858696	-0.225	-0.458696	-0.5
R_AKGDb	'Oxoglutarate dehydrogenase (dihydrolipoamide S-succinyltransferase)'	coa_c + sdhlam_c <-> dhlam_c + succoa_c	EC Number: http://identifiers.org/ec-code/2.3.1.61; MetaNetX (MNX) Equation: http://identifiers.org/metanetx.reaction/MNXR95656; SEED Reaction: http://identifiers.org/seed.reaction/rxn01872	0	0.1	0	0	0	0	0	0	0.1	0.1	0
R_BKDC1	'S-2-methylbutanoyl-CoA enzyme N6-dihydrolipoyllysine'	2mbdhl_c + coa_c <-> 2mbcoa_c + dhlam_c		0	0.1	0	0	0	0	0	0	0.1	0.1	0
R_BZt	'Benzoate transport (diffusion)'	bz_e <-> bz_c	RHEA: http://identifiers.org/rhea/32811; RHEA: http://identifiers.org/rhea/32812; RHEA: http://identifiers.org/rhea/32813; RHEA: http://identifiers.org/rhea/32814; MetaNetX (MNX) Equation: http://identifiers.org/metanetx.reaction/MNXR96370; SEED Reaction: http://identifiers.org/seed.reaction/rxn12436	0	0.1	0	0.0357143	0.0277778	0.0444444	0	0.0326087	0.1	0.0673913	-0.0277778
R_CLPNS180pp	'Cardiolipin synthase (periplasmic, n-C18:0)'	2.0 pg180_p <-> clpn180_p + glyc_p	MetaNetX (MNX) Equation: http://identifiers.org/metanetx.reaction/MNXR96787	0	0.1	0	0	0	0	0	0	0.1	0.1	0
R_DKDID	'D-2,3-Diketo 4-deoxy-epi-inositol dehydratase'	dkdi_c + h2o_c <-> h_c + d5kg_c	EC Number: http://identifiers.org/ec-code/3.7.1; BioCyc: http://identifiers.org/biocyc/META:R503-RXN; MetaNetX (MNX) Equation: http://identifiers.org/metanetx.reaction/MNXR138244; SEED Reaction: http://identifiers.org/seed.reaction/rxn03931	0.125	0.1	0	0.107143	0.111111	0.0222222	0.105263	0.0652174	-0.025	0.0347826	-0.111111
R_GPDDA1_1	'Glycerophosphodiester phosphodiesterase (Glycerophosphocholine)'	g3pc_e + h2o_e <-> chol_e + glyc3p_e + h_e		0	0.1	0	0	0	0.0222222	0	0.0108696	0.1	0.0891304	0
R_GPDDA2_1	'Glycerophosphodiester phosphodiesterase (Glycerophosphoethanolamine)'	g3pg_e + h2o_e <-> glyc3p_e + glyc_e + h_e		0	0.1	0	0	0	0.0222222	0	0.0108696	0.1	0.0891304	0
R_GPDDA3_1	'Glycerophosphodiester phosphodiesterase (Glycerophosphoserine)'	g3ps_e + h2o_e <-> glyc3p_e + h_e + ser__L_e		0	0.1	0	0	0	0.0222222	0	0.0108696	0.1	0.0891304	0
R_GPDDA4_1	'Glycerophosphodiester phosphodiesterase (Glycerophosphoglycerol)'	g3pg_e + h2o_c <-> glyc3p_c + glyc_c + h_c		0	0.1	0	0	0	0.0222222	0	0.0108696	0.1	0.0891304	0
R_INOSR	'Ketoinositol reductase'	nadp_c + inost_c <-> h_c + nadph_c + 2ins_c	MetaNetX (MNX) Equation: http://identifiers.org/metanetx.reaction/MNXR100838	0.125	0.1	0	0.107143	0.111111	0.0222222	0.105263	0.0652174	-0.025	0.0347826	-0.111111
R_INSCR	'Inositol catabolic reactions lumped'	2ins_c + atp_c <-> adp_c + dhap_c + 2.0 h_c + msa_c	MetaNetX (MNX) Equation: http://identifiers.org/metanetx.reaction/MNXR100843; SEED Reaction: http://identifiers.org/seed.reaction/rxn05743	0.125	0.1	0	0.107143	0.111111	0.0222222	0.105263	0.0652174	-0.025	0.0347826	-0.111111
R_MMSAD1	'Methylmalonate semialdehyde dehydrogenase'	2mop_c + coa_c + nad_c <-> co2_c + ppcoa_c + nadh_c	EC Number: http://identifiers.org/ec-code/1.2.1.27; MetaNetX (MNX) Equation: http://identifiers.org/metanetx.reaction/MNXR101662; Reactome Reaction: http://identifiers.org/reactome/R-ATH-70893; Reactome Reaction: http://identifiers.org/reactome/R-BTA-70893; Reactome Reaction: http://identifiers.org/reactome/R-CEL-70893; Reactome Reaction: http://identifiers.org/reactome/R-CFA-70893; Reactome Reac…	0.125	0.1	0	0.107143	0.111111	0.0222222	0.105263	0.0652174	-0.025	0.0347826	-0.111111
R_MMSAD2	'Methylmalonate-semialdehyde dehydrogenase (propanol)'	nad_c + coa_c + ppal_c <-> ppcoa_c + h_c + nadh_c	EC Number: http://identifiers.org/ec-code/1.2.1.87; RHEA: http://identifiers.org/rhea/36027; RHEA: http://identifiers.org/rhea/36028; RHEA: http://identifiers.org/rhea/36029; RHEA: http://identifiers.org/rhea/36030; BioCyc: http://identifiers.org/biocyc/META:RXN-12736; MetaNetX (MNX) Equation: http://identifiers.org/metanetx.reaction/MNXR101664; KEGG Reaction: http://identifiers.org/kegg.reaction…	0.125	0.1	0	0.142857	0.138889	0.0222222	0.105263	0.076087	-0.025	0.023913	-0.138889
R_MMSAD3	'Methylmalonate-semialdehyde dehydrogenase (malonic semialdehyde)'	msa_c + coa_c + nad_c <-> accoa_c + nadh_c + co2_c	EC Number: http://identifiers.org/ec-code/1.2.1; EC Number: http://identifiers.org/ec-code/1.2.1.18; EC Number: http://identifiers.org/ec-code/1.2.1.27; RHEA: http://identifiers.org/rhea/22992; RHEA: http://identifiers.org/rhea/22993; RHEA: http://identifiers.org/rhea/22994; RHEA: http://identifiers.org/rhea/22995; BioCyc: http://identifiers.org/biocyc/META:RXN-2902; MetaNetX (MNX) Equation: http…	0.125	0.1	0	0.107143	0.111111	0.0222222	0.105263	0.0652174	-0.025	0.0347826	-0.111111
R_MMSDHir	'Methylmalonate semialdehyde dehydrogenase acylating'	coa_c + mmalsa__S_c + nad_c <-> co2_c + nadh_c + ppcoa_c	MetaNetX (MNX) Equation: http://identifiers.org/metanetx.reaction/MNXR101667	0.125	0.1	0	0	0.0277778	0.0222222	0.0526316	0.0217391	-0.025	0.0782609	-0.0277778
R_MMTSAO	'(S)-Methylmalonate semialdehyde:NAD+ oxidoreductase (CoA-propanoylating)'	mmtsa_c + coa_c + nad_c <-> ppcoa_c + co2_c + nadh_c	EC Number: http://identifiers.org/ec-code/1.2.1.27; RHEA: http://identifiers.org/rhea/31047; RHEA: http://identifiers.org/rhea/31048; RHEA: http://identifiers.org/rhea/31049; RHEA: http://identifiers.org/rhea/31050; MetaNetX (MNX) Equation: http://identifiers.org/metanetx.reaction/MNXR101666; KEGG Reaction: http://identifiers.org/kegg.reaction/R00935	0.125	0.1	0	0.107143	0.111111	0.0222222	0.105263	0.0652174	-0.025	0.0347826	-0.111111
R_PA120abcpp	'Phosphatidate transport via ABC system (n-C12:0, periplasm)'	atp_c + h2o_c + pa120_c <-> adp_c + h_c + pi_c + pa120_p	MetaNetX (MNX) Equation: http://identifiers.org/metanetx.reaction/MNXR102304; SEED Reaction: http://identifiers.org/seed.reaction/rxn09053	0.125	0.1	0	0.0357143	0.0555556	0.0666667	0.0526316	0.0543478	-0.025	0.0456522	-0.0555556
R_PA140abcpp	'Phosphatidate transport via ABC system (n-C14:0, periplasm)'	atp_c + h2o_c + pa140_c <-> adp_c + h_c + pi_c + pa140_p	MetaNetX (MNX) Equation: http://identifiers.org/metanetx.reaction/MNXR102305; SEED Reaction: http://identifiers.org/seed.reaction/rxn09054	0.125	0.1	0	0.0357143	0.0555556	0.0666667	0.0526316	0.0543478	-0.025	0.0456522	-0.0555556
R_PA181abcpp	'Phosphatidate transport via ABC system (n-C18:1, periplasm)'	atp_c + h2o_c + pa181_c <-> adp_c + h_c + pi_c + pa181_p	MetaNetX (MNX) Equation: http://identifiers.org/metanetx.reaction/MNXR102310; SEED Reaction: http://identifiers.org/seed.reaction/rxn09059	0.125	0.1	0	0.0357143	0.0555556	0.0666667	0.0526316	0.0543478	-0.025	0.0456522	-0.0555556
R_PDHa	'Pyruvate dehydrogenase (lipoamide)'	pyr_c + lpam_c + h_c <-> co2_c + adhlam_c	EC Number: http://identifiers.org/ec-code/1.2.4.1; MetaNetX (MNX) Equation: http://identifiers.org/metanetx.reaction/MNXR102427; SEED Reaction: http://identifiers.org/seed.reaction/rxn01242	0	0.2	0	0	0	0	0	0	0.2	0.2	0
R_PPNDH2	''	fad_c + ppcoa_c <-> fadh2_c + prpncoa_c		0.25	0.2	0.166667	0.142857	0.166667	0.0222222	0.157895	0.0869565	-0.05	0.113043	0
R_2MAHMP	'2-Methyl-4-amino-5-hydroxymethylpyrimidine diphosphatase'	2mahmp_c + h2o_c <-> 4ampm_c + h_c + pi_c	MetaNetX (MNX) Equation: http://identifiers.org/metanetx.reaction/MNXR142616; SEED Reaction: http://identifiers.org/seed.reaction/rxn07971	0.125	0	0	0.0357143	0.0555556	0.0666667	0.0526316	0.0543478	-0.125	-0.0543478	-0.0555556
R_AACPS9	'Acyl-[acyl-carrier-protein] synthetase (n-C8:0)'	ACP_c + atp_c + octa_c <-> amp_c + ocACP_c + ppi_c	EC Number: http://identifiers.org/ec-code/6.2.1.l; MetaNetX (MNX) Equation: http://identifiers.org/metanetx.reaction/MNXR95148	0.125	0	0	0	0.0277778	0.0666667	0.0526316	0.0434783	-0.125	-0.0434783	-0.0277778
R_BKDA2	'BKDA2'	3mob_c + lpam_c <-> 2mpdhl_c + co2_c		0.125	0.1	0.166667	0.0357143	0.0555556	0.0222222	0	0.0217391	-0.025	0.0782609	0.111111
R_CHOLSabc_1	'Choline sulfate transport in via ABC system'	atp_c + h2o_c + chols_e <-> adp_c + chols_c + h_c + pi_c	MetaNetX (MNX) Equation: http://identifiers.org/metanetx.reaction/MNXR96706; SEED Reaction: http://identifiers.org/seed.reaction/rxn05184; SEED Reaction: http://identifiers.org/seed.reaction/rxn12738	0.125	0	0	0.0357143	0.0555556	0.0444444	0.0526316	0.0434783	-0.125	-0.0434783	-0.0555556
R_CRNabc	'L-carnitine transport via ABC system'	atp_c + crn_e + h2o_c <-> adp_c + crn_c + h_c + pi_c	RHEA: http://identifiers.org/rhea/38719#1; RHEA: http://identifiers.org/rhea/38720#1; RHEA: http://identifiers.org/rhea/38721#1; RHEA: http://identifiers.org/rhea/38722#1; MetaNetX (MNX) Equation: http://identifiers.org/metanetx.reaction/MNXR96905; SEED Reaction: http://identifiers.org/seed.reaction/rxn05180; SEED Reaction: http://identifiers.org/seed.reaction/rxn08253	0.125	0	0	0.0357143	0.0555556	0.0444444	0.0526316	0.0434783	-0.125	-0.0434783	-0.0555556
R_CRNabcpp	'L-carnitine transport via ABC system (periplasm)'	atp_c + h2o_c + crn_p <-> adp_c + crn_c + h_c + pi_c	RHEA: http://identifiers.org/rhea/38719#1; RHEA: http://identifiers.org/rhea/38720#1; RHEA: http://identifiers.org/rhea/38721#1; RHEA: http://identifiers.org/rhea/38722#1; MetaNetX (MNX) Equation: http://identifiers.org/metanetx.reaction/MNXR96905; SEED Reaction: http://identifiers.org/seed.reaction/rxn05180; SEED Reaction: http://identifiers.org/seed.reaction/rxn08253	0.125	0	0	0.0357143	0.0555556	0.0444444	0.0526316	0.0434783	-0.125	-0.0434783	-0.0555556
R_HETZK	'Hydroxyethylthiazole kinase'	4mhetz_c + atp_c <-> 4mpetz_c + adp_c + h_c	EC Number: http://identifiers.org/ec-code/2.7.1.50; RHEA: http://identifiers.org/rhea/24212; RHEA: http://identifiers.org/rhea/24213; RHEA: http://identifiers.org/rhea/24214; RHEA: http://identifiers.org/rhea/24215; BioCyc: http://identifiers.org/biocyc/META:THIAZOLSYN3-RXN; MetaNetX (MNX) Equation: http://identifiers.org/metanetx.reaction/MNXR100611; KEGG Reaction: http://identifiers.org/kegg.re…	0.125	0	0	0.25	0.222222	0.155556	0.157895	0.184783	-0.125	-0.184783	-0.222222
R_HISabcpp	'L-histidine transport via ABC system (periplasm)'	atp_c + h2o_c + his__L_p <-> adp_c + h_c + his__L_c + pi_c	RHEA: http://identifiers.org/rhea/29891#1; RHEA: http://identifiers.org/rhea/29892#1; RHEA: http://identifiers.org/rhea/29893#1; RHEA: http://identifiers.org/rhea/29894#1; EC Number: http://identifiers.org/ec-code/3.6.3.21; BioCyc: http://identifiers.org/biocyc/META:ABC-14-RXN; MetaNetX (MNX) Equation: http://identifiers.org/metanetx.reaction/MNXR100644; SEED Reaction: http://identifiers.org/seed…	0.125	0	0	0.0357143	0.0555556	0.0666667	0.0526316	0.0543478	-0.125	-0.0543478	-0.0555556
R_MALTabcpp	'Maltose transport via ABC system (periplasm)'	atp_c + h2o_c + malt_p <-> adp_c + h_c + malt_c + pi_c	RHEA: http://identifiers.org/rhea/22132#1; RHEA: http://identifiers.org/rhea/22133#1; RHEA: http://identifiers.org/rhea/22134#1; RHEA: http://identifiers.org/rhea/22135#1; EC Number: http://identifiers.org/ec-code/3.6.3.19; BioCyc: http://identifiers.org/biocyc/META:3.6.3.19-RXN; BioCyc: http://identifiers.org/biocyc/META:ABC-16-RXN; MetaNetX (MNX) Equation: http://identifiers.org/metanetx.reacti…	0.125	0	0	0.0357143	0.0555556	0.0666667	0.0526316	0.0543478	-0.125	-0.0543478	-0.0555556
R_MTAN	'Methylthioadenosine nucleosidase'	5mta_c + h2o_c <-> 5mtr_c + ade_c	RHEA: http://identifiers.org/rhea/13617; RHEA: http://identifiers.org/rhea/13618; RHEA: http://identifiers.org/rhea/13619; RHEA: http://identifiers.org/rhea/13620; EC Number: http://identifiers.org/ec-code/3.2.2.16; EC Number: http://identifiers.org/ec-code/3.2.2.9; BioCyc: http://identifiers.org/biocyc/META:METHYLTHIOADENOSINE-NUCLEOSIDASE-RXN; MetaNetX (MNX) Equation: http://identifiers.org/met…	0.125	0	0	0.0357143	0.0555556	0.0666667	0.0526316	0.0543478	-0.125	-0.0543478	-0.0555556
R_PE141abcpp	'Phosphatidylethanolamine transport via ABC system (n-C14:1, periplasm)'	atp_c + h2o_c + pe141_c <-> adp_c + h_c + pi_c + pe141_p	MetaNetX (MNX) Equation: http://identifiers.org/metanetx.reaction/MNXR102443	0.125	0	0	0.107143	0.111111	0.133333	0.157895	0.130435	-0.125	-0.130435	-0.111111
R_PE161abcpp	'Phosphatidylethanolamine transport via ABC system (n-C16:1, periplasm)'	atp_c + h2o_c + pe161_c <-> adp_c + h_c + pi_c + pe161_p	MetaNetX (MNX) Equation: http://identifiers.org/metanetx.reaction/MNXR102445	0.375	0.1	0.166667	0.214286	0.25	0.2	0.263158	0.217391	-0.275	-0.117391	-0.0833333
R_PGMT_B	'B phosphoglucomutase'	g6p_B_c <-> g1p_B_c	RHEA: http://identifiers.org/rhea/20113; RHEA: http://identifiers.org/rhea/20114; RHEA: http://identifiers.org/rhea/20115; RHEA: http://identifiers.org/rhea/20116; EC Number: http://identifiers.org/ec-code/5.4.2.6; BioCyc: http://identifiers.org/biocyc/META:BETA-PHOSPHOGLUCOMUTASE-RXN; MetaNetX (MNX) Equation: http://identifiers.org/metanetx.reaction/MNXR102549; KEGG Reaction: http://identifiers.…	0.5	0.2	0.166667	0.0714286	0.166667	0.133333	0.157895	0.119565	-0.3	0.0804348	0
R_PPPGO	'Protoporphyrinogen oxidase (aerobic)'	1.5 o2_c + pppg9_c <-> 3.0 h2o_c + ppp9_c	EC Number: http://identifiers.org/ec-code/1.3.3.4; MetaNetX (MNX) Equation: http://identifiers.org/metanetx.reaction/MNXR103128; Reactome Reaction: http://identifiers.org/reactome/R-GGA-421452; SEED Reaction: http://identifiers.org/seed.reaction/rxn02304; SEED Reaction: http://identifiers.org/seed.reaction/rxn09179	0.125	0	0	0.0357143	0.0555556	0.0666667	0.0526316	0.0543478	-0.125	-0.0543478	-0.0555556
R_PROabcpp	'L-proline transport via ABC system (periplasm)'	atp_c + h2o_c + pro__L_p <-> adp_c + h_c + pi_c + pro__L_c	RHEA: http://identifiers.org/rhea/29815#1; RHEA: http://identifiers.org/rhea/29816#1; RHEA: http://identifiers.org/rhea/29817#1; RHEA: http://identifiers.org/rhea/29818#1; BioCyc: http://identifiers.org/biocyc/META:ABC-26-RXN; MetaNetX (MNX) Equation: http://identifiers.org/metanetx.reaction/MNXR103210; SEED Reaction: http://identifiers.org/seed.reaction/rxn05165; SEED Reaction: http://identifier…	0.125	0	0	0.0357143	0.0555556	0.0444444	0.0526316	0.0434783	-0.125	-0.0434783	-0.0555556
R_SELabcpp	'Selenatenate transport via ABC system (periplasm)'	h2o_c + atp_c + sel_p <-> sel_c + h_c + adp_c + pi_c		0.125	0	0	0.0357143	0.0555556	0.0666667	0.0526316	0.0543478	-0.125	-0.0543478	-0.0555556
R_SULabcpp	'Sulfate transport via ABC system (periplasm)'	atp_c + h2o_c + so4_p <-> adp_c + h_c + pi_c + so4_c	RHEA: http://identifiers.org/rhea/10192#1; RHEA: http://identifiers.org/rhea/10193#1; RHEA: http://identifiers.org/rhea/10194#1; RHEA: http://identifiers.org/rhea/10195#1; EC Number: http://identifiers.org/ec-code/3.6.3.25; BioCyc: http://identifiers.org/biocyc/META:3.6.3.25-RXN; BioCyc: http://identifiers.org/biocyc/META:ABC-70-RXN; MetaNetX (MNX) Equation: http://identifiers.org/metanetx.reacti…	0.125	0	0	0.0357143	0.0555556	0.0666667	0.0526316	0.0543478	-0.125	-0.0543478	-0.0555556
R_FE2t	'Iron II transport'	fe2_e <-> fe2_c	RHEA: http://identifiers.org/rhea/28486; RHEA: http://identifiers.org/rhea/28487; RHEA: http://identifiers.org/rhea/28488; RHEA: http://identifiers.org/rhea/28489; BioCyc: http://identifiers.org/biocyc/META:TRANS-RXN-8; MetaNetX (MNX) Equation: http://identifiers.org/metanetx.reaction/MNXR99505; SEED Reaction: http://identifiers.org/seed.reaction/rxn08475; SEED Reaction: http://identifiers.org/se…	0.125	0	0	0	0.0277778	0	0	0	-0.125	0	-0.0277778
R_NDPK1	'Nucleoside-diphosphate kinase (ATP:GDP)'	atp_c + gdp_c <-> adp_c + gtp_c	EC Number: http://identifiers.org/ec-code/2.7.4.6; RHEA: http://identifiers.org/rhea/27686; RHEA: http://identifiers.org/rhea/27687; RHEA: http://identifiers.org/rhea/27688; RHEA: http://identifiers.org/rhea/27689; BioCyc: http://identifiers.org/biocyc/META:GDPKIN-RXN; MetaNetX (MNX) Equation: http://identifiers.org/metanetx.reaction/MNXR96119; KEGG Reaction: http://identifiers.org/kegg.reaction/…	0.125	0.1	0.166667	0	0.0277778	0	0	0	-0.025	0.1	0.138889
R_NDPK3	'Nucleoside-diphosphate kinase (ATP:CDP)'	atp_c + cdp_c <-> adp_c + ctp_c	EC Number: http://identifiers.org/ec-code/2.7.4.6; RHEA: http://identifiers.org/rhea/25237; RHEA: http://identifiers.org/rhea/25238; RHEA: http://identifiers.org/rhea/25239; RHEA: http://identifiers.org/rhea/25240; BioCyc: http://identifiers.org/biocyc/META:CDPKIN-RXN; MetaNetX (MNX) Equation: http://identifiers.org/metanetx.reaction/MNXR101936; KEGG Reaction: http://identifiers.org/kegg.reaction…	0.125	0.1	0.166667	0	0.0277778	0.0222222	0	0.0108696	-0.025	0.0891304	0.138889
R_METSabc	'L methionine S oxide transport via ABC system'	atp_c + h2o_c + metox_e <-> adp_c + h_c + metox_c + pi_c	BioCyc: http://identifiers.org/biocyc/META:TRANS-RXN0-511; MetaNetX (MNX) Equation: http://identifiers.org/metanetx.reaction/MNXR101482; SEED Reaction: http://identifiers.org/seed.reaction/rxn05613; SEED Reaction: http://identifiers.org/seed.reaction/rxn08914	0.75	0.6	0.666667	0.535714	0.583333	0.688889	0.368421	0.576087	-0.15	0.023913	0.0833333
R_CPK1	'Adenylate kinase'	ctp_c + cmp_c <-> 2.0 cdp_c	MetaNetX (MNX) Equation: http://identifiers.org/metanetx.reaction/MNXR96876	0	0.2	0.333333	0	0	0	0	0	0.2	0.2	0.333333
R_CYTK2_1	'Adenylate kinase'	dcmp_c + ctp_c <-> dcdp_c + cdp_c	MetaNetX (MNX) Equation: http://identifiers.org/metanetx.reaction/MNXR97054	0	0.1	0.166667	0	0	0.0222222	0.0526316	0.0217391	0.1	0.0782609	0.166667
R_NDPK2	'Nucleoside-diphosphate kinase (ATP:UDP)'	atp_c + udp_c <-> adp_c + utp_c	EC Number: http://identifiers.org/ec-code/2.7.4.6; RHEA: http://identifiers.org/rhea/25098; RHEA: http://identifiers.org/rhea/25099; RHEA: http://identifiers.org/rhea/25100; RHEA: http://identifiers.org/rhea/25101; BioCyc: http://identifiers.org/biocyc/META:UDPKIN-RXN; MetaNetX (MNX) Equation: http://identifiers.org/metanetx.reaction/MNXR101935; KEGG Reaction: http://identifiers.org/kegg.reaction…	0	0.2	0.333333	0	0	0.0444444	0	0.0217391	0.2	0.178261	0.333333
R_NDPK4	'Nucleoside-diphosphate kinase (ATP:dTDP)'	atp_c + dtdp_c <-> adp_c + dttp_c	EC Number: http://identifiers.org/ec-code/2.7.4.6; RHEA: http://identifiers.org/rhea/27682; RHEA: http://identifiers.org/rhea/27683; RHEA: http://identifiers.org/rhea/27684; RHEA: http://identifiers.org/rhea/27685; BioCyc: http://identifiers.org/biocyc/META:DTDPKIN-RXN; MetaNetX (MNX) Equation: http://identifiers.org/metanetx.reaction/MNXR101937; KEGG Reaction: http://identifiers.org/kegg.reactio…	0.5	0.4	0.666667	0.392857	0.416667	0.333333	0.315789	0.347826	-0.1	0.0521739	0.25
R_NDPK5	'Nucleoside-diphosphate kinase (ATP:dGDP)'	atp_c + dgdp_c <-> adp_c + dgtp_c	EC Number: http://identifiers.org/ec-code/2.7.4.6; RHEA: http://identifiers.org/rhea/27690; RHEA: http://identifiers.org/rhea/27691; RHEA: http://identifiers.org/rhea/27692; RHEA: http://identifiers.org/rhea/27693; BioCyc: http://identifiers.org/biocyc/META:DGDPKIN-RXN; MetaNetX (MNX) Equation: http://identifiers.org/metanetx.reaction/MNXR96118; KEGG Reaction: http://identifiers.org/kegg.reaction…	0.25	0.2	0.166667	0.107143	0.138889	0.133333	0.105263	0.119565	-0.05	0.0804348	0.0277778
R_NDPK6	'Nucleoside-diphosphate kinase (ATP:dUDP)'	atp_c + dudp_c <-> adp_c + dutp_c	EC Number: http://identifiers.org/ec-code/2.7.4.6; RHEA: http://identifiers.org/rhea/28582; RHEA: http://identifiers.org/rhea/28583; RHEA: http://identifiers.org/rhea/28584; RHEA: http://identifiers.org/rhea/28585; BioCyc: http://identifiers.org/biocyc/META:DUDPKIN-RXN; MetaNetX (MNX) Equation: http://identifiers.org/metanetx.reaction/MNXR101938; KEGG Reaction: http://identifiers.org/kegg.reactio…	0.25	0.5	0.666667	0.428571	0.388889	0.533333	0.526316	0.5	0.25	0	0.277778
R_NDPK7	'Nucleoside-diphosphate kinase (ATP:dCDP)'	atp_c + dcdp_c <-> adp_c + dctp_c	EC Number: http://identifiers.org/ec-code/2.7.4.6; RHEA: http://identifiers.org/rhea/27678; RHEA: http://identifiers.org/rhea/27679; RHEA: http://identifiers.org/rhea/27680; RHEA: http://identifiers.org/rhea/27681; BioCyc: http://identifiers.org/biocyc/META:DCDPKIN-RXN; MetaNetX (MNX) Equation: http://identifiers.org/metanetx.reaction/MNXR101939; KEGG Reaction: http://identifiers.org/kegg.reactio…	0.25	0.1	0.166667	0.107143	0.138889	0.155556	0.263158	0.163043	-0.15	-0.0630435	0.0277778
R_NDPK8	'Nucleoside-diphosphate kinase (ATP:dADP)'	atp_c + dadp_c <-> adp_c + datp_c	EC Number: http://identifiers.org/ec-code/2.7.4.6; RHEA: http://identifiers.org/rhea/27674; RHEA: http://identifiers.org/rhea/27675; RHEA: http://identifiers.org/rhea/27676; RHEA: http://identifiers.org/rhea/27677; BioCyc: http://identifiers.org/biocyc/META:DADPKIN-RXN; MetaNetX (MNX) Equation: http://identifiers.org/metanetx.reaction/MNXR101940; KEGG Reaction: http://identifiers.org/kegg.reactio…	0	0.2	0.333333	0	0	0	0	0	0.2	0.2	0.333333
R_ADK2_1	'Adenylate kinase (Inorganic triphosphate)'	amp_c + h_c + pppi_c <-> adp_c + ppi_c		0	0.1	0.166667	0	0	0.0888889	0.105263	0.0652174	0.1	0.0347826	0.166667
R_ALAGLUabcpp	'L Alaninylglutamate LalaLglu transport via ABC system periplasm'	LalaLglu_p + atp_c + h2o_c <-> LalaLglu_c + adp_c + h_c + pi_c		0.25	0.3	0.333333	0	0.0555556	0.0666667	0.0526316	0.0434783	0.05	0.256522	0.277778
R_ALAHISabcpp	'L Alaninylhistidine Ala His transport via ABC system periplasm'	alahis_p + atp_c + h2o_c <-> adp_c + alahis_c + h_c + pi_c		0.25	0.5	0.5	0	0.0555556	0	0	0	0.25	0.5	0.444444
R_ALALEUabcpp	'L Alaninylleucine Ala Leu transport via ABC system periplasm'	alaleu_p + atp_c + h2o_c <-> adp_c + alaleu_c + h_c + pi_c		0.25	0.5	0.5	0	0.0555556	0	0	0	0.25	0.5	0.444444
R_ALATHRabcpp	'L Alaninylthreonine Ala thr transport via ABC system periplasm'	alathr_p + atp_c + h2o_c <-> adp_c + alathr_c + h_c + pi_c		0.25	0.5	0.5	0	0.0555556	0	0	0	0.25	0.5	0.444444
R_ALATRPabcpp	'L Alaninyltryptophan Ala Trp transport via ABC system periplasm'	alatrp_p + atp_c + h2o_c <-> adp_c + alatrp_c + h_c + pi_c		0.25	0.7	0.833333	0	0.0555556	0	0	0	0.45	0.7	0.777778
R_FE3abcpp	'Iron (III) transport via ABC system (periplasm to cytoplasm)'	atp_c + h2o_c + fe3_p <-> adp_c + fe3_c + h_c + pi_c	RHEA: http://identifiers.org/rhea/12332#1; RHEA: http://identifiers.org/rhea/12333#1; RHEA: http://identifiers.org/rhea/12334#1; RHEA: http://identifiers.org/rhea/12335#1; EC Number: http://identifiers.org/ec-code/3.6.3.30; BioCyc: http://identifiers.org/biocyc/META:3.6.3.30-RXN; MetaNetX (MNX) Equation: http://identifiers.org/metanetx.reaction/MNXR99525; SEED Reaction: http://identifiers.org/see…	0	0.1	0.166667	0	0	0	0	0	0.1	0.1	0.166667
R_GLYGLNabcpp	'L Glycinylglutamine Gly Gln transport via ABC system periplasm'	atp_c + glygln_p + h2o_c <-> adp_c + glygln_c + h_c + pi_c		0.25	0.6	0.666667	0	0.0555556	0	0	0	0.35	0.6	0.611111
R_GLYGLUabcpp	'L Glycinylglutamate Gly Glu transport via ABC system periplasm'	atp_c + glyglu_p + h2o_c <-> adp_c + glyglu_c + h_c + pi_c		0.125	0.5	0.5	0	0.0277778	0	0	0	0.375	0.5	0.472222
R_GLYGLYabcpp	'L Glycinilglycine Gly Gly transport via ABC system periplasm'	atp_c + glygly_p + h2o_c <-> adp_c + glygly_c + h_c + pi_c		0	0.1	0.166667	0	0	0	0	0	0.1	0.1	0.166667
R_GLYMETabcpp	'L Glycinylmethionine Gly Met transport via ABC system periplasm'	atp_c + glymet_p + h2o_c <-> adp_c + glymet_c + h_c + pi_c		0.25	0.5	0.5	0	0.0555556	0	0	0	0.25	0.5	0.444444
R_GLYPHEabcpp	'L Glycinilphenylalanin Gly Phe transport via ABC system periplasm'	atp_c + glyphe_p + h2o_c <-> adp_c + glyphe_c + h_c + pi_c		0.25	0.5	0.5	0	0.0555556	0	0	0	0.25	0.5	0.444444
R_GLYSERabcpp	'L Glycinylserine Gly Ser transport via ABC system periplasm'	atp_c + glyser_p + h2o_c <-> adp_c + glyser_c + h_c + pi_c		0.125	0.6	0.666667	0	0.0277778	0	0	0	0.475	0.6	0.638889
R_HISGLYabcpp	'L Histidinylglycine His Gly transport via ABC system periplasm'	atp_c + h2o_c + hisgly_p <-> adp_c + h_c + hisgly_c + pi_c		0.125	0.5	0.5	0	0.0277778	0	0	0	0.375	0.5	0.472222
R_HISHISabcpp	'L Histidinylhistidine His His transport via ABC system periplasm'	atp_c + h2o_c + hishis_p <-> adp_c + h_c + hishis_c + pi_c		0.25	0.6	0.666667	0	0.0555556	0	0	0	0.35	0.6	0.611111
R_LEULEUabcpp	'L leucylleucine leuleu transport via ABC system periplasm'	atp_c + h2o_c + leuleu_p <-> adp_c + h_c + leuleu_c + pi_c		0.25	0.7	0.833333	0.0357143	0.0833333	0	0.0526316	0.0217391	0.45	0.678261	0.75
R_ASPabcpp	'L-aspartate transport via ABC system (periplasm)'	atp_c + h2o_c + asp__L_p <-> adp_c + asp__L_c + h_c + pi_c	RHEA: http://identifiers.org/rhea/29039#1; RHEA: http://identifiers.org/rhea/29040#1; RHEA: http://identifiers.org/rhea/29041#1; RHEA: http://identifiers.org/rhea/29042#1; EC Number: http://identifiers.org/ec-code/3.6.3.21; BioCyc: http://identifiers.org/biocyc/META:TRANS-RXN0-222; MetaNetX (MNX) Equation: http://identifiers.org/metanetx.reaction/MNXR96103; SEED Reaction: http://identifiers.org/s…	0.125	0.1	0	0	0.0277778	0.0222222	0	0.0108696	-0.025	0.0891304	-0.0277778
R_CAATPS	'CAATPS'	2.0 ca2_c + atp_c + h2o_c <-> adp_c + h_e + 2.0 ca2_e + pi_c	MetaNetX (MNX) Equation: http://identifiers.org/metanetx.reaction/MNXR96438	0	0.1	0	0	0	0	0	0	0.1	0.1	0
R_GLUabcpp	'L-glutamate transport via ABC system (periplasm)'	atp_c + h2o_c + glu__L_p <-> adp_c + glu__L_c + h_c + pi_c	RHEA: http://identifiers.org/rhea/29035#1; RHEA: http://identifiers.org/rhea/29036#1; RHEA: http://identifiers.org/rhea/29037#1; RHEA: http://identifiers.org/rhea/29038#1; EC Number: http://identifiers.org/ec-code/3.6.3.21; BioCyc: http://identifiers.org/biocyc/META:ABC-13-RXN; MetaNetX (MNX) Equation: http://identifiers.org/metanetx.reaction/MNXR100299; SEED Reaction: http://identifiers.org/seed…	0.125	0.1	0	0	0.0277778	0.0222222	0	0.0108696	-0.025	0.0891304	-0.0277778
R_GLYabcpp	'Glycine transport via ABC system'	gly_p + h2o_c + atp_c <-> adp_c + pi_c + gly_c + h_c	MetaNetX (MNX) Equation: http://identifiers.org/metanetx.reaction/MNXR100367; SEED Reaction: http://identifiers.org/seed.reaction/rxn10862; SEED Reaction: http://identifiers.org/seed.reaction/rxn12799	0.125	0.1	0	0	0.0277778	0.0222222	0	0.0108696	-0.025	0.0891304	-0.0277778
R_ILEabcpp	'L-isoleucine transport via ABC system (periplasm)'	atp_c + h2o_c + ile__L_p <-> adp_c + h_c + ile__L_c + pi_c	RHEA: http://identifiers.org/rhea/29819#1; RHEA: http://identifiers.org/rhea/29820#1; RHEA: http://identifiers.org/rhea/29821#1; RHEA: http://identifiers.org/rhea/29822#1; BioCyc: http://identifiers.org/biocyc/META:ABC-15-RXN; MetaNetX (MNX) Equation: http://identifiers.org/metanetx.reaction/MNXR100821; SEED Reaction: http://identifiers.org/seed.reaction/rxn05179; SEED Reaction: http://identifier…	0.125	0.1	0	0	0.0277778	0.0222222	0	0.0108696	-0.025	0.0891304	-0.0277778
R_LEUabcpp	'L-leucine transport via ABC system (periplasm)'	atp_c + h2o_c + leu__L_p <-> adp_c + h_c + leu__L_c + pi_c	RHEA: http://identifiers.org/rhea/29807#1; RHEA: http://identifiers.org/rhea/29808#1; RHEA: http://identifiers.org/rhea/29809#1; RHEA: http://identifiers.org/rhea/29810#1; BioCyc: http://identifiers.org/biocyc/META:ABC-35-RXN; MetaNetX (MNX) Equation: http://identifiers.org/metanetx.reaction/MNXR101054; SEED Reaction: http://identifiers.org/seed.reaction/rxn05161; SEED Reaction: http://identifier…	0.125	0.1	0	0	0.0277778	0.0222222	0	0.0108696	-0.025	0.0891304	-0.0277778
R_THMabc	'Thiamine transport via ABC system'	atp_c + h2o_c + thm_e <-> adp_c + h_c + pi_c + thm_c	MetaNetX (MNX) Equation: http://identifiers.org/metanetx.reaction/MNXR138862; SEED Reaction: http://identifiers.org/seed.reaction/rxn05177; SEED Reaction: http://identifiers.org/seed.reaction/rxn09297	0.125	0.1	0	0.0357143	0.0555556	0.0222222	0.0526316	0.0326087	-0.025	0.0673913	-0.0555556
R_VALabcpp	'L-valine transport via ABC system (periplasm)'	atp_c + h2o_c + val__L_p <-> adp_c + h_c + pi_c + val__L_c	RHEA: http://identifiers.org/rhea/29803#2; RHEA: http://identifiers.org/rhea/29804#2; RHEA: http://identifiers.org/rhea/29805#2; RHEA: http://identifiers.org/rhea/29806#2; BioCyc: http://identifiers.org/biocyc/META:ABC-36-RXN; MetaNetX (MNX) Equation: http://identifiers.org/metanetx.reaction/MNXR105187; SEED Reaction: http://identifiers.org/seed.reaction/rxn05168; SEED Reaction: http://identifier…	0.125	0.1	0	0	0.0277778	0.0222222	0	0.0108696	-0.025	0.0891304	-0.0277778
R_ETHAt2pp	'Ethanolamine transport in via proton symport'	etha_p + h_p <-> etha_c + h_c	MetaNetX (MNX) Equation: http://identifiers.org/metanetx.reaction/MNXR97975; SEED Reaction: http://identifiers.org/seed.reaction/rxn05551; SEED Reaction: http://identifiers.org/seed.reaction/rxn08423	0	0	0	0.107143	0.0833333	0.0222222	0.0526316	0.0543478	0	-0.0543478	-0.0833333
R_MAK	'RXN-12960'	atp_c + malt_c <-> adp_c + h_c + malt1p_c		0	0	0	0.0714286	0.0555556	0.111111	0.157895	0.108696	0	-0.108696	-0.0555556
R_O2XOADOX	''	2oxoadp_c + coa_c + 5.0 h_c + nad_c <-> co2_c + gcoa_c + nadh_c		0	0	0	0.0357143	0.0277778	0.0444444	0.0526316	0.0434783	0	-0.0434783	-0.0277778
R_ETOHtrpp	'Ethanol reversible transport via diffusion (periplasm)'	etoh_p <-> etoh_c	RHEA: http://identifiers.org/rhea/35267; RHEA: http://identifiers.org/rhea/35268; RHEA: http://identifiers.org/rhea/35269; RHEA: http://identifiers.org/rhea/35270; BioCyc: http://identifiers.org/biocyc/META:TRANS-RXN0-546; MetaNetX (MNX) Equation: http://identifiers.org/metanetx.reaction/MNXR97980; SEED Reaction: http://identifiers.org/seed.reaction/rxn08428; SEED Reaction: http://identifiers.org…	0	0	0	0	0	0.0444444	0	0.0217391	0	-0.0217391	0
R_MSO3abc	'Methanesulfonate transport via ABC system'	atp_c + h2o_c + mso3_e <-> adp_c + h_c + mso3_c + pi_c	MetaNetX (MNX) Equation: http://identifiers.org/metanetx.reaction/MNXR101741; SEED Reaction: http://identifiers.org/seed.reaction/rxn05621; SEED Reaction: http://identifiers.org/seed.reaction/rxn08959	0	0	0	0	0	0.0222222	0	0.0108696	0	-0.0108696	0
R_FE3DCITexs	'Dicitrate Fe(III) binding (spontaneous)'	2.0 cit_e + fe3_e <-> fe3dcit_e		0	0	0	0	0	0.0222222	0	0.0108696	0	-0.0108696	0
R_CRO4t3	'Chromate transport out via proton antiport'	cro4_c + h_e <-> h_c + cro4_e	MetaNetX (MNX) Equation: http://identifiers.org/metanetx.reaction/MNXR96913; SEED Reaction: http://identifiers.org/seed.reaction/rxn05526	0	0	0	0.107143	0.0833333	0.0222222	0.0526316	0.0543478	0	-0.0543478	-0.0833333
R_FALDtpp	'Formaldehyde transport via diffusion (periplasm)'	fald_p <-> fald_c	MetaNetX (MNX) Equation: http://identifiers.org/metanetx.reaction/MNXR99238; SEED Reaction: http://identifiers.org/seed.reaction/rxn08461; SEED Reaction: http://identifiers.org/seed.reaction/rxn08462	0	0	0	0	0	0.0444444	0.0526316	0.0326087	0	-0.0326087	0
R_NMNHYD	'Nicotinamide ribonucleotide phosphohydrolase'	h2o_c + nmn_c <-> pi_c + rnam_c	EC Number: http://identifiers.org/ec-code/3.1.3.-; EC Number: http://identifiers.org/ec-code/3.1.3.5; RHEA: http://identifiers.org/rhea/30815; RHEA: http://identifiers.org/rhea/30816; RHEA: http://identifiers.org/rhea/30817; RHEA: http://identifiers.org/rhea/30818; BioCyc: http://identifiers.org/biocyc/META:RXN-5841; MetaNetX (MNX) Equation: http://identifiers.org/metanetx.reaction/MNXR101970; Re…	0	0	0	0	0	0	0.0526316	0.0108696	0	-0.0108696	0
R_NT5C	'5''-nucleotidase'	h2o_c + nicrnt_c <-> nicrns_c + pi_c	EC Number: http://identifiers.org/ec-code/3.1.3.-; EC Number: http://identifiers.org/ec-code/3.1.3.5; RHEA: http://identifiers.org/rhea/30935; RHEA: http://identifiers.org/rhea/30936; RHEA: http://identifiers.org/rhea/30937; RHEA: http://identifiers.org/rhea/30938; BioCyc: http://identifiers.org/biocyc/META:RXN-14227; MetaNetX (MNX) Equation: http://identifiers.org/metanetx.reaction/MNXR102027; K…	0	0	0	0	0	0.0222222	0.105263	0.0326087	0	-0.0326087	0
R_NTD11	'5''-nucleotidase (IMP)'	h2o_c + imp_c <-> ins_c + pi_c	RHEA: http://identifiers.org/rhea/27718; RHEA: http://identifiers.org/rhea/27719; RHEA: http://identifiers.org/rhea/27720; RHEA: http://identifiers.org/rhea/27721; EC Number: http://identifiers.org/ec-code/3.1.3.5; EC Number: http://identifiers.org/ec-code/3.1.3.99; BioCyc: http://identifiers.org/biocyc/META:RXN-7607; MetaNetX (MNX) Equation: http://identifiers.org/metanetx.reaction/MNXR102030; R…	0.5	0.6	0.666667	0.535714	0.527778	0.6	0.736842	0.608696	0.1	-0.00869565	0.138889
R_PGP120abcpp	'Phosphatidylglycerophosphate transport via ABC system (n-C12:0, periplasm)'	atp_c + h2o_c + pgp120_c <-> adp_c + h_c + pi_c + pgp120_p	MetaNetX (MNX) Equation: http://identifiers.org/metanetx.reaction/MNXR102550	0	0	0	0.0357143	0.0277778	0.0222222	0	0.0217391	0	-0.0217391	-0.0277778
R_ACNAMt2	'N-acetylneuraminate proton symport'	acnam_e + h_e <-> acnam_c + h_c	RHEA: http://identifiers.org/rhea/28987; RHEA: http://identifiers.org/rhea/28988; RHEA: http://identifiers.org/rhea/28989; RHEA: http://identifiers.org/rhea/28990; BioCyc: http://identifiers.org/biocyc/META:RXN-15314; BioCyc: http://identifiers.org/biocyc/META:TRANS-RXN-25; MetaNetX (MNX) Equation: http://identifiers.org/metanetx.reaction/MNXR95291; SEED Reaction: http://identifiers.org/seed.reac…	0	0	0	0.0357143	0.0277778	0	0	0.0108696	0	-0.0108696	-0.0277778
R_CELBt2	''	cellb_e + h_e <-> cellb_c + h_c		0	0	0	0.0357143	0.0277778	0	0	0.0108696	0	-0.0108696	-0.0277778
R_GALt2_3	''	gal_bD_e + h_e <-> gal_bD_c + h_c		0	0	0	0.0357143	0.0277778	0	0	0.0108696	0	-0.0108696	-0.0277778
R_GLCAt2	''	glc__aD_e + h_e <-> glc__aD_c + h_c		0.125	0	0	0.0357143	0.0555556	0	0.0526316	0.0217391	-0.125	-0.0217391	-0.0555556
R_MALTt2	'Maltose transport in via proton symport'	h_e + malt_e <-> h_c + malt_c	BioCyc: http://identifiers.org/biocyc/META:TRANS-RXN-245; MetaNetX (MNX) Equation: http://identifiers.org/metanetx.reaction/MNXR101365; SEED Reaction: http://identifiers.org/seed.reaction/rxn09673	0	0	0	0.0357143	0.0277778	0	0	0.0108696	0	-0.0108696	-0.0277778
R_SBTt2	'D sorbitol transport in via proton symport'	h_e + sbt__D_e <-> h_c + sbt__D_c	MetaNetX (MNX) Equation: http://identifiers.org/metanetx.reaction/MNXR104291; SEED Reaction: http://identifiers.org/seed.reaction/rxn05648	0	0	0	0.0357143	0.0277778	0	0	0.0108696	0	-0.0108696	-0.0277778
R_SUCRt2	'Sucrose transport in via proton symport'	h_e + sucr_e <-> h_c + sucr_c	BioCyc: http://identifiers.org/biocyc/META:TRANS-RXN-244; MetaNetX (MNX) Equation: http://identifiers.org/metanetx.reaction/MNXR104640; SEED Reaction: http://identifiers.org/seed.reaction/rxn09658	0	0	0	0.0357143	0.0277778	0	0	0.0108696	0	-0.0108696	-0.0277778
R_XYLt2	'D-xylose transport in via proton symport'	h_e + xyl__D_e <-> h_c + xyl__D_c	RHEA: http://identifiers.org/rhea/28959; RHEA: http://identifiers.org/rhea/28960; RHEA: http://identifiers.org/rhea/28961; RHEA: http://identifiers.org/rhea/28962; MetaNetX (MNX) Equation: http://identifiers.org/metanetx.reaction/MNXR105271; SEED Reaction: http://identifiers.org/seed.reaction/rxn05671; SEED Reaction: http://identifiers.org/seed.reaction/rxn09384	0	0	0	0.0357143	0.0277778	0	0	0.0108696	0	-0.0108696	-0.0277778
R_H2tpp	'Hydrogen transport diffusion (periplasm)'	h2_p <-> h2_c	MetaNetX (MNX) Equation: http://identifiers.org/metanetx.reaction/MNXR100495; SEED Reaction: http://identifiers.org/seed.reaction/rxn08691; SEED Reaction: http://identifiers.org/seed.reaction/rxn08692; SEED Reaction: http://identifiers.org/seed.reaction/rxn10542	0	0	0	0	0	0.0444444	0	0.0217391	0	-0.0217391	0
R_DASYN141	'CDP-diacylglycerol synthetase (n-C14:1)'	ctp_c + h_c + pa141_c <-> cdpdtdec7eg_c + ppi_c	EC Number: http://identifiers.org/ec-code/2.7.7.41; MetaNetX (MNX) Equation: http://identifiers.org/metanetx.reaction/MNXR97156; SEED Reaction: http://identifiers.org/seed.reaction/rxn08308	0	0	0	0.0714286	0.0555556	0.0666667	0.0526316	0.0652174	0	-0.0652174	-0.0555556
R_PGP180abcpp	'Phosphatidylglycerophosphate transport via ABC system (n-C18:0, periplasm)'	atp_c + h2o_c + pgp180_c <-> adp_c + h_c + pi_c + pgp180_p	MetaNetX (MNX) Equation: http://identifiers.org/metanetx.reaction/MNXR102555; SEED Reaction: http://identifiers.org/seed.reaction/rxn09099	0	0	0	0	0	0.0222222	0	0.0108696	0	-0.0108696	0
R_DATPHs	'DATP amine hydrolysis (spontaneous)'	datp_c + h_c + h2o_c <-> ditp_c + nh4_c	MetaNetX (MNX) Equation: http://identifiers.org/metanetx.reaction/MNXR97174; SEED Reaction: http://identifiers.org/seed.reaction/rxn08313	0	0	0	0.0357143	0.0277778	0	0	0.0108696	0	-0.0108696	-0.0277778

## Sheet: Prevalence difference top hits
Supplementary table 5. Comparative analysis of the reactome infered using genome-scale metabolic models
TOP HITS (FREQUENCY DIFFERENCE)
PREVALENCE (RELATIVE FREQUENCY)			REACTION
NASAL / THIS STUDY	SYSTEMIC / THIS STUDY	ALL OTHERS	BIGG ID	Reaction Name	Reaction	Other IDs
1	0.5	0.0108696	4PEPTabcpp	Tetrapeptide (LalaDgluMdapDala) transport via ABC system (periplasm)	atp_c + h2o_c + LalaDgluMdapDala_p <-> LalaDgluMdapDala_c + adp_c + h_c + pi_c	MetaNetX (MNX) Equation: http://identifiers.org/metanetx.reaction/MNXR95050; SEED Reaction: http://identifiers.org/seed.reaction/rxn08008
0.9	0.375	0.0108696	AMPTASEPG	Aminopeptidase (pro-gly)	h2o_c + progly_c <-> gly_c + pro__L_c	RHEA: http://identifiers.org/rhea/28799; RHEA: http://identifiers.org/rhea/28800; RHEA: http://identifiers.org/rhea/28801; RHEA: http://identifiers.org/rhea/28802; MetaNetX (MNX) Equation: http://identifiers.org/metanetx.reaction/MNXR95829; SEED Reaction: http://identifiers.org/seed.reaction/rxn08133
0.9	0.375	0.0108696	CA2abc1	Calcium efflux via ABC system	atp_c + ca2_c + h2o_c <-> adp_c + h_c + pi_c + ca2_e	RHEA: http://identifiers.org/rhea/18105#1; RHEA: http://identifiers.org/rhea/18106#1; RHEA: http://identifiers.org/rhea/18107#1; RHEA: http://identifiers.org/rhea/18108#1; EC Number: http://identifiers.org/ec-code/3.6.3; EC Number: http://identifiers.org/ec-code/3.6.3.8; BioCyc: http://identifiers.org/biocyc/META:3.6.3.8-RXN; BioCyc: http://identifiers.org/biocyc/META:TRANS-RXN-194; MetaNetX (MNX…
0.8	0.25	0.0108696	CGLYabcpp	L-Cysteinylglycine (Cys-Gly) transport via ABC system (periplasm)	atp_c + h2o_c + cgly_p <-> adp_c + cgly_c + h_c + pi_c	MetaNetX (MNX) Equation: http://identifiers.org/metanetx.reaction/MNXR96656; SEED Reaction: http://identifiers.org/seed.reaction/rxn05539; SEED Reaction: http://identifiers.org/seed.reaction/rxn08210
0.1	0.625	0.141304	CLPNS140pp	Cardiolipin synthase (periplasmic, n-C14:0)	2.0 pg140_p <-> clpn140_p + glyc_p	MetaNetX (MNX) Equation: http://identifiers.org/metanetx.reaction/MNXR96782
0.9	0.25	0	FEDCabc	Iron III dicitrate transport via ABC system	h2o_c + 2.0 cit_e + fe3_e + atp_c <-> adp_c + pi_c + 2.0 cit_c + fe3_c + h_c	MetaNetX (MNX) Equation: http://identifiers.org/metanetx.reaction/MNXR99538; SEED Reaction: http://identifiers.org/seed.reaction/rxn05557
0.4	1	0.923913	PG140abcpp	Phosphatidylglycerol transport via ABC system (n-C14:0, periplasm)	atp_c + h2o_c + pg140_c <-> adp_c + h_c + pi_c + pg140_p	MetaNetX (MNX) Equation: http://identifiers.org/metanetx.reaction/MNXR102517
0.1	0.625	0.141304	PGSA140	Phosphatidylglycerol synthase (n-C14:0)	cdpdtdecg_c + glyc3p_c <-> cmp_c + h_c + pgp140_c	MetaNetX (MNX) Equation: http://identifiers.org/metanetx.reaction/MNXR102590
0.9	0.375	0.0108696	PROGLYabcpp	L-Prolinylglycine (Pro-Gly) transport via ABC system (periplasm)	atp_c + h2o_c + progly_p <-> adp_c + h_c + pi_c + progly_c	MetaNetX (MNX) Equation: http://identifiers.org/metanetx.reaction/MNXR103190; SEED Reaction: http://identifiers.org/seed.reaction/rxn09189
PREVALENCE (RELATIVE FREQUENCY)			REACTION
NH CLUSTER	SYSTEMIC (COMBINED)		BIGG ID	Reaction Name	Reaction	Other IDs
1	0.138889		4PEPTabcpp	Tetrapeptide (LalaDgluMdapDala) transport via ABC system (periplasm)	atp_c + h2o_c + LalaDgluMdapDala_p <-> LalaDgluMdapDala_c + adp_c + h_c + pi_c	iEcolC_1368; iECOK1_1307; iECIAI1_1343; iECH74115_1262; iECs_1301; iECNA114_1301; iECS88_1305; iECIAI39_1322; iECDH10B_1368; iECO103_1326; iEcHS_1320; iECP_1309; iECED1_1282; iEcE24377_1341; iECO111_1330; iECO26_1355; iECBD_1354; iE2348C_1286; iB21_1397; iAPECO1_1312; iEC042_1314; iPC815; iECB_1328; iEC55989_1330; iEcDH1_1363; iECDH1ME8569_1439; iSF_1195; iJO1366; iECABU_c1320; iECD_1391; ic_1306…
1	0.388889		ALAALAabcpp	D-alanyl-D-alanine (DalaDala) transport via ABC system (periplasm)	atp_c + h2o_c + alaala_p <-> adp_c + alaala_c + h_c + pi_c	iZ_1308; iJB785; iYL1228; iAF1260b; iY75_1357; iML1515; iUTI89_1310; iAF987; iUMNK88_1353; iWFL_1372; STM_v1_0; iEC042_1314; iBWG_1329; iB21_1397; iECABU_c1320; ic_1306; iAF1260; iEC55989_1330; iE2348C_1286; iSF_1195; iEcDH1_1363; iECBD_1354; iECDH1ME8569_1439; iJO1366; iPC815; iECB_1328; iAPECO1_1312; iECD_1391; iYS1720; iECW_1372; iUMN146_1321; iSbBS512_1146; iEcSMS35_1347; iECSF_1327; iEKO11_1…
0.833333	0.0555556		AMPTASEATRP	Aminopeptidase Ala Trp	alatrp_c + h2o_c <-> ala__L_c + trp__L_c	iJN1463
0.666667	0.0555556		AMPTASEGGLN	Aminopeptidase Gly Gln	glygln_c + h2o_c <-> gln__L_c + gly_c	iJN1463
0.666667	0.0555556		AMPTASEHH	Aminopeptidase His His	h2o_c + hishis_c <-> 2.0 his__L_c	iJN1463
1	0.0833333		AMPTASEPG	Aminopeptidase (pro-gly)	h2o_c + progly_c <-> gly_c + pro__L_c	iYS1720; iECD_1391; iPC815; iEcDH1_1363; iEC55989_1330; iJO1366; iB21_1397; iECDH1ME8569_1439; iBWG_1329; iAPECO1_1312; ic_1306; iEC042_1314; iECB_1328; iE2348C_1286; iAF1260; iSF_1195; iECBD_1354; iECABU_c1320; iECO111_1330; iECDH10B_1368; iECs_1301; iECO26_1355; iECS88_1305; iEcolC_1368; iECIAI1_1343; iEcE24377_1341; iECOK1_1307; iEcHS_1320; iECED1_1282; iECO103_1326; iECP_1309; iECNA114_1301; …
0.666667	0.0833333		AP4AS	Ap4A synthetase	2.0 atp_c + h_c <-> ap4a_c + ppi_c	iECO111_1330; iEcHS_1320; iECH74115_1262; iECDH10B_1368; iECO26_1355; iECIAI1_1343; iECO103_1326; iECOK1_1307; iECs_1301; iECNA114_1301; iEcolC_1368; iECED1_1282; iECIAI39_1322; iECS88_1305; iEcE24377_1341; iECP_1309; iAPECO1_1312; iBWG_1329; iECD_1391; iECDH1ME8569_1439; iE2348C_1286; iECABU_c1320; iEcDH1_1363; iECBD_1354; ic_1306; iB21_1397; iECB_1328; iJO1366; iSF_1195; iEC55989_1330; iEC042_1…
0.333333	0.833333		APG3PAT141	Acyl-phosphate:glycerol-3-phosphate acyltransferase (C14:1)	glyc3p_c + ttdceap_c <-> 1tdec7eg3p_c + h_c + pi_c	iUMNK88_1353; iUTI89_1310; iML1515; iAF987; iZ_1308; iWFL_1372; iY75_1357; iSFV_1184; iEKO11_1354; iSBO_1134; iECSE_1348; iG2583_1286; iSFxv_1172; iUMN146_1321; iETEC_1333; iECW_1372; iSbBS512_1146; iSDY_1059; iECSF_1327; iNRG857_1313; iS_1188; iECUMN_1333; iEcSMS35_1347; iLF82_1304; iSSON_1240; iECSP_1301; iJO1366; iBWG_1329; iEC042_1314; iEC55989_1330; iECD_1391; iECBD_1354; iEcDH1_1363; iECABU…
0.833333	0.0833333		CA2abc1	Calcium efflux via ABC system	atp_c + ca2_c + h2o_c <-> adp_c + h_c + pi_c + ca2_e	iYO844; iAM_Pv461; iAM_Pc455; iAM_Pf480; iAM_Pk459; iAM_Pb448
1	0.0555556		CGLYabcpp	L-Cysteinylglycine (Cys-Gly) transport via ABC system (periplasm)	atp_c + h2o_c + cgly_p <-> adp_c + cgly_c + h_c + pi_c	iECSF_1327; iEKO11_1354; iSSON_1240; iECSP_1301; iECW_1372; iLF82_1304; iUMN146_1321; iG2583_1286; iNRG857_1313; iECUMN_1333; iETEC_1333; iECSE_1348; iSDY_1059; iSFxv_1172; iEcSMS35_1347; iS_1188; iEcDH1_1363; ic_1306; iJO1366; iBWG_1329; iEC042_1314; iECBD_1354; iECD_1391; iE2348C_1286; iECDH1ME8569_1439; iAPECO1_1312; iEC55989_1330; iPC815; iB21_1397; iSF_1195; iAF1260; iECB_1328; iECABU_c1320;…
0.666667	0.138889		CHLabc	Choline transport via ABC system	atp_c + chol_e + h2o_c <-> adp_c + chol_c + h_c + pi_c	iNF517; iYO844; iJR904; iYS854; iEK1008; iCN900; iNJ661; iSB619
0.833333	0.0555556		FEDCabc	Iron III dicitrate transport via ABC system	h2o_c + 2.0 cit_e + fe3_e + atp_c <-> adp_c + pi_c + 2.0 cit_c + fe3_c + h_c	iIT341; iYO844; iAF692
0.666667	0.138889		G3PCabcpp	Sn-glycerol-3-phosphocholine transport via ABC system (periplasm)	atp_c + h2o_c + g3pc_p <-> adp_c + g3pc_c + h_c + pi_c	iEcHS_1320; iECH74115_1262; iECO103_1326; iECO26_1355; iECED1_1282; iECDH10B_1368; iECNA114_1301; iECS88_1305; iECP_1309; iEcolC_1368; iECIAI39_1322; iECO111_1330; iEcE24377_1341; iECOK1_1307; iECs_1301; iECIAI1_1343; iB21_1397; iJO1366; iBWG_1329; iECB_1328; iEC042_1314; iEC55989_1330; iE2348C_1286; iEcDH1_1363; iECD_1391; iPC815; iAPECO1_1312; iAF1260; iECABU_c1320; iECDH1ME8569_1439; ic_1306; …
0.666667	0.138889		GPDDA1	Glycerophosphodiester phosphodiesterase (Glycerophosphocholine)	g3pc_c + h2o_c <-> chol_c + glyc3p_c + h_c	iML1515; iHN637; iLB1027_lipid; iJR904; iAB_RBC_283; iYL1228; RECON1; iZ_1308; iMM1415; iY75_1357; iAF1260b; iWFL_1372; iUTI89_1310; STM_v1_0; iAT_PLT_636; iCHOv1; iLJ478; iNF517; iYO844; iUMNK88_1353; iAM_Pk459; iAM_Pc455; iAM_Pf480; iAM_Pv461; iEC1364_W; Recon3D; iCHOv1_DG44; iEC1372_W3110; iEC1356_Bl21DE3; iEC1368_DH5a; iCN718; iEC1349_Crooks; iAM_Pb448; iEC1344_C; iYS1720; iE2348C_1286; iSF_1…
0.666667	0.0833333		GTHRDabcpp	Reduced glutathione via ABC system (periplasm)	atp_c + h2o_c + gthrd_p <-> adp_c + gthrd_c + h_c + pi_c	iECABU_c1320; iE2348C_1286; iJO1366; iEC042_1314; iECBD_1354; iECD_1391; iBWG_1329; iAF1260; iEC55989_1330; iAPECO1_1312; iEcDH1_1363; ic_1306; iSF_1195; iB21_1397; iECB_1328; iECDH1ME8569_1439; iWFL_1372; iZ_1308; iUTI89_1310; iUMNK88_1353; iY75_1357; iYL1228; iML1515; iAF1260b; STM_v1_0; iECOK1_1307; iECIAI39_1322; iEcolC_1368; iECDH10B_1368; iECIAI1_1343; iEcE24377_1341; iECH74115_1262; iECED1…
0.833333	0.0833333		LEULEULAPc	Hydrolysis of Leucylleucine in the small intestine for cellular uptake	h2o_c + leuleu_c <-> 2.0 leu__L_c	iCHOv1; Recon3D; iJN1463; iCHOv1_DG44
0.166667	0.888889		PG140abcpp	Phosphatidylglycerol transport via ABC system (n-C14:0, periplasm)	atp_c + h2o_c + pg140_c <-> adp_c + h_c + pi_c + pg140_p	iEC1344_C; iEC1372_W3110; iEC1368_DH5a; iEC1349_Crooks; iEC1364_W; iEC1356_Bl21DE3; iAF1260b; iAF987; iZ_1308; iY75_1357; iYL1228; iWFL_1372; iUMNK88_1353; iUMN146_1321; iML1515; iUTI89_1310; STM_v1_0; iJN1463; iYS1720; iECS88_1305; iEcE24377_1341; iECDH10B_1368; iECH74115_1262; iEcHS_1320; iECO26_1355; iECO103_1326; iECED1_1282; iECOK1_1307; iECP_1309; iECNA114_1301; iECIAI39_1322; iECIAI1_1343;…
0.666667	0.111111		PIabc	Phosphate transport via ABC system	atp_c + h2o_c + pi_e <-> adp_c + h_c + 2.0 pi_c	iSB619; iNJ661; iJN1463; iLJ478; iNF517; iHN637; iYO844; iJR904; iAF692; iEK1008; iYS854; iCN900
1	0.0833333		PROGLYabcpp	L-Prolinylglycine (Pro-Gly) transport via ABC system (periplasm)	atp_c + h2o_c + progly_p <-> adp_c + h_c + pi_c + progly_c	iB21_1397; iECB_1328; iECBD_1354; iEC55989_1330; iECABU_c1320; ic_1306; iJO1366; iE2348C_1286; iAPECO1_1312; iECD_1391; iPC815; iAF1260; iEcDH1_1363; iSF_1195; iECDH1ME8569_1439; iBWG_1329; iEC042_1314; iECUMN_1333; iSFxv_1172; iECW_1372; iECSF_1327; iEcSMS35_1347; iNRG857_1313; iECSE_1348; iSSON_1240; iECSP_1301; iG2583_1286; iEKO11_1354; iS_1188; iECs_1301; iSDY_1059; iLF82_1304; iETEC_1333; iY…
0.666667	0.0277778		AMPTASEGS	Aminopeptidase Gly Ser	glyser_c + h2o_c <-> gly_c + ser__L_c	iJN1463
0.5	0		GLCt2	D-glucose transport in via proton symport	glc__D_e + h_e <-> h_c + glc__D_c	iCN900; iCHOv1_DG44; iCHOv1; RECON1; iJR904; iHN637; iMM1415; iYO844; iIT341
0.5	0		NAt	Sodium transport (uniport)	na1_e <-> na1_c	Recon3D; iCN718; iEK1008; iAB_RBC_283; RECON1; iCHOv1; iLJ478; iMM1415
0.5	0		UREAt	Urea transport via facilitate diffusion	urea_e <-> urea_c	iYO844; iJR904; iAF692; iMM1415; RECON1; iCHOv1; iAT_PLT_636; iAB_RBC_283; iIT341; iSB619; iCN718; iCHOv1_DG44; Recon3D; iYS854
0.333333	0.833333		AGPAT141	1-tetradec-7-enoyl-sn-glycerol 3-phosphate O-acyltransferase (n-C14:1)	1tdec7eg3p_c + tdeACP_c <-> ACP_c + pa141_c	iECABU_c1320; iJO1366; iB21_1397; iEC042_1314; iEcDH1_1363; iAPECO1_1312; iECDH1ME8569_1439; iPC815; iBWG_1329; iECB_1328; iE2348C_1286; iECD_1391; iSF_1195; iAF1260; ic_1306; iECBD_1354; iEC55989_1330; iYS1720; iUMNK88_1353; iAF1260b; iUTI89_1310; STM_v1_0; iYL1228; iY75_1357; iWFL_1372; iZ_1308; iML1515; iAF987; iG2583_1286; iSbBS512_1146; iECSP_1301; iSFxv_1172; iSSON_1240; iECW_1372; iECSE_13…
0.833333	0.0555556		ALATRPabcpp	L Alaninyltryptophan Ala Trp transport via ABC system periplasm	alatrp_p + atp_c + h2o_c <-> adp_c + alatrp_c + h_c + pi_c	iJN1463
0.666667	0.0555556		GLYGLNabcpp	L Glycinylglutamine Gly Gln transport via ABC system periplasm	atp_c + glygln_p + h2o_c <-> adp_c + glygln_c + h_c + pi_c	iJN1463
0.666667	0.0277778		GLYSERabcpp	L Glycinylserine Gly Ser transport via ABC system periplasm	atp_c + glyser_p + h2o_c <-> adp_c + glyser_c + h_c + pi_c	iJN1463
0.666667	0.0555556		HISHISabcpp	L Histidinylhistidine His His transport via ABC system periplasm	atp_c + h2o_c + hishis_p <-> adp_c + h_c + hishis_c + pi_c	iJN1463
0.833333	0.0833333		LEULEUabcpp	L leucylleucine leuleu transport via ABC system periplasm	atp_c + h2o_c + leuleu_p <-> adp_c + h_c + leuleu_c + pi_c	iJN1463

## Sheet: Reaction essentality
Supplementary table 5. Comparative analysis of the reactome infered using genome-scale metabolic models
BIGG ID	PREVALENCE					DIFFERENCE
	NASAL / THIS STUDY	SYSTEMIC / THIS STUDY	ALL OTHERS	NH CLUSTER	SYSTEMIC (COMBINED)	NASAL THIS STUDY VS SYSTEMIC THIS STUDY	NASAL THIS STUDY VS ALL OTHERS	NH CLUSTER VS ALL SYSTEMIC
R_AAAN	1	1	1	1	1	0	0	0
R_AACPS2	1	1	1			0	0
R_AACPS3	0.6	0.75	0.858482	0.833333	0.888582	-0.15	-0.258482	-0.0552486
R_AACPS4	1	1	0.967262	1	0.944444	0	0.0327383	0.0555556
R_AACPS6	1	1	0.98913	1	1	0	0.0108696	0
R_ACALDt	0.0419702	0.0116888	0.191003	0.0543694	0.154095	0.0302814	-0.149033	-0.0997255
R_ACGApts	1	1	1	1	1	0	0	0
R_ACKILE	1	1	0.999941	1	0.999907	0	5.93206e-05	9.31291e-05
R_ACKLEU	1	1	0.999619	1	0.999599	0	0.000381451	0.000400869
R_ACKVAL	0.99591	1	0.991569	0.993184	0.984396	-0.00408987	0.0043409	0.00878776
R_ACKr	0.999472	0.978888	0.984667	0.999416	0.98489	0.0205839	0.0148052	0.0145264
R_ACLS_a	1	1	0.978261	1	0.972222	0	0.0217391	0.0277778
R_ACLS_d	1	1	1	1	1	0	0	0
R_ACMANApts	1	1	1	1	1	0	0	0
R_ACNML	1	1	1	1	1	0	0	0
R_ACPPAT141	1	1	1			0	0
R_ACPPAT160	1	1	1	1	1	0	0	0
R_ACPPAT161	1	1	1	1	1	0	0	0
R_ACPPAT180	1	1	1	1	1	0	0	0
R_ACPS1_1	1	1	1	1	1	0	0	0
R_ACPpds	1	1	1	1	1	0	0	0
R_ACTNabc	1	1	1	1	1	0	0	0
R_ACTNabc1	1	1	1	1	1	0	0	0
R_ADK1	0.9	0.993237	0.999546	0.833333	0.997455	-0.0932368	-0.0995464	-0.164122
R_ADK2	1	1	1	1	1	0	0	0
R_ADK3	0.9	1	1	0.833333	1	-0.1	-0.1	-0.166667
R_ADK4	1	1	1	1	1	0	1.59872e-14	3.59712e-14
R_ADKd	1	1	1	1	1	0	0	0
R_ADNK1	0.99842	0.998569	0.998629	0.998352	0.998651	-0.000148336	-0.000208764	-0.000298904
R_ADPT	1	0.875	1	1	0.972222	0.125	0	0.0277778
R_AGDC	1	1	1	1	1	0	0	0
R_AGPAT160	0.7	0.75	0.934531	0.833333	0.91636	-0.05	-0.234531	-0.0830264
R_AGPAT161	1	1	0.978131	1	0.972222	0	0.0218687	0.0277778
R_AGPAT180	1	1	1	1	1	0	0	0
R_AGPOP	1	0.999999	0.999979	1	0.999975	8.90674e-07	2.13852e-05	2.47996e-05
R_AHCYSNS	1	1	1	1	1	0	0	0
R_AKGDH	0.99965	0.999275	0.99726	0.999416	0.995894	0.000374911	0.00238933	0.00352248
R_ALATA_D2	1	1	0.967391	1	0.972222	0	0.0326087	0.0277778
R_ALATA_L2	0.664155	0.999141	0.86915	0.666667	0.944189	-0.334986	-0.204995	-0.277523
R_ALAabc	0.6	0.375	0.413012	0.5	0.333254	0.225	0.186988	0.166746
R_AMANAPEr	1	1	1	1	1	0	0	0
R_AMPEP1	1	1	1	1	1	0	0	0
R_AMPEP10	1	1	1	1	1	0	0	0
R_AMPEP11	1	1	1	1	1	0	0	0
R_AMPEP12	1	1	1	1	1	0	0	0
R_AMPEP13	1	1	1	1	1	0	0	0
R_AMPEP14	1	1	1	1	1	0	0	0
R_AMPEP15	1	1	1	1	1	0	0	0
R_AMPEP16	1	1	1	1	1	0	0	0
R_AMPEP17	1	1	1	1	1	0	0	0
R_AMPEP18	1	1	1	1	1	0	0	0
R_AMPEP2	1	1	1	1	1	0	0	0
R_AMPEP3	1	1	1	1	1	0	0	0
R_AMPEP4	1	1	1	1	1	0	0	0
R_AMPEP5	1	1	1	1	1	0	0	0
R_AMPEP6	1	1	1	1	1	0	0	0
R_AMPEP7	1	1	1	1	1	0	0	0
R_AMPEP8	1	1	1	1	1	0	0	0
R_AMPEP9	1	1	1	1	1	0	0	0
R_AMPTASECG	1	1	1	1	1	0	0	0
R_APG3PAT160	1	1	1	1	1	0	0	0
R_APG3PAT161	1	1	1	1	1	0	0	0
R_APG3PAT180	1	1	1	1	1	0	0	0
R_ARBTpts	1	1	1	1	1	0	0	0
R_ARBabc	1	1	1	1	1	0	0	0
R_ARGabc	0.5	0.5	0.543478	0.666667	0.5	-5.9952e-15	-0.0434783	0.166667
R_ARGabcpp	1	1	1	1	1	0	0	0
R_ASCBpts	1	1	1	1	1	0	0	0
R_ASNS2	1	1	1	1	1	0	0	0
R_ASNabc	0.995316	0.99534	0.995164	0.995306	0.9949	-2.42163e-05	0.00015232	0.000406523
R_ASPabc	0.4	0.25	0.141304	0.333333	0.111111	0.15	0.258696	0.222222
R_ATPS4rpp	0.993885	0.875	0.962184	0.994253	0.944287	0.118885	0.0317004	0.0499654
R_BTNt	1	1	1	1	1	0	0	0
R_CA2abc	0.222222	0.125	0	0.2	0.0285714	0.0972222	0.222222	0.171429
R_CELBpts	1	1	1	1	1	0	0	0
R_CLPNS160	1	1	1	1	1	0	0	0
R_CLPNS2_BS	0	0	0	0	0	0	0	0
R_CO2t	0.9	1	0.945055	1	0.972222	-0.1	-0.0450549	0.0277778
R_CO2tex	1	1	0.988636	1	1	0	0.0113636	0
R_CO2tpp	1	1	0.988506	1	1	0	0.0114943	0
R_COabc	0	0.125	0.0978261	0	0.0833333	-0.125	-0.0978261	-0.0833333
R_CRO4abcpp	1	1	1	1	1	0	0	0
R_CRO4t3pp	1	1	1	1	1	0	0	0
R_CTPS1	1	1	1	1	1	0	4.996e-15	9.99201e-15
R_CTPS1_2	1	1	0.98913	1	1	-5.9952e-15	0.0108696	1.89848e-14
R_CTPS2	0.999884	0.989471	0.99852	1	0.997439	0.0104136	0.00136409	0.00256089
R_CYSabc	0.0996179	0	0	0	0	0.0996179	0.0996179	0
R_CYSabc2pp	1	1	1	1	1	0	0	0
R_CYTD	0.698009	0.741518	0.923243	0.996681	0.914782	-0.0435093	-0.225234	0.0818993
R_CYTK1	0.667661	0.470673	0.394052	0.806066	0.438677	0.196989	0.273609	0.367389
R_CYTK2	1	1	0.999803	1	0.999899	9.99201e-15	0.000197326	0.000101181
R_CYTOM	1	1	1	1	1	0	0	0
R_DADK	1	1	1	1	1	0	0	0
R_DASYN160	0.9	0.875	0.999891	1	0.972038	0.025	-0.0998905	0.0279622
R_DASYN161	1	1	1	1	1	0	0	0
R_DASYN180	1	1	1	1	1	0	0	0
R_DCMPDA	1	1	0.999896	1	0.999896	0	0.000103672	0.000104072
R_DCYTD	1	1	1	1	1	-9.99201e-16	-9.99201e-16	-9.99201e-16
R_DGK1	1	0.999999	0.99997	1	0.999976	8.90674e-07	3.04821e-05	2.4408e-05
R_DGNSK	1	0.999999	0.99997	1	0.999976	8.90674e-07	3.04821e-05	2.4408e-05
R_DHAPT	0.777056	0.875	0.931667	0.628427	0.886117	-0.0979439	-0.154611	-0.257691
R_DHFR	1	1	1	1	1	-5.89528e-14	-5.89528e-14	-8.60423e-14
R_DHFR2i	1	1	1	1	1	1.9984e-14	3.19744e-14	5.59552e-14
R_DHORTS	1	1	1	1	1	0	0	0
R_DHQTi	1	1	0.98913	1	1	0	0.0108696	0
R_DIPEPabc1	1	1	1	1	1	0	0	0
R_DIPEPabc10	1	1	1	1	1	0	0	0
R_DIPEPabc12	1	1	1	1	1	0	0	0
R_DIPEPabc13	1	1	1	1	1	0	0	0
R_DIPEPabc14	1	1	1	1	1	0	0	0
R_DIPEPabc15	1	1	1	1	1	0	0	0
R_DIPEPabc3	1	1	1	1	1	0	0	0
R_DIPEPabc8	1	1	1	1	1	0	0	0
R_DRIBabc	1	1	1	1	1	0	0	0
R_DRPA	1	1	1	1	1	0	0	0
R_DTMPK	0	0	0	0	0	0	0	0
R_DURIK1	1	1	1	1	1	0	0	0
R_DURIK1_1	1	1	1	1	1	0	0	0
R_DURIPP	1	1	1	1	1	0	0	0
R_DURIPP_1	1	1	1	1	1	0	0	0
R_ENO	0	0	0.00326779	0	0.0029222	0	-0.00326779	-0.0029222
R_F1PP	1	1	1	1	1	0	0	0
R_F6PP	1	1	1	1	1	0	0	0
R_FBA	0.862416	0.862593	0.647711	0.818256	0.777899	-0.000176923	0.214705	0.0403573
R_FBA2	0.587784	0.604675	0.728585	0.656364	0.626842	-0.0168911	-0.140801	0.0295213
R_FBA3	0.7	0.871694	0.455876	0.833333	0.582599	-0.171694	0.244124	0.250735
R_FBP	1	1	1	1	1	0	0	0
R_FE2Gabcpp	1	1	1	1	1	0	0	0
R_FE2abc	1	1	1	1	1	9.99201e-15	2.89768e-14	1.09912e-14
R_FE2abcpp	1	1	1	1	1	0	0	0
R_FE2tex	1	1	1	1	1	0	0	0
R_FE3Gabcpp	1	1	1	1	1	0	0	0
R_FE3PYOVDL2	1	1	1	1	1	0	0	0
R_FEROc	1	0.999996	0.999998	1	0.999998	4.14337e-06	1.59092e-06	2.3912e-06
R_FMNAT	0.9	1	0.978261	1	1	-0.1	-0.0782609	8.99281e-15
R_FMNAT_1	1	1	1	1	1	0	5.9952e-15	0
R_FOLR2	1	1	1	1	1	0	0	0
R_FRUK	0.981905	0.991263	0.992329	0.984923	0.990273	-0.00935753	-0.0104234	-0.00535048
R_FRUpts	1	1	1	1	1	0	0	0
R_G1PP	1	1	1	1	1	0	0	0
R_G3PAT160	1	1	1	1	1	-9.99201e-16	0	2.9976e-15
R_G3PAT161	1	1	1	1	1	1.80078e-13	1.80078e-13	0
R_G3PAT180	1	1	1	1	1	0	0	0
R_G3PD1ir	1	1	1	1	1	2.39808e-14	-1.19904e-14	-5.9952e-15
R_G3PD2	1	1	1	1	1	-1.9984e-15	1.9984e-15	0
R_G3PEabcpp	1	1	0.999884	1	0.99981	0	0.000115765	0.000189688
R_G3PGabcpp	1	1	1	1	1	0	0	0
R_G3PIabcpp	1	1	1	1	1	0	0	0
R_G3PSabcpp	1	1	1	1	1	0	0	0
R_G3PT	1	1	1	1	1	0	0	0
R_G6PDA	1	1	1	1	1	0	0	0
R_G6PI	1	1	1	1	1	0	0	0
R_G6PI3	1	1	1	1	1	0	0	0
R_G6PP	1	1	1	1	1	0	0	0
R_GALTpts	1	1	1	1	1	0	0	0
R_GALabcpp	1	1	1	1	1	0	0	0
R_GALpts	1	1	1	1	1	0	0	0
R_GAMpts	1	1	1	1	1	0	0	0
R_GAPD	1	1	1	1	1	2.09832e-14	-8.99281e-15	-7.99361e-15
R_GAPD_1	1	1	1	1	1	0	2.29816e-14	1.4988e-14
R_GAPDi_nadp	1	1	1	1	1	0	0	0
R_GCCc	1	1	1	1	1	0	0	0
R_GCVHADPr	1	1	1	1	1	0	0	0
R_GHMT2r	0.999364	0.999436	0.999501	0.999372	0.999462	-7.22748e-05	-0.000137096	-9.02798e-05
R_GK1	1	1	1	1	1	1.25011e-13	1.9984e-15	1.69864e-14
R_GK2	1	1	1	1	1	0	0	0
R_GLCADpts	1	1	1	1	1	0	0	0
R_GLCabc	1	1	1	1	1	0	0	0
R_GLCabcpp	1	1	1	1	1	0	0	0
R_GLCpts	0.576703	0.502858	0.537971	0.62387	0.506705	0.0738443	0.0387322	0.117164
R_GLNabc	0.1	0.125	0.0434783	0	0.0555556	-0.025	0.0565217	-0.0555556
R_GLUabc	0.997983	0.997361	0.993531	0.997806	0.994962	0.000621524	0.00445236	0.00284326
R_GLYC3Pabcpp	0.998284	1	0.98876	0.997712	0.999693	-0.00171615	0.00952377	-0.00198124
R_GLYCYSAP	1	1	1	1	1	0	0	0
R_GLYGLYCNc	1	1	1	1	1	0	0	0
R_GLYLEUAP	1	1	1	1	1	0	0	0
R_GLYPHEAP	1	1	1	1	1	0	0	0
R_GLYTYRAP	1	1	1	1	1	0	0	0
R_GLYabc	1	1	0.999924	1	0.999984	-9.99201e-16	7.64112e-05	1.60027e-05
R_GPDDA2	0.9	1	0.999888	1	0.99981	-0.1	-0.0998881	0.000189688
R_GPDDA3	1	1	1	1	1	0	0	0
R_GPDDA4	1	0.875	1	1	0.972222	0.125	0	0.0277778
R_GPDDA5	1	1	1	1	1	0	0	0
R_GTHOr	1	1	1	1	1	0	0	0
R_GTHRDabc2pp	1	1	1	1	1	0	0	0
R_GTHRDt2_1	1	1	1	1	1	0	0	0
R_GUAPRT	0.7	0.749865	0.597826	0.666667	0.638859	-0.0498652	0.102174	0.0278077
R_H2Ot	1	1	1	1	1	-7.99361e-15	-2.9976e-15	5.9952e-15
R_H2Otex	1	1	1	1	1	0	0	0
R_H2Otpp	1	1	1	1	1	-4.996e-15	1.9984e-15	1.4988e-14
R_H2SO	1	1	1	1	1	0	0	0
R_H2St1	1	1	1	1	1	0	0	0
R_HCO3E	0.1	0	0.0108696	0	0	0.1	0.0891304	0
R_HCYSMT	1	1	1	1	1	0	0	0
R_HEX1	1	1	1	1	1	0	0	-9.99201e-16
R_HISabc	0	0.125	0.0543478	0	0.0555556	-0.125	-0.0543478	-0.0555556
R_HXPRT	1	1	0.956522	1	0.972222	0	0.0434783	0.0277778
R_IDPh_1	1	1	1	1	1	0	1.79856e-14	7.99361e-15
R_ILEabc	0.1	0.125	0.0108696	0	0.0277778	-0.025	0.0891304	-0.0277778
R_INSTabc	1	1	0.99971	1	0.999258	0	0.000290215	0.000741659
R_KG6PDC	1	1	1	1	1	0	0	0
R_Kt1	0.947322	0.925307	0.948362			0.0220148	-0.0010397
R_Kt2r	0.760739	0.921184	0.945573	0.803533	0.938064	-0.160445	-0.184834	-0.134531
R_LALGP	1	1	1	1	1	0	0	0
R_LDH_L	1	1	0.98913	1	0.972222	0	0.0108696	0.0277778
R_LEUabc	0.1	0	0.0325487	0	0.0276745	0.1	0.0674513	-0.0276745
R_LIPAMPL	1	1	1	1	1	0	0	0
R_LIPATPT_2	1	1	1	1	1	0	0	0
R_LIPOPBt	1	1	1	1	1	0	0	0
R_LYSabc	0.7	1	0.956522	0.666667	0.944444	-0.3	-0.256522	-0.277778
R_LYSabcpp	1	1	1	1	0.972222	0	0	0.0277778
R_LacR	1	1	0.98913			0	0.0108696
R_M1PD	1	1	1	1	1	0	0	0
R_MALT	1	1	1	1	1	0	0	0
R_MALTHPabc	1	1	1	1	1	0	0	0
R_MALTHXabc	1	1	1	1	1	0	0	0
R_MALTHXabcpp	1	1	1	1	1	0	0	0
R_MALTTRabc	1	1	1	1	1	0	0	0
R_MALTabc	1	1	1	1	1	0	0	0
R_MALTpts	1	1	1	1	1	0	0	0
R_MAN6PI	1	1	1	1	1	0	0	0
R_MANpts	1	1	1	1	1	0	0	0
R_MDH	0.999654	0.999516	0.988826	0.999719	0.971263	0.000137641	0.0108272	0.0284567
R_METAT	0	0.25	0.184783	0	0.222222	-0.25	-0.184783	-0.222222
R_METDabc	1	1	1	1	1	0	0	0
R_METOX1s	1	1	1	1	1	0	0	0
R_METOX2s	1	1	1	1	1	0	0	0
R_METSOXR1	1	1	1	1	1	0	0	0
R_METSOXR2	1	1	1	1	1	0	0	0
R_METSR_S1	1	1	1	1	1	0	0	0
R_METabc	1	1	0.98913	1	1	-1.19904e-14	0.0108696	2.9976e-14
R_METabcpp	1	1	1	1	1	0	0	0
R_MG2uabcpp	1	1	1	1	1	0	0	0
R_MGt5	0.89938	0.999194	0.955837	0.999352	0.97146	-0.0998135	-0.0564572	0.0278917
R_MLTG1	1	1	1	1	1	0	0	0
R_MLTG2	1	1	1	1	1	0	0	0
R_MLTG3	1	1	1	1	1	0	0	0
R_MLTG4	1	1	1	1	1	0	0	0
R_MLTG5	1	1	1	1	1	0	0	0
R_MLTG6	1	1	1	1	1	0	0	0
R_MN6PP	1	1	1	1	1	0	0	0
R_MNLpts	1	1	1	1	1	0	0	0
R_MNLptspp	1	1	1			0	0
R_MNabc	0	0	0	0	0	0	0	0
R_MOBDabc	0	0	0	0	0	0	0	0
R_MPL	1	1	1	1	1	0	0	0
R_MS_1	1	0.999999	0.999999	1	0.999999	1.17863e-06	8.01525e-07	1.00381e-06
R_MTI	1	1	1	1	1	0	0	0
R_NADDPp_1	0.99992	0.874934	0.999962	0.999955	0.97217	0.124986	-4.23387e-05	0.0277845
R_NADHPO	1	1	1	1	1	5.19584e-14	9.99201e-15	6.59472e-14
R_NADS1	1	1	1	1	1	-4.996e-15	5.9952e-15	1.9984e-15
R_NADS2	1	0.999982	0.967383	1	0.972218	1.83945e-05	0.0326174	0.0277819
R_NAPRT	0.8	1	0.879919	0.833333	0.888889	-0.2	-0.0799186	-0.0555556
R_NAabc	1	1	1	1	1	0	0	0
R_NAabcO	0.7	0.625	1.18982e-13	0.666667	0.138889	0.075	0.7	0.527778
R_NAt6	1	1	1	1	1	0	0	0
R_NH3c	0.999982	0.985057	0.993169	0.999975	0.988642	0.0149253	0.00681313	0.0113327
R_NH4tex	0	0.0815986	0.0751699	0	0.0515046	-0.0815986	-0.0751699	-0.0515046
R_NH4tpp	0	0.0815986	0.0751699	0	0.0515046	-0.0815986	-0.0751699	-0.0515046
R_NIabc	1	1	1			0	0
R_NMNAT	1	1	1			0	0
R_NMNHYD_1	1	1	1	1	1	0	0	0
R_NNATr	0.3	0.375	0.152174	0.166667	0.222222	-0.075	0.147826	-0.0555556
R_NO3abc	1	1	1	1	1	0	0	0
R_NOX	0.920173	1	0.859796	0.866955	0.916667	-0.0798271	0.0603765	-0.0497118
R_NP1_1	1	1	1	1	1	0	0	0
R_NTD10	1	1	1	1	1	0	0	0
R_NTD1_1	1	1	0.999981	1	0.999976	2.59792e-14	1.91596e-05	2.421e-05
R_NTD6	1	1	1	1	1	0	0	0
R_NTD7	1	1	1	1	1	0	0	0
R_NTD8	1	1	1	1	1	0	0	0
R_NTD9	1	1	0.999989	1	1	0	1.13225e-05	0
R_NTP1	1	1	1	1	1	0	0	0
R_NTP3	1	1	1	1	1	0	0	0
R_O2tex	0.38974	0.521545	0.300255	0.415503	0.441962	-0.131805	0.0894852	-0.0264593
R_O2tpp	0.38974	0.625395	0.379817	0.415503	0.557652	-0.235655	0.00992296	-0.142149
R_OBDHc	1	1	1	1	1	0	0	0
R_OIVD1r	0	0	0	0	0	0	0	0
R_OIVD2	0.1	0.125	0.0224719	0.166667	0.0294118	-0.025	0.0775281	0.137255
R_OIVD3	0.1	0	0	0	0	0.1	0.1	0
R_ORNabcpp	1	1	1			0	0
R_PA141abcpp	1	1	1	1	1	0	0	0
R_PA161abcpp	1	1	0.9998	1	0.999834	0	0.000199706	0.000166229
R_PA180abcpp	1	1	1	1	1	0	0	0
R_PBUTT	1	1	1	1	1	0	0	0
R_PDH	1	1	1	1	1	0	1.19904e-14	-1.19904e-14
R_PDHbr	1	1	1	1	1	0	0	0
R_PDHcr	1	1	0.98913	1	0.972222	0	0.0108696	0.0277778
R_PDXPP	1	1	0.999954	1	1	0	4.56082e-05	0
R_PE180abcpp	1	1	0.999657	1	0.999562	0	0.000342896	0.000438271
R_PFK	0.881475	0.873559	0.660777	0.833333	0.788953	0.00791567	0.220698	0.0443801
R_PFK_2	1	1	1	1	1	0	0	0
R_PFK_3	1	0.996694	0.999354	1	0.999265	0.00330573	0.000645506	0.000734608
R_PG120abcpp	1	1	1			0	0
R_PG141abcpp	1	1	1	1	1	0	0	0
R_PG161abcpp	1	1	0.999875	1	0.999687	0	0.000125061	0.000312652
R_PG180abcpp	1	1	1	1	1	0	0	0
R_PG181abcpp	1	1	0.963855	1	0.971429	0	0.0361446	0.0285714
R_PGI	1	1	1	1	1	1.9984e-14	3.89688e-14	3.69704e-14
R_PGI1c	1	1	1	1	1	0	0	0
R_PGK	0	0	0.0033045	0	0.00301602	0	-0.0033045	-0.00301602
R_PGM	0	0	0.00326779	0	0.0029222	0	-0.00326779	-0.0029222
R_PGMT	1	1	1	1	1	0	0	0
R_PGMT_2	1	1	1	1	1	0	0	0
R_PGSA160	1	0.857143	1	1	0.971429	0.142857	0	0.0285714
R_PGSA161	1	1	1	1	1	0	0	0
R_PGSA180	1	1	1	1	1	0	0	0
R_PHEabc	0.1	0	0	0	0	0.1	0.1	0
R_PNP	1	1	1	1	1	0	0	0
R_PNP_1	1	1	1	1	1	-2.69784e-14	-2.69784e-14	0
R_PPA	1	1	1	1	1	-3.4972e-14	-3.4972e-14	-6.99441e-15
R_PPAKr	1	1	1	1	1	0	0	0
R_PPM	0.998292	0.993647	0.998137	0.997951	0.997553	0.00464528	0.000155496	0.000397775
R_PPM2	1	1	1	1	1	0	0	0
R_PROHISGLUtr	1	1	1	1	1	0	0	0
R_PROabc	0	0.125	0.0434783	0	0.0555556	-0.125	-0.0434783	-0.0555556
R_PRPPS	0	0	0.0429841	0	0	0	-0.0429841	0
R_PTA2	1	1	1	1	1	0	0	0
R_PTAILE	1	1	0.999941	1	0.999907	0	5.93206e-05	9.31291e-05
R_PTALEU	1	1	0.999619	1	0.999599	0	0.000381451	0.000400869
R_PTAVAL	0.99591	1	0.991569	0.993184	0.984396	-0.00408987	0.0043409	0.00878776
R_PTAr	0.999413	0.978888	0.984667	0.999416	0.98489	0.0205252	0.0147465	0.0145264
R_PTHRP	1	1	1	1	1	0	0	0
R_PTRCORNt7	1	1	1	1	1	0	0	0
R_PTRCabc	1	1	1	1	1	0	0	0
R_PTRCabcpp	1	1	1	1	1	0	0	0
R_PUNP1	1	1	1	1	1	0	0	2.9976e-15
R_PUNP1_1	1	0.999605	1	1	0.999912	0.000394513	-2.9976e-15	8.76696e-05
R_PUNP2	1	1	1	1	1	0	0	0
R_PUNP2_1	1	1	1	1	1	0	0	0
R_PUNP3	1	1	1	1	1	0	0	0
R_PUNP3_1	1	1	1	1	1	0	0	0
R_PUNP4	1	1	1	1	1	0	0	0
R_PUNP4_1	1	1	1	1	1	0	0	0
R_PUNP5	1	1	1	1	1	0	0	0
R_PUNP5_1	1	1	1	1	1	0	0	0
R_PUNP6	1	1	1	1	1	0	0	0
R_PUNP6_1	1	1	1	1	1	0	0	0
R_PUNP7	1	1	1	1	1	0	0	0
R_PUNP7_1	1	1	1	1	1	0	0	0
R_PYDXPP	1	1	1	1	1	0	0	0
R_PYK	1	1	1	1	1	-1.09912e-14	9.99201e-16	-1.29896e-14
R_PYK2	0.2	0	0.0217391	0.333333	0	0.2	0.178261	0.333333
R_PYK3	1	1	1	1	1	2.498e-14	3.29736e-14	7.79377e-14
R_PYK4	0.92245	0.810786	0.910729	0.944487	0.885279	0.111664	0.0117202	0.0592077
R_PYK5	1	1	1	1	1	0	1.9984e-14	3.4972e-14
R_PYNP1	1	1	1	1	1	0	0	0
R_PYNP1_1	1	1	1	1	1	0	0	0
R_PYNP2r	0.999758	0.99967	0.999941	0.999597	0.999896	8.81844e-05	-0.000182778	-0.000298914
R_PYNP2r_1	1	1	1	1	1	-2.9976e-15	-1.9984e-15	0
R_R5PP	1	1	1	1	1	0	0	0
R_RBFK_1	0.333333	0.125	0	0.333333	0.0277778	0.208333	0.333333	0.305556
R_RBP4E	1	1	1	1	1	0	0	0
R_RIBFLVt2	0	0	0	0	0	0	0	0
R_RIBabc	1	1	1	1	1	0	0	0
R_RIBabc1	1	1	1	1	1	0	0	0
R_RIBabcpp	1	1	1	1	1	0	0	0
R_RNDR1	1	1	1	1	1	0	1.19904e-14	1.29896e-14
R_RNDR1b	1	1	1	1	1	0	0	0
R_RNDR2	1	1	1	1	1	9.99201e-15	2.9976e-14	4.89608e-14
R_RNDR2b	1	1	1	1	1	0	0	0
R_RNDR3	1	1	1	1	1	0	0	-9.99201e-15
R_RNDR3b	1	1	1	1	1	0	0	0
R_RNDR4	1	1	1	1	1	-1.9984e-15	2.9976e-15	1.29896e-14
R_RNDR4b	1	1	1	1	1	0	0	0
R_RNTR1	1	1	1	1	1	-9.99201e-16	-1.9984e-15	1.4988e-14
R_RNTR2	0.9	1	1	0.833333	1	-0.1	-0.1	-0.166667
R_RNTR3	0.1	0.25	0.163028	0.166667	0.138889	-0.15	-0.0630284	0.0277778
R_RNTR4	0.999944	0.999656	0.999886	0.999907	0.999862	0.000288727	5.83119e-05	4.49118e-05
R_RPE	0	0.116698	0.0644514	0	0.108958	-0.116698	-0.0644514	-0.108958
R_RPI	0.096993	0	0.0320674	0.161655	0.0819501	0.096993	0.0649256	0.0797049
R_SALCpts	1	1	1	1	1	0	0	0
R_SBTpts	1	1	1	1	1	0	0	0
R_SERGLUGLNtr	1	1	1	1	1	0	0	0
R_SERabc	0.994687	0.996751	0.997042	0.996386	0.996779	-0.00206458	-0.00235498	-0.000393412
R_SO3abcpp	1	1	1	1	1	0	0	0
R_SPMDabc	1	1	1	1	1	0	0	0
R_SPMDabcpp	1	1	1	1	1	0	0	0
R_SUCR	1	1	1	1	1	0	0	0
R_SUCpts	1	1	1	1	1	0	0	0
R_SULabc	0	0.125	0.0869542	0	0.0555556	-0.125	-0.0869542	-0.0555556
R_THFAT	1	1	1	1	1	0	0	0
R_THFOR1	1	1	1	1	1	4.996e-15	3.79696e-14	4.996e-14
R_THFOR2	1	1	1	1	1	0	0	0
R_THIORDXi	1	1	1	1	1	0	0	0
R_THRA	1	1	1	1	1	0	0	0
R_THRA2	0.0419702	0.125	0.170539	0.0543694	0.179275	-0.0830298	-0.128569	-0.124906
R_THRabc	0	0	0	0	0	0	0	0
R_TKT1	0	0.121694	0.0752051	0	0.0819948	-0.121694	-0.0752051	-0.0819948
R_TKT2	0	0.116698	0.0428328	0	0.0537106	-0.116698	-0.0428328	-0.0537106
R_TMDK1	1	1	1	1	1	0	0	0
R_TMDK1_1	1	1	1	1	1	0	0	0
R_TMDPP	1	1	1	1	1	0	0	0
R_TMDS	0	0	0.0325491	0	0	0	-0.0325491	0
R_TPI	0.332138	0.463029	0.384405	0.280409	0.416136	-0.130891	-0.052267	-0.135727
R_TRDR	0.1	0.24986	0.163028	0.166667	0.138858	-0.14986	-0.0630284	0.0278088
R_TRE6PH	1	1	1	1	1	0	0	0
R_TREabc	1	1	1	1	1	0	0	0
R_TREpts	1	1	1	1	1	0	0	0
R_TRPabc	0	0	0	0	0	0	0	0
R_TSULabcpp	1	1	1	1	1	0	0	0
R_TYRabc	0	0.12434	0.0108696	0	0.0276311	-0.12434	-0.0108696	-0.0276311
R_UMPK	0	0	0	0	0	0	0	0
R_UPPRT	0.1	0.125	0.0217391	0.166667	0.0277778	-0.025	0.0782609	0.138889
R_URIDK2r	0.999944	0.999518	0.999867	0.999907	0.999814	0.000426069	7.72287e-05	9.28662e-05
R_VALabc	0.2	0.125	0.0326087	0.166667	0.0833333	0.075	0.167391	0.0833333
R_X5PL3E	1	1	1	1	1	0	0	0
R_XPPT	0.9	1	0.891304	1	0.833333	-0.1	0.00869565	0.166667
R_XYLabcpp	1	1	1			0	0
R_YUMPS	1	1	1	1	1	0	0	0
R_ZNabc	0.5	0.125	0.0217391	0.5	0.0277778	0.375	0.478261	0.472222
R_r0280	1	1	1	1	1	-6.99441e-15	1.4988e-14	-1.9984e-15
R_r0963	0.0999944	0	0	0	0	0.0999944	0.0999944	0
R_r2136	0.7	0.5	1.4972e-14	0.666667	0.111111	0.2	0.7	0.555556
R_LCTSabc	1	1	1	1	1	0	0	0
R_GCCa	1	1	1	1	1	0	0	0
