# Supplementary material for: Exploring the pangenome of Mycoplasma hyorhinis in search of potential virulence markers
Source: Research Square preprint supplement (doi:10.21203/rs.3.rs-7195312/v1), 2025-08-22
Supplement: Supplementary file 5 [file efac72baf42a94b33f092625.xlsx]

## Sheet: Sheet1
Supplementary table 3. Point mutations found in DNA gyrase and topoisomerase genes
Gene	Mutation	Strain	Comments	Studies reviewing this position
gyrA	Ala83Glu	RM5-5	Systemic strain	Gautier-Bouchardon, 2018
	Ser83Ala	All strains		Gautier-Bouchardon, 2018 and Gaeta, et al. 2024
	Ala84Ser	All strains		Gautier-Bouchardon, 2018 and Gaeta, et al. 2024
	Thr88Ser	All strains		Gaeta, et al. 2024
	Ile89Met	All strains		Gaeta, et al. 2024
	Met101Pro	All strains		Gaeta, et al. 2024
	Val103Ile	All strains		Gaeta, et al. 2024
	Gln106His	All strains		Gaeta, et al. 2024
	Ser116Glu	All strains		Gaeta, et al. 2024
	Ala93Ser	All strains		Not observed in other Mycoplasmas. However, identified as QRDR by Gaeta, et al. 2024
	Pro95Asp	All strains		Not observed in other Mycoplasmas. However, identified as QRDR by Gaeta, et al. 2024
	Ser97Ala	All strains		Not observed in other Mycoplasmas. However, identified as QRDR by Gaeta, et al. 2024
	Ser111Phe	103-2.C2, 104-2, 82-3, 83-4	Two isolates from nasal cavity of healthy animals and two from systemic organs	Not observed in other Mycoplasmas. However, identified as QRDR by Gaeta, et al. 2024
parC	Ser80Phe	62-1	Systemic strain	Gautier-Bouchardon, 2018
	Ser80Tyr	RM5-5	Systemic strain	Gautier-Bouchardon, 2018
parE	Asp420Glu	All strains		Gautier-Bouchardon, 2018
				*QRDR = Quinolone Resistance Determinant Region
