# Supplementary figures and images for: Exploring the pangenome of Mycoplasma hyorhinis in search of potential virulence markers
Source: Research Square preprint supplement (doi:10.21203/rs.3.rs-7195312/v1), 2025-08-22

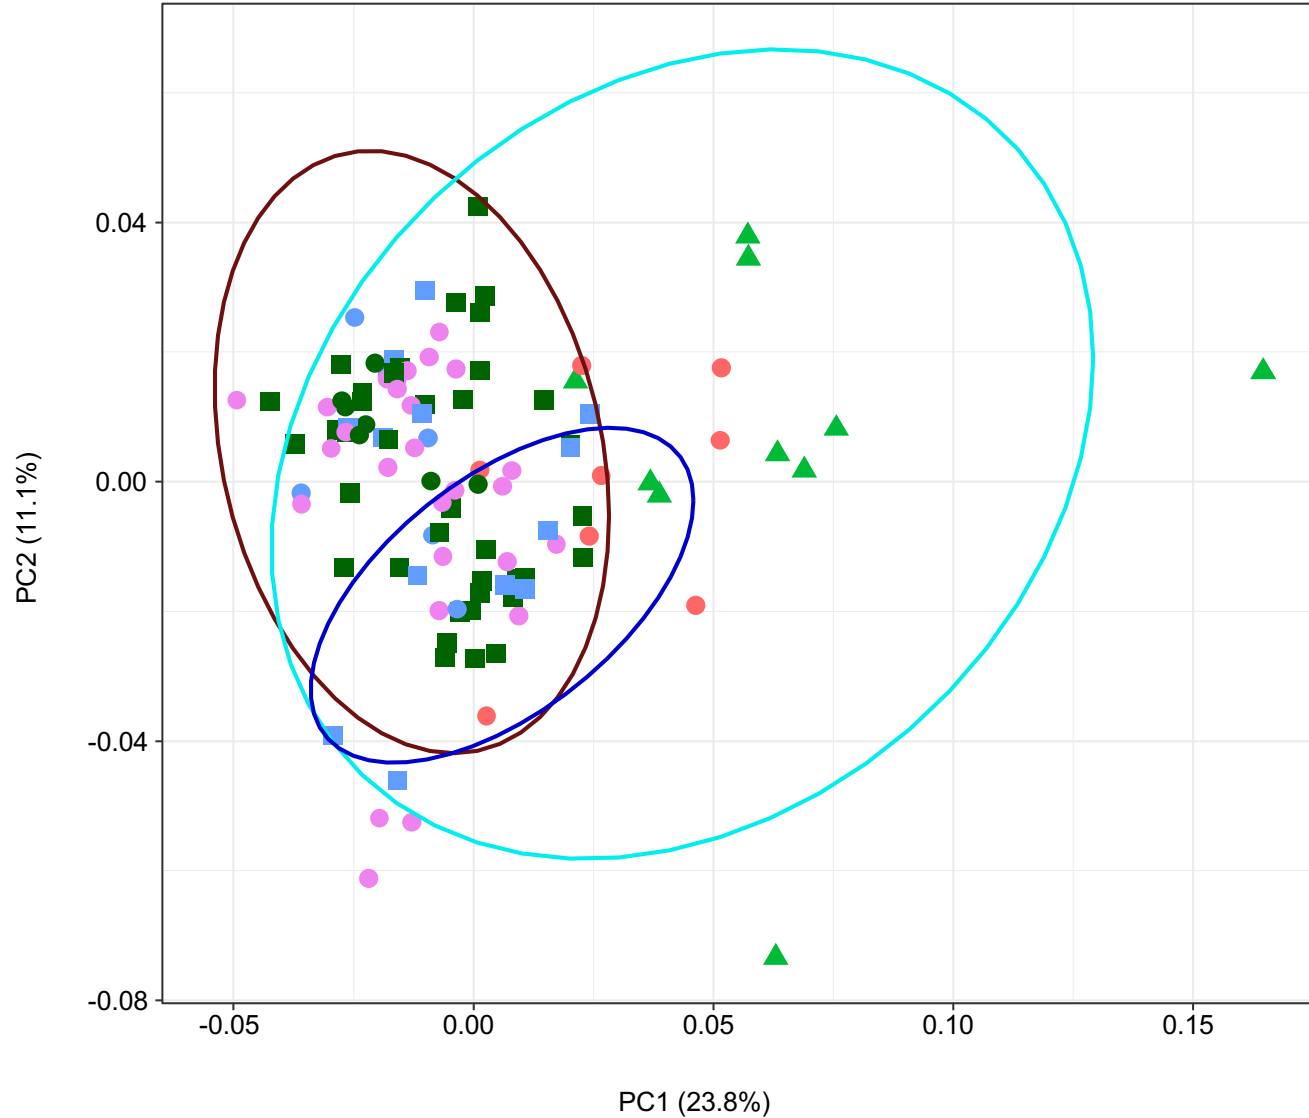

Supplement: Supplementary file 1 [file 4d83d256a9bfda137a16df3b.pdf]
